# Supplementary material for: Inter-Species Host Gene Expression Differences in Response to Human and Avian Influenza A Virus Strains
Source: MDPI journal article supplement (doi:10.3390/ijms18112295), 2017-11-01
Supplement: s1 [file s1]

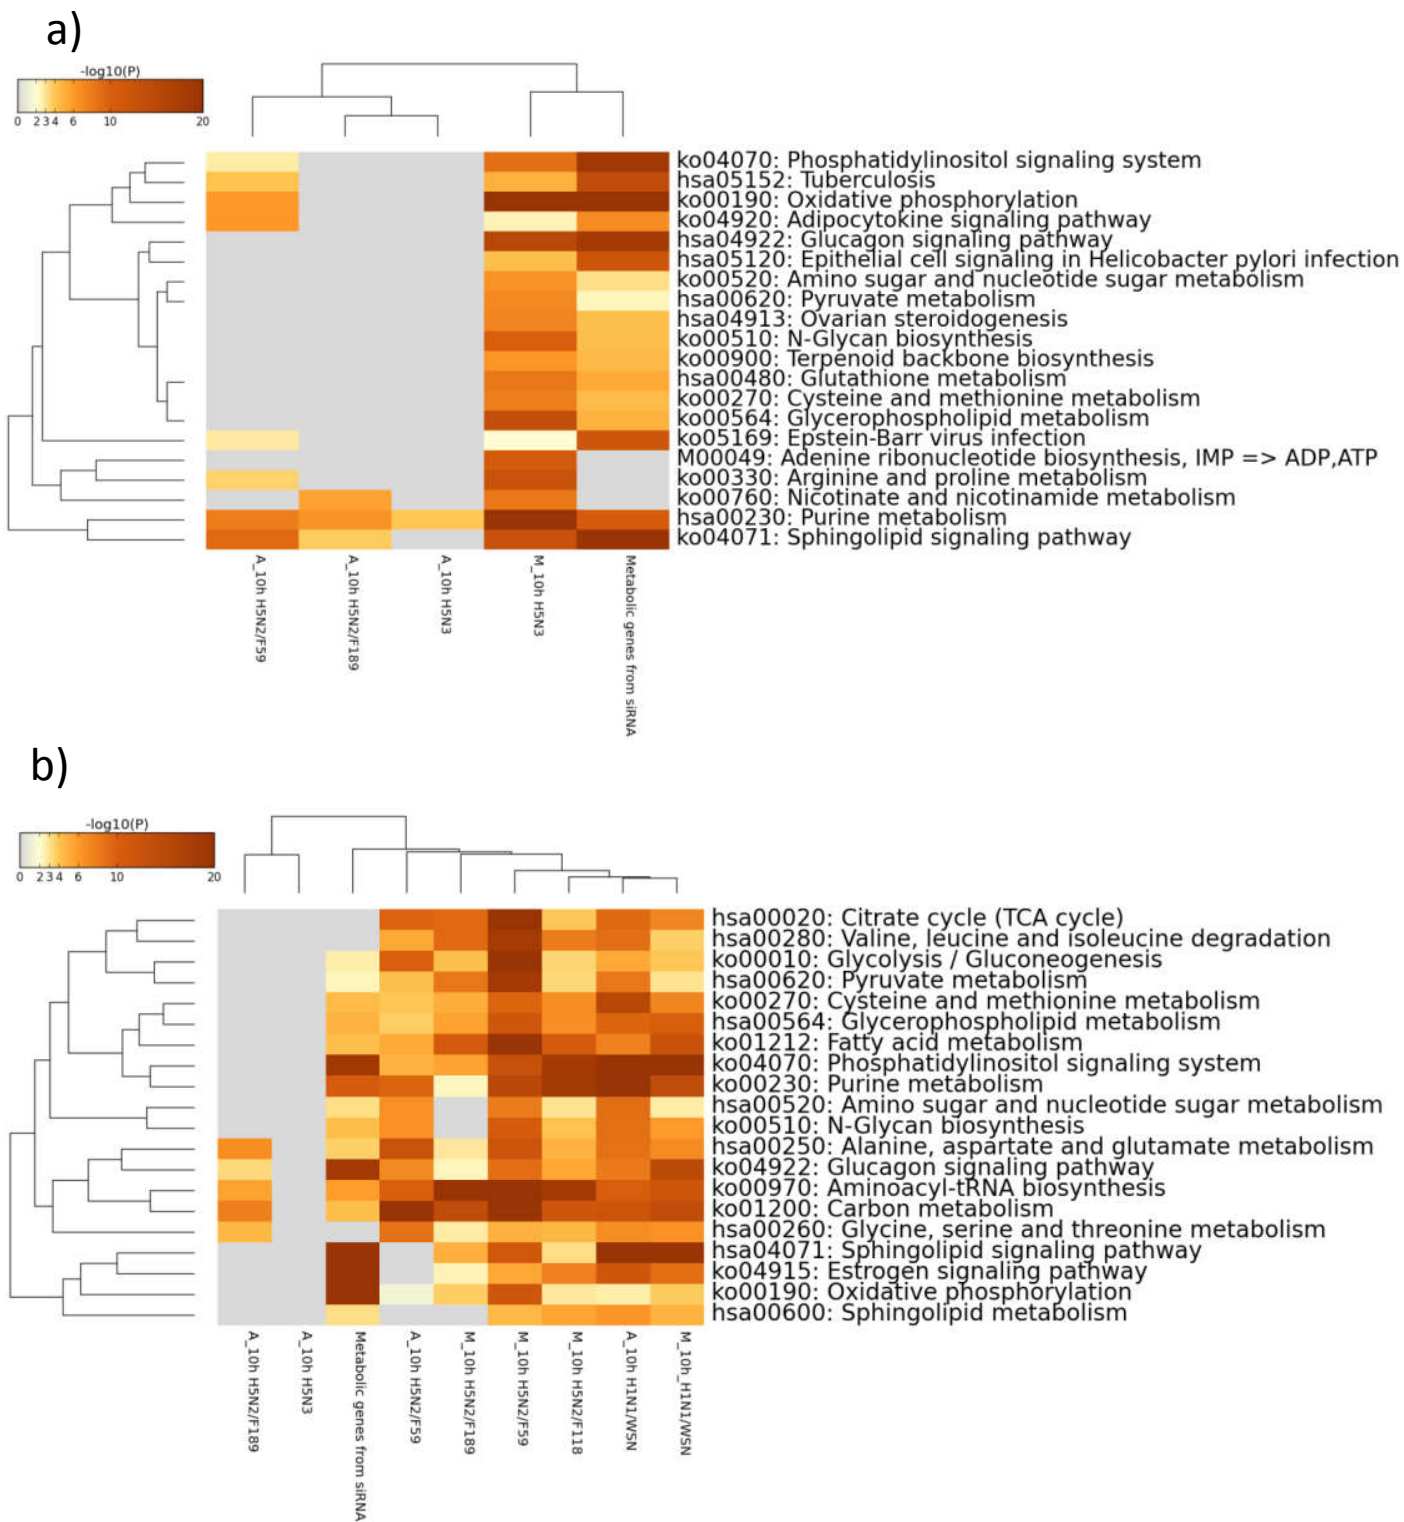

Figure S1: Comparison of metabolic pathways between the pro-viral siRNA screens and DEGs. **(a)** Top 20 pro-viral metabolic pathways (from siRNA screens) across the up-regulated metabolic pathways across the cells and the virus infections; **(b)** Top 20 pro-viral metabolic pathways (from the siRNA screens) across the down-regulated metabolic pathways across the cells and the virus infections; Figure captions should move under supplementary figure.
