# Supplementary material for: Inter-Species Host Gene Expression Differences in Response to Human and Avian Influenza A Virus Strains
Source: Int J Mol Sci. 2017 Nov 1;18(11):2295. doi: 10.3390/ijms18112295 (PMC5713265; doi:10.3390/ijms18112295)
Supplement: Supplementary file 1 [file ijms-18-02295-s001.zip › Supplementary Files/Table S1.xlsx]

## Sheet: Title
Table S1: List of probe sets before and after annotation, gene lists and their corresponding orthologs in the three species

## Sheet: Non-annotated probes
Chicken Genome array			Canine Genome 2.0 array
Size of my Hash is: 16055			Size of my Hash is: 13195
Gga.7894.1.S1_at	1		Cfa.3280.2.A1_at	1
Gga.17768.1.S1_at	1		Cfa.9686.1.A1_at	1
Gga.16961.1.S1_at	1		CfaAffx.15733.1.S1_at	1
Gga.18662.1.S1_at	1		Cfa.4519.1.A1_at	1
GgaAffx.5913.1.S1_at	1		Cfa.1495.1.A1_at	1
Gga.5289.1.S1_at	1		Cfa.7862.1.A1_at	1
Gga.16148.1.S1_at	1		CfaAffx.28049.1.S1_at	1
GgaAffx.21415.1.S1_at	1		Cfa.3302.1.S1_at	1
Gga.5241.1.S1_at	1		CfaAffx.17025.1.S1_at	1
GgaAffx.24221.1.A1_at	1		Cfa.13672.1.A1_at	1
Gga.12277.1.S1_at	1		Cfa.15781.1.S1_at	1
Gga.11365.1.S1_at	1		CfaAffx.16.1.S1_at	1
Gga.18592.1.S1_at	1		Cfa.4826.2.S1_at	1
Gga.13211.1.S1_at	1		Cfa.6572.2.A1_at	1
GgaAffx.5653.2.S1_at	1		Cfa.1304.1.S1_at	1
GgaAffx.25777.1.S1_at	1		Cfa.17628.1.S1_at	1
GgaAffx.24974.1.A1_at	1		Cfa.3990.1.A1_at	1
GgaAffx.2763.1.S1_at	1		Cfa.12550.1.A1_at	1
Gga.12005.1.S1_at	1		Cfa.8480.1.A1_at	1
Gga.8268.1.S1_a_at	1		Cfa.12785.1.A1_at	1
Gga.18532.1.S1_at	1		Cfa.20930.1.S1_at	1
GgaAffx.584.1.A1_at	1		Cfa.18437.1.S1_at	1
Gga.13282.2.S1_s_at	1		CfaAffx.17922.1.S1_at	1
NC-005264.CDS4.S1_at	1		Cfa.15358.1.A1_at	1
NC-002188.CDS85.S1_at	1		Cfa.2511.1.A1_s_at	1
Gga.500.1.S1_at	1		Cfa.20281.1.S1_at	1
Gga.13646.1.S1_at	1		Cfa.8690.1.A1_a_at	1
AY013303.CDS2.S1_s_at	1		Cfa.8677.1.A1_at	1
Gga.177.1.S1_at	1		RPTR-Cfa-AF403737-1_at	1
Gga.4101.1.S1_at	1		Cfa.20328.1.S1_at	1
Gga.8164.2.S1_at	1		CfaAffx.678.1.S1_at	1
Gga.6468.1.S1_at	1		Cfa.2981.1.A1_at	1
Gga.19734.1.S1_at	1		Cfa.12515.1.A1_s_at	1
Gga.19222.1.S1_at	1		CfaAffx.5056.1.S1_x_at	1
Gga.19213.1.S1_at	1		Cfa.19084.1.S1_at	1
GgaAffx.20849.1.S1_at	1		Cfa.14014.1.A1_at	1
Gga.15543.1.S1_a_at	1		CfaAffx.15319.1.S1_s_at	1
Gga.9417.1.S1_at	1		Cfa.17853.1.S1_at	1
GgaAffx.20811.1.S1_at	1		Cfa.13943.2.A1_a_at	1
Gga.505.1.A1_at	1		Cfa.1533.1.A1_at	1
GgaAffx.20677.1.S1_at	1		Cfa.4823.1.A1_s_at	1
AF004857.CDS2.S1_s_at	1		Cfa.15408.1.A1_at	1
Gga.19629.1.S1_at	1		Cfa.17102.1.S1_at	1
Gga.13616.1.A1_at	1		CfaAffx.1763.1.S1_at	1
Gga.12691.1.S1_at	1		Cfa.879.1.S1_at	1
GgaAffx.10275.1.S1_at	1		Cfa.673.1.S1_at	1
Gga.1673.1.A1_at	1		Cfa.3023.1.A1_at	1
Gga.18686.1.S1_at	1		Cfa.16299.1.S1_at	1
GgaAffx.21708.1.S1_s_at	1		Cfa.20142.1.S1_s_at	1
Gga.5086.1.A1_at	1		CfaAffx.24887.1.S1_at	1
Gga.18468.1.S1_at	1		Cfa.7298.1.A1_a_at	1
Gga.17561.1.S1_at	1		Cfa.3030.1.A1_at	1
Gga.10205.1.S1_at	1		CfaAffx.785.1.S1_at	1
GgaAffx.12511.1.S1_at	1		CfaAffx.16617.1.S1_at	1
Gga.10992.1.S1_at	1		Cfa.5877.1.A1_at	1
Gga.6089.1.S1_at	1		Cfa.11528.1.A1_at	1
Gga.9543.1.S1_at	1		CfaAffx.12265.1.S1_s_at	1
Gga.11970.1.S1_at	1		Cfa.4609.2.A1_x_at	1
Gga.10503.1.S1_at	1		Cfa.10788.1.A1_at	1
Gga.1788.2.S1_at	1		Cfa.10041.1.S1_s_at	1
GgaAffx.3682.1.S1_at	1		Cfa.6698.1.S1_at	1
Gga.12420.1.S1_at	1		CfaAffx.13701.1.S1_at	1
GgaAffx.10092.1.S1_at	1		Cfa.7649.1.A1_at	1
Gga.14866.1.S1_at	1		Cfa.13773.1.A1_at	1
Gga.17089.1.S1_at	1		Cfa.5330.1.A1_at	1
Gga.2416.1.S2_at	1		CfaAffx.32021.1.S1_at	1
Gga.14266.1.S1_at	1		Cfa.1693.1.A1_at	1
Gga.9287.1.S1_s_at	1		Cfa.8784.1.S1_at	1
Gga.751.1.A1_at	1		Cfa.7007.1.A1_x_at	1
Gga.9530.1.S1_s_at	1		CfaAffx.1668.1.S1_at	1
Gga.6732.1.S1_at	1		Cfa.4540.1.A1_at	1
Gga.14443.1.S1_at	1		CfaAffx.22282.1.S1_at	1
Gga.260.7.A1_a_at	1		Cfa.4369.1.A1_at	1
Gga.10702.1.S1_at	1		CfaAffx.18742.1.S1_at	1
Gga.15241.1.S1_at	1		Cfa.15475.1.A1_at	1
Gga.3901.1.S1_at	1		Cfa.19835.1.S1_at	1
Gga.17942.1.A1_at	1		CfaAffx.30709.1.S1_s_at	1
Gga.5458.1.S1_at	1		Cfa.12171.1.A1_at	1
GgaAffx.7432.1.S1_at	1		Cfa.5632.1.A1_at	1
Gga.16141.1.S1_at	1		Cfa.11786.1.A1_at	1
Gga.13831.1.S1_at	1		Cfa.11679.1.A1_at	1
Gga.1441.1.S1_at	1		CfaAffx.28481.1.S1_at	1
Gga.11040.2.S1_a_at	1		Cfa.7328.1.A1_at	1
GgaAffx.8177.1.A1_at	1		Cfa.4404.1.S1_at	1
GgaAffx.12103.1.S1_s_at	1		Cfa.9735.1.A1_at	1
Gga.7957.1.S1_at	1		Cfa.10024.1.A1_at	1
Gga.1825.1.S1_s_at	1		Cfa.20252.1.S1_at	1
Gga.10892.1.S1_a_at	1		Cfa.17388.1.S1_s_at	1
Gga.10692.1.S1_at	1		Cfa.13712.1.A1_at	1
Gga.351.1.S1_at	1		Cfa.2508.1.A1_at	1
Gga.15002.1.A1_at	1		Cfa.5800.1.A1_at	1
Gga.10582.1.A1_at	1		Cfa.6034.1.A1_at	1
GgaAffx.8674.1.S1_at	1		Cfa.21350.1.S1_at	1
Gga.14767.1.S1_at	1		Cfa.1156.1.A1_at	1
Gga.14625.1.S1_at	1		Cfa.15345.1.S1_at	1
Gga.9938.1.S1_at	1		Cfa.10457.1.S1_at	1
Gga.17859.1.S1_at	1		Cfa.14893.1.A1_at	1
GgaAffx.20259.1.S1_at	1		Cfa.12873.1.A1_at	1
Gga.10802.1.S1_at	1		Cfa.11018.1.A1_at	1
GgaAffx.12219.1.S1_s_at	1		CfaAffx.32023.1.S1_at	1
Gga.19687.1.S1_at	1		Cfa.895.1.A1_at	1
Gga.18067.1.A1_at	1		Cfa.7498.1.A1_at	1
Gga.19911.1.S1_at	1		CfaAffx.26311.1.S1_at	1
Gga.19551.1.S1_at	1		Cfa.18164.1.S1_at	1
Gga.14969.1.A1_at	1		CfaAffx.12048.1.S1_at	1
Gga.18127.1.S1_at	1		Cfa.8171.1.A1_at	1
Gga.14540.1.A1_at	1		Cfa.15774.1.A1_at	1
Gga.12726.1.A1_at	1		Cfa.15771.1.A1_at	1
NC-002641.CDS47.S1_at	1		Cfa.8614.1.A1_at	1
Gga.14166.1.S1_at	1		Cfa.592.1.S1_at	1
Gga.18669.1.S1_at	1		CfaAffx.29249.1.S1_at	1
Gga.10383.1.S1_at	1		Cfa.19690.1.S1_at	1
GgaAffx.20342.1.S1_at	1		Cfa.21551.1.S1_s_at	1
Gga.7572.1.S1_at	1		CfaAffx.24027.1.S1_at	1
Gga.13245.1.S1_at	1		Cfa.515.2.S1_at	1
Gga.18203.1.S1_s_at	1		Cfa.9522.1.A1_at	1
Gga.18165.1.S1_at	1		Cfa.19572.1.S1_at	1
Gga.12821.1.A1_at	1		CfaAffx.7215.1.S1_at	1
GgaAffx.4377.1.S1_at	1		CfaAffx.10749.1.S1_at	1
GgaAffx.24394.1.S1_at	1		Cfa.11321.1.A1_at	1
Gga.19599.1.S1_at	1		CfaAffx.22477.1.S1_at	1
Gga.13094.1.S1_at	1		Cfa.39.2.S1_at	1
Gga.18241.1.S1_at	1		CfaAffx.665.1.S1_at	1
Gga.17370.1.S1_at	1		Cfa.8097.1.A1_at	1
GgaAffx.21245.1.S1_at	1		Cfa.15281.1.S1_at	1
Gga.5696.1.S1_at	1		CfaAffx.5217.1.S1_at	1
GgaAffx.20459.1.S1_at	1		Cfa.5533.1.A1_at	1
Gga.15051.1.A1_at	1		Cfa.11830.1.A1_at	1
GgaAffx.4182.2.S1_at	1		Cfa.14032.1.A1_at	1
Gga.18183.1.A1_at	1		Cfa.585.1.S1_s_at	1
Gga.16326.1.S1_at	1		Cfa.21262.1.S1_at	1
Gga.10784.1.S1_at	1		Cfa.1846.1.S1_at	1
Gga.14619.1.A1_at	1		Cfa.6900.1.A1_at	1
GgaAffx.12445.1.S1_s_at	1		CfaAffx.24858.1.S1_at	1
Gga.6362.1.S1_at	1		Cfa.13476.1.A1_s_at	1
Gga.18490.1.S1_at	1		Cfa.6009.2.A1_at	1
Gga.15145.1.S1_at	1		Cfa.16041.1.S1_at	1
GgaAffx.20290.1.S1_s_at	1		CfaAffx.21964.1.S1_at	1
Gga.2456.1.S1_at	1		Cfa.2063.1.S1_at	1
Gga.18255.1.S1_at	1		Cfa.12899.1.A1_at	1
GgaAffx.13034.1.S1_at	1		Cfa.11399.1.A1_at	1
Gga.902.1.S1_at	1		CfaAffx.4050.1.S1_at	1
NC-005264.CDS43.S1_at	1		Cfa.9808.1.A1_at	1
Gga.18260.1.A1_at	1		Cfa.8239.1.A1_at	1
Gga.15584.1.A1_at	1		Cfa.9599.1.A1_at	1
GgaAffx.10135.2.S1_at	1		CfaAffx.15951.1.S1_at	1
Gga.19255.1.S1_at	1		Cfa.15600.1.A1_at	1
Gga.14614.1.S1_at	1		Cfa.10102.1.A1_at	1
Gga.13692.1.S1_at	1		CfaAffx.23999.1.S1_at	1
GgaAffx.6776.1.S1_s_at	1		Cfa.7638.1.A1_at	1
GgaAffx.26530.1.A1_at	1		Cfa.4571.1.A1_s_at	1
GgaAffx.22655.1.S1_at	1		Cfa.3758.1.A1_at	1
Gga.10136.1.A1_at	1		CfaAffx.27930.1.S1_x_at	1
Gga.17207.1.S1_at	1		Cfa.20911.2.S1_at	1
NC-002188.CDS186.S1_at	1		Cfa.14725.1.A1_at	1
NC-005264.CDS24.S1_at	1		CfaAffx.6947.1.S1_s_at	1
Gga.967.1.S1_at	1		Cfa.7131.1.A1_at	1
Gga.8430.1.S1_at	1		Cfa.6152.1.A1_at	1
GgaAffx.11595.1.S1_at	1		Cfa.9772.1.A1_at	1
GgaAffx.25970.1.S1_at	1		Cfa.7810.1.A1_at	1
Gga.19583.1.S1_at	1		Cfa.4096.1.S1_at	1
GgaAffx.11428.1.S1_at	1		CfaAffx.664.1.S1_x_at	1
Gga.14580.1.A1_at	1		Cfa.14372.1.S1_at	1
NC-002188.CDS29.S1_at	1		Cfa.837.1.S1_at	1
NC-000899.CDS16.S1_at	1		Cfa.12916.1.S1_at	1
Gga.7070.1.S1_at	1		Cfa.12796.1.A1_at	1
GgaAffx.20856.1.S1_at	1		AFFX-DapX-5_at	1
GgaAffx.20739.1.S1_at	1		CfaAffx.2935.1.S1_at	1
Gga.17865.1.A1_at	1		Cfa.2357.1.S1_at	1
Gga.14563.1.A1_at	1		CfaAffx.2707.1.S1_at	1
Gga.13617.1.S1_at	1		Cfa.5733.1.A1_at	1
Gga.15785.1.S1_at	1		Cfa.2339.1.A1_at	1
Gga.2986.3.A1_at	1		CfaAffx.8240.1.S1_at	1
GgaAffx.1147.1.A1_at	1		Cfa.14878.1.A1_at	1
Gga.6035.1.S1_at	1		Cfa.4721.1.A1_at	1
Gga.9363.2.S1_a_at	1		Cfa.13606.1.A1_at	1
Gga.14807.1.A1_at	1		Cfa.13367.1.A1_at	1
GgaAffx.5193.1.S1_at	1		Cfa.9639.1.A1_at	1
Gga.3077.1.S1_at	1		CfaAffx.12399.1.S1_at	1
Gga.11034.1.S1_at	1		CfaAffx.18018.1.S1_at	1
Gga.19024.1.S1_s_at	1		Cfa.20649.1.S1_at	1
Gga.3973.1.S1_at	1		Cfa.7434.1.A1_at	1
Gga.2478.1.S1_at	1		Cfa.2567.2.S1_s_at	1
Gga.18148.1.S1_at	1		Cfa.7976.1.A1_at	1
Gga.5845.1.S1_at	1		Cfa.8061.1.A1_at	1
Gga.18558.1.S1_at	1		Cfa.5441.1.A1_at	1
Gga.18883.1.A1_at	1		Cfa.3824.1.A1_at	1
Gga.17180.1.S1_at	1		Cfa.3321.1.S1_at	1
Gga.2564.1.S1_s_at	1		Cfa.11046.1.A1_s_at	1
NC-005264.CDS65.S1_at	1		CfaAffx.28482.1.S1_at	1
GgaAffx.11974.1.S1_at	1		Cfa.13810.1.A1_at	1
Gga.11599.1.S1_at	1		Cfa.11043.1.A1_at	1
Gga.6828.2.S1_a_at	1		Cfa.677.1.S1_at	1
Gga.18708.1.A1_at	1		Cfa.1715.1.S1_at	1
GgaAffx.3247.1.A1_at	1		CfaAffx.15308.1.S1_at	1
Gga.7350.1.S1_at	1		Cfa.3217.1.A1_at	1
Gga.12461.3.A1_at	1		CfaAffx.9397.1.S1_s_at	1
NC-002188.CDS228.S1_at	1		Cfa.7051.1.A1_at	1
Gga.3316.1.S1_s_at	1		Cfa.6724.2.A1_at	1
Gga.18137.1.S1_at	1		Cfa.12863.1.A1_at	1
GgaAffx.20943.1.S1_at	1		Cfa.11086.1.A1_at	1
GgaAffx.21130.1.S1_at	1		CfaAffx.15036.1.S1_s_at	1
Gga.17650.1.S1_at	1		Cfa.18725.1.S1_at	1
Gga.13611.1.A1_at	1		CfaAffx.951.1.S1_at	1
GgaAffx.20941.1.S1_at	1		Cfa.8822.1.A1_at	1
GgaAffx.9429.4.A1_at	1		Cfa.5548.1.A1_at	1
Gga.5378.2.A1_at	1		Cfa.4347.1.S1_at	1
AFFX-DapX-5_at	1		Cfa.16969.1.S1_x_at	1
GgaAffx.9213.1.S1_at	1		Cfa.7646.1.A1_at	1
Gga.12808.1.S1_at	1		Cfa.10907.1.S1_at	1
GgaAffx.1423.1.S1_at	1		Cfa.14905.1.A1_a_at	1
Gga.18284.1.A1_at	1		Cfa.19679.1.S1_at	1
Gga.17920.1.S1_at	1		Cfa.13515.1.S1_at	1
Gga.18307.1.S1_at	1		Cfa.14044.1.A1_at	1
Gga.16975.1.S1_at	1		Cfa.16832.1.S1_at	1
Gga.5864.1.S1_at	1		Cfa.1626.1.S1_at	1
GgaAffx.20936.1.S1_at	1		CfaAffx.32069.1.S1_at	1
GgaAffx.3686.1.S1_at	1		Cfa.5951.1.A1_at	1
GgaAffx.24687.1.S1_at	1		Cfa.5683.1.A1_at	1
Gga.3823.2.S1_a_at	1		Cfa.6747.1.A1_a_at	1
Gga.15171.1.S1_at	1		Cfa.5850.1.A1_at	1
Gga.13754.1.S1_at	1		Cfa.16376.1.A1_at	1
AF243438.CDS18.S1_s_at	1		Cfa.7327.1.A1_at	1
GgaAffx.8329.1.S1_at	1		Cfa.8993.1.A1_at	1
GgaAffx.21407.1.S1_at	1		CfaAffx.24497.1.S1_s_at	1
GgaAffx.12181.1.S1_at	1		Cfa.14552.1.A1_at	1
Gga.8243.1.S1_at	1		Cfa.11544.1.A1_at	1
Gga.14003.1.S1_at	1		Cfa.14833.1.A1_at	1
Gga.4094.1.A1_at	1		Cfa.9887.1.A1_at	1
Gga.18198.1.S1_at	1		CfaAffx.16599.1.S1_at	1
Gga.12149.2.S1_at	1		Cfa.15402.1.A1_s_at	1
Gga.13682.1.S1_at	1		Cfa.5935.1.A1_at	1
GgaAffx.8051.1.S1_at	1		Cfa.4758.1.A1_at	1
Gga.469.2.S1_at	1		CfaAffx.6224.1.S1_s_at	1
Gga.4772.1.S1_at	1		Cfa.7916.1.A1_at	1
Gga.13290.1.S1_at	1		Cfa.5648.1.A1_at	1
Gga.13073.1.S1_at	1		Cfa.2480.1.S1_at	1
Gga.15224.1.S1_at	1		Cfa.20844.1.S1_at	1
Gga.407.1.S1_at	1		Cfa.14995.1.A1_at	1
Gga.10117.2.S1_a_at	1		Cfa.4836.1.A1_at	1
Gga.18548.2.A1_at	1		Cfa.5365.1.A1_at	1
Gga.16848.1.S1_at	1		CfaAffx.25116.1.S1_s_at	1
Gga.7713.1.S1_at	1		Cfa.19700.1.S1_s_at	1
NC-005264.CDS58.S1_at	1		Cfa.19341.1.S1_at	1
GgaAffx.6064.1.S1_at	1		Cfa.15729.1.A1_at	1
GgaAffx.21113.1.S1_at	1		Cfa.13404.1.A1_at	1
Gga.5077.1.S1_s_at	1		Cfa.17444.1.S1_at	1
Gga.15841.1.S1_at	1		Cfa.1399.1.A1_at	1
Gga.13465.1.S1_at	1		Cfa.8498.1.A1_at	1
Gga.13924.1.S1_at	1		CfaAffx.6270.1.S1_at	1
Gga.16097.1.S1_at	1		CfaAffx.14005.1.S1_s_at	1
Gga.13111.1.S1_at	1		Cfa.5634.1.A1_at	1
GgaAffx.7727.2.S1_s_at	1		CfaAffx.23395.1.S1_x_at	1
Gga.17679.1.S1_at	1		Cfa.5704.1.A1_at	1
GgaAffx.849.1.S1_at	1		Cfa.15834.1.S1_at	1
Gga.7107.1.S1_at	1		Cfa.17410.1.S1_at	1
Gga.19772.1.S1_at	1		AFFX-r2-Ec-bioC-5_at	1
Gga.15896.1.S1_at	1		CfaAffx.22871.1.S1_at	1
GgaAffx.6131.1.S1_at	1		Cfa.6450.1.A1_at	1
Gga.14684.1.S1_at	1		Cfa.14222.1.A1_at	1
Gga.18710.1.S1_at	1		Cfa.7928.1.A1_at	1
Gga.15511.1.S1_at	1		Cfa.6350.1.A1_at	1
Gga.15121.1.S1_at	1		Cfa.14887.1.A1_at	1
NC-002641.CDS13.S1_at	1		Cfa.14172.1.A1_at	1
Gga.1550.1.S1_s_at	1		Cfa.10535.1.S1_at	1
Gga.13688.1.A1_at	1		Cfa.9771.1.A1_at	1
Gga.7123.1.S1_at	1		CfaAffx.30889.1.S1_at	1
Gga.5878.1.S1_at	1		Cfa.14170.1.S1_a_at	1
Gga.19533.1.S1_at	1		Cfa.8225.1.A1_at	1
GgaAffx.26305.1.S1_at	1		Cfa.20168.2.A1_at	1
Gga.285.1.S1_at	1		Cfa.8468.1.A1_at	1
Gga.10945.1.S1_at	1		Cfa.3614.1.A1_at	1
Gga.17622.1.S1_at	1		Cfa.9534.1.A1_at	1
Gga.2621.1.S1_at	1		Cfa.8332.1.A1_s_at	1
GgaAffx.12975.1.S1_at	1		Cfa.5901.1.A1_at	1
Gga.10977.1.S1_at	1		Cfa.14990.2.A1_at	1
Gga.6673.1.S1_at	1		Cfa.9325.1.A1_x_at	1
Gga.8289.3.A1_at	1		Cfa.5943.1.A1_at	1
Gga.17872.1.A1_at	1		Cfa.5708.1.A1_at	1
GgaAffx.20325.1.S1_at	1		Cfa.12549.1.A1_at	1
GgaAffx.3494.1.A1_at	1		Cfa.4834.1.A1_at	1
Gga.4320.2.A1_at	1		Cfa.1398.1.A1_s_at	1
GgaAffx.1575.1.S1_at	1		Cfa.2522.1.S1_at	1
Gga.9764.1.S1_at	1		CfaAffx.26428.1.S1_s_at	1
Gga.11287.1.A1_at	1		Cfa.8577.1.A1_at	1
Gga.6530.1.A1_at	1		Cfa.7682.1.A1_at	1
Gga.16692.1.A1_x_at	1		Cfa.12861.1.A1_at	1
Gga.14908.1.S1_at	1		Cfa.7839.1.S1_x_at	1
GgaAffx.23514.1.A1_at	1		Cfa.13032.1.A1_x_at	1
Gga.19053.1.S1_at	1		CfaAffx.13305.1.S1_at	1
GgaAffx.20472.1.S1_at	1		Cfa.14275.1.A1_at	1
GgaAffx.21195.1.S1_s_at	1		Cfa.4668.1.A1_at	1
AY510475.CDS65.S1_s_at	1		Cfa.2236.1.A1_at	1
Gga.13710.1.S1_at	1		CfaAffx.4381.1.S1_at	1
GgaAffx.21572.1.S1_at	1		Cfa.8086.1.A1_at	1
Gga.7400.1.S1_at	1		Cfa.5205.1.A1_at	1
Gga.72.1.S1_at	1		Cfa.18667.1.S1_at	1
Gga.8753.1.S1_at	1		Cfa.11862.1.A1_at	1
Gga.10575.1.S1_at	1		CfaAffx.22338.1.S1_s_at	1
Gga.7289.1.S1_at	1		Cfa.2519.1.A1_at	1
Gga.17196.1.S1_at	1		Cfa.9950.1.A1_at	1
Gga.17091.1.S1_at	1		CfaAffx.3747.1.S1_at	1
Gga.14593.1.S1_at	1		CfaAffx.28533.1.S1_s_at	1
Gga.3562.1.S1_at	1		CfaAffx.19868.1.S1_s_at	1
Gga.14329.1.A1_at	1		CfaAffx.19803.1.S1_at	1
NC-002188.CDS160.S1_at	1		Cfa.8690.2.A1_x_at	1
Gga.14531.1.S1_at	1		Cfa.1825.1.A1_at	1
Gga.5838.1.A1_at	1		Cfa.12108.1.S1_at	1
Gga.5449.1.S1_at	1		Cfa.11246.1.A1_at	1
GgaAffx.2951.1.A1_x_at	1		Cfa.1992.1.S1_at	1
GgaAffx.5450.1.S1_at	1		CfaAffx.682.1.S1_x_at	1
Gga.17771.1.S1_at	1		Cfa.8014.1.A1_at	1
Gga.17900.1.S1_at	1		CfaAffx.3644.1.S1_at	1
Gga.3989.1.S1_at	1		CfaAffx.5367.1.S1_at	1
Gga.11751.1.S1_at	1		Cfa.8952.2.A1_at	1
Gga.12370.1.S1_at	1		Cfa.635.1.A2_at	1
AFFX-r2-Ec-bioC-5_at	1		Cfa.19734.1.S1_at	1
Gga.19153.1.S1_at	1		Cfa.5171.1.A1_at	1
Gga.13328.1.S1_at	1		Cfa.13559.1.A1_at	1
Gga.14326.1.S1_at	1		Cfa.5376.1.A1_at	1
Gga.18297.1.S1_at	1		Cfa.19450.1.S1_at	1
GgaAffx.20888.1.S1_at	1		Cfa.15307.1.S1_at	1
Gga.18335.1.S1_at	1		Cfa.14779.1.S1_at	1
Gga.2633.1.S1_at	1		Cfa.15745.1.A1_at	1
Gga.19327.1.S1_at	1		Cfa.12706.1.A1_at	1
GgaAffx.766.1.S1_at	1		Cfa.1129.2.S1_at	1
GgaAffx.277.1.S1_at	1		Cfa.7307.1.A1_at	1
Gga.55.1.A1_x_at	1		RPTR-Cfa-L36849-1_at	1
GgaAffx.23405.2.S1_at	1		Cfa.16663.1.A1_at	1
Gga.48.1.S1_at	1		Cfa.9763.1.A1_at	1
Gga.14671.1.S1_at	1		CfaAffx.11560.1.S1_at	1
GgaAffx.12648.1.S1_at	1		Cfa.7367.1.A1_at	1
Gga.18224.1.S1_at	1		Cfa.13798.1.A1_at	1
AFFX-Gga-gapdh-5_a_at	1		CfaAffx.23137.1.S1_at	1
Gga.18228.1.A1_at	1		Cfa.9677.1.A1_at	1
Gga.17304.1.S1_at	1		Cfa.8275.1.A1_a_at	1
GgaAffx.3.1.S1_s_at	1		Cfa.5458.2.A1_at	1
GgaAffx.21676.1.S1_at	1		Cfa.6586.1.A1_at	1
Gga.9776.1.S1_at	1		CfaAffx.11884.1.S1_at	1
Gga.9505.1.A1_at	1		Cfa.4516.4.A1_x_at	1
Gga.12687.1.S1_at	1		CfaAffx.25385.1.S1_s_at	1
AF059724.CDS1.S1_at	1		Cfa.15723.1.A1_at	1
GgaAffx.8837.1.S1_at	1		Cfa.15527.1.A1_at	1
Gga.18026.1.S1_at	1		Cfa.9323.1.A1_at	1
Gga.9271.1.S1_a_at	1		Cfa.10032.1.A1_at	1
GgaAffx.24683.1.S1_at	1		Cfa.14476.1.S1_at	1
Gga.1656.1.S1_at	1		Cfa.12941.1.A1_at	1
GgaAffx.23514.1.S1_at	1		Cfa.2397.1.S1_at	1
NC-002188.CDS1.S1_s_at	1		Cfa.7154.1.A1_at	1
Gga.13306.1.S1_at	1		Cfa.3233.1.S1_at	1
Gga.3300.2.S1_a_at	1		Cfa.11712.1.A1_at	1
Gga.18134.1.S1_x_at	1		Cfa.4532.1.A1_at	1
GgaAffx.5811.1.A1_x_at	1		Cfa.16751.1.S1_at	1
Gga.17457.1.S1_at	1		Cfa.14112.1.A1_at	1
Gga.7246.1.S1_at	1		CfaAffx.16260.1.S1_at	1
Gga.16693.1.S1_at	1		Cfa.8770.1.S1_at	1
Gga.17208.1.S1_s_at	1		Cfa.8235.1.A1_at	1
Gga.14822.1.A1_at	1		Cfa.7384.1.A1_at	1
GgaAffx.11957.1.S1_at	1		Cfa.5472.1.A1_at	1
Gga.6593.1.S1_at	1		Cfa.11330.1.A1_at	1
Gga.14261.1.S1_at	1		Cfa.10603.3.S1_at	1
Gga.15762.1.S1_at	1		Cfa.4557.1.S1_at	1
Gga.13794.1.A1_at	1		Cfa.9749.1.S1_at	1
GgaAffx.23732.1.S1_at	1		Cfa.860.1.S1_at	1
Gga.8221.1.S1_at	1		Cfa.7934.1.A1_s_at	1
Gga.16416.1.S1_at	1		Cfa.10696.1.A1_at	1
Gga.13749.1.S1_at	1		Cfa.20958.1.S1_at	1
GgaAffx.4725.1.A1_at	1		Cfa.8154.1.A1_at	1
Gga.9856.2.A1_at	1		Cfa.12623.1.A1_at	1
Gga.11163.1.S1_s_at	1		CfaAffx.22813.1.S1_at	1
GgaAffx.20973.1.S1_at	1		Cfa.6809.1.A1_at	1
Gga.19765.1.S1_at	1		Cfa.4715.1.A1_at	1
Gga.12020.1.S1_at	1		Cfa.2261.1.A1_at	1
Gga.19000.1.S1_at	1		Cfa.17777.1.S1_s_at	1
Gga.14261.1.A1_at	1		Cfa.13748.1.A1_at	1
Gga.18377.1.A1_at	1		Cfa.15006.1.A1_at	1
Gga.11250.2.S1_a_at	1		CfaAffx.12448.1.S1_at	1
GgaAffx.21780.1.S1_s_at	1		Cfa.12409.1.A1_at	1
Gga.4102.1.S1_at	1		Cfa.13994.1.S1_at	1
NC-002188.CDS18.S1_at	1		Cfa.10176.1.A1_at	1
Gga.3393.1.S1_at	1		CfaAffx.345.1.S1_x_at	1
NC-001958.CDS12.S1_at	1		Cfa.19731.2.A1_at	1
Gga.13624.1.A1_at	1		Cfa.11225.1.A1_at	1
GgaAffx.11970.1.S1_at	1		Cfa.4812.1.A1_at	1
GgaAffx.11879.1.S1_s_at	1		Cfa.8389.1.A1_at	1
Gga.19871.1.A1_at	1		Cfa.2721.1.A1_at	1
Gga.16982.1.S1_at	1		Cfa.7421.1.A1_at	1
NC-005264.CDS18.S1_at	1		Cfa.5162.1.A1_at	1
GgaAffx.21831.1.S1_at	1		CfaAffx.13957.1.S1_at	1
Gga.4461.1.S1_at	1		RPTR-Cfa-AF062997-1_at	1
AFFX-Gga-r2-Bs-lys-M_at	1		Cfa.8516.1.A1_at	1
GgaAffx.6803.1.S1_at	1		Cfa.9249.1.A1_at	1
Gga.17958.1.S1_s_at	1		Cfa.8101.1.A1_at	1
Gga.8969.1.S1_at	1		Cfa.12594.1.A1_at	1
Gga.16316.1.S1_at	1		Cfa.2927.1.S1_at	1
AF243438.CDS51.S1_s_at	1		Cfa.17325.1.S1_at	1
Gga.10072.1.S1_at	1		Cfa.19592.1.S1_at	1
GgaAffx.20186.1.S1_at	1		Cfa.16576.1.S1_at	1
Gga.11599.1.S1_s_at	1		Cfa.11556.1.A1_at	1
Gga.16142.1.S1_at	1		Cfa.334.1.A1_s_at	1
Gga.17737.1.S1_at	1		Cfa.11664.1.A1_at	1
Gga.11121.1.A1_at	1		Cfa.15263.2.A1_at	1
Gga.11999.1.A1_s_at	1		Cfa.7567.1.A1_at	1
Gga.5037.1.A1_at	1		CfaAffx.11252.1.S1_s_at	1
GgaAffx.999.1.S1_at	1		Cfa.17901.1.S1_at	1
GgaAffx.7827.1.S1_at	1		Cfa.6794.1.A1_at	1
GgaAffx.12210.1.S1_at	1		Cfa.15652.1.A1_at	1
Gga.11691.1.S1_at	1		Cfa.12984.1.A1_at	1
Gga.10818.1.S1_at	1		Cfa.12626.1.A1_at	1
Gga.1144.2.S1_a_at	1		CfaAffx.708.1.S1_at	1
GgaAffx.8309.1.S1_at	1		Cfa.544.1.A1_at	1
GgaAffx.23494.2.S1_at	1		Cfa.832.1.S1_at	1
GgaAffx.5732.1.S1_at	1		Cfa.8134.1.A1_at	1
Gga.6337.1.S1_at	1		Cfa.14930.1.S1_a_at	1
Gga.19145.1.S1_at	1		CfaAffx.12991.1.S1_at	1
Gga.18111.1.S1_at	1		CfaAffx.10695.1.S1_s_at	1
Gga.14955.1.A1_at	1		Cfa.9166.1.A1_at	1
GgaAffx.25298.2.A1_at	1		Cfa.2657.1.A1_at	1
Gga.18640.1.A1_at	1		Cfa.8559.1.A1_at	1
Gga.15210.1.S1_at	1		Cfa.13637.1.A1_at	1
Gga.19380.1.S1_at	1		CfaAffx.5137.1.S1_at	1
GgaAffx.12748.1.S1_s_at	1		Cfa.6650.1.A1_at	1
Gga.13950.1.S1_at	1		Cfa.12457.1.A1_at	1
GgaAffx.4610.1.S1_s_at	1		CfaAffx.13159.1.S1_at	1
Gga.14984.1.S1_at	1		Cfa.9630.1.A1_at	1
Gga.11062.1.S1_at	1		Cfa.8833.1.A1_a_at	1
Gga.15330.1.S1_at	1		Cfa.8929.1.A1_at	1
Gga.10780.1.S1_at	1		Cfa.9769.1.A1_at	1
Gga.17320.1.S1_at	1		Cfa.4390.1.S1_at	1
Gga.15135.1.A1_at	1		Cfa.7844.1.A1_at	1
Gga.4867.3.S1_a_at	1		Cfa.12687.1.A1_x_at	1
GgaAffx.4630.1.S1_at	1		Cfa.8431.1.A1_at	1
NC-002188.CDS182.S1_at	1		Cfa.14776.1.A1_s_at	1
GgaAffx.21610.1.S1_s_at	1		CfaAffx.4569.1.S1_at	1
Gga.930.1.A1_at	1		Cfa.11130.1.A1_at	1
GgaAffx.21194.1.S1_s_at	1		CfaAffx.16799.1.S1_at	1
Gga.14786.1.A1_at	1		CfaAffx.32075.1.S1_at	1
Gga.13927.1.A1_at	1		Cfa.7981.1.A1_at	1
Gga.14663.1.S1_at	1		Cfa.5633.1.A1_at	1
Gga.10684.1.S1_s_at	1		Cfa.2470.1.A1_at	1
GgaAffx.20652.1.S1_at	1		Cfa.8116.1.A1_at	1
GgaAffx.10038.1.S1_s_at	1		Cfa.20313.1.S1_at	1
Gga.10709.1.S1_at	1		CfaAffx.20831.1.S1_at	1
Gga.12950.1.S1_at	1		Cfa.8972.1.S1_at	1
Gga.1864.1.S1_at	1		Cfa.443.1.A1_at	1
NC-005264.CDS29.S1_at	1		Cfa.10663.1.A1_at	1
GgaAffx.20589.1.S1_at	1		CfaAffx.26161.1.S1_at	1
Gga.17095.1.S1_at	1		Cfa.9799.1.A1_at	1
Gga.14927.1.S1_at	1		Cfa.1587.1.A1_at	1
Gga.12969.1.A1_at	1		Cfa.13529.1.A1_at	1
Gga.11003.1.S1_at	1		Cfa.15977.1.A1_at	1
Gga.8097.1.S1_at	1		Cfa.17165.1.S1_at	1
Gga.7763.1.S1_at	1		Cfa.6673.1.A1_at	1
GgaAffx.9437.1.A1_at	1		Cfa.20036.1.S1_at	1
Gga.19611.1.A1_at	1		CfaAffx.4111.1.S1_at	1
Gga.15024.1.S1_at	1		CfaAffx.14997.1.S1_s_at	1
Gga.11368.1.S1_at	1		Cfa.15737.1.A1_at	1
Gga.812.1.S1_at	1		Cfa.19424.1.S1_at	1
GgaAffx.2243.2.S1_at	1		CfaAffx.11875.1.S1_at	1
Gga.17969.1.S1_at	1		CfaAffx.11945.1.S1_s_at	1
Gga.16522.1.S1_at	1		Cfa.1659.1.A1_at	1
Gga.15517.1.S1_at	1		CfaAffx.22019.1.S1_at	1
Gga.12588.2.S1_a_at	1		CfaAffx.11750.1.S1_s_at	1
GgaAffx.9999.1.S1_at	1		Cfa.9029.1.A1_at	1
Gga.18209.1.A1_at	1		Cfa.2068.1.S1_at	1
Gga.17557.1.S1_at	1		Cfa.582.1.S1_at	1
GgaAffx.20778.1.S1_at	1		Cfa.14226.1.A1_at	1
Gga.1468.1.S1_at	1		Cfa.7405.1.A1_at	1
Gga.13960.1.S1_at	1		Cfa.4800.1.A1_at	1
Gga.13198.1.S1_at	1		Cfa.14858.1.A1_at	1
Gga.11306.1.S1_at	1		Cfa.13527.1.A1_at	1
Gga.13609.1.A1_at	1		Cfa.21340.1.S1_at	1
GgaAffx.9724.1.S1_at	1		Cfa.11420.1.A1_at	1
GgaAffx.7911.1.S1_s_at	1		CfaAffx.28214.1.S1_at	1
Gga.906.1.S1_at	1		Cfa.16996.1.S1_at	1
Gga.7591.1.S1_at	1		Cfa.6133.1.S1_at	1
Gga.1837.1.S1_s_at	1		Cfa.14047.1.A1_at	1
Gga.8587.1.S1_at	1		Cfa.6480.1.A1_at	1
Gga.8330.1.S1_at	1		Cfa.17420.1.S1_at	1
Gga.3671.1.S2_s_at	1		Cfa.11904.1.A1_at	1
Gga.16848.2.A1_at	1		CfaAffx.15900.1.S1_at	1
Gga.16643.1.S1_at	1		RPTR-Cfa-J01347-2_at	1
GgaAffx.22538.1.S1_at	1		Cfa.1706.1.A1_at	1
Gga.2811.1.S1_at	1		Cfa.15110.1.A1_at	1
GgaAffx.26157.1.S1_at	1		Cfa.8943.1.A1_at	1
Gga.13659.1.S1_at	1		CfaAffx.12602.1.S1_at	1
Gga.19442.1.S1_at	1		CfaAffx.28051.1.S1_s_at	1
GgaAffx.21542.1.S1_at	1		CfaAffx.29726.1.S1_at	1
GgaAffx.10330.1.A1_at	1		Cfa.4189.1.A1_at	1
Gga.17567.1.S1_at	1		Cfa.6212.1.A1_at	1
GgaAffx.21356.2.S1_s_at	1		Cfa.2702.1.A1_at	1
Gga.18249.1.S1_at	1		Cfa.8011.1.S1_a_at	1
Gga.9662.2.S1_a_at	1		CfaAffx.18401.1.S1_at	1
Gga.11288.1.S1_at	1		RPTR-Cfa-AJ002682-1_s_at	1
GgaAffx.7090.1.A1_at	1		CfaAffx.1665.1.S1_at	1
Gga.5950.1.S1_x_at	1		Cfa.20143.1.S1_at	1
Gga.17784.1.S1_x_at	1		Cfa.15575.1.A1_at	1
GgaAffx.10043.1.S1_at	1		Cfa.15740.1.A1_at	1
Gga.291.1.S1_at	1		Cfa.13808.1.A1_at	1
Gga.15944.1.A1_at	1		Cfa.12250.1.A1_at	1
Gga.5741.1.S1_at	1		CfaAffx.23627.1.S1_x_at	1
GgaAffx.20263.1.S1_s_at	1		Cfa.15025.1.S1_at	1
Gga.6946.1.A1_at	1		Cfa.14259.1.A1_at	1
Gga.19805.1.S1_at	1		Cfa.5157.1.A1_at	1
Gga.8499.4.S1_a_at	1		Cfa.1238.11.A1_at	1
Gga.13115.1.S1_at	1		CfaAffx.9711.1.S1_at	1
GgaAffx.9791.1.S1_at	1		Cfa.4037.1.S1_at	1
GgaAffx.2909.1.S1_x_at	1		Cfa.1667.1.A1_at	1
Gga.19089.1.S1_at	1		Cfa.15216.1.S1_at	1
Gga.11552.1.S1_at	1		Cfa.8355.1.A1_at	1
Gga.15271.1.S1_at	1		Cfa.6911.1.A1_at	1
Gga.12833.1.A1_at	1		Cfa.5136.1.A1_at	1
GgaAffx.21132.1.S1_s_at	1		Cfa.4797.1.A1_at	1
Gga.16763.1.S1_at	1		Cfa.7407.1.A1_at	1
Gga.12269.1.S1_at	1		Cfa.4716.1.A1_at	1
NC-002641.CDS4.S1_s_at	1		Cfa.10390.1.A1_at	1
GgaAffx.12533.1.S1_at	1		Cfa.13028.1.A1_at	1
Gga.18635.1.S1_at	1		Cfa.12810.1.A1_at	1
Gga.15304.1.S1_at	1		Cfa.1284.1.S1_at	1
GgaAffx.10878.1.S1_at	1		Cfa.5656.1.A1_at	1
Gga.9365.1.A1_at	1		Cfa.7089.1.A1_at	1
Gga.19994.1.S1_at	1		Cfa.10167.1.A1_at	1
GgaAffx.11969.1.S1_at	1		Cfa.12600.1.A1_s_at	1
GgaAffx.3013.1.S1_at	1		Cfa.3729.1.A1_at	1
GgaAffx.21044.1.S1_s_at	1		Cfa.1955.1.S1_at	1
Gga.13274.1.S1_at	1		CfaAffx.9310.1.S1_x_at	1
Gga.13020.1.S1_s_at	1		Cfa.15474.1.S1_at	1
Gga.9434.1.S1_at	1		CfaAffx.762.1.S1_x_at	1
Gga.11136.1.A1_at	1		CfaAffx.11782.1.S1_at	1
GgaAffx.12721.1.S1_at	1		Cfa.5097.1.A1_at	1
Gga.12061.2.S1_at	1		Cfa.2106.1.S1_at	1
Gga.14951.1.S1_at	1		Cfa.12383.1.A1_at	1
Gga.6268.1.S1_at	1		Cfa.3085.1.A1_at	1
Gga.14953.1.A1_at	1		Cfa.13998.1.A1_at	1
Gga.17950.1.A1_at	1		CfaAffx.8811.1.S1_at	1
Gga.12828.1.S1_at	1		Cfa.5690.1.A1_at	1
Gga.16065.1.S1_at	1		Cfa.15476.1.S1_at	1
Gga.18508.1.A1_at	1		Cfa.14930.1.S1_at	1
Gga.19777.1.S1_at	1		Cfa.11960.1.A1_s_at	1
Gga.16919.2.A1_at	1		Cfa.11992.1.A1_at	1
Gga.1029.3.S1_at	1		Cfa.3872.2.S1_x_at	1
Gga.20035.1.A1_at	1		Cfa.11520.1.A1_at	1
Gga.6775.1.A1_at	1		CfaAffx.8312.1.S1_s_at	1
Gga.6293.1.S1_a_at	1		CfaAffx.27075.1.S1_at	1
NC-002188.CDS32.S1_at	1		Cfa.14464.1.S1_at	1
Gga.6891.1.S1_at	1		Cfa.9689.1.S1_at	1
Gga.16244.2.A1_at	1		Cfa.6720.1.A1_at	1
Gga.4491.1.A1_at	1		Cfa.18325.1.S1_at	1
Gga.2345.1.S1_at	1		CfaAffx.8484.1.S1_at	1
RPTR-Gga-M15077-1_s_at	1		Cfa.12252.1.A1_at	1
GgaAffx.21209.1.S1_at	1		Cfa.13824.1.A1_at	1
Gga.6570.1.A1_at	1		CfaAffx.5267.1.S1_s_at	1
Gga.13396.1.S1_s_at	1		CfaAffx.30235.1.S1_s_at	1
Gga.20000.1.S1_at	1		CfaAffx.32026.1.S1_at	1
Gga.10980.2.S1_at	1		Cfa.2089.1.A1_at	1
GgaAffx.11263.1.S1_at	1		Cfa.12629.1.A1_at	1
Gga.4070.1.S1_at	1		Cfa.10071.1.A1_at	1
Gga.15369.1.S1_at	1		Cfa.18874.1.S1_at	1
Gga.12437.1.S1_at	1		Cfa.2712.1.A1_at	1
Gga.20052.1.S1_at	1		Cfa.15711.1.A1_at	1
Gga.10545.1.S1_at	1		CfaAffx.10413.1.S1_at	1
GgaAffx.6427.1.S1_x_at	1		Cfa.13685.1.A1_at	1
Gga.11246.1.S1_at	1		Cfa.12913.1.A1_at	1
GgaAffx.20166.1.S1_s_at	1		CfaAffx.11762.1.S1_s_at	1
GgaAffx.12960.1.S1_at	1		CfaAffx.16857.1.S1_at	1
Gga.19736.1.S1_at	1		Cfa.4760.1.A1_at	1
Gga.13164.1.S1_at	1		Cfa.10869.1.S1_at	1
Gga.10443.1.S1_at	1		CfaAffx.11705.1.S1_at	1
Gga.11185.1.A1_at	1		Cfa.5222.1.A1_at	1
Gga.653.1.S1_at	1		Cfa.8979.1.A1_at	1
Gga.16900.1.S1_at	1		Cfa.4700.1.A1_at	1
Gga.5080.1.S1_at	1		Cfa.7794.1.A1_at	1
GgaAffx.23254.1.S1_at	1		Cfa.3758.1.S1_x_at	1
Gga.5074.1.A1_at	1		Cfa.492.1.A1_at	1
Gga.13936.1.S1_at	1		Cfa.19358.1.S1_s_at	1
Gga.7842.1.S1_at	1		Cfa.10150.1.A1_at	1
Gga.14676.1.S1_at	1		Cfa.5924.1.A1_at	1
GgaAffx.9279.1.A1_at	1		Cfa.4639.1.A1_at	1
Gga.9542.1.S1_at	1		RPTR-Cfa-AJ002682-2_s_at	1
Gga.13109.1.S1_at	1		CfaAffx.26020.1.S1_at	1
GgaAffx.12685.1.S1_s_at	1		CfaAffx.29397.1.S1_s_at	1
Gga.2739.1.S1_at	1		Cfa.15463.1.A1_at	1
Gga.17998.1.S1_at	1		Cfa.10459.1.A1_at	1
Gga.16894.1.S1_at	1		Cfa.931.1.A1_at	1
Gga.14559.1.A1_at	1		Cfa.7875.1.A1_at	1
Gga.11850.2.A1_a_at	1		CfaAffx.16527.1.S1_at	1
Gga.10860.1.A1_at	1		Cfa.6696.1.A1_at	1
NC-002188.CDS130.S1_at	1		Cfa.12469.1.A1_at	1
Gga.7530.1.S1_at	1		Cfa.5435.1.A1_at	1
Gga.16169.1.S1_at	1		Cfa.10295.1.A1_at	1
GgaAffx.9118.1.A1_at	1		Cfa.530.1.S1_at	1
GgaAffx.7621.1.S1_s_at	1		Cfa.12474.1.S1_at	1
GgaAffx.483.2.S1_at	1		Cfa.7485.1.A1_at	1
Gga.942.1.S1_at	1		Cfa.2481.1.S2_at	1
Gga.16009.1.S1_s_at	1		Cfa.1647.1.A1_at	1
Gga.11585.1.S1_at	1		CfaAffx.2625.1.S1_at	1
Gga.13369.1.S1_at	1		Cfa.298.1.S1_x_at	1
Gga.10555.1.A1_at	1		Cfa.1380.1.S1_at	1
Gga.3293.1.S1_s_at	1		Cfa.2766.1.A1_at	1
Gga.19931.1.S1_at	1		Cfa.11984.1.A1_at	1
GgaAffx.7470.1.A1_at	1		Cfa.6463.1.A1_at	1
Gga.3029.1.S1_at	1		Cfa.4442.1.A1_at	1
Gga.16954.1.S1_at	1		Cfa.13100.1.A1_at	1
Gga.18785.1.S1_at	1		Cfa.12525.1.A1_at	1
Gga.16284.1.S1_at	1		Cfa.13426.1.A1_at	1
GgaAffx.11226.1.A1_x_at	1		CfaAffx.22720.1.S1_s_at	1
GgaAffx.11195.1.S1_at	1		Cfa.8083.1.A1_at	1
Gga.15217.1.S1_at	1		CfaAffx.203.1.S1_at	1
Gga.13667.1.S1_at	1		Cfa.1545.1.A1_at	1
Gga.10252.1.S1_at	1		Cfa.8714.1.A1_at	1
Gga.17832.1.S1_at	1		Cfa.7765.1.A1_at	1
Gga.12646.1.A1_at	1		CfaAffx.24514.1.S1_at	1
Gga.11713.1.S1_s_at	1		Cfa.9053.1.A1_at	1
GgaAffx.22194.1.S1_at	1		Cfa.8167.1.S1_at	1
GgaAffx.26403.2.S1_s_at	1		Cfa.13272.1.A1_at	1
Gga.1025.1.S1_at	1		Cfa.19305.1.S1_s_at	1
Gga.17983.1.S1_at	1		Cfa.15585.1.A1_at	1
Gga.16499.1.S1_at	1		Cfa.1032.2.A1_at	1
Gga.9822.1.S1_at	1		CfaAffx.20094.1.S1_at	1
Gga.9222.1.S1_at	1		Cfa.13891.1.A1_at	1
Gga.19657.1.S1_at	1		CfaAffx.14331.1.S1_at	1
Gga.2037.1.S1_at	1		Cfa.12119.1.A1_at	1
Gga.14635.1.A1_at	1		Cfa.10170.1.A1_at	1
GgaAffx.22362.1.S1_at	1		Cfa.9043.1.A1_at	1
Gga.17626.1.A1_at	1		Cfa.16234.1.S1_at	1
Gga.5851.2.A1_a_at	1		Cfa.13807.1.A1_x_at	1
Gga.4145.3.S1_at	1		Cfa.1457.1.S1_at	1
Gga.16437.1.S1_at	1		Cfa.10039.1.A1_at	1
Gga.12147.1.S1_at	1		Cfa.8229.1.A1_at	1
Gga.18853.1.S1_at	1		Cfa.1622.1.A1_at	1
Gga.14178.1.S1_at	1		Cfa.6775.1.A1_at	1
GgaAffx.9216.1.A1_at	1		Cfa.12174.1.A1_at	1
Gga.8215.1.S1_at	1		Cfa.1449.1.S1_at	1
GgaAffx.23839.1.S1_at	1		Cfa.9033.1.A1_at	1
Gga.5632.1.S1_at	1		CfaAffx.21285.1.S1_at	1
Gga.17274.1.S1_at	1		RPTR-Cfa-J01636-1_at	1
Gga.13064.1.S1_at	1		Cfa.13739.1.A1_at	1
Gga.10955.1.S1_at	1		CfaAffx.20118.1.S1_s_at	1
Gga.15052.1.S1_at	1		AFFX-r2-Bs-lys-M_at	1
Gga.18037.1.S1_at	1		Cfa.13422.1.A1_at	1
GgaAffx.20905.1.S1_at	1		Cfa.16860.1.S1_at	1
Gga.13925.1.S1_at	1		Cfa.16748.1.S1_at	1
Gga.11338.1.S1_at	1		Cfa.8466.1.A1_at	1
GgaAffx.162.1.S1_s_at	1		Cfa.17562.1.S1_at	1
Gga.6001.2.S1_a_at	1		Cfa.6931.1.A1_at	1
Gga.11445.1.S1_at	1		CfaAffx.20210.1.S1_s_at	1
Gga.17473.1.S1_at	1		Cfa.2401.1.A1_at	1
GgaAffx.9576.1.S1_at	1		Cfa.15100.1.A1_at	1
GgaAffx.8487.1.S1_at	1		Cfa.6585.1.A1_at	1
GgaAffx.20312.1.S1_at	1		CfaAffx.23719.1.S1_x_at	1
Gga.15585.1.S1_at	1		Cfa.9559.1.A1_at	1
Gga.8612.1.S1_at	1		CfaAffx.29227.1.S1_at	1
Gga.17742.1.S1_at	1		CfaAffx.1568.1.S1_at	1
Gga.14887.1.A1_at	1		Cfa.11731.1.A1_at	1
Gga.11061.1.S1_at	1		CfaAffx.30287.1.S1_at	1
Gga.13212.1.S1_at	1		CfaAffx.10840.1.S1_s_at	1
Gga.3429.1.S1_at	1		CfaAffx.7024.1.S1_s_at	1
Gga.17937.1.S1_at	1		Cfa.11593.1.A1_at	1
GgaAffx.21557.1.S1_at	1		Cfa.4283.1.S1_at	1
Gga.8827.1.S1_at	1		CfaAffx.11129.1.S1_at	1
Gga.8266.1.S1_at	1		CfaAffx.21268.1.S1_at	1
GgaAffx.1526.1.S1_at	1		Cfa.9019.1.A1_at	1
Gga.9056.1.S1_at	1		CfaAffx.15960.1.S1_s_at	1
Gga.6738.1.S1_at	1		Cfa.7420.1.A1_at	1
Gga.16348.1.S1_at	1		Cfa.3037.1.A1_at	1
GgaAffx.12327.1.S1_at	1		Cfa.3597.1.S1_at	1
Gga.16773.1.S1_at	1		Cfa.8050.1.A1_at	1
Gga.15363.1.A1_at	1		Cfa.12885.1.A1_at	1
Gga.1933.4.S1_at	1		CfaAffx.910.1.S1_at	1
Gga.3191.2.S1_a_at	1		CfaAffx.12057.1.S1_at	1
GgaAffx.9193.1.S1_at	1		CfaAffx.24250.1.S1_s_at	1
Gga.18529.1.S1_at	1		CfaAffx.436.1.S1_at	1
GgaAffx.12674.1.S1_at	1		Cfa.5775.1.A1_at	1
Gga.17499.1.S1_at	1		CfaAffx.6753.1.S1_at	1
Gga.17502.1.S1_at	1		Cfa.9531.1.A1_at	1
Gga.19559.1.A1_at	1		CfaAffx.26666.1.S1_at	1
GgaAffx.21713.1.S1_at	1		CfaAffx.16834.1.S1_x_at	1
Gga.15180.1.S1_at	1		Cfa.15371.1.A1_at	1
Gga.4579.1.S1_at	1		CfaAffx.11054.1.S1_at	1
NC-002188.CDS114.S1_at	1		Cfa.5264.1.A1_at	1
GgaAffx.1183.1.A1_at	1		Cfa.18791.1.S1_at	1
Gga.14804.1.A1_at	1		Cfa.6104.1.A1_at	1
Gga.19750.1.S1_at	1		Cfa.13746.1.A1_at	1
Gga.13991.1.S1_at	1		Cfa.13416.1.A1_at	1
Gga.18079.1.A1_at	1		Cfa.19570.1.S1_at	1
Gga.14677.1.A1_at	1		Cfa.1340.1.S1_at	1
GgaAffx.503.1.A1_at	1		Cfa.17830.2.S1_at	1
Gga.18141.1.S1_at	1		CfaAffx.12030.1.S1_at	1
Gga.15527.1.S1_at	1		Cfa.5874.1.A1_at	1
Gga.10355.1.S1_at	1		Cfa.2921.1.S1_at	1
AY510475.CDS45.S1_s_at	1		CfaAffx.21682.1.S1_at	1
Gga.16545.1.S1_at	1		Cfa.7715.1.A1_at	1
Gga.18079.1.S1_at	1		CfaAffx.905.1.S1_at	1
Gga.11823.1.S1_at	1		Cfa.11449.1.A1_at	1
GgaAffx.8774.7.A1_at	1		Cfa.9101.2.A1_at	1
Gga.13333.1.S1_at	1		Cfa.1939.1.S1_at	1
NC-002188.CDS240.S1_at	1		Cfa.16521.1.S1_s_at	1
GgaAffx.21227.1.S1_at	1		Cfa.2076.1.S1_at	1
Gga.66.1.S1_at	1		CfaAffx.24892.1.S1_at	1
Gga.13352.1.A1_at	1		Cfa.13860.1.A1_at	1
GgaAffx.5381.1.S1_at	1		Cfa.4686.1.A1_at	1
Gga.17443.1.S1_at	1		Cfa.2369.1.S1_at	1
Gga.14445.1.S1_s_at	1		Cfa.10856.1.S1_at	1
GgaAffx.12390.1.S1_at	1		Cfa.20055.1.A1_at	1
Gga.7951.1.S1_at	1		Cfa.14964.1.A1_at	1
Gga.8231.1.S1_at	1		Cfa.11396.1.A1_at	1
Gga.18569.1.S1_at	1		CfaAffx.8777.1.S1_at	1
GgaAffx.499.1.S1_at	1		Cfa.17026.1.S1_s_at	1
GgaAffx.25298.2.S1_at	1		Cfa.9600.1.A1_at	1
Gga.6812.1.S1_at	1		Cfa.9773.1.A1_at	1
Gga.6555.1.S1_at	1		Cfa.5809.1.A1_at	1
Gga.6234.1.S1_at	1		Cfa.10418.1.A1_at	1
Gga.18233.1.S1_at	1		Cfa.11353.1.A1_at	1
GgaAffx.20844.1.S1_s_at	1		Cfa.11364.1.A1_at	1
Gga.18446.1.S1_at	1		CfaAffx.26500.1.S1_s_at	1
Gga.16247.1.S1_at	1		CfaAffx.27036.1.S1_at	1
Gga.3109.1.A1_s_at	1		Cfa.6545.1.A1_at	1
Gga.18547.1.S1_at	1		Cfa.4584.1.A1_at	1
GgaAffx.5255.1.S1_at	1		Cfa.8367.1.A1_at	1
Gga.4517.1.S1_at	1		Cfa.16257.1.S1_at	1
Gga.9678.1.S1_at	1		Cfa.18210.1.S1_at	1
Gga.14690.1.S1_at	1		Cfa.422.1.A1_at	1
GgaAffx.981.2.S1_at	1		Cfa.4445.1.S1_at	1
GgaAffx.20292.1.S1_at	1		Cfa.12600.1.A1_x_at	1
GgaAffx.12062.1.S1_s_at	1		Cfa.11977.1.A1_s_at	1
Gga.13908.1.S1_at	1		Cfa.12763.1.A1_at	1
GgaAffx.11082.1.A1_at	1		CfaAffx.506.1.S1_x_at	1
Gga.8788.1.S1_at	1		CfaAffx.11746.1.S1_at	1
AFFX-r2-Bs-lys-M_at	1		CfaAffx.30590.1.S1_at	1
Gga.18061.1.A1_at	1		Cfa.10576.1.A1_at	1
Gga.13963.1.S1_at	1		CfaAffx.27734.1.S1_at	1
GgaAffx.25349.3.S1_at	1		CfaAffx.19130.1.S1_at	1
Gga.19055.1.S1_at	1		Cfa.1925.1.A1_at	1
Gga.14306.1.S1_at	1		Cfa.10716.1.S1_s_at	1
GgaAffx.21362.1.S1_at	1		CfaAffx.10823.1.S1_at	1
Gga.19717.1.S1_at	1		Cfa.8023.1.A1_a_at	1
GgaAffx.20968.1.S1_s_at	1		Cfa.14438.1.A1_at	1
Gga.14660.1.S1_at	1		Cfa.8178.1.A1_at	1
GgaAffx.23686.1.S1_at	1		Cfa.10758.1.S1_s_at	1
Gga.4849.1.S1_at	1		Cfa.1382.1.A1_at	1
Gga.371.1.A1_at	1		CfaAffx.12902.1.S1_s_at	1
Gga.13239.1.S1_at	1		Cfa.1929.1.S1_at	1
Gga.14641.1.S1_at	1		Cfa.2037.1.A1_at	1
GgaAffx.12350.1.A1_at	1		Cfa.7749.1.A1_at	1
Gga.19593.1.S1_at	1		Cfa.11021.1.A1_at	1
Gga.13588.1.A1_at	1		Cfa.10582.1.A1_at	1
GgaAffx.21170.1.S1_at	1		Cfa.12971.1.A1_at	1
GgaAffx.20593.1.S1_at	1		Cfa.7802.1.A1_at	1
Gga.18390.1.S1_at	1		Cfa.2035.1.S1_at	1
Gga.9842.1.S1_at	1		Cfa.14919.1.A1_at	1
Gga.7492.2.S1_a_at	1		Cfa.13298.1.A1_at	1
Gga.16314.1.S1_at	1		Cfa.13222.1.A1_at	1
Gga.10866.1.S1_at	1		Cfa.223.1.S1_at	1
Gga.13404.1.S1_at	1		Cfa.4484.1.S1_at	1
Gga.7356.1.S1_at	1		Cfa.2333.1.S1_a_at	1
Gga.4889.1.S1_at	1		Cfa.13513.1.A1_at	1
Gga.15927.1.S1_at	1		CfaAffx.26384.1.S1_at	1
GgaAffx.25775.1.S1_at	1		Cfa.2889.1.S1_at	1
Gga.8341.1.S1_at	1		CfaAffx.8657.1.S1_at	1
Gga.16869.1.S1_at	1		Cfa.2449.1.A1_at	1
Gga.17972.2.S1_a_at	1		Cfa.18684.1.S1_at	1
Gga.4591.1.S1_at	1		Cfa.8102.1.A1_at	1
GgaAffx.20884.1.S1_at	1		Cfa.13084.1.A1_s_at	1
Gga.1998.1.S1_at	1		CfaAffx.10847.1.S1_at	1
GgaAffx.7763.1.A1_at	1		Cfa.12127.1.A1_at	1
Gga.1517.1.S1_at	1		Cfa.9280.1.A1_at	1
Gga.7146.1.S1_at	1		Cfa.8437.1.A1_at	1
Gga.11677.1.S1_at	1		Cfa.11860.1.A1_at	1
GgaAffx.7555.1.S1_s_at	1		Cfa.3104.1.S1_at	1
Gga.14009.1.S1_at	1		CfaAffx.10276.1.S1_at	1
Gga.19101.1.S1_at	1		Cfa.7398.1.A1_at	1
Gga.17626.1.S1_at	1		Cfa.6693.1.A1_at	1
Gga.14439.1.S1_s_at	1		CfaAffx.26049.1.S1_at	1
Gga.13293.1.S1_at	1		CfaAffx.12421.1.S1_at	1
GgaAffx.6910.1.S1_at	1		Cfa.2994.2.A1_at	1
Gga.19254.1.A1_at	1		Cfa.13885.1.A1_at	1
Gga.14964.1.S1_at	1		Cfa.11678.1.A1_at	1
Gga.6045.1.S1_at	1		Cfa.13211.1.A1_at	1
Gga.14563.1.S1_at	1		Cfa.351.1.A1_at	1
Gga.12239.1.S1_at	1		CfaAffx.224.1.S1_at	1
Gga.10279.1.S1_at	1		Cfa.13205.1.A1_at	1
Gga.14357.1.S1_at	1		Cfa.11277.1.A1_at	1
Gga.14989.1.S1_at	1		CfaAffx.27732.1.S1_at	1
GgaAffx.4065.4.A1_at	1		CfaAffx.28482.1.S1_x_at	1
Gga.6971.2.A1_at	1		Cfa.2396.1.S1_at	1
Gga.5077.1.S1_at	1		Cfa.8686.1.A1_at	1
Gga.8207.1.S1_at	1		Cfa.5936.1.A1_at	1
Gga.17903.1.A1_at	1		CfaAffx.22031.1.S1_at	1
Gga.5717.1.S1_at	1		Cfa.14063.1.A1_at	1
Gga.18804.1.A1_at	1		Cfa.5387.1.A1_at	1
Gga.12145.1.S1_at	1		Cfa.2547.1.S1_at	1
GgaAffx.4503.1.S1_at	1		Cfa.5790.1.A1_at	1
Gga.18977.1.S1_at	1		Cfa.13344.1.A1_at	1
Gga.13669.1.A1_at	1		Cfa.11715.1.A1_at	1
Gga.17826.1.S1_at	1		Cfa.10358.2.S1_s_at	1
Gga.4110.7.S1_s_at	1		Cfa.7303.1.A1_a_at	1
Gga.6347.1.S1_at	1		CfaAffx.449.1.S1_x_at	1
GgaAffx.26349.1.S1_at	1		Cfa.12344.1.A1_at	1
GgaAffx.20661.1.S1_at	1		CfaAffx.903.1.S1_at	1
Gga.18361.1.S1_at	1		Cfa.5902.1.A1_at	1
Gga.18267.1.S1_at	1		CfaAffx.11333.1.S1_at	1
Gga.7582.1.S1_at	1		CfaAffx.19748.1.S1_at	1
GgaAffx.23041.1.S1_s_at	1		Cfa.6823.1.A1_at	1
Gga.13656.1.S1_at	1		Cfa.20824.1.S1_at	1
Gga.19991.1.S1_at	1		CfaAffx.28183.1.S1_at	1
Gga.12271.3.S1_a_at	1		Cfa.16221.1.S1_at	1
GgaAffx.22463.1.S1_at	1		Cfa.13329.1.A1_at	1
Gga.8291.1.S1_at	1		Cfa.10128.1.A1_at	1
Gga.19968.1.S1_at	1		Cfa.7735.1.A1_at	1
Gga.14343.1.S1_at	1		Cfa.7577.1.A1_at	1
Gga.14697.1.S1_at	1		CfaAffx.13007.1.S1_s_at	1
Gga.19621.1.S1_at	1		CfaAffx.8276.1.S1_s_at	1
NC-001427.CDS1.S1_at	1		Cfa.10115.1.A1_at	1
Gga.9923.1.S1_at	1		CfaAffx.11991.1.S1_at	1
Gga.9405.1.A1_at	1		Cfa.14018.1.A1_at	1
GgaAffx.24215.1.S1_at	1		CfaAffx.21056.1.S1_at	1
Gga.15258.1.A1_at	1		Cfa.13442.1.A1_at	1
Gga.16849.1.S1_at	1		Cfa.12226.1.A1_at	1
Gga.15637.1.S1_at	1		Cfa.14652.2.S1_s_at	1
Gga.11669.1.S1_at	1		CfaAffx.25825.1.S1_at	1
Gga.18997.1.A1_at	1		Cfa.6070.1.S1_at	1
Gga.13617.1.A1_at	1		Cfa.3407.1.S1_at	1
Gga.10735.1.S1_at	1		Cfa.14024.1.A1_at	1
Gga.10846.1.S1_at	1		Cfa.12526.1.A1_at	1
Gga.9088.1.S1_at	1		Cfa.2176.1.A1_at	1
Gga.5875.2.A1_at	1		Cfa.3152.1.S1_at	1
Gga.13936.1.A1_at	1		Cfa.14771.1.A1_at	1
Gga.6050.1.S1_at	1		Cfa.5077.1.A1_at	1
Gga.19013.1.S1_at	1		CfaAffx.3127.1.S1_at	1
Gga.15547.1.S1_at	1		CfaAffx.19009.1.S1_at	1
Gga.18348.1.S1_at	1		Cfa.13924.1.A1_x_at	1
Gga.10903.1.A1_at	1		Cfa.14382.1.A1_at	1
Gga.10585.1.S1_at	1		AFFX-TrpnX-5_at	1
Gga.10372.1.S1_at	1		Cfa.1885.1.A1_at	1
GgaAffx.2903.1.S1_at	1		Cfa.7192.1.A1_at	1
Gga.5351.1.S1_s_at	1		Cfa.15334.1.S1_at	1
GgaAffx.21183.1.S1_s_at	1		Cfa.16679.1.A1_at	1
Gga.7383.1.S1_at	1		Cfa.11601.1.A1_at	1
Gga.12809.1.S1_at	1		CfaAffx.31069.1.S1_s_at	1
Gga.15797.1.S1_at	1		Cfa.2643.1.A1_at	1
NC-002641.CDS1.S1_s_at	1		Cfa.6881.1.A1_at	1
Gga.11321.1.S1_at	1		Cfa.4382.1.A1_at	1
Gga.5086.1.S1_at	1		CfaAffx.27845.1.S1_at	1
GgaAffx.7417.1.S1_at	1		Cfa.7320.1.A1_at	1
Gga.15644.1.S1_at	1		Cfa.1842.1.S1_at	1
Gga.10542.1.S1_at	1		Cfa.17691.1.S1_at	1
GgaAffx.20957.1.S1_at	1		Cfa.11918.1.A1_at	1
Gga.1709.2.S1_s_at	1		Cfa.19349.1.S1_at	1
GgaAffx.20238.1.S1_at	1		Cfa.14564.2.S1_at	1
Gga.13912.1.A1_at	1		Cfa.10504.2.S1_at	1
Gga.11301.1.S1_at	1		Cfa.6380.1.A1_at	1
GgaAffx.2702.1.S1_at	1		CfaAffx.969.1.S1_at	1
GgaAffx.20631.1.S1_at	1		Cfa.9789.1.A1_at	1
Gga.14534.1.S1_at	1		CfaAffx.656.1.S1_x_at	1
Gga.15661.1.S1_at	1		Cfa.12349.1.A1_s_at	1
Gga.4964.58.A1_x_at	1		CfaAffx.27215.1.S1_at	1
Gga.16438.1.S1_at	1		CfaAffx.28892.1.S1_at	1
Gga.16304.2.S1_at	1		Cfa.6870.1.A1_at	1
Gga.7581.1.S1_at	1		Cfa.8808.1.A1_at	1
Gga.18611.1.A1_at	1		Cfa.5477.1.A1_at	1
GgaAffx.6423.2.S1_at	1		CfaAffx.19559.1.S1_at	1
Gga.17520.1.S1_at	1		Cfa.9660.1.A1_at	1
Gga.11744.1.S1_at	1		Cfa.5235.1.A1_s_at	1
Gga.14626.1.S1_at	1		Cfa.21266.1.S1_at	1
GgaAffx.21369.1.S1_at	1		Cfa.5473.1.A1_at	1
GgaAffx.21044.1.S1_at	1		Cfa.15671.1.A1_at	1
GgaAffx.12246.1.S1_s_at	1		AFFX-BioC-3_at	1
Gga.14681.1.S1_at	1		Cfa.3106.1.A1_at	1
NC-002617.CDS4.S1_at	1		Cfa.13760.1.A1_at	1
GgaAffx.1260.1.S1_at	1		CfaAffx.12045.1.S1_at	1
GgaAffx.5429.1.S1_at	1		Cfa.16023.1.S1_at	1
Gga.19555.1.S1_at	1		Cfa.10344.2.S1_at	1
Gga.15648.1.S1_at	1		Cfa.14684.1.A1_s_at	1
Gga.10219.1.A1_at	1		Cfa.12166.1.A1_at	1
GgaAffx.20620.1.S1_at	1		Cfa.18747.1.S1_at	1
Gga.16848.2.S1_a_at	1		Cfa.12339.1.A1_at	1
GgaAffx.20819.1.S1_at	1		Cfa.3384.1.A1_at	1
GgaAffx.11815.1.S1_at	1		CfaAffx.25266.1.S1_at	1
Gga.2479.1.S1_at	1		Cfa.1948.1.A1_at	1
GgaAffx.6546.1.S1_at	1		Cfa.5655.1.A1_at	1
Gga.11411.1.A1_at	1		Cfa.13338.2.A1_s_at	1
GgaAffx.12752.1.S1_at	1		Cfa.13528.1.A1_at	1
Gga.8326.1.S1_at	1		Cfa.8177.1.A1_at	1
Gga.285.1.A1_at	1		CfaAffx.21431.1.S1_at	1
Gga.18892.1.S1_s_at	1		Cfa.4981.1.A1_at	1
Gga.19797.1.A1_at	1		CfaAffx.21046.1.S1_at	1
Gga.19721.1.S1_at	1		Cfa.8849.1.A1_at	1
Gga.2622.1.S1_at	1		CfaAffx.628.1.S1_x_at	1
GgaAffx.8530.1.S1_at	1		Cfa.10253.1.S1_s_at	1
Gga.19489.1.A1_at	1		Cfa.7060.1.A1_s_at	1
Gga.18623.1.A1_at	1		Cfa.5283.1.A1_at	1
Gga.17743.1.S1_at	1		Cfa.8169.1.A1_at	1
Gga.18689.1.A1_at	1		Cfa.20675.1.A1_at	1
Gga.16155.1.S1_at	1		Cfa.9736.1.A1_at	1
Gga.19845.1.S1_at	1		Cfa.7084.1.A1_at	1
GgaAffx.2466.1.S1_at	1		CfaAffx.826.1.S1_at	1
Gga.18283.1.A1_at	1		Cfa.8967.1.A1_at	1
GgaAffx.5154.1.S1_s_at	1		Cfa.14647.1.A1_at	1
Gga.8271.1.S1_at	1		Cfa.3284.1.S1_s_at	1
GgaAffx.12336.1.S1_s_at	1		Cfa.5915.1.A1_at	1
Gga.593.1.S1_s_at	1		Cfa.11413.1.A1_at	1
GgaAffx.21536.1.S1_at	1		Cfa.15776.1.A1_at	1
Gga.16953.1.S1_s_at	1		Cfa.12761.1.A1_at	1
GgaAffx.11793.1.S1_s_at	1		Cfa.1532.1.S1_at	1
NC-005264.CDS66.S1_at	1		Cfa.8004.1.A1_at	1
Gga.19851.1.S1_at	1		Cfa.12646.1.A1_at	1
Gga.10769.1.S1_at	1		Cfa.7152.1.A1_at	1
GgaAffx.10449.1.A1_at	1		Cfa.12962.1.A1_at	1
Gga.1965.1.S1_at	1		Cfa.14559.1.A1_at	1
GgaAffx.9453.1.A1_at	1		CfaAffx.17290.1.S1_s_at	1
Gga.10164.1.S1_at	1		Cfa.148.1.A1_at	1
GgaAffx.4182.1.S1_at	1		CfaAffx.53.1.S1_at	1
Gga.6602.1.S1_at	1		Cfa.3226.1.S1_s_at	1
GgaAffx.23705.3.S1_at	1		CfaAffx.10917.1.S1_at	1
Gga.19180.1.S1_s_at	1		CfaAffx.771.1.S1_at	1
NC-001451.CDS6.S1_at	1		Cfa.8103.1.A1_at	1
GgaAffx.13150.1.S1_s_at	1		CfaAffx.4118.1.S1_at	1
Gga.14762.1.A1_at	1		CfaAffx.14645.1.S1_at	1
Gga.1449.1.S1_a_at	1		Cfa.1544.1.A1_at	1
Gga.13951.1.A1_at	1		Cfa.2611.1.A1_at	1
GgaAffx.12553.1.S1_at	1		Cfa.1507.1.A1_at	1
Gga.7673.2.S1_at	1		Cfa.14615.1.A1_at	1
Gga.18193.1.S1_at	1		Cfa.2665.1.A1_at	1
Gga.17045.1.S1_at	1		Cfa.19818.1.S1_at	1
Gga.14538.1.S1_at	1		Cfa.12116.1.A1_at	1
Gga.9210.1.S1_at	1		Cfa.12914.1.A1_at	1
Gga.13645.1.A1_at	1		Cfa.9334.1.A1_at	1
Gga.18202.1.S1_at	1		Cfa.10727.1.A1_at	1
Gga.10184.1.S1_at	1		Cfa.7128.1.A1_at	1
Gga.6364.1.S1_at	1		Cfa.2180.1.A1_at	1
Gga.2387.1.S1_s_at	1		Cfa.16112.1.A1_at	1
Gga.18265.1.A1_at	1		Cfa.1393.1.A1_at	1
Gga.7837.1.S1_at	1		Cfa.11081.1.S1_at	1
Gga.12987.1.S1_at	1		Cfa.9109.1.A1_at	1
Gga.9574.1.S1_at	1		Cfa.4598.1.A1_at	1
GgaAffx.23793.1.S1_at	1		Cfa.12636.1.A1_at	1
Gga.19517.1.S1_at	1		CfaAffx.541.1.S1_s_at	1
Gga.19177.2.S1_at	1		Cfa.399.3.S1_at	1
Gga.12079.2.S1_a_at	1		Cfa.8192.1.A1_at	1
Gga.10749.1.A1_at	1		Cfa.1289.1.A1_at	1
GgaAffx.6054.1.S1_at	1		Cfa.6085.1.A1_at	1
Gga.6082.1.S1_at	1		Cfa.20492.1.S1_at	1
Gga.17525.1.S1_at	1		Cfa.1738.1.A1_at	1
GgaAffx.22670.2.S1_s_at	1		Cfa.14347.2.A1_at	1
Gga.7405.1.S1_at	1		CfaAffx.5350.1.S1_at	1
Gga.18174.1.S1_at	1		Cfa.1695.1.S1_at	1
NC-002188.CDS12.S1_at	1		Cfa.9688.1.A1_at	1
Gga.15123.1.A1_at	1		Cfa.4701.1.A1_at	1
Gga.7740.1.S1_a_at	1		Cfa.5524.1.A1_at	1
GgaAffx.21141.1.S1_s_at	1		Cfa.2925.1.A1_at	1
GgaAffx.3664.1.A1_at	1		Cfa.20401.1.S1_at	1
Gga.11343.1.S1_at	1		CfaAffx.29493.1.S1_at	1
Gga.19677.1.S1_at	1		Cfa.19489.1.S1_at	1
Gga.17450.1.A1_at	1		CfaAffx.3215.1.S1_at	1
Gga.19123.1.S1_at	1		CfaAffx.16707.1.S1_at	1
Gga.13733.1.A1_at	1		Cfa.10557.1.A1_at	1
NC-000899.CDS12.S1_at	1		Cfa.6704.1.A1_at	1
Gga.10719.1.S1_at	1		Cfa.14132.1.A1_at	1
Gga.10562.1.S1_at	1		Cfa.7803.1.A1_at	1
Gga.17909.1.S1_at	1		Cfa.6681.1.A1_at	1
Gga.11202.1.S1_at	1		Cfa.7031.1.A1_at	1
Gga.765.1.A1_at	1		Cfa.2018.1.S1_at	1
Gga.6213.2.S1_at	1		Cfa.1981.1.S1_at	1
Gga.5045.1.S1_at	1		CfaAffx.30706.1.S1_at	1
Gga.14269.1.S1_at	1		Cfa.7054.1.A1_at	1
Gga.509.1.S1_at	1		Cfa.5061.1.A1_at	1
Gga.2688.1.S1_at	1		Cfa.8908.1.A1_at	1
Gga.13699.1.A1_at	1		CfaAffx.30916.1.S1_at	1
Gga.16411.1.S1_at	1		Cfa.10185.1.A1_at	1
Gga.4934.1.S1_at	1		Cfa.205.1.A1_at	1
Gga.16328.1.S1_at	1		Cfa.4777.1.A1_at	1
Gga.14769.1.A1_at	1		Cfa.13825.1.A1_at	1
Gga.13844.1.S1_s_at	1		Cfa.6225.1.A1_at	1
Gga.130.1.S1_at	1		Cfa.7114.1.A1_at	1
Gga.1159.1.S1_at	1		Cfa.10770.2.S1_at	1
Gga.4300.1.S1_at	1		Cfa.11093.1.S1_at	1
GgaAffx.8671.1.S1_at	1		Cfa.3810.1.S1_at	1
Gga.19635.1.S1_at	1		Cfa.1820.1.S1_at	1
Gga.17974.1.S1_at	1		Cfa.4527.1.A1_at	1
Gga.12172.1.A1_x_at	1		Cfa.11371.1.A1_at	1
Gga.10565.1.S1_at	1		Cfa.11407.1.A1_at	1
Gga.6665.1.A1_at	1		Cfa.14728.1.A1_s_at	1
AY510475.CDS87.S1_s_at	1		Cfa.15768.1.A1_at	1
GgaAffx.22408.1.S1_at	1		Cfa.14884.1.A1_at	1
GgaAffx.2949.1.S1_at	1		Cfa.12435.1.A1_at	1
Gga.15591.1.S1_at	1		Cfa.11668.1.A1_at	1
Gga.13648.1.S1_at	1		CfaAffx.14131.1.S1_at	1
GgaAffx.20897.1.S1_s_at	1		Cfa.7532.1.A1_a_at	1
Gga.7698.1.S1_at	1		Cfa.3271.1.S1_at	1
AFFX-TrpnX-5_at	1		CfaAffx.21384.1.S1_s_at	1
Gga.15624.1.S1_at	1		CfaAffx.12886.1.S1_at	1
Gga.12867.1.S1_at	1		Cfa.9742.1.A1_at	1
Gga.18649.1.S1_at	1		Cfa.19764.1.S1_at	1
Gga.5893.2.S1_a_at	1		Cfa.9314.1.A1_at	1
GgaAffx.9157.1.S1_at	1		Cfa.14916.1.A1_at	1
GgaAffx.20863.1.S1_s_at	1		Cfa.3238.1.S1_at	1
GgaAffx.7039.1.S1_at	1		Cfa.14062.1.A1_s_at	1
GgaAffx.6850.1.S1_at	1		Cfa.632.1.A1_at	1
Gga.2733.1.S1_at	1		Cfa.15825.1.S1_x_at	1
Gga.19851.1.A1_at	1		CfaAffx.4562.1.S1_at	1
Gga.19979.1.A1_at	1		Cfa.12280.1.A1_at	1
Gga.1921.2.S1_at	1		Cfa.8766.1.A1_at	1
GgaAffx.11033.1.S1_at	1		Cfa.15690.1.A1_at	1
GgaAffx.20613.1.S1_at	1		Cfa.3664.1.S1_s_at	1
Gga.292.1.S1_at	1		Cfa.2466.1.S1_at	1
Gga.10697.1.A1_at	1		Cfa.1249.1.S1_at	1
Gga.18684.1.S1_at	1		Cfa.12087.1.A1_at	1
GgaAffx.291.1.S1_at	1		Cfa.11119.1.A1_at	1
Gga.5075.1.S1_at	1		RPTR-Cfa-A12338-1_at	1
GgaAffx.1996.1.S1_at	1		CfaAffx.14675.1.S1_s_at	1
GgaAffx.11897.1.S1_at	1		Cfa.11471.1.A1_at	1
Gga.14661.1.A1_at	1		Cfa.12467.2.A1_a_at	1
NC-005264.CDS1.S1_at	1		Cfa.10171.1.A1_at	1
Gga.7647.1.S1_a_at	1		Cfa.11282.1.A1_at	1
GgaAffx.24937.1.S1_at	1		CfaAffx.6708.1.S1_at	1
Gga.16804.1.S1_at	1		CfaAffx.26074.1.S1_at	1
Gga.12510.1.S1_at	1		CfaAffx.2302.1.S1_at	1
GgaAffx.1501.7.S1_s_at	1		Cfa.7069.1.A1_at	1
Gga.8797.1.S1_at	1		Cfa.5602.1.A1_at	1
Gga.18529.1.A1_at	1		CfaAffx.6783.1.S1_at	1
GgaAffx.5701.1.A1_at	1		Cfa.619.1.A1_at	1
GgaAffx.21061.1.S1_at	1		Cfa.4322.1.A1_at	1
Gga.16403.1.S1_at	1		Cfa.3036.1.S1_at	1
RPTR-Gga-U43284-1_s_at	1		CfaAffx.564.1.S1_x_at	1
NC-002641.CDS68.S1_at	1		Cfa.7296.1.A1_at	1
GgaAffx.10458.1.S1_at	1		Cfa.10549.1.A1_at	1
Gga.4696.1.S1_at	1		Cfa.8623.1.A1_at	1
RPTR-Gga-NC_001669-1_at	1		Cfa.12209.1.A1_a_at	1
Gga.17706.1.S1_at	1		Cfa.7771.1.A1_at	1
Gga.16750.1.A1_at	1		Cfa.5637.1.A1_at	1
GgaAffx.11874.1.S1_at	1		Cfa.2251.1.A1_at	1
Gga.7982.1.S1_at	1		Cfa.1267.2.S1_at	1
Gga.6941.1.S1_at	1		Cfa.11710.1.A1_at	1
Gga.6330.3.A1_at	1		Cfa.5687.1.A1_at	1
Gga.3237.1.S1_at	1		CfaAffx.21599.1.S1_s_at	1
Gga.19139.1.S1_at	1		CfaAffx.12287.1.S1_at	1
AB112960.CDS1.S1_at	1		Cfa.14427.1.A1_at	1
GgaAffx.21579.1.S1_s_at	1		CfaAffx.29820.1.S1_s_at	1
Gga.17907.1.S1_at	1		CfaAffx.29100.1.S1_at	1
Gga.6862.1.A1_at	1		Cfa.11263.1.A1_at	1
Gga.11151.1.S1_at	1		Cfa.5356.1.A1_at	1
GgaAffx.4144.3.S1_s_at	1		Cfa.4201.1.A1_at	1
GgaAffx.11431.1.S1_at	1		Cfa.340.1.A1_at	1
Gga.70.1.S1_at	1		Cfa.5486.1.A1_at	1
Gga.17681.1.A1_at	1		Cfa.13842.1.A1_at	1
Gga.10385.1.S1_at	1		Cfa.133.1.A1_at	1
Gga.6407.1.S1_at	1		CfaAffx.27064.1.S1_at	1
Gga.19930.1.S1_at	1		Cfa.6287.1.A1_at	1
Gga.5482.3.S1_s_at	1		CfaAffx.5097.1.S1_at	1
Gga.19925.1.A1_at	1		Cfa.5348.1.A1_at	1
NC-002188.CDS69.S1_at	1		Cfa.3182.1.A1_at	1
Gga.18285.1.A1_at	1		Cfa.4742.1.A1_at	1
AFFX-BioC-3_at	1		Cfa.7204.1.S1_at	1
Gga.15164.1.A1_at	1		Cfa.6624.1.A1_at	1
GgaAffx.2733.1.S1_at	1		AFFX-Cfa-r2-Bs-lys-M_at	1
Gga.2654.1.S1_at	1		Cfa.10056.1.A1_at	1
Gga.13174.1.S1_at	1		Cfa.6107.1.A1_at	1
Gga.12717.1.S1_at	1		Cfa.5240.1.A1_at	1
Gga.684.1.S1_at	1		Cfa.4789.1.A1_at	1
Gga.4994.1.A1_x_at	1		Cfa.13184.1.A1_at	1
GgaAffx.23226.1.S1_at	1		Cfa.9399.1.A1_at	1
Gga.8479.1.S2_at	1		CfaAffx.24872.1.S1_at	1
Gga.9538.1.A1_at	1		CfaAffx.12968.1.S1_x_at	1
Gga.17504.1.S1_at	1		CfaAffx.6833.1.S1_at	1
Gga.18575.1.S1_s_at	1		Cfa.19802.1.S1_at	1
Gga.5108.1.S1_at	1		Cfa.2028.1.S1_at	1
Gga.7214.1.S1_at	1		Cfa.4607.1.A1_at	1
NC-002641.CDS39.S1_at	1		Cfa.9770.1.A1_at	1
Gga.11527.1.S1_at	1		Cfa.7507.1.A1_at	1
GgaAffx.11141.1.A1_at	1		Cfa.447.1.S1_at	1
Gga.17132.1.S1_at	1		Cfa.19947.1.A1_at	1
Gga.4782.1.S1_a_at	1		Cfa.1307.1.S1_at	1
Gga.15979.1.S1_at	1		Cfa.2380.1.A1_at	1
GgaAffx.25147.2.S1_s_at	1		Cfa.20059.1.A1_at	1
Gga.18129.1.S1_at	1		Cfa.197.1.S1_at	1
GgaAffx.22695.1.S1_at	1		Cfa.12736.1.A1_at	1
Gga.7999.1.S1_at	1		CfaAffx.12776.1.S1_at	1
Gga.16993.1.S1_at	1		Cfa.4635.1.A1_at	1
GgaAffx.20160.2.A1_at	1		CfaAffx.7596.1.S1_s_at	1
Gga.17152.1.S1_at	1		CfaAffx.18218.1.S1_at	1
Gga.19574.1.S1_at	1		Cfa.8350.2.A1_x_at	1
Gga.18056.1.A1_at	1		Cfa.6757.1.A1_at	1
Gga.13718.1.A1_at	1		Cfa.13903.1.A1_at	1
Gga.12432.1.S1_at	1		Cfa.9201.1.A1_at	1
Gga.17279.1.S1_at	1		CfaAffx.16223.1.S1_at	1
Gga.18624.1.S1_at	1		Cfa.15276.1.A1_at	1
Gga.18654.1.S1_at	1		CfaAffx.31253.1.S1_at	1
Gga.2792.1.S1_at	1		Cfa.4583.1.A1_at	1
GgaAffx.1468.1.S1_at	1		Cfa.14377.1.S1_at	1
Gga.6912.1.S1_at	1		Cfa.10206.1.A1_at	1
Gga.1867.1.S1_s_at	1		Cfa.13703.1.A1_at	1
GgaAffx.699.1.S1_at	1		Cfa.11884.1.A1_at	1
Gga.4714.1.S1_at	1		Cfa.7837.1.A1_at	1
GgaAffx.12752.1.S1_s_at	1		Cfa.10947.1.S1_at	1
Gga.12730.1.S1_at	1		CfaAffx.28982.1.S1_at	1
Gga.11708.1.S1_at	1		CfaAffx.11590.1.S1_at	1
GgaAffx.21290.1.S1_at	1		Cfa.2242.1.A1_at	1
Gga.10297.2.A1_at	1		Cfa.14331.1.A1_at	1
GgaAffx.6777.1.A1_at	1		Cfa.6021.1.A1_at	1
NC-000899.CDS23.S1_at	1		CfaAffx.25623.1.S1_at	1
Gga.7262.2.S1_at	1		Cfa.14742.1.A1_at	1
Gga.6744.1.S1_at	1		Cfa.7142.1.A1_at	1
Gga.7027.1.S1_at	1		Cfa.14411.1.S1_at	1
GgaAffx.21372.1.S1_s_at	1		Cfa.1121.1.S1_at	1
Gga.8730.1.S1_x_at	1		CfaAffx.27452.1.S1_at	1
GgaAffx.1931.1.S1_at	1		CfaAffx.708.1.S1_s_at	1
Gga.11916.1.S1_at	1		Cfa.13713.1.A1_at	1
GgaAffx.9685.1.S1_at	1		Cfa.1237.1.S1_at	1
GgaAffx.21368.1.S1_at	1		CfaAffx.580.1.S1_at	1
Gga.464.2.A1_at	1		Cfa.5801.1.A1_at	1
Gga.15812.1.S1_at	1		Cfa.2558.1.A1_at	1
Gga.11875.1.S1_at	1		Cfa.7769.1.A1_at	1
Gga.17163.1.S1_at	1		Cfa.13337.1.A1_at	1
GgaAffx.2487.1.A1_at	1		Cfa.9676.1.S1_at	1
Gga.17737.1.A1_at	1		Cfa.5911.1.A1_at	1
GgaAffx.12742.1.S1_at	1		Cfa.14628.1.A1_at	1
Gga.17349.1.S1_at	1		CfaAffx.918.1.S1_x_at	1
Gga.6233.1.S1_at	1		Cfa.612.1.A1_at	1
Gga.4841.2.S1_a_at	1		Cfa.8700.1.S1_at	1
Gga.13621.1.A1_at	1		Cfa.5678.1.A1_at	1
Gga.10854.1.A1_at	1		Cfa.13106.1.A1_x_at	1
Gga.13961.2.S1_a_at	1		CfaAffx.32062.1.S1_at	1
GgaAffx.11398.1.S1_s_at	1		Cfa.1275.1.A1_at	1
GgaAffx.10834.1.A1_at	1		Cfa.12504.1.A1_at	1
GgaAffx.20873.1.S1_at	1		Cfa.4725.1.S1_at	1
Gga.18376.1.S1_at	1		Cfa.16307.1.S1_at	1
Gga.10642.1.A1_at	1		Cfa.6388.1.A1_a_at	1
Gga.3193.1.S1_at	1		Cfa.5216.1.A1_at	1
Gga.13099.1.S1_at	1		Cfa.16166.1.S1_at	1
Gga.1520.1.S1_at	1		Cfa.1562.1.A1_at	1
Gga.14276.1.S1_at	1		CfaAffx.24896.1.S1_at	1
Gga.4162.1.S1_at	1		CfaAffx.29794.1.S1_at	1
Gga.14341.1.S1_at	1		Cfa.10778.1.A1_at	1
Gga.12644.2.S1_x_at	1		CfaAffx.11654.1.S1_at	1
AY562989.CDS2.S1_at	1		Cfa.8095.1.A1_at	1
GgaAffx.1321.1.S1_s_at	1		Cfa.5842.1.A1_at	1
Gga.7574.1.S1_at	1		Cfa.1988.1.S1_at	1
Gga.4018.1.S1_at	1		Cfa.927.2.A1_a_at	1
GgaAffx.21475.1.S1_at	1		Cfa.4634.1.A1_at	1
Gga.18903.1.S1_at	1		Cfa.15414.1.A1_at	1
Gga.16286.1.S1_s_at	1		CfaAffx.8150.1.S1_s_at	1
Gga.13965.1.A1_at	1		CfaAffx.4654.1.S1_s_at	1
GgaAffx.8527.1.S1_at	1		Cfa.7341.1.A1_at	1
Gga.4533.6.A1_at	1		Cfa.5506.1.A1_at	1
Gga.11665.1.S1_at	1		Cfa.19310.1.S1_at	1
NC-002188.CDS5.S1_s_at	1		CfaAffx.32030.1.S1_at	1
Gga.18256.1.A1_at	1		CfaAffx.11879.1.S1_at	1
GgaAffx.20892.1.S1_at	1		CfaAffx.31018.1.S1_at	1
Gga.4567.4.A1_at	1		Cfa.13725.1.A1_at	1
Gga.17756.1.A1_at	1		Cfa.7281.2.S1_at	1
GgaAffx.3721.1.S1_at	1		Cfa.3021.1.A1_at	1
GgaAffx.6807.1.S1_at	1		Cfa.9085.1.A1_at	1
Gga.15789.1.S1_at	1		Cfa.8820.1.A1_at	1
Gga.5320.1.S1_at	1		Cfa.6306.1.A1_at	1
NC-002641.CDS36.S1_at	1		Cfa.15278.1.A1_at	1
Gga.18363.1.A1_at	1		Cfa.11450.1.A1_at	1
Gga.15994.1.S1_at	1		CfaAffx.570.1.S1_at	1
Gga.14477.1.S1_at	1		Cfa.19150.2.S1_at	1
Gga.17958.1.A1_at	1		Cfa.18857.1.S1_at	1
Gga.16613.1.S1_at	1		Cfa.6787.1.A1_at	1
Gga.14539.1.S1_at	1		Cfa.6967.1.A1_at	1
Gga.13532.1.S1_at	1		CfaAffx.18105.1.S1_s_at	1
Gga.19898.1.A1_at	1		Cfa.18018.1.A1_at	1
Gga.12718.1.S1_at	1		Cfa.10919.1.A1_at	1
GgaAffx.20388.1.S1_at	1		Cfa.3674.1.A1_at	1
GgaAffx.10072.2.S1_s_at	1		Cfa.4207.1.S1_at	1
Gga.16517.1.S1_at	1		Cfa.6721.1.A1_at	1
Gga.12872.1.S1_at	1		Cfa.13932.1.A1_at	1
Gga.12694.1.S1_at	1		Cfa.7685.1.A1_at	1
Gga.4574.1.S1_at	1		Cfa.6755.1.A1_at	1
Gga.14202.1.S1_at	1		Cfa.2040.1.S1_at	1
Gga.11161.1.S1_at	1		Cfa.6690.1.A1_at	1
GgaAffx.2806.1.S1_at	1		Cfa.10600.1.A1_at	1
GgaAffx.24090.1.A1_at	1		CfaAffx.17442.1.S1_s_at	1
Gga.7984.1.S1_at	1		Cfa.8318.1.A1_at	1
Gga.17511.1.S1_at	1		Cfa.1008.1.A1_s_at	1
GgaAffx.11680.1.S1_at	1		Cfa.6551.1.A1_at	1
Gga.19841.1.A1_at	1		Cfa.17220.1.S1_s_at	1
Gga.16929.1.S1_at	1		Cfa.87.1.A1_at	1
Gga.12242.2.S1_at	1		Cfa.10917.1.A1_at	1
GgaAffx.21281.1.S1_at	1		Cfa.13188.1.A1_at	1
Gga.17080.1.S1_at	1		Cfa.19405.1.S1_at	1
Gga.11781.1.S1_at	1		Cfa.9381.1.A1_at	1
Gga.2362.1.S1_s_at	1		Cfa.2802.1.S1_at	1
Gga.15242.1.S1_at	1		CfaAffx.14389.1.S1_at	1
Gga.10193.1.S1_at	1		Cfa.5186.1.A1_at	1
GgaAffx.3079.1.S1_at	1		Cfa.10565.1.A1_at	1
Gga.18702.1.A1_at	1		Cfa.2325.1.S1_at	1
Gga.6366.1.S1_at	1		Cfa.5217.1.A1_at	1
GgaAffx.6829.1.S1_at	1		Cfa.5050.1.S1_at	1
Gga.7994.1.S1_at	1		Cfa.12381.1.A1_at	1
Gga.2666.1.S1_at	1		Cfa.4600.1.A1_at	1
Gga.13602.1.A1_at	1		Cfa.4945.1.A1_at	1
GgaAffx.4731.1.A1_at	1		Cfa.16107.1.S1_at	1
Gga.10495.1.S1_at	1		Cfa.14488.1.A1_at	1
NC-002641.CDS6.S1_at	1		Cfa.10510.1.A1_at	1
Gga.17027.1.S1_at	1		Cfa.13326.1.A1_at	1
Gga.13750.1.S1_at	1		Cfa.21301.1.S1_at	1
Gga.18577.1.S1_at	1		Cfa.5246.1.A1_at	1
Gga.10605.1.S1_at	1		Cfa.599.1.S1_at	1
Gga.9273.1.S1_at	1		CfaAffx.13903.1.S1_a_at	1
Gga.9924.1.S1_at	1		CfaAffx.1031.1.S1_at	1
Gga.14126.1.S1_at	1		Cfa.3952.1.S1_at	1
Gga.15938.1.S1_at	1		Cfa.1845.1.A1_at	1
Gga.4567.4.S1_x_at	1		Cfa.8179.1.A1_at	1
Gga.17486.1.S1_at	1		Cfa.1968.1.S1_at	1
Gga.1535.1.S1_a_at	1		CfaAffx.19707.1.S1_at	1
Gga.14617.1.S1_at	1		Cfa.4649.1.A1_at	1
Gga.3266.1.S1_at	1		Cfa.7108.1.S1_at	1
Gga.19730.1.A1_at	1		Cfa.12958.1.A1_at	1
Gga.17323.1.S1_at	1		CfaAffx.9301.1.S1_at	1
Gga.17980.1.S1_at	1		Cfa.5789.1.A1_at	1
Gga.13261.1.S1_at	1		Cfa.1406.1.S1_a_at	1
GgaAffx.12987.1.S1_at	1		Cfa.10496.1.S1_s_at	1
Gga.7900.2.A1_at	1		Cfa.11326.1.A1_at	1
Gga.7734.1.A1_at	1		Cfa.1945.2.A1_at	1
NC-001427.CDS4.S1_at	1		CfaAffx.683.1.S1_s_at	1
Gga.17844.1.S1_at	1		Cfa.19775.1.S1_at	1
Gga.15625.1.S1_at	1		CfaAffx.644.1.S1_s_at	1
GgaAffx.12846.1.S1_at	1		Cfa.5597.1.A1_s_at	1
Gga.17189.1.S1_at	1		Cfa.14902.1.A1_at	1
Gga.11796.1.S1_a_at	1		Cfa.6800.1.A1_a_at	1
Gga.19864.1.S1_at	1		Cfa.6127.1.A1_at	1
GgaAffx.244.1.S1_x_at	1		Cfa.12507.1.A1_at	1
GgaAffx.9527.1.S1_at	1		Cfa.98.1.S1_at	1
GgaAffx.5837.1.A1_at	1		Cfa.7551.1.A1_at	1
Gga.19476.1.S1_at	1		Cfa.8645.1.A1_at	1
Gga.3373.2.S1_x_at	1		Cfa.17345.1.S1_at	1
GgaAffx.20269.1.S1_at	1		Cfa.16505.1.S1_at	1
Gga.2501.1.A1_at	1		Cfa.10771.1.A1_at	1
GgaAffx.12510.1.S1_at	1		CfaAffx.294.1.S1_at	1
Gga.17834.1.S1_at	1		Cfa.3254.1.S1_at	1
AY579780.CDS4.S1_at	1		Cfa.10724.1.A1_at	1
Gga.10628.1.S1_at	1		CfaAffx.18586.1.S1_s_at	1
Gga.5802.1.S1_at	1		Cfa.224.1.A1_at	1
Gga.19731.1.S1_at	1		Cfa.12161.1.A1_at	1
Gga.11192.1.S1_at	1		Cfa.2090.1.S1_at	1
Gga.19762.1.A1_at	1		Cfa.16409.1.S1_at	1
Gga.17.1.S1_at	1		Cfa.15428.1.A1_at	1
GgaAffx.11214.3.A1_at	1		Cfa.10969.1.S1_at	1
Gga.13897.1.S1_x_at	1		Cfa.5847.1.A1_at	1
Gga.9627.1.S1_at	1		Cfa.2187.1.A1_at	1
GgaAffx.11124.2.S1_at	1		Cfa.11073.1.A1_at	1
Gga.13068.1.S1_at	1		Cfa.732.1.S1_s_at	1
GgaAffx.625.1.S1_at	1		CfaAffx.11246.1.S1_s_at	1
Gga.14811.1.S1_at	1		Cfa.18916.1.S1_at	1
Gga.11051.1.S1_at	1		CfaAffx.6194.1.S1_x_at	1
Gga.5596.1.S1_at	1		CfaAffx.28517.1.S1_s_at	1
Gga.1725.2.S1_a_at	1		CfaAffx.20972.1.S1_s_at	1
GgaAffx.4354.1.S1_at	1		Cfa.11481.1.A1_at	1
GgaAffx.11652.1.S1_at	1		CfaAffx.10550.1.S1_s_at	1
Gga.4964.47.S1_x_at	1		Cfa.8066.1.A1_at	1
Gga.17934.1.S1_at	1		Cfa.5925.1.A1_at	1
GgaAffx.4976.1.A1_at	1		Cfa.3221.1.S1_at	1
Gga.548.1.S1_at	1		Cfa.12387.1.A1_at	1
Gga.5811.1.S1_s_at	1		CfaAffx.3231.1.S1_at	1
Gga.16441.1.S1_at	1		Cfa.6512.1.A1_at	1
GgaAffx.23339.2.S1_s_at	1		CfaAffx.27504.1.S1_at	1
Gga.18519.1.S1_at	1		Cfa.18258.3.S1_at	1
Gga.7742.1.S1_at	1		Cfa.16343.1.A1_at	1
Gga.7308.1.S1_at	1		CfaAffx.20629.1.S1_at	1
GgaAffx.10460.1.S1_at	1		CfaAffx.19051.1.S1_at	1
Gga.1367.1.S1_at	1		CfaAffx.28247.1.S1_s_at	1
GgaAffx.11353.1.S1_x_at	1		Cfa.7187.1.A1_a_at	1
Gga.745.1.S1_at	1		Cfa.10551.1.A1_at	1
GgaAffx.20553.1.S1_s_at	1		Cfa.6076.1.A1_at	1
Gga.6001.1.S1_at	1		Cfa.4795.1.A1_at	1
Gga.20011.1.S1_s_at	1		Cfa.11501.1.A1_at	1
Gga.6251.1.S1_at	1		Cfa.1935.1.A1_at	1
Gga.17413.1.A1_at	1		Cfa.10950.1.A1_at	1
GgaAffx.26455.1.S1_at	1		CfaAffx.4389.1.S1_s_at	1
Gga.19969.1.S1_at	1		Cfa.10530.1.A1_at	1
Gga.17462.1.S1_at	1		Cfa.10120.1.S1_at	1
Gga.13525.1.S1_at	1		Cfa.15590.1.A1_at	1
Gga.10069.1.S1_at	1		RPTR-Cfa-AF323980-1_at	1
Gga.7332.1.S1_at	1		Cfa.6623.1.A1_at	1
Gga.14065.1.A1_at	1		Cfa.8508.1.A1_at	1
Gga.18250.1.A1_at	1		Cfa.6796.1.A1_at	1
Gga.18085.1.S1_at	1		Cfa.19005.1.S1_at	1
Gga.8110.1.S1_at	1		Cfa.1599.1.A1_at	1
Gga.1335.2.S1_a_at	1		Cfa.8230.1.A1_at	1
GgaAffx.10870.1.S1_at	1		Cfa.6496.1.S1_at	1
Gga.17738.1.S1_at	1		Cfa.14272.1.A1_at	1
Gga.17907.1.A1_at	1		Cfa.8839.1.A1_at	1
GgaAffx.21179.1.S1_at	1		Cfa.19545.1.S1_at	1
Gga.13870.1.A1_at	1		CfaAffx.2814.1.S1_s_at	1
Gga.13010.1.S1_at	1		Cfa.5278.1.A1_at	1
GgaAffx.7828.1.S1_s_at	1		Cfa.525.1.S1_at	1
Gga.5990.1.S1_at	1		Cfa.2944.1.A1_at	1
Gga.7941.1.S1_at	1		Cfa.15726.1.A1_at	1
Gga.11924.1.S1_at	1		Cfa.10153.1.S1_at	1
Gga.16452.1.S1_at	1		CfaAffx.21660.1.S1_at	1
Gga.13825.1.A1_at	1		CfaAffx.13888.1.S1_at	1
Gga.13818.1.A1_at	1		Cfa.6624.2.A1_x_at	1
Gga.6693.1.S1_at	1		Cfa.16585.1.A1_at	1
Gga.17635.1.S1_at	1		Cfa.12456.1.A1_at	1
Gga.1068.1.S1_at	1		Cfa.17081.1.S1_at	1
Gga.13858.1.S1_at	1		Cfa.1880.1.A1_at	1
GgaAffx.21261.1.S1_at	1		Cfa.16520.1.S1_at	1
Gga.18318.1.S1_at	1		Cfa.2536.1.A1_at	1
Gga.9506.1.A1_at	1		Cfa.10797.1.A1_at	1
Gga.19410.1.A1_at	1		CfaAffx.10783.1.S1_at	1
Gga.12415.1.S1_at	1		Cfa.4769.1.A1_at	1
Gga.18761.1.S1_at	1		Cfa.15717.1.A1_at	1
Gga.1799.1.S1_x_at	1		Cfa.9498.1.A1_at	1
Gga.8944.2.S1_s_at	1		CfaAffx.32014.1.S1_at	1
Gga.14908.1.A1_at	1		Cfa.11320.1.A1_at	1
Gga.19701.1.S1_at	1		CfaAffx.32015.1.S1_at	1
Gga.18958.1.S1_at	1		Cfa.15982.1.A1_at	1
GgaAffx.21071.1.S1_at	1		CfaAffx.24949.1.S1_at	1
GgaAffx.11204.1.S1_x_at	1		Cfa.9790.1.A1_at	1
GgaAffx.10125.2.S1_at	1		CfaAffx.1896.1.S1_s_at	1
Gga.16304.1.S1_a_at	1		Cfa.12622.1.A1_at	1
AF243438.CDS35.S1_s_at	1		CfaAffx.21090.1.S1_s_at	1
GgaAffx.26514.1.S1_at	1		Cfa.9448.1.A1_at	1
Gga.15259.1.S1_at	1		Cfa.11723.1.A1_at	1
GgaAffx.21376.1.S1_at	1		CfaAffx.10455.1.S1_at	1
Gga.518.1.S1_x_at	1		Cfa.2708.1.S1_at	1
Gga.5023.1.S1_at	1		Cfa.2564.1.A1_at	1
Gga.10811.1.S1_at	1		Cfa.5194.1.A1_at	1
GgaAffx.25006.1.S1_at	1		Cfa.288.2.S1_at	1
GgaAffx.21666.1.S1_at	1		Cfa.18786.1.S1_at	1
GgaAffx.20264.1.S1_at	1		Cfa.14482.1.A1_at	1
Gga.13675.1.S1_at	1		CfaAffx.698.1.S1_at	1
GgaAffx.20449.1.S1_at	1		Cfa.5761.1.A1_at	1
Gga.2254.1.S1_at	1		CfaAffx.568.1.S1_at	1
Gga.13873.1.S1_at	1		CfaAffx.24631.1.S1_at	1
Gga.19194.1.S1_at	1		Cfa.15433.1.A1_at	1
GgaAffx.3418.1.S1_at	1		Cfa.3717.1.S1_at	1
Gga.17851.1.S1_at	1		Cfa.6258.1.A1_at	1
Gga.11241.1.S1_at	1		Cfa.14428.1.A1_at	1
NC-002641.CDS56.S1_at	1		Cfa.11871.1.A1_at	1
Gga.17798.1.A1_at	1		Cfa.7722.1.A1_at	1
Gga.9564.1.S1_at	1		Cfa.4852.1.A1_at	1
Gga.12745.1.A1_at	1		Cfa.4787.1.A1_at	1
Gga.18212.1.S1_at	1		Cfa.8931.1.A1_at	1
Gga.11915.2.S1_a_at	1		Cfa.9452.1.S1_at	1
Gga.19713.1.A1_at	1		Cfa.5178.2.A1_at	1
Gga.1327.1.S1_s_at	1		Cfa.4514.1.A1_at	1
Gga.10863.1.S1_at	1		CfaAffx.9848.1.S1_s_at	1
Gga.14033.1.S1_at	1		Cfa.1816.1.A1_s_at	1
Gga.14340.1.A1_at	1		CfaAffx.581.1.S1_at	1
Gga.5339.1.S1_at	1		CfaAffx.23287.1.S1_s_at	1
Gga.16549.1.S1_at	1		Cfa.6674.1.A1_at	1
Gga.11244.1.S1_at	1		Cfa.17810.1.S1_at	1
Gga.10934.1.S1_at	1		Cfa.11257.1.A1_at	1
Gga.13723.1.S1_at	1		Cfa.328.1.S1_at	1
Gga.13460.1.S1_at	1		Cfa.2131.1.S1_at	1
GgaAffx.20373.1.S1_at	1		Cfa.13016.1.S1_at	1
GgaAffx.21175.1.S1_at	1		CfaAffx.28888.1.S1_at	1
GgaAffx.20453.1.S1_at	1		Cfa.2727.1.A1_at	1
Gga.16454.1.S1_at	1		Cfa.20174.1.S1_at	1
NC-002617.CDS6.S1_at	1		Cfa.3118.1.A1_at	1
Gga.1530.1.S1_at	1		Cfa.7811.1.A1_at	1
Gga.15147.1.S1_at	1		Cfa.474.1.S1_at	1
GgaAffx.11139.1.A1_at	1		Cfa.13331.1.A1_at	1
Gga.14365.1.A1_at	1		Cfa.9090.1.A1_at	1
Gga.10254.1.S1_at	1		CfaAffx.9569.1.S1_s_at	1
Gga.18252.1.A1_at	1		CfaAffx.6411.1.S1_at	1
Gga.1427.1.S1_at	1		CfaAffx.11458.1.S1_s_at	1
Gga.659.1.S1_at	1		Cfa.4681.1.A1_at	1
Gga.4336.2.S1_at	1		Cfa.2545.1.S1_at	1
NC-002188.CDS7.S1_s_at	1		CfaAffx.576.1.S1_at	1
GgaAffx.845.1.A1_at	1		Cfa.7368.1.S1_at	1
Gga.17908.1.S1_at	1		Cfa.6256.1.S1_at	1
Gga.9292.1.S1_at	1		Cfa.3752.1.A1_at	1
Gga.18630.1.S1_at	1		Cfa.20981.1.S1_at	1
Gga.13702.1.S1_at	1		Cfa.15789.1.A1_at	1
Gga.13494.1.S1_at	1		Cfa.11527.1.A1_at	1
Gga.1445.1.S1_at	1		Cfa.12632.1.A1_at	1
Gga.19585.1.S1_at	1		CfaAffx.7393.1.S1_at	1
GgaAffx.12319.1.S1_s_at	1		CfaAffx.732.1.S1_x_at	1
Gga.16919.1.S1_at	1		Cfa.14764.1.A1_at	1
NC-001427.CDS3.S1_s_at	1		Cfa.19384.1.S1_at	1
Gga.7666.1.S1_at	1		Cfa.3592.2.S1_at	1
Gga.10962.1.S1_at	1		Cfa.17405.2.A1_at	1
Gga.1404.3.S1_x_at	1		Cfa.12839.2.S1_a_at	1
Gga.13816.1.A1_at	1		Cfa.13044.1.A1_s_at	1
Gga.11077.1.S1_at	1		CfaAffx.29112.1.S1_at	1
Gga.12020.1.A1_at	1		Cfa.7035.1.A1_at	1
Gga.19863.1.A1_at	1		Cfa.2259.1.A1_at	1
Gga.6136.2.S1_a_at	1		Cfa.2250.1.A1_at	1
GgaAffx.12705.1.S1_at	1		Cfa.2114.1.S1_at	1
Gga.19472.1.A1_at	1		AFFX-Cfa-gapdh-M_x_at	1
GgaAffx.2919.1.S1_at	1		Cfa.2055.1.S1_at	1
GgaAffx.20483.1.S1_at	1		Cfa.5980.1.A1_at	1
Gga.13347.1.S1_at	1		CfaAffx.755.1.S1_at	1
Gga.11333.1.S1_at	1		Cfa.4968.1.A1_at	1
NC-004178.CDS1.S1_s_at	1		CfaAffx.12943.1.S1_at	1
Gga.6273.2.S1_a_at	1		Cfa.5400.1.A1_at	1
Gga.7634.1.S1_at	1		Cfa.9372.1.A1_at	1
Gga.4581.1.S1_at	1		Cfa.2301.1.A1_at	1
GgaAffx.20924.1.S1_at	1		Cfa.15633.1.A1_at	1
GgaAffx.12100.2.A1_at	1		Cfa.7952.1.A1_at	1
Gga.8701.1.S1_at	1		Cfa.16767.1.A1_at	1
Gga.18104.1.S1_at	1		Cfa.7064.1.A1_at	1
Gga.5994.1.S1_at	1		Cfa.2112.1.A1_at	1
NC-002188.CDS66.S1_at	1		Cfa.12854.1.S1_at	1
Gga.17377.1.S1_at	1		CfaAffx.16302.1.S1_x_at	1
GgaAffx.11922.1.S1_at	1		Cfa.11869.1.A1_at	1
Gga.6044.3.S1_a_at	1		CfaAffx.121.1.S1_at	1
Gga.13010.1.S1_s_at	1		Cfa.18360.1.S1_at	1
Gga.17918.1.A1_at	1		Cfa.1835.1.S1_at	1
Gga.18691.1.S1_at	1		CfaAffx.806.1.S1_at	1
Gga.16538.1.S1_at	1		CfaAffx.13043.1.S1_at	1
Gga.6758.1.S1_at	1		CfaAffx.12225.1.S1_s_at	1
Gga.3963.1.S1_at	1		Cfa.14341.1.A1_at	1
Gga.19525.1.A1_at	1		Cfa.14618.1.A1_at	1
Gga.2687.1.S1_at	1		Cfa.14610.1.A1_at	1
Gga.19522.1.S1_at	1		Cfa.8382.1.A1_at	1
Gga.14945.1.S1_at	1		CfaAffx.7644.1.S1_x_at	1
Gga.11884.1.S1_at	1		CfaAffx.31058.1.S1_at	1
Gga.10001.1.S1_at	1		Cfa.129.1.A1_at	1
Gga.18855.1.A1_at	1		Cfa.11806.1.A1_at	1
Gga.10818.2.S1_s_at	1		Cfa.11010.1.A1_at	1
Gga.10308.1.S1_at	1		Cfa.16878.1.S1_s_at	1
GgaAffx.5797.2.A1_at	1		Cfa.15330.1.A1_at	1
Gga.9446.1.S1_s_at	1		Cfa.8722.1.A1_at	1
NC-002188.CDS90.S1_at	1		Cfa.20975.1.S1_s_at	1
Gga.12072.2.A1_at	1		CfaAffx.662.1.S1_at	1
Gga.13712.1.A1_at	1		Cfa.11289.1.A1_at	1
GgaAffx.11124.1.S1_at	1		Cfa.8083.2.A1_a_at	1
Gga.5738.1.S1_at	1		Cfa.13764.1.S1_at	1
Gga.5047.1.A1_at	1		Cfa.12471.1.A1_at	1
AFFX-Gga-TrpnX-M_at	1		Cfa.11126.2.A1_at	1
GgaAffx.21303.1.S1_at	1		Cfa.11997.1.A1_at	1
Gga.1628.1.A1_at	1		Cfa.8598.1.A1_at	1
Gga.14994.1.A1_at	1		CfaAffx.7016.1.S1_at	1
Gga.14096.1.S1_at	1		Cfa.1539.1.S1_at	1
Gga.18653.1.S1_at	1		Cfa.4983.1.A1_at	1
GgaAffx.20599.1.S1_s_at	1		Cfa.440.1.S1_at	1
Gga.17771.1.A1_at	1		CfaAffx.12967.1.S1_at	1
GgaAffx.12110.1.S1_at	1		Cfa.12523.1.A1_at	1
Gga.5169.2.S1_a_at	1		Cfa.7073.2.A1_a_at	1
GgaAffx.11171.1.S1_at	1		Cfa.9915.1.A1_at	1
NC-002188.CDS50.S1_at	1		Cfa.988.1.S1_at	1
GgaAffx.26334.1.A1_at	1		Cfa.14838.1.A1_at	1
GgaAffx.20870.1.S1_at	1		Cfa.10213.1.S1_at	1
GgaAffx.11182.1.S1_at	1		CfaAffx.20279.1.S1_at	1
Gga.16290.1.S1_at	1		Cfa.7631.1.A1_at	1
Gga.14545.1.A1_at	1		Cfa.1911.1.A1_at	1
Gga.3388.3.S1_at	1		Cfa.6162.1.A1_at	1
Gga.7272.1.S1_at	1		CfaAffx.29361.1.S1_at	1
GgaAffx.8055.1.S1_s_at	1		Cfa.8079.1.A1_at	1
Gga.5230.1.S1_at	1		Cfa.5545.1.A1_at	1
Gga.1964.1.S1_at	1		Cfa.14579.2.A1_at	1
Gga.18525.1.S1_at	1		Cfa.1423.1.S1_at	1
GgaAffx.25355.1.S1_at	1		Cfa.14634.1.A1_at	1
Gga.18871.1.S1_at	1		CfaAffx.32009.1.S1_at	1
GgaAffx.8394.1.S1_at	1		Cfa.8803.1.A1_at	1
GgaAffx.11765.1.S1_s_at	1		Cfa.1861.1.A1_at	1
Gga.7725.1.S1_at	1		Cfa.463.1.S1_at	1
GgaAffx.8851.1.S1_at	1		Cfa.4733.1.S1_at	1
Gga.14296.1.A1_at	1		CfaAffx.10660.1.S1_s_at	1
Gga.11626.1.S1_at	1		Cfa.5017.1.A1_at	1
GgaAffx.21812.1.S1_s_at	1		Cfa.5754.1.A1_at	1
Gga.18768.1.S1_at	1		CfaAffx.28274.1.S1_at	1
Gga.15913.1.S1_at	1		Cfa.7745.1.A1_at	1
GgaAffx.3450.1.S1_at	1		CfaAffx.17003.1.S1_s_at	1
GgaAffx.20188.1.S1_at	1		Cfa.15660.1.A1_s_at	1
Gga.12469.1.S1_at	1		Cfa.10241.1.A1_at	1
GgaAffx.10584.4.S1_at	1		CfaAffx.16444.1.S1_at	1
Gga.16620.1.S1_at	1		Cfa.5780.1.A1_at	1
Gga.12108.1.S1_at	1		Cfa.17031.1.S1_s_at	1
Gga.9877.1.S1_at	1		Cfa.2048.1.S1_at	1
Gga.17091.1.A1_at	1		Cfa.1675.1.S1_at	1
Gga.16279.1.S1_at	1		CfaAffx.23971.1.S1_at	1
Gga.6449.1.S1_at	1		Cfa.7063.1.A1_at	1
Gga.1262.2.S1_at	1		RPTR-Cfa-U47295-1_at	1
Gga.7749.1.S1_at	1		Cfa.3968.1.A1_at	1
Gga.17761.1.S1_at	1		Cfa.8191.1.A1_at	1
Gga.10084.1.A1_at	1		Cfa.14874.1.A1_at	1
Gga.14216.1.S1_at	1		Cfa.296.1.S1_at	1
Gga.12382.1.S1_at	1		RPTR-Cfa-X58791-2_s_at	1
Gga.1878.2.A1_at	1		CfaAffx.22547.1.S1_at	1
GgaAffx.3780.1.S1_at	1		Cfa.747.1.A1_at	1
GgaAffx.21185.1.S1_at	1		Cfa.7697.1.A1_at	1
Gga.2519.1.S1_at	1		Cfa.7464.1.A1_at	1
GgaAffx.4704.1.S1_at	1		Cfa.9078.1.A1_at	1
Gga.13764.1.A1_at	1		Cfa.11172.1.A1_at	1
Gga.10078.2.S1_x_at	1		Cfa.10578.1.A1_at	1
GgaAffx.24016.1.A1_at	1		Cfa.5429.1.A1_at	1
GgaAffx.23623.1.S1_s_at	1		Cfa.2141.1.A1_at	1
Gga.16555.1.S1_at	1		CfaAffx.20032.1.S1_at	1
GgaAffx.10303.1.S1_at	1		Cfa.4120.1.S1_at	1
Gga.18649.1.A1_at	1		Cfa.2160.1.A1_at	1
Gga.16715.1.S1_at	1		Cfa.14738.1.A1_at	1
Gga.5658.1.S1_at	1		CfaAffx.26431.1.S1_at	1
Gga.13814.1.S1_at	1		Cfa.9333.1.A1_at	1
Gga.17773.1.A1_at	1		Cfa.15049.1.S1_a_at	1
GgaAffx.21263.1.S1_s_at	1		CfaAffx.6489.1.S1_at	1
Gga.17712.1.A1_at	1		Cfa.11079.2.A1_a_at	1
Gga.13119.1.S1_at	1		Cfa.5541.1.A1_at	1
Gga.2381.2.S1_at	1		CfaAffx.12206.1.S1_at	1
Gga.15300.1.S1_at	1		Cfa.8055.1.A1_s_at	1
Gga.5727.3.S1_a_at	1		Cfa.13386.1.A1_at	1
Gga.16592.1.S1_at	1		Cfa.11304.1.A1_at	1
GgaAffx.1427.1.S1_at	1		Cfa.5166.1.A1_at	1
Gga.19804.1.S1_at	1		Cfa.4092.1.S1_at	1
Gga.1795.2.S1_a_at	1		Cfa.13675.1.A1_at	1
Gga.17896.1.S1_at	1		Cfa.6618.1.A1_at	1
Gga.4208.1.S1_at	1		Cfa.19359.1.S1_at	1
Gga.17740.1.S1_at	1		Cfa.15496.1.A1_at	1
Gga.16407.1.S1_at	1		CfaAffx.30338.1.S1_at	1
Gga.2994.1.S1_at	1		CfaAffx.13407.1.S1_s_at	1
Gga.14474.1.S1_at	1		CfaAffx.15954.1.S1_x_at	1
Gga.2909.2.S1_at	1		Cfa.11380.1.A1_s_at	1
GgaAffx.21513.1.S1_at	1		CfaAffx.12548.1.S1_at	1
Gga.4485.2.S1_s_at	1		Cfa.7808.1.A1_at	1
Gga.1604.1.S1_at	1		Cfa.11459.1.S1_at	1
Gga.13774.1.S1_at	1		CfaAffx.23635.1.S1_at	1
Gga.2807.1.S1_at	1		Cfa.21067.1.S1_at	1
Gga.14384.1.S1_at	1		Cfa.16858.1.S1_x_at	1
GgaAffx.1186.1.A1_at	1		Cfa.1405.1.A1_at	1
GgaAffx.118.3.S1_at	1		Cfa.10662.2.A1_at	1
Gga.5112.1.S1_at	1		Cfa.2648.1.S1_at	1
Gga.390.1.S1_at	1		Cfa.10052.1.S1_at	1
Gga.16239.1.S1_at	1		CfaAffx.22427.1.S1_s_at	1
GgaAffx.7206.1.A1_at	1		CfaAffx.2235.1.S1_at	1
Gga.12700.1.A1_at	1		Cfa.4748.1.A1_at	1
GgaAffx.12186.1.S1_s_at	1		CfaAffx.12468.1.S1_s_at	1
GgaAffx.23623.1.S1_at	1		CfaAffx.1035.1.S1_at	1
Gga.4138.2.S1_at	1		Cfa.11126.1.A1_at	1
Gga.11225.1.S1_s_at	1		AFFX-Cfa-actin-5_s_at	1
GgaAffx.21440.1.S1_at	1		Cfa.3908.1.S1_s_at	1
GgaAffx.12973.1.S1_at	1		CfaAffx.25353.1.S1_at	1
GgaAffx.1249.1.S1_at	1		Cfa.8574.1.A1_x_at	1
Gga.14224.1.S1_at	1		Cfa.2081.1.S1_a_at	1
GgaAffx.20262.1.S1_at	1		Cfa.17792.1.S1_at	1
Gga.330.1.S1_at	1		Cfa.1742.1.S1_at	1
Gga.13880.1.A1_at	1		Cfa.18876.2.A1_at	1
Gga.4690.3.S1_a_at	1		Cfa.11994.1.A1_at	1
Gga.19343.1.S1_at	1		CfaAffx.266.1.S1_at	1
Gga.15845.1.S1_at	1		CfaAffx.12599.1.S1_at	1
RPTR-Gga-M62653-1_at	1		Cfa.4306.2.S1_a_at	1
GgaAffx.1265.1.S1_at	1		Cfa.20168.1.S1_at	1
Gga.9868.1.S1_at	1		Cfa.1605.1.S1_at	1
Gga.1041.3.S1_a_at	1		Cfa.10125.4.A1_at	1
GgaAffx.11694.1.S1_at	1		Cfa.4803.1.A1_at	1
Gga.8276.1.S1_at	1		Cfa.17817.1.S1_s_at	1
Gga.18299.1.A1_at	1		CfaAffx.13926.1.S1_at	1
Gga.18019.1.S1_at	1		Cfa.2045.1.S1_at	1
GgaAffx.9332.1.S1_at	1		Cfa.10889.1.S1_s_at	1
Gga.9295.1.S1_at	1		Cfa.11382.1.A1_at	1
Gga.8944.1.S1_at	1		Cfa.20339.1.S1_at	1
Gga.19893.1.S1_at	1		CfaAffx.4803.1.S1_at	1
GgaAffx.23570.3.S1_at	1		Cfa.8401.1.A1_at	1
GgaAffx.108.1.S1_at	1		CfaAffx.27737.1.S1_at	1
Gga.8515.1.S1_at	1		Cfa.14702.1.A1_at	1
GgaAffx.6062.1.S1_at	1		Cfa.2292.1.A1_at	1
Gga.7913.2.S1_s_at	1		Cfa.12084.1.A1_at	1
Gga.15109.1.S1_at	1		Cfa.8210.1.A1_s_at	1
Gga.16464.1.S1_at	1		Cfa.6994.1.A1_at	1
Gga.10269.1.S1_at	1		Cfa.16935.1.S1_at	1
Gga.14599.1.A1_at	1		CfaAffx.19921.1.S1_s_at	1
GgaAffx.888.1.A1_at	1		Cfa.5749.1.A1_at	1
Gga.10483.1.A1_at	1		Cfa.6927.1.A1_at	1
Gga.11860.1.S1_at	1		CfaAffx.7225.1.S1_x_at	1
GgaAffx.719.3.A1_at	1		RPTR-Cfa-AY342347_at	1
GgaAffx.25862.1.S1_at	1		Cfa.9952.1.A1_at	1
Gga.6251.2.S1_at	1		Cfa.15142.1.A1_at	1
GgaAffx.4422.1.A1_at	1		CfaAffx.19220.1.S1_at	1
GgaAffx.20914.1.S1_at	1		Cfa.8731.1.A1_at	1
Gga.7598.1.S1_at	1		Cfa.3213.1.A1_at	1
Gga.12554.2.S1_a_at	1		Cfa.17292.1.S1_at	1
Gga.9352.1.S1_at	1		Cfa.12250.2.A1_at	1
Gga.3117.1.S1_at	1		CfaAffx.8212.1.S1_s_at	1
Gga.13610.1.A1_at	1		Cfa.19167.1.S1_at	1
Gga.1199.1.S1_at	1		CfaAffx.25906.1.S1_at	1
Gga.8114.1.S1_at	1		Cfa.526.1.A1_at	1
Gga.8839.2.S1_a_at	1		Cfa.13693.1.A1_at	1
Gga.18241.1.A1_at	1		CfaAffx.23405.1.S1_at	1
Gga.12131.1.S1_at	1		Cfa.7665.1.A1_at	1
GgaAffx.1026.1.S1_at	1		Cfa.12879.1.A1_at	1
Gga.8099.1.S1_at	1		Cfa.19686.1.S1_at	1
GgaAffx.4527.1.S1_at	1		Cfa.5409.1.A1_at	1
Gga.11087.1.S1_at	1		Cfa.12153.1.A1_at	1
Gga.13809.1.S1_at	1		Cfa.8861.1.A1_at	1
Gga.10480.1.S1_at	1		Cfa.16195.1.S1_at	1
GgaAffx.4893.1.S1_at	1		CfaAffx.12684.1.S1_at	1
Gga.14447.1.A1_at	1		Cfa.5280.1.A1_at	1
Gga.5179.1.S1_at	1		Cfa.10329.1.A1_at	1
Gga.392.1.S1_at	1		Cfa.7202.1.S1_a_at	1
GgaAffx.23594.1.S1_at	1		Cfa.11164.1.A1_at	1
GgaAffx.21348.1.S1_at	1		CfaAffx.20533.1.S1_at	1
Gga.12806.1.S1_at	1		Cfa.10462.2.S1_at	1
Gga.17252.1.S1_s_at	1		Cfa.10993.1.A1_at	1
Gga.12536.1.S1_at	1		Cfa.689.1.A1_at	1
Gga.19976.1.S1_at	1		Cfa.4406.2.S1_a_at	1
GgaAffx.21788.1.S1_s_at	1		Cfa.1752.1.S1_at	1
Gga.9539.1.A1_at	1		Cfa.11931.1.A1_at	1
Gga.5434.1.S1_at	1		CfaAffx.13387.1.S1_at	1
Gga.19972.1.S1_at	1		Cfa.11933.1.A1_at	1
Gga.10089.1.S1_s_at	1		Cfa.11764.1.A1_at	1
Gga.8337.1.S1_at	1		Cfa.8883.1.A1_at	1
Gga.13608.1.S1_at	1		Cfa.471.1.A1_at	1
GgaAffx.9229.1.A1_at	1		Cfa.16685.1.A1_at	1
GgaAffx.3448.1.A1_at	1		CfaAffx.25511.1.S1_x_at	1
Gga.15471.1.S1_at	1		Cfa.15581.1.A1_at	1
Gga.14942.1.S1_at	1		Cfa.10374.2.A1_at	1
Gga.17887.1.A1_at	1		Cfa.3080.1.A1_at	1
Gga.15485.1.S1_at	1		Cfa.19597.1.S1_at	1
GgaAffx.8109.1.S1_s_at	1		Cfa.10428.1.A1_at	1
Gga.18589.1.S1_at	1		Cfa.7147.1.A1_at	1
Gga.13416.1.S1_at	1		Cfa.14899.1.S1_at	1
Gga.7647.2.S1_at	1		Cfa.10877.1.A1_at	1
GgaAffx.21447.1.S1_s_at	1		CfaAffx.534.1.S1_x_at	1
Gga.19596.1.A1_at	1		Cfa.13077.1.A1_at	1
Gga.13679.1.S1_at	1		Cfa.13060.1.A1_at	1
Gga.10598.1.S1_at	1		AFFX-Cfa-gapdh-3_x_at	1
NC-005264.CDS8.S1_at	1		Cfa.10865.1.S1_at	1
Gga.4856.3.S1_at	1		CfaAffx.26031.1.S1_s_at	1
Gga.19373.1.S1_at	1		Cfa.8490.1.A1_at	1
Gga.7369.1.S1_at	1		CfaAffx.6111.1.S1_x_at	1
Gga.18396.1.S1_at	1		Cfa.17179.1.S1_at	1
Gga.16415.2.S1_a_at	1		CfaAffx.20785.1.S1_at	1
NC-002188.CDS229.S1_at	1		Cfa.11790.1.A1_at	1
Gga.1231.1.S1_at	1		Cfa.7231.1.A1_at	1
Gga.5964.1.S1_at	1		Cfa.21635.2.S1_a_at	1
Gga.19812.1.A1_at	1		Cfa.49.1.S1_at	1
Gga.18164.1.S1_at	1		Cfa.11386.1.A1_at	1
AF176590.CDS1.S1_s_at	1		Cfa.7907.2.A1_a_at	1
Gga.7051.1.S1_at	1		Cfa.453.1.A1_at	1
Gga.12396.2.S1_at	1		Cfa.5482.1.A1_at	1
Gga.9980.2.S1_a_at	1		CfaAffx.28940.1.S1_at	1
GgaAffx.9092.1.A1_at	1		Cfa.8825.1.A1_s_at	1
Gga.13683.1.A1_at	1		Cfa.10229.1.A1_s_at	1
Gga.13998.1.S1_at	1		Cfa.7497.1.A1_at	1
Gga.6993.1.S1_at	1		CfaAffx.6517.1.S1_s_at	1
Gga.5171.1.S1_at	1		Cfa.7876.1.A1_at	1
Gga.12807.1.S1_at	1		Cfa.5426.1.A1_at	1
Gga.17858.1.S1_at	1		Cfa.18258.1.S1_at	1
Gga.19009.1.S1_at	1		Cfa.1021.1.A1_at	1
AF243438.CDS96.S1_s_at	1		Cfa.20162.1.S1_s_at	1
GgaAffx.3640.1.S1_at	1		CfaAffx.22899.1.S1_s_at	1
Gga.15493.1.S1_at	1		Cfa.9424.1.A1_at	1
GgaAffx.23697.1.S1_at	1		Cfa.7705.1.A1_at	1
GgaAffx.21588.1.S1_at	1		Cfa.6934.1.A1_at	1
GgaAffx.12190.1.S1_s_at	1		Cfa.10154.1.A1_at	1
Gga.13833.1.S1_at	1		Cfa.7620.1.A1_at	1
Gga.9158.1.S1_at	1		Cfa.15535.1.A1_at	1
Gga.13957.1.S1_at	1		Cfa.4642.1.A1_at	1
Gga.19770.1.S1_at	1		Cfa.8203.1.A1_at	1
Gga.13666.1.S1_at	1		CfaAffx.5738.1.S1_s_at	1
Gga.9326.1.S1_at	1		CfaAffx.4417.1.S1_at	1
Gga.3663.3.A1_at	1		Cfa.14894.1.A1_at	1
Gga.17839.1.A1_at	1		CfaAffx.28736.1.S1_at	1
Gga.14483.1.S1_x_at	1		Cfa.8753.1.A1_at	1
GgaAffx.11896.1.A1_at	1		CfaAffx.6943.1.S1_at	1
Gga.3296.1.S1_at	1		Cfa.6814.1.A1_at	1
Gga.6483.1.S1_at	1		CfaAffx.13750.1.S1_at	1
Gga.3310.1.S1_at	1		Cfa.12772.1.A1_at	1
Gga.13596.1.A1_at	1		Cfa.14471.1.A1_at	1
Gga.17942.1.S1_at	1		Cfa.10413.2.S1_a_at	1
Gga.15084.1.A1_at	1		Cfa.1406.1.S1_at	1
Gga.12490.1.S1_at	1		Cfa.9422.1.A1_at	1
GgaAffx.21426.1.S1_at	1		Cfa.6772.1.A1_at	1
Gga.16537.1.S1_at	1		Cfa.17046.1.S1_at	1
GgaAffx.20722.1.S1_at	1		Cfa.9626.1.A1_at	1
Gga.7231.1.S1_at	1		Cfa.7673.1.A1_at	1
Gga.1299.1.S1_at	1		CfaAffx.7157.1.S1_s_at	1
Gga.14661.1.S1_at	1		Cfa.3759.1.A1_at	1
GgaAffx.21021.1.S1_at	1		Cfa.9614.1.A1_at	1
Gga.5005.1.S1_at	1		Cfa.5357.1.A1_at	1
Gga.9734.1.S1_at	1		AFFX-ThrX-5_at	1
Gga.6957.1.A1_at	1		Cfa.13843.1.A1_at	1
Gga.11524.1.S1_at	1		Cfa.2624.1.A1_at	1
Gga.19829.1.S1_at	1		CfaAffx.29535.1.S1_s_at	1
GgaAffx.20260.1.S1_s_at	1		Cfa.13221.1.A1_at	1
Gga.11939.1.S1_a_at	1		Cfa.2240.1.A1_at	1
GgaAffx.24695.1.S1_at	1		CfaAffx.12429.1.S1_at	1
GgaAffx.20532.1.S1_at	1		Cfa.8899.1.S1_at	1
Gga.6080.1.A1_at	1		Cfa.13365.1.A1_at	1
GgaAffx.21497.1.S1_at	1		Cfa.16568.1.S1_at	1
Gga.6052.3.S1_a_at	1		Cfa.2284.1.S1_at	1
Gga.10321.2.A1_at	1		Cfa.4261.1.A1_at	1
Gga.10011.1.A1_at	1		Cfa.18924.1.S1_at	1
Gga.4890.1.S1_at	1		AFFX-Cf_G-6-PDH_5_at	1
Gga.4058.1.S1_s_at	1		Cfa.11391.1.A1_at	1
Gga.12945.1.A1_at	1		Cfa.5783.1.A1_at	1
Gga.6971.2.S1_at	1		Cfa.3345.1.A1_at	1
Gga.502.1.S1_at	1		CfaAffx.14129.1.S1_at	1
Gga.2406.2.S1_at	1		Cfa.7611.1.A1_at	1
NC-002188.CDS144.S1_at	1		Cfa.4388.1.A1_at	1
Gga.17658.1.S1_at	1		CfaAffx.17993.1.S1_s_at	1
Gga.16662.1.S1_at	1		Cfa.12608.1.A1_at	1
Gga.12371.1.S1_at	1		Cfa.1900.1.S1_at	1
Gga.7440.1.S1_at	1		Cfa.12845.1.A1_x_at	1
GgaAffx.20715.1.S1_at	1		Cfa.8299.1.A1_s_at	1
Gga.17466.1.S1_at	1		Cfa.15421.1.A1_at	1
NC-002641.CDS92.S1_at	1		AFFX-Cfa-r2-Ec-bioB-5_at	1
Gga.9133.1.S1_at	1		Cfa.9932.1.A1_at	1
Gga.73.4.S1_at	1		Cfa.2164.1.A1_at	1
Gga.20035.1.S1_at	1		Cfa.20965.1.S1_at	1
Gga.16068.1.S1_at	1		Cfa.19769.2.A1_at	1
Gga.17803.1.S1_at	1		Cfa.11676.1.A1_at	1
Gga.3670.1.S1_at	1		Cfa.3699.1.A1_at	1
Gga.284.1.A1_at	1		Cfa.12662.1.A1_at	1
Gga.17555.1.S1_at	1		Cfa.4673.1.A1_at	1
Gga.16516.1.S1_at	1		Cfa.13997.1.A1_at	1
GgaAffx.25704.1.S1_at	1		Cfa.11557.1.A1_at	1
Gga.18082.1.S1_at	1		Cfa.13768.1.A1_at	1
Gga.13023.1.A1_at	1		Cfa.3611.1.A1_at	1
Gga.17232.1.S1_at	1		Cfa.17180.2.S1_at	1
Gga.2642.1.S1_at	1		CfaAffx.12876.1.S1_at	1
Gga.18300.1.S1_at	1		Cfa.18813.1.S1_at	1
Gga.1264.1.S1_at	1		Cfa.9642.1.A1_at	1
Gga.603.1.S1_at	1		Cfa.11777.1.S1_at	1
Gga.2559.1.S1_at	1		CfaAffx.14579.1.S1_at	1
AF243438.CDS97.S1_s_at	1		Cfa.12473.1.A1_at	1
Gga.1063.1.S1_at	1		CfaAffx.26126.1.S1_at	1
GgaAffx.13148.1.S1_s_at	1		Cfa.1085.1.A1_at	1
GgaAffx.1121.1.S1_s_at	1		CfaAffx.13089.1.S1_s_at	1
Gga.15779.1.S1_at	1		Cfa.5298.1.A1_at	1
Gga.11846.1.S1_at	1		Cfa.7050.1.S1_at	1
Gga.174.1.S1_at	1		Cfa.3067.1.S1_at	1
Gga.15291.1.S1_at	1		Cfa.8574.2.A1_x_at	1
Gga.18381.1.S1_at	1		Cfa.6083.1.A1_at	1
NC-002188.CDS164.S1_at	1		Cfa.7181.1.A1_at	1
Gga.5395.1.S1_at	1		Cfa.9405.1.A1_at	1
Gga.14798.1.A1_at	1		CfaAffx.31167.1.S1_at	1
Gga.6560.1.A1_at	1		Cfa.2209.1.A1_at	1
Gga.17412.1.S1_s_at	1		Cfa.3123.1.A1_at	1
GgaAffx.21074.1.S1_at	1		CfaAffx.1346.1.S1_at	1
GgaAffx.1505.1.A1_at	1		Cfa.4667.1.A1_at	1
Gga.18344.1.S1_at	1		CfaAffx.16677.1.S1_s_at	1
Gga.11420.1.A1_at	1		Cfa.20356.1.S1_at	1
GgaAffx.20706.1.S1_at	1		Cfa.20682.1.S1_at	1
Gga.15162.1.S1_at	1		CfaAffx.17158.1.S1_at	1
GgaAffx.26387.1.S1_x_at	1		Cfa.9678.1.A1_at	1
Gga.18853.1.A1_at	1		AFFX-Cfa-r2-Bs-lys-5_at	1
Gga.15787.1.S1_at	1		CfaAffx.32064.1.S1_at	1
Gga.15642.1.S1_at	1		Cfa.13789.1.A1_at	1
NC-002188.CDS35.S1_at	1		Cfa.19708.1.S1_at	1
GgaAffx.21076.1.S1_at	1		CfaAffx.20478.1.S1_at	1
GgaAffx.23658.1.A1_at	1		Cfa.20396.1.S1_at	1
Gga.1569.1.S1_at	1		Cfa.13291.1.A1_at	1
NC-002188.CDS8.S1_s_at	1		Cfa.9782.1.A1_at	1
Gga.15191.1.S1_at	1		Cfa.19151.1.A1_at	1
Gga.4620.1.S1_s_at	1		Cfa.8709.1.A1_at	1
GgaAffx.3864.1.S1_at	1		Cfa.6292.1.A1_at	1
GgaAffx.12406.1.S1_at	1		Cfa.7180.1.A1_at	1
Gga.18078.1.S1_at	1		Cfa.1606.1.A1_at	1
Gga.13708.1.S1_at	1		Cfa.15347.1.A1_x_at	1
Gga.19524.1.A1_at	1		Cfa.3570.1.A1_at	1
Gga.18978.1.S1_at	1		Cfa.11843.1.A1_at	1
GgaAffx.10653.1.S1_at	1		Cfa.4698.1.A1_at	1
Gga.18268.1.S1_at	1		CfaAffx.4930.1.S1_s_at	1
Gga.15374.1.S1_at	1		Cfa.11953.1.A1_at	1
Gga.11346.1.S1_at	1		Cfa.20363.2.A1_at	1
GgaAffx.2853.1.A1_at	1		Cfa.11529.1.A1_at	1
Gga.141.1.S1_at	1		CfaAffx.8697.1.S1_x_at	1
Gga.8139.1.S1_at	1		Cfa.10382.1.A1_at	1
Gga.13740.1.A1_at	1		Cfa.6626.1.A1_at	1
AFFX-Gga-r2-Bs-dap-5_at	1		Cfa.9589.1.A1_at	1
Gga.16380.1.S1_at	1		Cfa.14199.1.A1_at	1
Gga.7447.2.S1_at	1		CfaAffx.22741.1.S1_at	1
Gga.15083.1.A1_at	1		Cfa.18755.1.S1_at	1
Gga.15298.1.S1_at	1		Cfa.12708.1.A1_at	1
GgaAffx.13027.1.S1_s_at	1		Cfa.11569.1.A1_at	1
Gga.5560.2.A1_at	1		Cfa.10352.1.A1_at	1
Gga.17170.1.S1_at	1		Cfa.8789.1.S1_at	1
Gga.14712.1.S1_at	1		Cfa.16748.2.S1_a_at	1
Gga.15793.1.S1_at	1		Cfa.1582.1.A1_at	1
Gga.14312.1.S1_at	1		Cfa.13879.1.S1_at	1
GgaAffx.7108.1.S1_at	1		Cfa.4959.1.A1_at	1
Gga.13901.1.S1_at	1		Cfa.7011.1.A1_at	1
Gga.13528.1.S1_at	1		CfaAffx.1971.1.S1_s_at	1
Gga.10183.1.S1_s_at	1		Cfa.1370.1.A1_at	1
GgaAffx.21395.1.S1_at	1		Cfa.10946.1.S1_at	1
Gga.14546.1.A1_at	1		Cfa.21093.1.S1_at	1
GgaAffx.8427.1.A1_x_at	1		Cfa.9631.1.A1_at	1
GgaAffx.26705.1.S1_at	1		Cfa.12331.1.A1_at	1
GgaAffx.969.1.S1_at	1		Cfa.20251.2.S1_at	1
Gga.5050.1.S1_at	1		Cfa.1483.1.A1_at	1
GgaAffx.9776.1.S1_at	1		CfaAffx.363.1.S1_x_at	1
Gga.6535.1.S1_at	1		CfaAffx.32019.1.S1_at	1
Gga.6168.2.S1_a_at	1		Cfa.7486.1.A1_at	1
Gga.12959.1.S1_at	1		Cfa.12615.1.A1_at	1
Gga.3211.1.S1_at	1		Cfa.5190.1.A1_at	1
Gga.14633.1.S1_at	1		Cfa.8579.1.A1_at	1
Gga.15281.1.A1_at	1		Cfa.718.1.S1_at	1
Gga.6826.1.S1_at	1		Cfa.6822.1.A1_at	1
Gga.2506.1.S1_at	1		CfaAffx.732.1.S1_at	1
GgaAffx.4382.2.S1_s_at	1		Cfa.7543.1.A1_at	1
GgaAffx.26081.1.S1_s_at	1		Cfa.5965.1.A1_at	1
NC-002641.CDS5.S1_at	1		AFFX-r2-TagO-3_at	1
Gga.11271.1.A1_at	1		Cfa.10079.1.A1_at	1
AF004856.CDS1.S1_s_at	1		Cfa.976.1.S1_s_at	1
Gga.4600.1.S1_at	1		Cfa.13080.1.A1_s_at	1
Gga.3693.1.A1_at	1		CfaAffx.26323.1.S1_at	1
Gga.13663.1.S1_at	1		Cfa.9397.2.A1_at	1
Gga.8101.3.S1_at	1		Cfa.8637.1.A1_at	1
Gga.19897.1.S1_at	1		Cfa.7237.1.A1_at	1
Gga.15470.1.S1_at	1		Cfa.5100.1.A1_at	1
Gga.18219.1.S1_at	1		Cfa.4020.1.S1_at	1
Gga.15153.1.A1_at	1		Cfa.2260.1.A1_at	1
GgaAffx.23064.1.S1_at	1		Cfa.14459.1.A1_at	1
Gga.10708.1.S1_x_at	1		Cfa.20674.1.A1_at	1
Gga.8941.1.S1_s_at	1		Cfa.14129.1.A1_at	1
GgaAffx.8400.1.S1_at	1		Cfa.10892.1.A1_at	1
Gga.18780.1.S1_at	1		CfaAffx.9555.1.S1_s_at	1
Gga.15453.1.S1_at	1		Cfa.17411.1.S1_at	1
Gga.13765.1.S1_at	1		Cfa.10319.1.A1_at	1
Gga.16170.1.A1_at	1		Cfa.6132.1.A1_at	1
Gga.8102.1.S1_at	1		Cfa.19245.1.S1_at	1
Gga.1806.1.S1_at	1		Cfa.18611.1.S1_s_at	1
Gga.10447.1.S1_at	1		Cfa.4670.1.S1_at	1
Gga.17769.1.S1_at	1		CfaAffx.17155.1.S1_s_at	1
Gga.10330.1.S1_at	1		Cfa.8664.2.A1_at	1
Gga.9670.1.S1_at	1		Cfa.6096.1.A1_at	1
Gga.15770.1.S1_at	1		Cfa.14566.1.A1_at	1
Gga.9466.1.S1_s_at	1		CfaAffx.9510.1.S1_s_at	1
Gga.739.2.S1_a_at	1		Cfa.8660.1.A1_at	1
Gga.13126.1.S1_at	1		CfaAffx.18160.1.S1_at	1
GgaAffx.8548.1.A1_at	1		CfaAffx.1208.1.S1_s_at	1
GgaAffx.2044.1.S1_at	1		Cfa.3161.1.A1_at	1
Gga.5477.1.S1_at	1		Cfa.14930.2.S1_x_at	1
Gga.17700.1.S1_at	1		Cfa.14709.1.A1_at	1
Gga.7375.1.S1_at	1		Cfa.403.1.A1_at	1
GgaAffx.12085.1.S1_at	1		CfaAffx.7969.1.S1_at	1
Gga.4799.2.S1_at	1		Cfa.1374.1.S1_at	1
Gga.13318.1.S1_at	1		RPTR-Cfa-M10961-1_at	1
GgaAffx.20763.1.S1_at	1		Cfa.16193.1.S1_at	1
Gga.6874.1.S1_at	1		Cfa.9182.1.A1_at	1
NC-002188.CDS139.S1_at	1		Cfa.11249.1.A1_at	1
GgaAffx.4725.1.S1_at	1		Cfa.11707.1.A1_at	1
GgaAffx.2563.1.S1_at	1		AFFX-Cf_Gapdh_M_at	1
Gga.12646.1.S1_at	1		CfaAffx.5351.1.S1_s_at	1
Gga.10340.1.S1_at	1		CfaAffx.30805.1.S1_at	1
Gga.7964.1.S1_at	1		Cfa.6947.1.A1_at	1
Gga.15310.1.S1_s_at	1		Cfa.5722.1.A1_at	1
Gga.9059.1.S1_at	1		Cfa.15077.1.S1_at	1
Gga.16300.1.S1_at	1		Cfa.12703.1.A1_x_at	1
GgaAffx.25015.1.S1_at	1		CfaAffx.13705.1.S1_s_at	1
Gga.7239.1.S1_at	1		Cfa.15718.1.S1_at	1
GgaAffx.12263.1.S1_s_at	1		Cfa.6517.1.A1_at	1
Gga.2819.1.S1_at	1		Cfa.2361.1.A1_at	1
Gga.18522.1.S1_at	1		Cfa.14553.1.A1_at	1
Gga.10419.1.S1_at	1		Cfa.11167.1.A1_at	1
GgaAffx.21457.1.S1_at	1		Cfa.12653.3.A1_at	1
GgaAffx.20299.1.S1_at	1		AFFX-CreX-5_at	1
Gga.5806.1.S1_at	1		Cfa.9358.1.A1_at	1
Gga.15125.1.S1_at	1		Cfa.7839.1.S1_at	1
Gga.13707.1.S1_at	1		Cfa.2289.1.S1_at	1
Gga.12622.1.S1_at	1		Cfa.1918.1.A1_at	1
GgaAffx.4873.1.A1_at	1		Cfa.14863.1.A1_at	1
Gga.15038.1.S1_at	1		CfaAffx.154.1.S1_s_at	1
Gga.3713.1.A1_at	1		Cfa.4644.1.A1_at	1
Gga.6618.1.S1_at	1		CfaAffx.23147.1.S1_at	1
Gga.18952.1.S1_at	1		Cfa.11030.1.A1_at	1
Gga.7740.2.A1_at	1		Cfa.17958.1.S1_s_at	1
Gga.14334.1.S1_at	1		Cfa.16633.1.A1_at	1
Gga.11526.1.S1_at	1		CfaAffx.218.1.S1_at	1
Gga.15285.1.S1_at	1		Cfa.9992.1.A1_at	1
Gga.12162.1.S1_at	1		Cfa.7230.1.A1_at	1
Gga.11399.2.A1_at	1		Cfa.3019.1.A1_at	1
Gga.1976.1.S1_at	1		Cfa.2257.1.A1_at	1
GgaAffx.24252.1.S1_at	1		Cfa.15542.1.A1_at	1
Gga.13863.1.S1_at	1		Cfa.13800.1.A1_at	1
Gga.29.1.S1_at	1		Cfa.306.1.S1_at	1
Gga.13324.1.S1_at	1		Cfa.16327.1.S1_at	1
Gga.1154.1.A1_at	1		Cfa.14683.1.A1_at	1
GgaAffx.5811.1.A1_at	1		Cfa.10137.1.A1_at	1
Gga.13729.1.S1_at	1		CfaAffx.5557.1.S1_at	1
Gga.16225.1.S1_at	1		Cfa.7279.1.A1_at	1
Gga.6213.2.A1_at	1		Cfa.17400.1.S1_at	1
GgaAffx.7751.1.S1_at	1		CfaAffx.10265.1.S1_at	1
Gga.11152.1.A1_at	1		Cfa.8264.1.A1_at	1
Gga.18884.1.S1_at	1		Cfa.417.1.A1_at	1
Gga.19903.1.A1_at	1		Cfa.13377.1.A1_at	1
Gga.12696.1.S1_at	1		Cfa.15950.1.S1_at	1
Gga.3823.2.S1_at	1		Cfa.10169.1.A1_s_at	1
Gga.13166.1.S1_at	1		Cfa.12843.1.A1_at	1
NC-002188.CDS176.S1_at	1		Cfa.10650.1.A1_at	1
Gga.11165.1.S1_at	1		Cfa.4859.1.A1_at	1
Gga.19535.1.A1_at	1		Cfa.867.1.A1_at	1
Gga.16125.1.S1_at	1		Cfa.5119.1.A1_at	1
GgaAffx.20250.1.S1_at	1		Cfa.1263.1.S1_at	1
Gga.12469.1.S1_x_at	1		Cfa.9017.1.A1_at	1
Gga.1149.1.S1_at	1		Cfa.5463.1.A1_at	1
GgaAffx.26701.1.S1_at	1		Cfa.7200.1.A1_at	1
Gga.17843.1.S1_at	1		Cfa.5324.1.A1_at	1
Gga.5453.1.S1_at	1		Cfa.7654.1.A1_at	1
Gga.17735.1.S1_at	1		Cfa.10712.1.S1_at	1
Gga.15061.1.S1_at	1		Cfa.21060.1.S1_at	1
Gga.5137.1.S1_x_at	1		Cfa.4992.1.A1_at	1
GgaAffx.20551.1.S1_s_at	1		Cfa.11856.1.A1_at	1
GgaAffx.10183.1.S1_at	1		Cfa.6793.1.A1_at	1
Gga.14242.1.A1_at	1		Cfa.14355.1.A1_s_at	1
Gga.17248.2.A1_at	1		CfaAffx.14215.1.S1_at	1
NC-002641.CDS51.S1_at	1		Cfa.4939.1.A1_at	1
GgaAffx.11244.1.A1_at	1		Cfa.10461.1.S1_at	1
Gga.20011.2.A1_at	1		Cfa.12016.1.A1_at	1
Gga.1840.1.S1_at	1		CfaAffx.14824.1.S1_at	1
Gga.10412.1.S1_at	1		Cfa.4766.1.A1_at	1
Gga.2279.1.S1_at	1		Cfa.10876.1.A1_at	1
GgaAffx.20496.1.S1_at	1		CfaAffx.11944.1.S1_x_at	1
Gga.19442.1.A1_at	1		Cfa.2496.2.S1_a_at	1
GgaAffx.20239.1.S1_s_at	1		Cfa.10362.1.A1_at	1
Gga.4515.2.S1_at	1		Cfa.6024.1.A1_at	1
GgaAffx.21480.1.S2_at	1		Cfa.2850.1.S1_at	1
GgaAffx.12870.1.S1_at	1		Cfa.14793.1.A1_at	1
Gga.19611.1.S1_at	1		Cfa.15232.1.S1_a_at	1
Gga.17325.1.S1_at	1		CfaAffx.17223.1.S1_at	1
GgaAffx.26373.1.A1_at	1		Cfa.8529.1.A1_a_at	1
Gga.11741.4.A1_at	1		CfaAffx.9647.1.S1_at	1
Gga.7723.1.A1_at	1		Cfa.6897.1.A1_at	1
Gga.16899.1.S1_at	1		Cfa.6837.1.A1_at	1
GgaAffx.20584.1.S1_at	1		Cfa.5117.1.A1_at	1
Gga.14782.1.S1_at	1		Cfa.19815.1.S1_at	1
Gga.10452.1.S1_at	1		Cfa.8694.1.A1_at	1
GgaAffx.20837.1.S1_s_at	1		CfaAffx.24073.1.S1_at	1
Gga.16861.1.S1_at	1		CfaAffx.16238.1.S1_s_at	1
Gga.9656.1.A1_at	1		Cfa.19647.1.S1_at	1
Gga.4962.4.S1_at	1		Cfa.19676.1.A1_at	1
Gga.18627.1.A1_at	1		Cfa.20467.2.S1_a_at	1
Gga.19185.1.S1_at	1		Cfa.11058.1.A1_at	1
Gga.12716.1.S1_at	1		Cfa.5932.1.A1_at	1
Gga.13045.1.S1_at	1		Cfa.14340.1.A1_at	1
GgaAffx.1912.1.A1_at	1		Cfa.14430.1.S1_at	1
Gga.3602.3.S1_x_at	1		Cfa.7568.1.A1_at	1
Gga.10099.1.S1_at	1		Cfa.16827.1.A1_at	1
Gga.14677.1.S1_at	1		CfaAffx.28941.1.S1_at	1
Gga.14519.1.S1_at	1		Cfa.11319.1.A1_at	1
Gga.11072.1.A1_at	1		Cfa.2525.1.S1_at	1
Gga.13601.1.A1_at	1		Cfa.2132.1.A1_at	1
Gga.8403.1.S1_s_at	1		Cfa.699.1.S1_at	1
Gga.18847.1.S1_at	1		CfaAffx.236.1.S1_at	1
Gga.14361.1.S1_at	1		Cfa.9209.1.A1_at	1
Gga.13929.1.S1_at	1		Cfa.14455.1.A1_at	1
Gga.10528.2.A1_at	1		Cfa.13115.1.A1_s_at	1
GgaAffx.26269.1.S1_at	1		CfaAffx.820.1.S1_at	1
Gga.19461.1.S1_at	1		Cfa.254.1.S1_at	1
GgaAffx.8269.1.S1_at	1		Cfa.539.1.S1_at	1
Gga.8995.1.S1_at	1		CfaAffx.8963.1.S1_at	1
AY510475.CDS6.S1_s_at	1		Cfa.14061.1.A1_at	1
Gga.11189.1.A1_at	1		Cfa.11866.1.A1_at	1
Gga.12913.1.S1_a_at	1		Cfa.6762.1.A1_at	1
GgaAffx.8580.1.S1_at	1		Cfa.14435.1.A1_at	1
Gga.18051.1.S1_s_at	1		CfaAffx.12595.1.S1_s_at	1
Gga.13202.1.S1_at	1		Cfa.12740.1.S1_at	1
Gga.16256.1.S1_at	1		CfaAffx.348.1.S1_x_at	1
GgaAffx.21685.1.S1_at	1		CfaAffx.1056.1.S1_s_at	1
Gga.16006.1.S1_at	1		Cfa.5001.1.A1_at	1
GgaAffx.10237.1.S1_at	1		Cfa.14503.1.A1_at	1
Gga.7125.3.S1_at	1		Cfa.16744.1.S1_at	1
Gga.7462.1.S1_at	1		Cfa.7266.1.A1_at	1
GgaAffx.13015.1.S1_at	1		Cfa.7009.1.A1_at	1
Gga.15319.1.S1_at	1		Cfa.258.1.S1_at	1
GgaAffx.20460.1.S1_at	1		CfaAffx.25594.1.S1_at	1
Gga.8009.1.S1_at	1		Cfa.9779.1.A1_at	1
Gga.14351.1.S1_at	1		Cfa.5297.1.A1_at	1
Gga.14307.1.S1_at	1		Cfa.9967.1.A1_at	1
Gga.13187.1.S1_s_at	1		Cfa.13203.1.S1_at	1
Gga.18369.1.S1_at	1		CfaAffx.30118.1.S1_at	1
Gga.16926.1.S1_at	1		CfaAffx.20465.1.S1_at	1
Gga.18734.1.S1_at	1		Cfa.9674.1.A1_at	1
Gga.4193.1.S1_at	1		Cfa.5296.1.A1_at	1
Gga.10088.1.A1_at	1		CfaAffx.24871.1.S1_at	1
GgaAffx.24323.1.S1_s_at	1		Cfa.7907.2.A1_x_at	1
Gga.18030.1.A1_at	1		Cfa.9394.1.S1_at	1
Gga.13867.1.A1_at	1		Cfa.12766.1.A1_at	1
GgaAffx.20444.1.S1_at	1		CfaAffx.194.1.S1_at	1
GgaAffx.13099.1.S1_at	1		Cfa.4884.1.A1_at	1
Gga.14232.1.S1_at	1		CfaAffx.26125.1.S1_at	1
Gga.12811.1.S1_at	1		CfaAffx.22201.1.S1_at	1
Gga.8388.1.S1_at	1		CfaAffx.21020.1.S1_at	1
Gga.19604.1.S1_at	1		Cfa.20389.1.S1_at	1
Gga.14786.1.S1_at	1		Cfa.13906.1.A1_at	1
GgaAffx.5700.1.S1_at	1		Cfa.10516.1.A1_at	1
Gga.6083.1.S1_at	1		CfaAffx.32047.1.S1_at	1
Gga.7706.1.S1_at	1		Cfa.8375.1.A1_at	1
Gga.6219.2.S1_at	1		Cfa.5234.1.A1_at	1
Gga.4848.1.S1_a_at	1		CfaAffx.14176.1.S1_at	1
Gga.5596.2.A1_at	1		Cfa.13731.1.A1_at	1
NC-005264.CDS5.S1_at	1		Cfa.6430.1.A1_at	1
Gga.7703.1.S1_at	1		Cfa.4807.1.A1_at	1
GgaAffx.21661.1.S1_s_at	1		Cfa.3844.1.A1_at	1
Gga.10816.1.A1_at	1		Cfa.6915.1.A1_at	1
GgaAffx.5974.1.S1_at	1		RPTR-Cfa-X58791-1_s_at	1
Gga.15214.1.S1_at	1		Cfa.9052.1.A1_s_at	1
GgaAffx.7853.1.S1_x_at	1		Cfa.8398.1.A1_at	1
Gga.19782.1.S1_at	1		Cfa.3247.1.S1_at	1
Gga.2531.1.S1_at	1		Cfa.16388.3.A1_x_at	1
Gga.16750.1.S1_at	1		Cfa.7835.1.A1_at	1
Gga.15491.1.S1_at	1		Cfa.17451.1.S1_at	1
Gga.19575.1.A1_at	1		CfaAffx.6237.1.S1_at	1
GgaAffx.25538.2.S1_at	1		Cfa.15693.1.A1_at	1
GgaAffx.8962.4.S1_at	1		Cfa.14834.1.A1_at	1
Gga.19207.1.S1_at	1		Cfa.13822.1.A1_at	1
Gga.879.1.S1_at	1		CfaAffx.14839.1.S1_at	1
Gga.14764.1.S1_at	1		Cfa.13003.1.A1_at	1
Gga.13981.1.A1_at	1		CfaAffx.26353.1.S1_s_at	1
Gga.14940.1.A1_at	1		Cfa.6609.1.S1_at	1
AY562989.CDS1.S1_at	1		Cfa.13568.1.A1_at	1
GgaAffx.20255.1.S1_at	1		Cfa.9322.1.A1_at	1
Gga.18588.1.A1_at	1		Cfa.13321.1.A1_at	1
[truncated: 14,057 more rows]

## Sheet: Seqeunces of non-annoated probe
Chicken Genome array		Canine Genome 2.0 array
Probe Set ID	probe sequence	Probe Set ID	probe sequence
AF243438.CDS57.S1_s_at	TCACGTCGCGACGAAAGTTTATCCC	Cfa.10075.1.A1_at	GGCTCTTTCTGCACCAAAGCCAAGA
AF243438.CDS57.S1_s_at	GTTTATCCCGTCCAATTATCATTTT	Cfa.10075.1.A1_at	GGAGGGTCTCAACACCAGTCTGCAT
AF243438.CDS57.S1_s_at	GCAATGGCCATTACTTTGGCAGGTT	Cfa.10075.1.A1_at	GTGCCCACGGGAACCAGCTGGGAAT
AF243438.CDS57.S1_s_at	TTGGCAGGTTTTGGTTTGGTACTCG	Cfa.10075.1.A1_at	CTCTGTGCTTTACTATGAGGTACAT
AF243438.CDS57.S1_s_at	CAACTTTATTTTCCGCATGTGCAGC	Cfa.10075.1.A1_at	ATTTCCTGACAGCATTTTTCTTAGA
AF243438.CDS57.S1_s_at	TAGCAGCTGCCTATGTAGTGAAATC	Cfa.10075.1.A1_at	ATTCTTGGCCTGTTGTGTATGTTTT
AF243438.CDS57.S1_s_at	ATTATCGCATTTGTCGTGCAACGAC	Cfa.10075.1.A1_at	GATCACGCAACATCTATTTCAGTAG
AF243438.CDS57.S1_s_at	GTATGTCCTCGACTCAAGATGTCAA	Cfa.10075.1.A1_at	GAGTATGTGTTGCTTGAATTCTTGG
AF243438.CDS57.S1_s_at	TTGATGGTCAGATTCCTATGGTAGT	Cfa.10075.1.A1_at	ATTCTTGGGCAAGGCAGAGTCTGGA
AF243438.CDS57.S1_s_at	AATTCCAGTTGTTATTGCCTTGCAG	Cfa.10075.1.A1_at	AGCCATATGGCCCAGGTATGTTTTA
AF243438.CDS57.S1_s_at	TTTCAATATTTATCCCGTCACGTCG	Cfa.10075.1.A1_at	GAACGGGAGCTTTGTGGCTCTTTCT
AF218359.CDS1.S1_at	GTGGTGGTTTTTTGTTGATTATTAT	Cfa.10001.1.A1_at	ACACATGTTCGTCAATATTAGTAAA
AF218359.CDS1.S1_at	ATTTTTGCCATCTTCTACTGTTGTA	Cfa.10001.1.A1_at	AGAGTTACTCTGTGACAGGTGGCAC
AF218359.CDS1.S1_at	AAAGCGGACGCTGCACGGAGTGTTT	Cfa.10001.1.A1_at	GACAGGTGGCACTCGTCGTGAAGAT
AF218359.CDS1.S1_at	GAGTGTTTTCCACCGTGAGCTTGTA	Cfa.10001.1.A1_at	CTCGTCGTGAAGATGAGAACCCTAA
AF218359.CDS1.S1_at	TCCACCGTGAGCTTGTAGCACTGAG	Cfa.10001.1.A1_at	AAAAGGTCGAGATGAGGTGCAGCAC
AF218359.CDS1.S1_at	TTCGTGTAACGGTGCAACAGCTATC	Cfa.10001.1.A1_at	GATGAGGTGCAGCACGACTCTCCCT
AF218359.CDS1.S1_at	GCAACAGCTATCTTTGGTAACGTCC	Cfa.10001.1.A1_at	TGACACTGCGCCCAGGGACGTGCAC
AF218359.CDS1.S1_at	CTTTGGTAACGTCCATTGTCAGGCG	Cfa.10001.1.A1_at	GGACGTGCACGGCATTAGACCACAA
AF218359.CDS1.S1_at	CGTCCATTGTCAGGCGGCTCAAAAT	Cfa.10001.1.A1_at	AGTGAGATGCACAAAGTCTGTTGAG
AF218359.CDS1.S1_at	GGCTCAAAATACTGCCGGCGGCGAC	Cfa.10001.1.A1_at	GTCTGTTGAGACTTCAGAGAGTCAG
AF218359.CDS1.S1_at	GGCGGCGACTTGCAAGCTACCTCAT	Cfa.10001.1.A1_at	AATGGACGTCAGGACACATGTTCGT
AF243438.CDS83.S1_s_at	CGGTCATGTAGAGGGCGCGTGCGCA	AFFX-Cfa-r2-Ec-bioB-3_at	CTTTCTGCCGGACGCGAGCAGATGA
AF243438.CDS83.S1_s_at	CGCGTGCGCAGTCGGAGTTTTCCTA	AFFX-Cfa-r2-Ec-bioB-3_at	GCAGATGAACGAACAGACTCAGGCG
AF243438.CDS83.S1_s_at	GCAGTCGGAGTTTTCCTATTTTCGG	AFFX-Cfa-r2-Ec-bioB-3_at	GACTCAGGCGATGTGCTTTATGGCA
AF243438.CDS83.S1_s_at	TTTTCCTATTTTCGGCCCCGCGCAT	AFFX-Cfa-r2-Ec-bioB-3_at	GTGCTTTATGGCAGGCGCAAACTCG
AF243438.CDS83.S1_s_at	TAGAGGGCGCGTTCCTGATTTCCTT	AFFX-Cfa-r2-Ec-bioB-3_at	AGGCGCAAACTCGATTTTCTACGGT
AF243438.CDS83.S1_s_at	GCTACCCGTGCGTTTGGCACAAGTT	AFFX-Cfa-r2-Ec-bioB-3_at	GATTTTCTACGGTTGCAAACTGCTG
AF243438.CDS83.S1_s_at	TTGGCACAAGTTTGGCGGCAGCTCC	AFFX-Cfa-r2-Ec-bioB-3_at	GTTGCAAACTGCTGACCACGCCGAA
AF243438.CDS83.S1_s_at	GCAGCTCCAGCATCCGTTTTTGGAA	AFFX-Cfa-r2-Ec-bioB-3_at	GACCACGCCGAATCCGGAAGAAGAT
AF243438.CDS83.S1_s_at	GCATCCGTTTTTGGAACTCGATTCC	AFFX-Cfa-r2-Ec-bioB-3_at	TAAAGACCTGCAACTGTTCCGCAAA
AF243438.CDS83.S1_s_at	GAACTCGATTCCGATTACCGCAGGT	AFFX-Cfa-r2-Ec-bioB-3_at	TAAATCCGCAGCAAACTGCCGTGCT
AF243438.CDS83.S1_s_at	GATTACCGCAGGTCTCTCGGACTAG	AFFX-Cfa-r2-Ec-bioB-3_at	ACAACAGCAACGTCTTGAACAGGCG
AFFX-Gga-TrpnX-3_at	GGCGCGAGCTGTACTTATCGGTGAA	AFFX-Cfa-r2-Bs-phe-M_at	GGTTATTTAGGTCCAGCAGCTACAT
AFFX-Gga-TrpnX-3_at	AATATTGCGGTATTCGGTCACTAAA	AFFX-Cfa-r2-Bs-phe-M_at	TTACACATCTAGCAGTCAGTTCTTG
AFFX-Gga-TrpnX-3_at	AAAGGATTTGCAGCTTGCGGCGGAA	AFFX-Cfa-r2-Bs-phe-M_at	AAAACGGCGCCGAACATGTTGCTTA
AFFX-Gga-TrpnX-3_at	GCTTGCGGCGGAATCACAGGCTGAT	AFFX-Cfa-r2-Bs-phe-M_at	TACCGCACCATTCCGGAGTGTATAG
AFFX-Gga-TrpnX-3_at	ACGATGTCACGTATTGCCAAGAGCT	AFFX-Cfa-r2-Bs-phe-M_at	TAGATGCAGCCGTTGCAGGCGAAGT
AFFX-Gga-TrpnX-3_at	GAGCTTGAAGCTCGACGTCATTCAG	AFFX-Cfa-r2-Bs-phe-M_at	AACAGCCTTTGCCAATCGTGGGTGA
AFFX-Gga-TrpnX-3_at	GACGTCATTCAGCTTCACGGTGATG	AFFX-Cfa-r2-Bs-phe-M_at	TGAAATGACGTTGCCGATTCACCAG
AFFX-Gga-TrpnX-3_at	CTCTTCGCAAGCTGACAGGCTGTGA	AFFX-Cfa-r2-Bs-phe-M_at	GCTCGTCCATCCCTCAAGAGAGAAT
AFFX-Gga-TrpnX-3_at	GGAAGGCGCTTCACCATCAAGATAA	AFFX-Cfa-r2-Bs-phe-M_at	AATTTACTCACATTCACACGCGATT
AFFX-Gga-TrpnX-3_at	GTTGACGGCTTTGTGATTGATTCAT	AFFX-Cfa-r2-Bs-phe-M_at	ATTTCTTCATCGACATTTTCCTTCC
AFFX-Gga-TrpnX-3_at	AACTGGTGTTGCATTTTCTTGGGAA	AFFX-Cfa-r2-Bs-phe-M_at	CATTTTCCTTCCGTTCCATATGAAT
AFFX-Gga-actin-3_at	AACAAGACGAGATTGGCATGGCTTT	AFFX-r2-Bs-thr-M_s_at	TGAAATCCTTCACGCATATCAGCTG
AFFX-Gga-actin-3_at	TTGGCATGGCTTTATTTGTTTTTTC	AFFX-r2-Bs-thr-M_s_at	TATCAGCTGATCGCCCGTGTAGAAG
AFFX-Gga-actin-3_at	TTTCTTTTGGCGCTTGACTCAGGAT	AFFX-r2-Bs-thr-M_s_at	GTTCTTGCGCGTCTATCGCAGGAGT
AFFX-Gga-actin-3_at	GAAGGTGTCAGCAGCAGTCTTAAAA	AFFX-r2-Bs-thr-M_s_at	AGATCCGAACACAGCGGTCGACATT
AFFX-Gga-actin-3_at	TGAAACATGTTGGAGCGAACGCCCC	AFFX-r2-Bs-thr-M_s_at	AAATCAAGCCTGTCACATTGCCGAC
AFFX-Gga-actin-3_at	GTTCTACAATGCATCTGAGGACTTT	AFFX-r2-Bs-thr-M_s_at	GAACGAAGCCGACATGCTGTTCTCT
AFFX-Gga-actin-3_at	CTGAGGACTTTGATTGTACATTTGT	AFFX-r2-Bs-thr-M_s_at	TCTGTCACTGTTCCCGGAAGCACAG
AFFX-Gga-actin-3_at	TGGGAGGAGCCGGTACCAATTACTG	AFFX-r2-Bs-thr-M_s_at	GCCCCGGCTTTGATTCAGTCGGAAT
AFFX-Gga-actin-3_at	AACAAGTGTCTTTTTGTATCTTCCG	AFFX-r2-Bs-thr-M_s_at	TCAGTCGGAATGGCGCTCAGCAGAT
AFFX-Gga-actin-3_at	CAAAACACACTTGATCCTTTTTGGT	AFFX-r2-Bs-thr-M_s_at	GATAACCTGATCTACCAAGTGGCTA
AFFX-Gga-actin-3_at	ACAGTCTAGGAGTAAAGTGCCCAGT	AFFX-r2-Bs-thr-M_s_at	AAATGCCTCCTGTCCATGTGAAGGT
AFFX-LysX-5_at	GCAGACAAAATCAACATGGTCATTT	Cfa.10004.1.A1_at	GGTCCACTTGACCTCTGAATCAGGA
AFFX-LysX-5_at	TAGAAATCGGAGGTGTGGATGCTCT	Cfa.10004.1.A1_at	TCTGAATCAGGACACCCTCAACAGT
AFFX-LysX-5_at	AGGTGTGGATGCTCTCTATTTAGCG	Cfa.10004.1.A1_at	AGTCCTGCTGACTCCTGAATACAGT
AFFX-LysX-5_at	TGGATGCTCTCTATTTAGCGGAGAA	Cfa.10004.1.A1_at	GTCCAAGGAGACCACTTCTAATAGT
AFFX-LysX-5_at	TGGTACACCTCTTTACGTATATGAT	Cfa.10004.1.A1_at	CAGTCCCAGCCACTAGTCTAGAGTA
AFFX-LysX-5_at	CACCTCTTTACGTATATGATGTGGC	Cfa.10004.1.A1_at	GGATCTATCATTAGCCACTGGTTGC
AFFX-LysX-5_at	GTATATGATGTGGCTTTAATACGTG	Cfa.10004.1.A1_at	ACTGGTTGCTTTTGTACCCATTCTT
AFFX-LysX-5_at	TTTAAGCAGGCGTTTATTTCTGCAG	Cfa.10004.1.A1_at	GCTTCCTTGCCATTGCTGGGATAAT
AFFX-LysX-5_at	GCAGGCGTTTATTTCTGCAGGGCTG	Cfa.10004.1.A1_at	GCATGCCAGTCCCATTATTTCTAAG
AFFX-LysX-5_at	TTTATTTCTGCAGGGCTGAAAGCAC	Cfa.10004.1.A1_at	GAATGAAAGCCTGACCTTTGCCTTT
AFFX-LysX-5_at	GGGCTGAAAGCACAGGTGGCATATG	Cfa.10004.1.A1_at	CTGACCTTTGCCTTTCTGTAGAAAT
AFFX-LysX-5_at	GGCATATGCGAGCAAAGCATTCTCA	AFFX-Cfa-r2-Bs-lys-M_at	AGAACTGCGGATGGCGCTTGAGCAC
AFFX-LysX-5_at	ATGCGAGCAAAGCATTCTCATCAGT	AFFX-Cfa-r2-Bs-lys-M_at	CGCATCGGCTGCATTGTGGTGGATA
AFFX-LysX-5_at	GCAAAGCATTCTCATCAGTCGCAAT	AFFX-Cfa-r2-Bs-lys-M_at	TATGAAATCGCGCTTCTTGAAGACC
AFFX-LysX-5_at	CATTCTCATCAGTCGCAATGATTCA	AFFX-Cfa-r2-Bs-lys-M_at	AAGAAACGGGTCACTCCATCGATGT
AFFX-LysX-5_at	CATCAGTCGCAATGATTCAGCTCGC	AFFX-Cfa-r2-Bs-lys-M_at	ATCGATGTTCTTCTTCGGATCACGC
AFFX-LysX-5_at	TCGCAATGATTCAGCTCGCTGAGGA	AFFX-Cfa-r2-Bs-lys-M_at	GATCACGCCCGGAGTAGAAGCGCAT
AFFX-LysX-5_at	TCTTTAGATGTCGTATCCGGAGGAG	AFFX-Cfa-r2-Bs-lys-M_at	GAAGCGCATACGCATGACTACATTA
AFFX-LysX-5_at	ATGTCGTATCCGGAGGAGAGCTATA	AFFX-Cfa-r2-Bs-lys-M_at	GACTACATTACAACGGGCCAGGAAG
AFFX-LysX-5_at	GGAGAGCTATATACGGCTGTTGCAG	AFFX-Cfa-r2-Bs-lys-M_at	GGTTTCGATCTTCATAACGGACAAA
AF243438.CDS8.S1_s_at	GTGCGAACGCCGAGGTGAGCCAATC	AFFX-Cfa-r2-Bs-lys-M_at	ATCGGAACACATTCAGCTGCTGGGT
AF243438.CDS8.S1_s_at	TGTTATCACGTGACATGTACCGCCC	AFFX-Cfa-r2-Bs-lys-M_at	AGCTGCTGGGTGTCCATTGCCATAT
AF243438.CDS8.S1_s_at	GCCCCAAATTCGCACTTGAGTGTTG	AFFX-r2-TagF_at	ATTCGGCGGTGCCTCACAATATTCC
AF243438.CDS8.S1_s_at	GGCGGCTCGGCTCTTGTGTATAAAA	AFFX-r2-TagF_at	CAATTCGGGCTAGTCGTACCTGAAC
AF243438.CDS8.S1_s_at	AGCGGCGGTTGCGAGGTTCCTTCTC	AFFX-r2-TagF_at	AACGGGCATCAGTCGAATCTCTTCG
AF243438.CDS8.S1_s_at	AGGTTCCTTCTCTCTTCGCGATGCT	AFFX-r2-TagF_at	GTGTCACCACGCGGTACATGAGTCA
AF243438.CDS8.S1_s_at	TTCCTGTAAGGAACGCTACGCTAGG	AFFX-r2-TagF_at	AACCTATCCCTGAGTCTATATGCGT
AF243438.CDS8.S1_s_at	GAACGCTACGCTAGGCGACGAACGA	AFFX-r2-TagF_at	TGACACATCTCCTCGTTGGTAGTAC
AF243438.CDS8.S1_s_at	GACGAACGAGCTGAATTTCTCCCTT	AFFX-r2-TagF_at	AGCCCGCTATGGTGAGTCTAATCGC
AF243438.CDS8.S1_s_at	GAATTTCTCCCTTCATCAAATAAGT	AFFX-r2-TagF_at	GTCTAATCGCCGTTGGTCTGTATGC
AF243438.CDS8.S1_s_at	TATTATTGGACTCTGGTGCGAACGC	AFFX-r2-TagF_at	GTATGCAGTGCGGTATGGTTCCTCT
AF243438.CDS96.S1_s_at	AATCTCTGTCGAGGAGGCATCCAGT	AFFX-r2-TagF_at	TTCCTCTCAGTCACGTATGGTTCGC
AF243438.CDS96.S1_s_at	ATTTCACTAGTTGTTCTATGCGTCA	AFFX-r2-TagF_at	GGCGTCGGATTAGACCGGATCACCC
AF243438.CDS96.S1_s_at	ATCGGGTCTGGTATATGGATCCTTC	AFFX-Cfa-actin-5_s_at	TGGATGACGATATCGCTGCGCTTGT
AF243438.CDS96.S1_s_at	TGGATCCTTCGCAAACACCGCAAAA	AFFX-Cfa-actin-5_s_at	ATGACGATATCGCTGCGCTTGTGGT
AF243438.CDS96.S1_s_at	GACGTCGTCCATCAAGACGGGCATA	AFFX-Cfa-actin-5_s_at	GACGATATCGCTGCGCTTGTGGTCG
AF243438.CDS96.S1_s_at	TGTCAATGGTACAACACGGCTGTTA	AFFX-Cfa-actin-5_s_at	ATATCGCTGCGCTTGTGGTCGACAA
AF243438.CDS96.S1_s_at	GTAAACATCTACCAATCGTCGTCGA	AFFX-Cfa-actin-5_s_at	ATCGCTGCGCTTGTGGTCGACAACG
AF243438.CDS96.S1_s_at	ATCGTCGTCGAAACATCTATGCAAC	AFFX-Cfa-actin-5_s_at	GCTGCGCTTGTGGTCGACAACGGCT
AF243438.CDS96.S1_s_at	AATGACATCGGCCACTACTAATAAC	AFFX-Cfa-actin-5_s_at	GCGCTTGTGGTCGACAACGGCTCCG
AF243438.CDS96.S1_s_at	TACTAATAACATTACCACCTCCGTG	AFFX-Cfa-actin-5_s_at	CAGTTCGCCATGGATGACGATATCG
AF243438.CDS96.S1_s_at	GGATGGTTACACTGGACTCACTAAT	AFFX-Cfa-actin-5_s_at	GTTCGCCATGGATGACGATATCGCT
AF243438.CDS22.S1_s_at	ATTTATGCTCGTTCTGTGCTGGAAA	AFFX-Cfa-actin-5_s_at	TCGCCATGGATGACGATATCGCTGC
AF243438.CDS22.S1_s_at	GTGCTGGAAATTGCGCGATGTTACT	AFFX-Cfa-actin-5_s_at	CATGGATGACGATATCGCTGCGCTT
AF243438.CDS22.S1_s_at	GTTACTTGATTGACGCCCAAACTGC	AFFX-Cf_P450-2E1_5_s_at	TTTCCACTGCCCATCATTGGGAATA
AF243438.CDS22.S1_s_at	AAACTGCCTTAAAACGCCCTGTGCG	AFFX-Cf_P450-2E1_5_s_at	CCATCATTGGGAATATTCTGCAGGT
AF243438.CDS22.S1_s_at	AAATGTGCCTTGAGTGGGATCCAAA	AFFX-Cf_P450-2E1_5_s_at	ACCATGGCCGCCTTGGGCATCACAG
AF243438.CDS22.S1_s_at	GGGATCCAAAATTCTCACCATAGTC	AFFX-Cf_P450-2E1_5_s_at	GAATGTTCCCAAATCTCTCGCCAAG
AF243438.CDS22.S1_s_at	GAGCCATGCAGTGTCTTTATTTAAA	AFFX-Cf_P450-2E1_5_s_at	AAATCTCTCGCCAAGCTGGCAGAGC
AF243438.CDS22.S1_s_at	GATCTCTACACCCTCTTGATGAAAA	AFFX-Cf_P450-2E1_5_s_at	GTTCACCTTGTACCTGGGCTCCCAG
AF243438.CDS22.S1_s_at	ATATGCGCTATGATATTCGACGCCC	AFFX-Cf_P450-2E1_5_s_at	TCCCAGCGCACAGTGGTCCTGCATG
AF243438.CDS22.S1_s_at	GACGCCCGAAGTGGTACGACCTATT	AFFX-Cf_P450-2E1_5_s_at	CTACAAGGCGGTGAAGGAAGTTCTG
AF243438.CDS22.S1_s_at	AGCACTCTGGCCACGCGTAGAAGGT	AFFX-Cf_P450-2E1_5_s_at	AAGGAAGTTCTGCTTGACCACAAGA
AFFX-Gga-ef1a-3_s_at	AGAAGATTGATCGTCGTTCCGGCAA	AFFX-Cf_P450-2E1_5_s_at	TTTCTGGCAGAGGAGAAGTCTTCGC
AFFX-Gga-ef1a-3_s_at	TTGATCGTCGTTCCGGCAAGAAGCT	AFFX-Cf_P450-2E1_5_s_at	AGAAGTCTTCGCATTCCAGTCGCAC
AFFX-Gga-ef1a-3_s_at	AAGCTGGAGGATGGCCCGAAGTTCC	AFFX-Cf_P450-2E1_5_s_at	TCACAGTGGCCCTGCTGGTGTGGAT
AFFX-Gga-ef1a-3_s_at	GATGGCCCGAAGTTCCTGAAATCTG	AFFX-Cf_P450-2E1_5_s_at	CACGTTCAACAATGGGCCCGGCTGG
AFFX-Gga-ef1a-3_s_at	GCTGCCATTGTTGATATGATCCCTG	AFFX-Cf_P450-2E1_5_s_at	GAGCGGATCCAGAGGGAGATCCCCT
AFFX-Gga-ef1a-3_s_at	TTGATATGATCCCTGGCAAACCCAT	AFFX-Cf_P450-2E1_5_s_at	CCCTTCCTGCTGGAGGCGCTCAGGG
AFFX-Gga-ef1a-3_s_at	ATCCCTGGCAAACCCATGTGTGTTG	AFFX-Cf_P450-2E1_5_s_at	AAGCAGATCTACAGCCGCTGGAAAC
AFFX-Gga-ef1a-3_s_at	ACCCATGTGTGTTGAGAGCTTCTCT	Cfa.10043.1.A1_at	ATCCCATATCTTTAATGCCTTTGGT
AFFX-Gga-ef1a-3_s_at	TGAGAGCTTCTCTGATTATCCTCCT	Cfa.10043.1.A1_at	ATGCCTTTGGTCTTTAATTCTAACT
AFFX-Gga-ef1a-3_s_at	TGATTATCCTCCTCTGGGTCGTTTC	Cfa.10043.1.A1_at	GTCTTTAATTCTAACTTCTCTAATG
AFFX-Gga-ef1a-3_s_at	CTCTGGGTCGTTTCGCTGTGCGTGA	Cfa.10043.1.A1_at	TGAGAATATTGCTGACCCTGCTTTC
AF243438.CDS99.S1_s_at	ATGCAGCGCCAAACCGGACATATGG	Cfa.10043.1.A1_at	ATGTGCTTTATAACCTTAAGCTGAA
AF243438.CDS99.S1_s_at	TAATGAGCCCATTTTGATTCCGTCT	Cfa.10043.1.A1_at	TGAAATTTTGTTTTAGGTGTCACTC
AF243438.CDS99.S1_s_at	TTTGATTCCGTCTACCATCGCAGAT	Cfa.10043.1.A1_at	GTGTCACTCTTATTACCAGAAGCCT
AF243438.CDS99.S1_s_at	CGTCTACCATCGCAGATCTCGAGGG	Cfa.10043.1.A1_at	ACCAGAAGCCTTTTGATCCAACTAT
AF243438.CDS99.S1_s_at	TGGTCCGAAAATTCCGTGGTCGTCT	Cfa.10043.1.A1_at	TGATCCAACTATTATGCTCTCTGCC
AF243438.CDS99.S1_s_at	TGGTCGTCTACTGCCCTTTGAAAAG	Cfa.10043.1.A1_at	TGCTCTCTGCCTTTCAGTAGGTAAT
AF243438.CDS99.S1_s_at	AAAGTGTCCCGATTTTTGTCTGAGA	Cfa.10043.1.A1_at	GTAGGTAATTTTTATCCATGTGCAT
AF243438.CDS99.S1_s_at	GTTTGGAGGCCAGCTTTCATAAAGG	AFFX-r2-P1-cre-3_at	AAGATATCTCACGTACTGACGGTGG
AF243438.CDS99.S1_s_at	GAAGCACTTTATTTACCACAACCTG	AFFX-r2-P1-cre-3_at	GTTAATCCATATTGGCAGAACGAAA
AF243438.CDS99.S1_s_at	AAGAGAACCGGTTTGGAATCGCAGG	AFFX-r2-P1-cre-3_at	AACGAAAACGCTGGTTAGCACCGCA
AF243438.CDS99.S1_s_at	GGGACCGAGAATGCTTTTTCAGATG	AFFX-r2-P1-cre-3_at	CGCTGGTTAGCACCGCAGGTGTAGA
AF243438.CDS25.S1_s_at	AAGTAGGCCATTCTGCATACCATGC	AFFX-r2-P1-cre-3_at	GGTCGAGCGATGGATTTCCGTCTCT
AF243438.CDS25.S1_s_at	TACCATGCCGCACAGTCAAGAATTA	AFFX-r2-P1-cre-3_at	TAGCTGATGATCCGAATAACTACCT
AF243438.CDS25.S1_s_at	GAGATGCATCACTTGACGTTGAATA	AFFX-r2-P1-cre-3_at	ATGATCCGAATAACTACCTGTTTTG
AF243438.CDS25.S1_s_at	AGAACATGAGTTCCCGCGTATGGTT	AFFX-r2-P1-cre-3_at	ATAACTACCTGTTTTGCCGGGTCAG
AF243438.CDS25.S1_s_at	GTATACCCATATTTGCAAATCCCCG	AFFX-r2-P1-cre-3_at	CTGTTTTGCCGGGTCAGAAAAAATG
AF243438.CDS25.S1_s_at	GTAGCTTCTGGATACTTCGGAAACA	AFFX-r2-P1-cre-3_at	AAAAAATGGTGTTGCCGCGCCATCT
AF243438.CDS25.S1_s_at	AAGATTGTTCCATTTCTAGCTACAT	AFFX-r2-P1-cre-3_at	CCAGCTATCAACTCGCGCCCTGGAA
AF243438.CDS25.S1_s_at	TCGGTGCTTTTCATTGTTCGTCGAT	Cfa.10072.1.A1_at	GTTTGGCTGAATGCTTACCGTTCAC
AF243438.CDS25.S1_s_at	AAGCAATCCCTGTCATTCTAATCAT	Cfa.10072.1.A1_at	AAAGCACGGTGCTCGCTGCAGTAGG
AF243438.CDS25.S1_s_at	GTCATTCTAATCATCACTCCTGTGA	Cfa.10072.1.A1_at	GACTTTCAAACCGACTTGGGCTCAT
AF243438.CDS25.S1_s_at	TGTGTAGACTACTTTCGACCCGATA	Cfa.10072.1.A1_at	AGGAGAGTTGAGTCCCATCCCTGAG
AF243438.CDS51.S1_s_at	GGGCCGATTTTGCTGGTTTAACACG	Cfa.10072.1.A1_at	GCACTCCCTGGTTTTTTAATCTCGA
AF243438.CDS51.S1_s_at	TTAACACGTCTGCAAAATTCACTGG	Cfa.10072.1.A1_at	CAAGTAATTTCTGTCCGTCTTTTCT
AF243438.CDS51.S1_s_at	AATTCACTGGATCTGCACATTAGGA	Cfa.10072.1.A1_at	TGCCCCTTTGCCTTAAATACTTCAG
AF243438.CDS51.S1_s_at	GACATCATGTAATACTCCACCAGGA	Cfa.10072.1.A1_at	ATTGCTTGACATCATGCGGTTCCCT
AF243438.CDS51.S1_s_at	CAGGACATTTGTTGGCTTTTGGGAA	Cfa.10072.1.A1_at	ATGCGGTTCCCTTATGGCTGAGCCT
AF243438.CDS51.S1_s_at	GATGGACCATGATCTGGCCTCGATT	Cfa.10072.1.A1_at	TGAGCCTTCCTCTTATTTCCAGACA
AF243438.CDS51.S1_s_at	ACAGATGATAAATCCGTGGCCGGTG	Cfa.10072.1.A1_at	TTCTTCCATTTCACTCAGAGCTGGA
AF243438.CDS51.S1_s_at	AGAATCTGTGATGCGGGACTACCCA	AFFX-BioB-3_at	ATATTACAACGCGGCAGCATTATGA
AF243438.CDS51.S1_s_at	ACACTCGTAGTTACCTTGTCATCAA	AFFX-BioB-3_at	GGTCGCGCGGATCATGATGCCAACC
AF243438.CDS51.S1_s_at	AAACTTTTGTACACTGGACATCGAA	AFFX-BioB-3_at	GGATCATGATGCCAACCTCTTACGT
AF243438.CDS51.S1_s_at	GGACATCGAAACTATAGCTCCAGAT	AFFX-BioB-3_at	TGCCAACCTCTTACGTGCGCCTTTC
AF243438.CDS38.S1_s_at	TACTTCACCGTTTGCTTTGGAACAC	AFFX-BioB-3_at	GCGCCTTTCTGCCGGACGCGAGCAG
AF243438.CDS38.S1_s_at	ACTAATATCTATTCGGCCAGGGTAA	AFFX-BioB-3_at	GCCGGACGCGAGCAGATGAACGAAC
AF243438.CDS38.S1_s_at	CATTCGTTCCGGGTATAGTTCCAGA	AFFX-BioB-3_at	CGAGCAGATGAACGAACAGACTCAG
AF243438.CDS38.S1_s_at	AGATATGTAGCTCCCATGTATGGTA	AFFX-BioB-3_at	GATGAACGAACAGACTCAGGCGATG
AF243438.CDS38.S1_s_at	GGTAGCTTTGTGTTTGGACGTCCCA	AFFX-BioB-3_at	AACAGACTCAGGCGATGTGCTTTAT
AF243438.CDS38.S1_s_at	ACGTCCCACTTTTCAGCGGAGGTAT	AFFX-BioB-3_at	TCAGGCGATGTGCTTTATGGCAGGC
AF243438.CDS38.S1_s_at	GAGCACCATTATCACGTGTCGTTGA	AFFX-BioB-3_at	GTGCTTTATGGCAGGCGCAAACTCG
AF243438.CDS38.S1_s_at	TCTGGGTAAATATCAAGCCTCTCTT	AFFX-BioB-3_at	ATGGCAGGCGCAAACTCGATTTTCT
AF243438.CDS38.S1_s_at	AGCCTCTCTTGTAAAGCTCATTTCC	AFFX-BioB-3_at	TACGGTTGCAAACTGCTGACCACGC
AF243438.CDS38.S1_s_at	ACAGCGCATGATTTGGTGACCCTTC	AFFX-BioB-3_at	CAAACTGCTGACCACGCCGAATCCG
AF243438.CDS38.S1_s_at	GCAGCCGCTTGTTCGAGACTAAGAA	AFFX-BioB-3_at	GACCTGCAACTGTTCCGCAAACTGG
AFFX-r2-TagG_at	GTGACATGAGTCTAGCTTCGCGGTC	AFFX-BioB-3_at	GGGCTAAATCCGCAGCAAACTGCCG
AFFX-r2-TagG_at	GCCTGCGAATGAGTCGTCAGTGCCC	AFFX-BioB-3_at	CGCAGCAAACTGCCGTGCTGGCAGG
AFFX-r2-TagG_at	GTGCGCCGAATGTGTCTGTAATGCC	AFFX-BioB-3_at	ACAGCAACGTCTTGAACAGGCGCTG
AFFX-r2-TagG_at	GACATCTACGGGCGGCTATTGACGA	AFFX-BioB-3_at	CGTCTTGAACAGGCGCTGATGACCC
AFFX-r2-TagG_at	TTGACGAACTCTCCGGTATATGCTC	AFFX-BioB-3_at	ACAGGCGCTGATGACCCCGGACACC
AFFX-r2-TagG_at	GCTGATACGCTAGGGTGCTTGCTAC	AFFX-r2-TagQ-3_at	GATTCGCACGACTTCAGAGGATGGC
AFFX-r2-TagG_at	ATATGGCGACTGTGTCCGTCTATAC	AFFX-r2-TagQ-3_at	GTGATGTTCTCGGATCGACACTGCT
AFFX-r2-TagG_at	GAGCGTCTCCTAAATAGATCCGGTC	AFFX-r2-TagQ-3_at	GACACTGCTGGTCTGCGAATGACTC
AFFX-r2-TagG_at	AGATCCGGTCTTATCGCTGAATGTC	AFFX-r2-TagQ-3_at	GGATGCACGTTATCGTCGAGTGGCC
AFFX-r2-TagG_at	GATCCTCGCTAAGTATTCAGCCACC	AFFX-r2-TagQ-3_at	GCGGCCTATGTCTCATTAGCGAGTC
AFFX-r2-TagG_at	TCAGCCACCTCGTATAGTATTCGCG	AFFX-r2-TagQ-3_at	GTAGACCGACGTTATCGCGCTATAC
AFFX-Gga-r2-Bs-dap-5_at	ATCTGATGTGATGCCTGTTGAGTCA	AFFX-r2-TagQ-3_at	GCTATACCCGATGTCAACGCGAGTT
AFFX-Gga-r2-Bs-dap-5_at	GAGTCAGATGCTTTCATTTACACAG	AFFX-r2-TagQ-3_at	GTCAAGCGTGCTCCTACGTTAGTAT
AFFX-Gga-r2-Bs-dap-5_at	AACACAACCGGATGTCTTGATTGAT	AFFX-r2-TagQ-3_at	GTATCAGTTTCCCTATTGGTACGTC
AFFX-Gga-r2-Bs-dap-5_at	TGATTGATTTAACAACGCCCGAAAT	AFFX-r2-TagQ-3_at	ATATGGGCTCGGTTGACCTCTATTG
AFFX-Gga-r2-Bs-dap-5_at	TTGCATTAGAGCACGGAGTCCGTCC	AFFX-r2-TagQ-3_at	TAGGCAAACGTCTGTCGGTCATGGC
AFFX-Gga-r2-Bs-dap-5_at	GAGTCCGTCCAGTTGTCGGAACAAC	AFFX-r2-Ec-bioC-3_at	CGCTGGTGCAGGGATCGTTACCCGA
AFFX-Gga-r2-Bs-dap-5_at	GGAACAACCGGTTTCTCAGAAGCTG	AFFX-r2-Ec-bioC-3_at	GTGGACGAGCGTCCGCATGCTAATC
AFFX-Gga-r2-Bs-dap-5_at	AAAGGGATCGGAGCCATCATCGCGC	AFFX-r2-Ec-bioC-3_at	ACCGCCAGATGAAATCGAACAGTCG
AFFX-Gga-r2-Bs-dap-5_at	CAAATTTTGCGCTCGGTGCGATACT	AFFX-r2-Ec-bioC-3_at	GAACGGCGTGCATTATCAACATCAT
AFFX-Gga-r2-Bs-dap-5_at	AAATGGCTGCCAACTATTTTGAGGA	AFFX-r2-Ec-bioC-3_at	ATCAACATCATATTCAGCCCATCAC
AFFX-Gga-r2-Bs-dap-5_at	GATTATTGAGCTTCATCATGACCAG	AFFX-r2-Ec-bioC-3_at	TCATATTCAGCCCATCACGCTGTGG
AF243438.CDS64.S1_s_at	ATTTTTGGGAGTCTACGTGTTCTGC	AFFX-r2-Ec-bioC-3_at	CACGCTGTGGTTTGATGATGCGCTC
AF243438.CDS64.S1_s_at	CGTGTTCTGCAGTAGGCGTGTCAAT	AFFX-r2-Ec-bioC-3_at	AGTGCCATGCGTTCGCTGAAAGGCA
AF243438.CDS64.S1_s_at	GTCAATAGCTTTTTCATCTGGGTTT	AFFX-r2-Ec-bioC-3_at	CGGTGCCACGCATCTTCATGAAGGG
AF243438.CDS64.S1_s_at	ATCTGGGTTTTCTGTGCTGTTTTAT	AFFX-r2-Ec-bioC-3_at	TATTAACGCGTTCGCAGTTGCAGCG
AF243438.CDS64.S1_s_at	ATATGGGTCTGGTGGCGGTAATCTC	AFFX-r2-Ec-bioC-3_at	CAGCGATTGCAACTGGCCTGGCCGC
AF243438.CDS64.S1_s_at	TTAGCGGGTTCGTATCACGCATGCT	AFFX-TrpnX-M_at	GATTTCGGTTTCACAAATGGCAGAC
AF243438.CDS64.S1_s_at	GTATCACGCATGCTTTCGACTATTC	AFFX-TrpnX-M_at	TTTCACAAATGGCAGACTTGAAGAT
AF243438.CDS64.S1_s_at	TTCGACTATTCACCGCAGATATGTT	AFFX-TrpnX-M_at	TTTACAGGTGCAGTCACCGAAAGAG
AF243438.CDS64.S1_s_at	TCTGTAGTTTAGTTATCGGCGTTGC	AFFX-TrpnX-M_at	CACCGAAAGAGAGCGCCTATCTCAT
AF243438.CDS64.S1_s_at	GTTGCTATTTTGATTGCCACTTCGC	AFFX-TrpnX-M_at	AAGAGAGCGCCTATCTCATTCAGAA
AF243438.CDS64.S1_s_at	ACTTCGCAAGCGACGTTTGTCGATT	AFFX-TrpnX-M_at	GAGCGCCTATCTCATTCAGAATATT
AF243438.CDS2.S1_s_at	TTATTGCGGAGCGTGCCGAGGCAGA	AFFX-TrpnX-M_at	GCAGCAGTTCCGCTTTATCTATTAC
AF243438.CDS2.S1_s_at	AGAGGACGGCTCCTGCCGGGACAGG	AFFX-TrpnX-M_at	GCTTTTAATGCGGGAGCTGCGATTT
AF243438.CDS2.S1_s_at	GGGCCCGTTCGGTCTACTCACAGAG	AFFX-TrpnX-M_at	TTAGAGACGATTACAAGCGGAGGCG
AF243438.CDS2.S1_s_at	TCAACGGCTCCAACGGTCGTGCGCG	AFFX-TrpnX-M_at	AGACGATTACAAGCGGAGGCGCTGC
AF243438.CDS2.S1_s_at	GCCGCTCCCGTGTTGCTCTGCTGGG	AFFX-TrpnX-M_at	GATTACAAGCGGAGGCGCTGCCGCG
AF243438.CDS2.S1_s_at	AAGCCCCAGGGCCACGTCTTTGTGC	AFFX-TrpnX-M_at	CCGCGCAGCTTGAACGACTAAAGCA
AF243438.CDS2.S1_s_at	GCCGAGGCTGACAGAGGCGAACTCT	AFFX-TrpnX-M_at	GCAGCTTGAACGACTAAAGCAGAAA
AF243438.CDS2.S1_s_at	TGACAGAGGCGAACTCTTCGCGGCG	AFFX-TrpnX-M_at	GAGCAGCCTTTCGAGAAACGTTCAT
AF243438.CDS2.S1_s_at	AGGGCCACGTCTTTGTGCACGCTCA	AFFX-TrpnX-M_at	GAGGCGCTGGCAAGCCCGAATCGGT
AF243438.CDS2.S1_s_at	TTGTGCACGCTCATGCCCTGCACGG	AFFX-TrpnX-M_at	TTAAAGAGGATTTTGTGCCTGTGCA
AF243438.CDS2.S1_s_at	TGCCCACGCTTATTGCGGAGCGTGC	AFFX-TrpnX-M_at	TTTTGTGCCTGTGCAGATTGCAATA
AF243438.CDS90.S1_s_at	ATATGGCAGTGACTCGTCCGATCAA	AFFX-TrpnX-M_at	GCAGATTGCAATAGACTATGAGGCT
AF243438.CDS90.S1_s_at	GGCAAATTTTGTCCTCTACCATGGA	AFFX-TrpnX-M_at	ATAGACTATGAGGCTGCGAAGGCAG
AF243438.CDS90.S1_s_at	ATGGAAACCCGATGTCGCTCGGTTA	AFFX-TrpnX-M_at	ACTATGAGGCTGCGAAGGCAGATGC
AF243438.CDS90.S1_s_at	GATCGAGATCGAGCCAGACCCGATA	AFFX-Cfa-ef1a-M_x_at	AAAATGGATTCCACTGAACCACCCT
AF243438.CDS90.S1_s_at	GACTAAATAGCGGTCCGTTCCACGA	AFFX-Cfa-ef1a-M_x_at	GCCAGAAGAGATACGAGGAAATCGT
AF243438.CDS90.S1_s_at	TATCATGAATTTGACCCCACGCCAA	AFFX-Cfa-ef1a-M_x_at	TTGCGTCTGCCTCTCCAAGACGTCT
AF243438.CDS90.S1_s_at	ACATCTGCGCAGGACTCTGAGGGAT	AFFX-Cfa-ef1a-M_x_at	CGTGACCATCATTGATGCCCCAGGA
AF243438.CDS90.S1_s_at	GGATGCTGATAGTCGAAGCGCCCAT	AFFX-Cfa-ef1a-M_x_at	GTGACCATCATTGATGCCCCAGGAC
AF243438.CDS90.S1_s_at	ATCCGATATATATGCCTCCGATAGC	AFFX-Cfa-ef1a-M_x_at	TGACCATCATTGATGCCCCAGGACA
AF243438.CDS90.S1_s_at	ATAGCATTTTTCACCCAATCGCTGC	AFFX-Cfa-ef1a-M_x_at	GACCATCATTGATGCCCCAGGACAC
AF243438.CDS90.S1_s_at	CGTCCTCGGGAACTATTTCTTCAGA	AFFX-Cfa-ef1a-M_x_at	CCATCATTGATGCCCCAGGACACAG
AFFX-r2-Ec-bioB-5_at	CATTTCGATCCTCGTCAGGTGCAGG	AFFX-Cfa-ef1a-M_x_at	CATCATTGATGCCCCAGGACACAGA
AFFX-r2-Ec-bioB-5_at	TTTCGATCCTCGTCAGGTGCAGGTC	AFFX-Cfa-ef1a-M_x_at	TGATGCCCCAGGACACAGAGACTTT
AFFX-r2-Ec-bioB-5_at	TTCGATCCTCGTCAGGTGCAGGTCA	AFFX-Cfa-ef1a-M_x_at	CCAGGACACAGAGACTTTATCAAAA
AFFX-r2-Ec-bioB-5_at	TCGATCCTCGTCAGGTGCAGGTCAG	AFFX-LysX-5_at	GCAGACAAAATCAACATGGTCATTT
AFFX-r2-Ec-bioB-5_at	TCGCGCTACAAAACCGGGCTGGAAG	AFFX-LysX-5_at	TAGAAATCGGAGGTGTGGATGCTCT
AFFX-r2-Ec-bioB-5_at	CGCGCTACAAAACCGGGCTGGAAGC	AFFX-LysX-5_at	AGGTGTGGATGCTCTCTATTTAGCG
AFFX-r2-Ec-bioB-5_at	AAGCCGAGCGGTTGATGGAAGTTGA	AFFX-LysX-5_at	TGGATGCTCTCTATTTAGCGGAGAA
AFFX-r2-Ec-bioB-5_at	GAGCGGTTGATGGAAGTTGAACAGG	AFFX-LysX-5_at	TGGTACACCTCTTTACGTATATGAT
AFFX-r2-Ec-bioB-5_at	CGGCAGGATCGACGCGCTTCTGTAT	AFFX-LysX-5_at	CACCTCTTTACGTATATGATGTGGC
AFFX-r2-Ec-bioB-5_at	GCTGGATCTGCTGTTTGAAGCGCAG	AFFX-LysX-5_at	GTATATGATGTGGCTTTAATACGTG
AFFX-r2-Ec-bioB-5_at	CTGGATCTGCTGTTTGAAGCGCAGC	AFFX-LysX-5_at	TTTAAGCAGGCGTTTATTTCTGCAG
AFFX-Gga-r2-P1-cre-3_s_at	GATATCTCACGTACTGACGGTGGGA	AFFX-LysX-5_at	GCAGGCGTTTATTTCTGCAGGGCTG
AFFX-Gga-r2-P1-cre-3_s_at	GGAGAATGTTAATCCATATTGGCAG	AFFX-LysX-5_at	TTTATTTCTGCAGGGCTGAAAGCAC
AFFX-Gga-r2-P1-cre-3_s_at	TATTGGCAGAACGAAAACGCTGGTT	AFFX-LysX-5_at	GGGCTGAAAGCACAGGTGGCATATG
AFFX-Gga-r2-P1-cre-3_s_at	AACGCTGGTTAGCACCGCAGGTGTA	AFFX-LysX-5_at	GGCATATGCGAGCAAAGCATTCTCA
AFFX-Gga-r2-P1-cre-3_s_at	GGGTAACTAAACTGGTCGAGCGATG	AFFX-LysX-5_at	ATGCGAGCAAAGCATTCTCATCAGT
AFFX-Gga-r2-P1-cre-3_s_at	GGTCGAGCGATGGATTTCCGTCTCT	AFFX-LysX-5_at	GCAAAGCATTCTCATCAGTCGCAAT
AFFX-Gga-r2-P1-cre-3_s_at	ATTTCCGTCTCTGGTGTAGCTGATG	AFFX-LysX-5_at	CATTCTCATCAGTCGCAATGATTCA
AFFX-Gga-r2-P1-cre-3_s_at	GTCTCTGGTGTAGCTGATGATCCGA	AFFX-LysX-5_at	CATCAGTCGCAATGATTCAGCTCGC
AFFX-Gga-r2-P1-cre-3_s_at	TGATGATCCGAATAACTACCTGTTT	AFFX-LysX-5_at	TCGCAATGATTCAGCTCGCTGAGGA
AFFX-Gga-r2-P1-cre-3_s_at	ATCCGAATAACTACCTGTTTTGCCG	AFFX-LysX-5_at	TCTTTAGATGTCGTATCCGGAGGAG
AFFX-Gga-r2-P1-cre-3_s_at	AAAAAATGGTGTTGCCGCGCCATCT	AFFX-LysX-5_at	ATGTCGTATCCGGAGGAGAGCTATA
AF243438.CDS5.S1_s_at	CGGTAACAGGACACAATGCAGGGAA	AFFX-LysX-5_at	GGAGAGCTATATACGGCTGTTGCAG
AF243438.CDS5.S1_s_at	TGCAGGGAAGATGCCCTCCGGAGAT	AFFX-BioDn-3_at	GGTGCTGGCGGCTGGTTTACGCCGC
AF243438.CDS5.S1_s_at	TCGAGCAGAGCTGGGCGCAAAGCTC	AFFX-BioDn-3_at	CTTTCTGACACTTTCACTTTTGCAG
AF243438.CDS5.S1_s_at	GCGCAAAGCTCCTCCGCATCGGGAG	AFFX-BioDn-3_at	TGACACTTTCACTTTTGCAGATTGG
AF243438.CDS5.S1_s_at	GAAGGCCCCGGAGCGTAGATAATAT	AFFX-BioDn-3_at	TTTGCAGATTGGGTAACACAGGAAC
AF243438.CDS5.S1_s_at	TCGAGCAGAGCTGGGCGCAAAGTTC	AFFX-BioDn-3_at	GAAAACGTCACGCTGAATATATGAC
AF243438.CDS5.S1_s_at	GGCGCAAAGTTCCTCCGTATCGGGA	AFFX-BioDn-3_at	AAACGTCACGCTGAATATATGACCA
AF243438.CDS5.S1_s_at	GAACCTGGCCAACAGGACAAAGCTG	AFFX-BioDn-3_at	CGTCACGCTGAATATATGACCACGC
AF243438.CDS5.S1_s_at	ATGTGGAGCGTTAGGTTCATCCGGT	AFFX-BioDn-3_at	ACGCTGAATATATGACCACGCTCAC
AF243438.CDS5.S1_s_at	CAAAGCTGAGCGTAAACCGTCCCCG	AFFX-BioDn-3_at	CTGAATATATGACCACGCTCACCCG
AF243438.CDS5.S1_s_at	GTACACGGCTCGGTAACAGGACACA	AFFX-BioDn-3_at	GAATATATGACCACGCTCACCCGCA
AF243438.CDS67.S1_s_at	TATTGTGGCCCATTTCGAACCTAAA	AFFX-BioDn-3_at	CCCGCATGATTCCCGCGCCGCTGCT
AF243438.CDS67.S1_s_at	TATCCCGCTAGAAAAGGCCGCCATA	AFFX-BioDn-3_at	CATGATTCCCGCGCCGCTGCTGGGA
AF243438.CDS67.S1_s_at	TATCTTTATCAATAGCTCTCAGGGA	AFFX-BioDn-3_at	GATTCCCGCGCCGCTGCTGGGAGAG
AF243438.CDS67.S1_s_at	GATTGTGCTGCCATTACAACATTTG	AFFX-BioDn-3_at	CGCGCCGCTGCTGGGAGAGATCCCC
AF243438.CDS67.S1_s_at	AAAATCTTTCTGTCTCGTGTTGTGT	AFFX-BioDn-3_at	CCGCTGCTGGGAGAGATCCCCTGGC
AF243438.CDS67.S1_s_at	CAAATCGGATTGGATCCTGCTGCAG	AFFX-BioDn-3_at	CTGCTGGGAGAGATCCCCTGGCTTG
AF243438.CDS67.S1_s_at	TGCTGCAGCTAATCCCCAATAAAAC	AFFX-BioDn-3_at	GCTGGGAGAGATCCCCTGGCTTGCA
AF243438.CDS67.S1_s_at	AGTGCACGTTCTTATTTGGCTCTGA	AFFX-BioDn-3_at	GGAGAGATCCCCTGGCTTGCAGAAA
AF243438.CDS67.S1_s_at	GCTCTGAACGTCGATGCGCATGGTA	AFFX-BioDn-3_at	GAGATCCCCTGGCTTGCAGAAAATC
AF243438.CDS67.S1_s_at	ATTCAACAGTGTTTTGCGGCCAAGT	AFFX-BioDn-3_at	ATCCCCTGGCTTGCAGAAAATCCAG
AF243438.CDS67.S1_s_at	TAAACTTCGCACACTTTTCACGGTA	Cfa.10088.1.A1_at	CTGTGTTTGCCTGCCACCAGTAATA
AF243438.CDS93.S1_s_at	GAACTGGAGTTCGTGGTACCGGATT	Cfa.10088.1.A1_at	GTAGTCCAATGTCTTTATTCACCAG
AF243438.CDS93.S1_s_at	AGGGATTCGTTTATAGTGCGGCTAT	Cfa.10088.1.A1_at	TTTTAGGAGCTTCTCGATTCCAGTC
AF243438.CDS93.S1_s_at	GAAGTTTCTGGTAATGCTCCACATA	Cfa.10088.1.A1_at	GATTCCAGTCTGTCCAGTACAAGTT
AF243438.CDS93.S1_s_at	GCGCTCGAATGTATTCCTTTGCCAA	Cfa.10088.1.A1_at	AGAGTCTGAGTTTGGTTACTTTCAC
AF243438.CDS93.S1_s_at	TGGGCCATTCCCGACAATATTCAAA	Cfa.10088.1.A1_at	ATAAACCTGTGGCTTCAACATGAAG
AF243438.CDS93.S1_s_at	CAAACTCTCTTGACATCTACATGGG	Cfa.10088.1.A1_at	AATGCATTACTGAAGGAGACCCGCC
AF243438.CDS93.S1_s_at	GACACCCCAGAAGATAGAGCGCATT	Cfa.10088.1.A1_at	GAGACCCGCCTCATTCAAGGTTAAA
AF243438.CDS93.S1_s_at	GGAAATCGAACCACCTCAAATGAGT	Cfa.10088.1.A1_at	TTAAATGTTAGCCTGGCCTGGTCAC
AF243438.CDS93.S1_s_at	AATGAGTAGTACACCCGGCAGATTA	Cfa.10088.1.A1_at	AGTCCCTCTCACATAGTCTCTGAAT
AF243438.CDS93.S1_s_at	GATGCGATTGCAATTCCGGTTCGTT	Cfa.10088.1.A1_at	AAATCTGTGGTAGAGTGCTGGCCCC
AF243438.CDS93.S1_s_at	CCGGTTCGTTACACTGCGACAGGAA	Cfa.10014.1.A1_at	AATGAGTTTTGCCTTCACCCAGTTT
AFFX-PheX-3_at	AAGTTTGTCAGTGACCATCCCGAGC	Cfa.10014.1.A1_at	GGTTTGGTCAAAGATACCTTCTATC
AFFX-PheX-3_at	GTCAGTGACCATCCCGAGCTGAATA	Cfa.10014.1.A1_at	AGTAGCAACTTGTACCAGTGGCATA
AFFX-PheX-3_at	CCATCCCGAGCTGAATATCGGGGTC	Cfa.10014.1.A1_at	GTGGCATAGTCCTGCAACACTCAGA
AFFX-PheX-3_at	GAGCTGAATATCGGGGTCATTGCCA	Cfa.10014.1.A1_at	AAACGATTTTACACCACTCTGGAAG
AFFX-PheX-3_at	TATCGGGGTCATTGCCAATGATATG	Cfa.10014.1.A1_at	AATCAGATTAAAACAGCCCTCCAAC
AFFX-PheX-3_at	GCCAATGATATGGCAGCTTCTACAT	Cfa.10014.1.A1_at	AGCCCTCCAACAAGTCCATAAAACT
AFFX-PheX-3_at	ATGGCAGCTTCTACATACGAATTAA	Cfa.10014.1.A1_at	TTAGAAACTCCAATGGCAGCCCTCT
AFFX-PheX-3_at	CTGTCTCCCGATGAAAACATATCTT	Cfa.10014.1.A1_at	TCTTCGGGAGTTTTGTACTATCACT
AFFX-PheX-3_at	GAATTCAAAATTGAGCTCTAGGCCC	Cfa.10014.1.A1_at	TTGGCTCAGAGCTCAACCAACATCT
AFFX-PheX-3_at	TTAATGGTCATGCTGCCGCAGGATG	Cfa.10014.1.A1_at	CAACCAACATCTTTGTGTCTCAGGA
AFFX-PheX-3_at	CATGCTGCCGCAGGATGATCAGTCC	AFFX-r2-Bs-phe-M_at	TCGGTTATTTAGGTCCAGCAGCTAC
AFFX-PheX-3_at	GGATGATCAGTCCGGGGCGCTGCAT	AFFX-r2-Bs-phe-M_at	CTACATTTACACATCTAGCAGTCAG
AFFX-PheX-3_at	CGGGGCGCTGCATAGAGTGCTGTCT	AFFX-r2-Bs-phe-M_at	TACATTTACACATCTAGCAGTCAGT
AFFX-PheX-3_at	CTGCATAGAGTGCTGTCTGCATTTT	AFFX-r2-Bs-phe-M_at	CCGAACATGTTGCTTACCGCACCAT
AFFX-PheX-3_at	GTGCTGTCTGCATTTTCTTGGAGAA	AFFX-r2-Bs-phe-M_at	GAACATGTTGCTTACCGCACCATTC
AFFX-PheX-3_at	TGATGATGTATTGATTCCAGGGGCC	AFFX-r2-Bs-phe-M_at	GGAGTGTATAGATGCAGCCGTTGCA
AFFX-PheX-3_at	GTATTGATTCCAGGGGCCATGCAGG	AFFX-r2-Bs-phe-M_at	GTTGCAGGCGAAGTTGATTTTGCTT
AFFX-PheX-3_at	AGGGGCCATGCAGGAGCTTGAAGCA	AFFX-r2-Bs-phe-M_at	AATCGTGGGTGAAATGACGTTGCCG
AFFX-PheX-3_at	AGTGAGGCTTCTGGGTGCATACCAG	AFFX-r2-Bs-phe-M_at	GCTCGACAAAATTTACTCACATTCA
AFFX-PheX-3_at	CTTCTGGGTGCATACCAGTCTTACC	AFFX-r2-Bs-phe-M_at	ATTTCTTCATCGACATTTTCCTTCC
AFFX-ThrX-3_at	AGAAGGACACCCGGACAATGCTGGC	AFFX-r2-Bs-phe-M_at	ATATGAATACGCCAATTCTACCGGG
AFFX-ThrX-3_at	CGCTTCTCTCGTCGGCGGACTTGTG	Cfa.10040.1.A1_at	GGCAGCTTCATAACCAGCGGTGTGC
AFFX-ThrX-3_at	CGGCGGACTTGTGATCGGCCTGCAT	Cfa.10040.1.A1_at	GACACACACAGGTTCTGAGCCTTGA
AFFX-ThrX-3_at	CGGCCTGCATGAGGATGACGAGACC	Cfa.10040.1.A1_at	TGAGCCTTGACTCTTCTTTAAACAA
AFFX-ThrX-3_at	CCAAATGATCCGCGTCCCGAATGCT	Cfa.10040.1.A1_at	AGGAAGGCAGCATCACCAAGGCATG
AFFX-ThrX-3_at	CCCGAATGCTGACATTGACGTAGTC	Cfa.10040.1.A1_at	ATGGAAGCCACTCCAAGGTGAGCTT
AFFX-ThrX-3_at	TGTCATTCCTTTTTATGAAGTGCTG	Cfa.10040.1.A1_at	CATCAGGTGAGTTTCCAGGGCAGAC
AFFX-ThrX-3_at	TGAAGTGCTGACAAGAGACGCGAGA	Cfa.10040.1.A1_at	AGACTGGACTGACCTGCTCATGAAG
AFFX-ThrX-3_at	AGACGCGAGAGACGTGCTTCCGAAG	Cfa.10040.1.A1_at	GAATGCTGTTCGGTGCCACAGGTCA
AFFX-ThrX-3_at	GAAGGAGTTTCCATATGCCGATGCC	Cfa.10040.1.A1_at	AGTTGTTTTCAATGGACCCTGCCCT
AFFX-ThrX-3_at	TGCCGATGCCGTAAAAGCAAGTGCT	Cfa.10040.1.A1_at	TTGGCTGTTGCAGGCCTCTGTGACA
AFFX-ThrX-3_at	TGCTGTCAGCAATATCCTCATTGCT	Cfa.10040.1.A1_at	CTCCCGGGTCACTCATGATAGTTAG
AFFX-ThrX-3_at	CCTCATTGCTGCGATCATGTCCAAG	AFFX-r2-TagIN-3_at	TAGGTGGCTCTAATCTGCGTTGGTT
AFFX-ThrX-3_at	CATGTCCAAGGATTGGCCGCTTGTC	AFFX-r2-TagIN-3_at	GTCGCTCACAGTGTCTGGTGTTCGA
AFFX-ThrX-3_at	GTTCCATCAGCCGTACCGGGCGATG	AFFX-r2-TagIN-3_at	ATTCTCGGTGGTGCTCAGTACATCC
AFFX-ThrX-3_at	GTACCGGGCGATGCTTGTGCCTGAG	AFFX-r2-TagIN-3_at	ACATCCAGTGGTGAGTCGCTACATC
AFFX-ThrX-3_at	AGTAGAGCACGTCGCCGAGATGAAG	AFFX-r2-TagIN-3_at	AAACCTCTGGGCATCCGTATTAAGC
AFFX-ThrX-3_at	ATATGGAACGGCTCTCAGCGGAGCA	AFFX-r2-TagIN-3_at	GACATTCCTACGACTTATCAGCACG
AFFX-ThrX-3_at	CGGAGCAGGCCCAACGATTCTCGTC	AFFX-r2-TagIN-3_at	AGAGATGCTTAGTACGCCTTCGAAT
AFFX-ThrX-3_at	GCTCGCGCTTCATTTCCCTCATTGT	AFFX-r2-TagIN-3_at	GTAATGACGCTGCATCGCTCAGTAT
AF059721.CDS1.S1_at	ACGGTCTCTGCCAAATGTCTGTGAT	AFFX-r2-TagIN-3_at	GACAGCAGCTCAGCATCTATGCATC
AF059721.CDS1.S1_at	ATGACGACGTCGCTCAACAGTCTGG	AFFX-r2-TagIN-3_at	GCATCATGTGCCTCACTAGGACATC
AF059721.CDS1.S1_at	GCCGTACTAGCGTCTCTGCAGAAGA	AFFX-r2-TagIN-3_at	CTAGGACATCATGCTCGACTCTGAG
AF059721.CDS1.S1_at	AGTCTAACCCTTCCTAATTGTCTTG	AFFX-Cf_G-6-PDH_M_at	AACTGAGCTGATCTTCTACACCTTG
AF059721.CDS1.S1_at	AATTGTCTTGTTTCTCCATCTGTGC	AFFX-Cf_G-6-PDH_M_at	GAGCTGATCTTCTACACCTTGTCCT
AF059721.CDS1.S1_at	GCAGTTAAGTTTTCCCCGATGGTTG	AFFX-Cf_G-6-PDH_M_at	TCTACACCTTGTCCTTCTGCAAGAG
AF059721.CDS1.S1_at	GTGATGCTCGCAAACGCTGATCCAG	AFFX-Cf_G-6-PDH_M_at	AGAGTGCAGCAGTGCCCCTGGCATC
AF059721.CDS1.S1_at	ATTTTGGACATCACACTTCGCTTTT	AFFX-Cf_G-6-PDH_M_at	TTGCCCGGGTCTTCGACCAGCCAGA
AF059721.CDS1.S1_at	TGAGTCATATCACCACGTGGGCCAT	AFFX-Cf_G-6-PDH_M_at	AGCCAGACAAGAAGTCTTTGTAATC
AF059721.CDS1.S1_at	GAAGTCAGCTTTTGCGTGCGCTACA	AFFX-Cf_G-6-PDH_M_at	TCTTTGTAAGGCATGTGGAGTCTTC
AF059721.CDS1.S1_at	AGCCGGCTGAATGCGAGTCTCGTTT	AFFX-Cf_G-6-PDH_M_at	CTGTGCCAATCATCGAGGTGGCTGG
AF243438.CDS32.S1_s_at	GTCTATATGCGAGTTTATTCCCACG	AFFX-Cf_G-6-PDH_M_at	GGGTCTTGTGCCAGCCCATTTTGAG
AF243438.CDS32.S1_s_at	CACGCCAGTTTCTGCTGATTTGGAG	AFFX-Cf_G-6-PDH_M_at	TAGAGTCAGCTCAGGTAACCCCTTC
AF243438.CDS32.S1_s_at	GCATATCCATTTCGTGCAACCAATA	AFFX-Cf_G-6-PDH_M_at	TCCTTTGCAATTCTAATTGTATTGG
AF243438.CDS32.S1_s_at	GTGGGCATCACAAAGACTCTCCTAT	AFFX-Cf_G-6-PDH_M_at	TCCAGCATGTACAGGGAAAGCTGCA
AF243438.CDS32.S1_s_at	GGTTTACAATCTGAGCGGAGCATCT	AFFX-Cf_G-6-PDH_M_at	TACAGGGAAAGCTGCAAGGGCAAGC
AF243438.CDS32.S1_s_at	GGAGCATCTCCACTTTTTAGTCCTA	AFFX-Cf_G-6-PDH_M_at	AGCTGCAAGGGCAAGCTTAGCAAGT
AF243438.CDS32.S1_s_at	CATATAAATTTTTCACCCCGGCAGA	AFFX-Cf_G-6-PDH_M_at	CCATTCCGCCTCAGCTGCATTGTGG
AF243438.CDS32.S1_s_at	GTGAAGCTGGTTCTGCTCTGGCATC	AFFX-Cf_G-6-PDH_M_at	TGTGGTGTCTCTCATCCTCCTGCAC
AF243438.CDS32.S1_s_at	GATAAAGCTTTACTGCGCGCATATT	AFFX-r2-Bs-lys-M_at	GAACGCATCCACTTTCATGGAAACA
AF243438.CDS32.S1_s_at	GCATATTCTACAGGCACTACCGATA	AFFX-r2-Bs-lys-M_at	GCTTCTTGAAGACCTATGTAAAGAA
AF243438.CDS32.S1_s_at	ACTTAATTCGAGATGCGTCGCCTAT	AFFX-r2-Bs-lys-M_at	CTTCGGATCACGCCCGGAGTAGAAG
AFFX-r2-Bs-phe-3_at	GACCATCCCGAGCTGAATATCGGGG	AFFX-r2-Bs-lys-M_at	TACGCATGACTACATTACAACGGGC
AFFX-r2-Bs-phe-3_at	ATCGGGGTCATTGCCAATGATATGG	AFFX-r2-Bs-lys-M_at	TGACTACATTACAACGGGCCAGGAA
AFFX-r2-Bs-phe-3_at	CTGTCTCCCGATGAAAACATATCTT	AFFX-r2-Bs-lys-M_at	GACTACATTACAACGGGCCAGGAAG
AFFX-r2-Bs-phe-3_at	GAGCTCTAGGCCCAAAACGACCTTA	AFFX-r2-Bs-lys-M_at	AGTTTGGTTTCGATCTTCATAACGG
AFFX-r2-Bs-phe-3_at	ATGGTCATGCTGCCGCAGGATGATC	AFFX-r2-Bs-lys-M_at	TTTCGATCTTCATAACGGACAAACT
AFFX-r2-Bs-phe-3_at	TCCGGGGCGCTGCATAGAGTGCTGT	AFFX-r2-Bs-lys-M_at	ACTGAACGGGCCATTGAACAAGTAT
AFFX-r2-Bs-phe-3_at	GTCTGCATTTTCTTGGAGAAATTTA	AFFX-r2-Bs-lys-M_at	CTGAACGGGCCATTGAACAAGTATT
AFFX-r2-Bs-phe-3_at	CCTGTCAAAAATTGAGTCACGTCCG	AFFX-r2-Bs-lys-M_at	TCCATTGCCATATCGGCTCGCAAAT
AFFX-r2-Bs-phe-3_at	CTGTCAAAAATTGAGTCACGTCCGA	AFFX-Cf_AdrenRecpt_M_at	TGGCCAACGTGATGCGCGCTCTCGG
AFFX-r2-Bs-phe-3_at	TCAAAAATTGAGTCACGTCCGACTA	AFFX-Cf_AdrenRecpt_M_at	CTCCTGGCCCTTAACTGGCTGGGCT
AFFX-r2-Bs-phe-3_at	GAGTCACGTCCGACTAAAACCGGAT	AFFX-Cf_AdrenRecpt_M_at	CTGGCCCTTAACTGGCTGGGCTACG
AFFX-r2-P1-cre-5_at	GATCGCCAGGCGTTTTCTGAGCATA	AFFX-Cf_AdrenRecpt_M_at	GAGTCCAGCCGGTGCCAAGCGCTCG
AFFX-r2-P1-cre-5_at	TCTGTCCGTTTGCCGGTCGTGGGCG	AFFX-Cf_AdrenRecpt_M_at	GGGTCAGAAGGCATTCGGAGTCTCT
AFFX-r2-P1-cre-5_at	CGGAAATGGTTTCCCGCAGAACCTG	AFFX-Cf_AdrenRecpt_M_at	CATTTCTCAGAGTTTGGGGTTCGGT
AFFX-r2-P1-cre-5_at	GATGTTCGCGATTATCTTCTATATC	AFFX-Cf_AdrenRecpt_M_at	TTGGAGACGTCTCTGCGGCGAAAGA
AFFX-r2-P1-cre-5_at	TTGGGCCAGCTAAACATGCTTCATC	AFFX-Cf_AdrenRecpt_M_at	TGGAGACGTCTCTGCGGCGAAAGAA
AFFX-r2-P1-cre-5_at	GCTGTTTCACTGGTTATGCGGCGGA	AFFX-Cf_AdrenRecpt_M_at	GAACCAACATGGAAGCCCGGACCCT
AFFX-r2-P1-cre-5_at	GCCGGTGAACGTGCAAAACAGGCTC	AFFX-Cf_AdrenRecpt_M_at	CCCCAGGACGGAAGCAAAGAGGGCA
AFFX-r2-P1-cre-5_at	GCAAAACAGGCTCTAGCGTTCGAAC	AFFX-Cf_AdrenRecpt_M_at	AAGAGGGCAGCAGATTGTTGTTCAC
AFFX-r2-P1-cre-5_at	GCACTGATTTCGACCAGGTTCGTTC	AFFX-Cf_AdrenRecpt_M_at	AGCAGATTGTTGTTCACCCCAGGAC
AFFX-r2-P1-cre-5_at	ATCGCTGCCAGGATATACGTAATCT	AFFX-Cf_AdrenRecpt_M_at	GTTCACCCCAGGACCTAGTGCGGTC
AFFX-r2-P1-cre-5_at	GGGATTGCTTATAACACCCTGTTAC	AFFX-Cf_AdrenRecpt_M_at	GAATGCGGCTGTATCCTGAGCCGGC
AFFX-r2-TagQ-5_at	GAGCGTATTTGCTGTCAGAACCTCA	AFFX-Cf_AdrenRecpt_M_at	GGCTGTATCCTGAGCCGGCTCGGTC
AFFX-r2-TagQ-5_at	TCAGAACCTCAGCTCATCATGTATG	AFFX-Cf_AdrenRecpt_M_at	AGCCGGCTCGGTCAGCTCCGCATTT
AFFX-r2-TagQ-5_at	GTATGATGCTGTACCATCCTGCGAT	Cfa.10056.1.A1_at	ATTTTGGCCCAAGCCTTAGCTTAAT
AFFX-r2-TagQ-5_at	GCACCGCTATAATGCGAGGCTCTCC	Cfa.10056.1.A1_at	AAAAAATCTGGTACGTGGCTAATAT
AFFX-r2-TagQ-5_at	AGCGAGTCGAATCCAATGCCGTAGC	Cfa.10056.1.A1_at	GGTTTATAAGGATCCTCTTTGTATA
AFFX-r2-TagQ-5_at	GATAACGATGCCGCTGACTCTACGG	Cfa.10056.1.A1_at	GGGAAATCTATTTGTACCTGAGGTA
AFFX-r2-TagQ-5_at	GACTCTACGGTAATGCACGATCCTC	Cfa.10056.1.A1_at	TTCCCAAAATGCTTTCTTGGCTCTT
AFFX-r2-TagQ-5_at	GCACGATCCTCTACATTGATAGCAG	Cfa.10056.1.A1_at	TTCTTGGCTCTTTAAGCTTTCAGTT
AFFX-r2-TagQ-5_at	GGTGCAAGGCTCCTAGCATGTAGTC	Cfa.10056.1.A1_at	GAAATTTTTGCATCAGAGGTTTACA
AFFX-r2-TagQ-5_at	AGGTCTGCGACTGATCCTAGTGCAA	Cfa.10056.1.A1_at	GTTTAAATCCTCTCACAATCAGTAT
AFFX-r2-TagQ-5_at	TGCGTCTGAGCCTGAGCTACAGCGA	Cfa.10056.1.A1_at	ACAATCAGTATCTCCTGCTTGAGAA
AF243438.CDS35.S1_s_at	AGCTACAGCGCTTTTAGTTTTGCCC	Cfa.10056.1.A1_at	GATCGACAGCTAATACGCATTCATT
AF243438.CDS35.S1_s_at	TAGTTTTGCCCATTTCTGGACTAGG	Cfa.10056.1.A1_at	CATCTCCTCTGCTCTGAGGGTAAAG
AF243438.CDS35.S1_s_at	AACATTGTTCCCATGGTACTACCTA	AFFX-Cf_P450-2E1_M_s_at	AAATCGACAGGGTGATCGGCCCAAG
AF243438.CDS35.S1_s_at	TACTACCTAGACCACTCGGAAGCGA	AFFX-Cf_P450-2E1_M_s_at	TTCAGCGATTCATCGACCTGCTGCC
AF243438.CDS35.S1_s_at	AAGCGATTGTCCCTACTGTGGTTGT	AFFX-Cf_P450-2E1_M_s_at	CTGCCCCATGTAGCAAACCAGGACA
AF243438.CDS35.S1_s_at	GTGGTTGTGTCCTTTTGAGATACTC	AFFX-Cf_P450-2E1_M_s_at	AACGAGAACTTCCACCTGCTCAGCA
AF243438.CDS35.S1_s_at	GGAGGGAATTCATCCATTCGGTATT	AFFX-Cf_P450-2E1_M_s_at	GCACCGGCTGGCTCCAGCTTTATAA
AF243438.CDS35.S1_s_at	TTTAACCCTACTATCGCCCAAATAT	AFFX-Cf_P450-2E1_M_s_at	GCTGGCTCCAGCTTTATAACATTTT
AF243438.CDS35.S1_s_at	AATCGTACGGATCTTAGCTTTTGAA	AFFX-Cf_P450-2E1_M_s_at	AAGCTATCTGCACTACCTGCCCGGA
AF243438.CDS35.S1_s_at	ACTATTATCTCTGCAACTTACGTCG	AFFX-Cf_P450-2E1_M_s_at	GCCCGGAAGCCATAGAAAAGTCTTA
AF243438.CDS35.S1_s_at	AAATTGAGCCTGTACGACGATCTTT	AFFX-Cf_P450-2E1_M_s_at	AAGGAGCACCAGGAGTCGCTGGACC
AFFX-r2-TagIN-5_at	GGTCAATGTCAGTACGGATCGCGTC	AFFX-Cf_P450-2E1_M_s_at	GAGCACCAGGAGTCGCTGGACCCCA
AFFX-r2-TagIN-5_at	GTCGATCTAGGTGACTACGCACGCC	AFFX-Cf_P450-2E1_M_s_at	TGCTCCCGGGACTTCACTGACTGCT
AFFX-r2-TagIN-5_at	GTGCTCCGTGCGAAATACGCGGTCA	AFFX-Cf_P450-2E1_M_s_at	CCAGGAGCTGCAGAAGGAGAGATAC
AFFX-r2-TagIN-5_at	TATAATGGCGTCTGTCGTGCTCATA	AFFX-Cf_P450-2E1_M_s_at	GATACGGTACGGAGCCTTGGTATAC
AFFX-r2-TagIN-5_at	TGCTAGACGTGTCCATCGAGCTGCA	AFFX-Cf_P450-2E1_M_s_at	TGACCTGTTCTTTGCGGGCACGGAG
AFFX-r2-TagIN-5_at	GCTGCATAGCTATACTTCGAGTCAC	AFFX-Cf_P450-2E1_M_s_at	ACCACCCTGAGATACGGGCTCCTGA
AFFX-r2-TagIN-5_at	TGAATAGTGTCGTAGGCTCTCGGGC	AFFX-Cf_P450-2E1_M_s_at	TACCCAGAGGTCGAAGAGAAACTTC
AFFX-r2-TagIN-5_at	GCACGTTGTTAAACTGTTGCCGCCA	AFFX-r2-TagB_at	TTAACTCGACTGCCGCGTGAACAAC
AFFX-r2-TagIN-5_at	GTCAGTTGCCACTCGTTGATAGTCA	AFFX-r2-TagB_at	GAGACCGGGCTAAGGCACGTATCAT
AFFX-r2-TagIN-5_at	AGACTCGTCCCTCGATATCAATACT	AFFX-r2-TagB_at	CACGTATCATATCCCTAATTCGCTG
AFFX-r2-TagIN-5_at	TATCAATACTCGTCCGCAGGTGAAC	AFFX-r2-TagB_at	TACAGGCGCGACGAACCTTATACTC
AFFX-r2-Bs-lys-3_at	ATACGGCCGGTTTTGTGTTAGCAGC	AFFX-r2-TagB_at	ACTAGCATCTAAGCACTCGGCTCTA
AFFX-r2-Bs-lys-3_at	GGCCGGTTTTGTGTTAGCAGCGGAA	AFFX-r2-TagB_at	GATCGAAGGTCGGAACTCCAGTGCC
AFFX-r2-Bs-lys-3_at	GTTTTGTGTTAGCAGCGGAAAAAAT	AFFX-r2-TagB_at	GATGGCTCACGTCTTATTTGGGCCG
AFFX-r2-Bs-lys-3_at	TATTCATTTGTATCCAAGGTGCTGA	AFFX-r2-TagB_at	GGGCCGCCAGAGTTATGTTTGAGTC
AFFX-r2-Bs-lys-3_at	TTCATTTGTATCCAAGGTGCTGAAT	AFFX-r2-TagB_at	TGAGTCTTCGATGTATGCGCTCGTT
AFFX-r2-Bs-lys-3_at	TTGTATCCAAGGTGCTGAATCTTGG	AFFX-r2-TagB_at	GTGCTATATCCTTACCGCGTATGGA
AFFX-r2-Bs-lys-3_at	GTGCTGAATCTTGGAGGAGGTTTCG	AFFX-r2-TagB_at	CATTTGTCTACCTTACCGTCAAGAA
AFFX-r2-Bs-lys-3_at	TCATGCCACTGAATACGTTGAAAAA	AFFX-PheX-3_at	AAGTTTGTCAGTGACCATCCCGAGC
AFFX-r2-Bs-lys-3_at	ATGCCACTGAATACGTTGAAAAAAT	AFFX-PheX-3_at	GTCAGTGACCATCCCGAGCTGAATA
AFFX-r2-Bs-lys-3_at	GAACCGGGCCGTTCTCTCGTGGGAG	AFFX-PheX-3_at	CCATCCCGAGCTGAATATCGGGGTC
AFFX-r2-Bs-lys-3_at	CGGGCCGTTCTCTCGTGGGAGACGC	AFFX-PheX-3_at	GAGCTGAATATCGGGGTCATTGCCA
AF243438.CDS61.S1_s_at	GGGTACACCTCTAGGGAGAACACTT	AFFX-PheX-3_at	TATCGGGGTCATTGCCAATGATATG
AF243438.CDS61.S1_s_at	TGTAGAAGCGTATCTTGCCACAAGA	AFFX-PheX-3_at	GCCAATGATATGGCAGCTTCTACAT
AF243438.CDS61.S1_s_at	GCCACAAGATCTGCATTTACGGAGT	AFFX-PheX-3_at	ATGGCAGCTTCTACATACGAATTAA
AF243438.CDS61.S1_s_at	GGAGAAAAATTAACCGCTGCCGTGA	AFFX-PheX-3_at	CTGTCTCCCGATGAAAACATATCTT
AF243438.CDS61.S1_s_at	TGTTGTCTTACAGCGTTTGCTCGGC	AFFX-PheX-3_at	GAATTCAAAATTGAGCTCTAGGCCC
AF243438.CDS61.S1_s_at	TTTGCTCGGCCATTTAAATATCATT	AFFX-PheX-3_at	TTAATGGTCATGCTGCCGCAGGATG
AF243438.CDS61.S1_s_at	ATCATTATCGCGCAGATGGTTATTG	AFFX-PheX-3_at	CATGCTGCCGCAGGATGATCAGTCC
AF243438.CDS61.S1_s_at	TATAGACCAGTGACCATTGATGAAT	AFFX-PheX-3_at	GGATGATCAGTCCGGGGCGCTGCAT
AF243438.CDS61.S1_s_at	GAATTTGCACGAGGCGATCCACCTA	AFFX-PheX-3_at	CGGGGCGCTGCATAGAGTGCTGTCT
AF243438.CDS61.S1_s_at	GATCCACCTACTGGCATGGCATCAG	AFFX-PheX-3_at	CTGCATAGAGTGCTGTCTGCATTTT
AF243438.CDS61.S1_s_at	CCCCGCCGATTAATTATGACATTCT	AFFX-PheX-3_at	GTGCTGTCTGCATTTTCTTGGAGAA
AF243438.CDS48.S1_s_at	TTTGATCCTCCGATAAATGCGACTA	AFFX-PheX-3_at	TGATGATGTATTGATTCCAGGGGCC
AF243438.CDS48.S1_s_at	AGCACCGCTGTGTACCGATAAAGTC	AFFX-PheX-3_at	GTATTGATTCCAGGGGCCATGCAGG
AF243438.CDS48.S1_s_at	ATACTACAGAGTCGACCGGCATTGT	AFFX-PheX-3_at	AGGGGCCATGCAGGAGCTTGAAGCA
AF243438.CDS48.S1_s_at	ATCCATCGGTGTAGATTGTCGCCCA	AFFX-PheX-3_at	AGTGAGGCTTCTGGGTGCATACCAG
AF243438.CDS48.S1_s_at	AGGCTTGTCTGATTGTGAACTGCTT	AFFX-PheX-3_at	CTTCTGGGTGCATACCAGTCTTACC
AF243438.CDS48.S1_s_at	AATTGGCCTTCAGATTTGTCGGACC	AFFX-ThrX-3_at	AGAAGGACACCCGGACAATGCTGGC
AF243438.CDS48.S1_s_at	GGACCTAGTGATCCTGGCCGAACAA	AFFX-ThrX-3_at	CGCTTCTCTCGTCGGCGGACTTGTG
AF243438.CDS48.S1_s_at	GGCCGAACAACTAAGCTCCTTGATT	AFFX-ThrX-3_at	CGGCGGACTTGTGATCGGCCTGCAT
AF243438.CDS48.S1_s_at	GGATGCATCCCAATACCGATAATCG	AFFX-ThrX-3_at	CGGCCTGCATGAGGATGACGAGACC
AF243438.CDS48.S1_s_at	GTGACGACGATACGTATACCGCGCT	AFFX-ThrX-3_at	CCAAATGATCCGCGTCCCGAATGCT
AF243438.CDS48.S1_s_at	ATACCGCGCTACATAGTCATGCTGT	AFFX-ThrX-3_at	CCCGAATGCTGACATTGACGTAGTC
AF243438.CDS74.S1_s_at	TAGAATGCCAGGAGCTAACCGGAGA	AFFX-ThrX-3_at	TGTCATTCCTTTTTATGAAGTGCTG
AF243438.CDS74.S1_s_at	TGTCACAGTGGGAGGAGCTACCGCC	AFFX-ThrX-3_at	TGAAGTGCTGACAAGAGACGCGAGA
AF243438.CDS74.S1_s_at	ACATATGCGGACTTGCTTGTCGAAG	AFFX-ThrX-3_at	AGACGCGAGAGACGTGCTTCCGAAG
AF243438.CDS74.S1_s_at	AGCAAGCTGTTGTACATTCCGTTCG	AFFX-ThrX-3_at	GAAGGAGTTTCCATATGCCGATGCC
AF243438.CDS74.S1_s_at	GTTCGCGCATTAATGCTGGCCGAAA	AFFX-ThrX-3_at	TGCCGATGCCGTAAAAGCAAGTGCT
AF243438.CDS74.S1_s_at	TTCTTGTACAACGACCCCGTACTAT	AFFX-ThrX-3_at	TGCTGTCAGCAATATCCTCATTGCT
AF243438.CDS74.S1_s_at	CCGTACTATTCTATCCGTGGAGTCA	AFFX-ThrX-3_at	CCTCATTGCTGCGATCATGTCCAAG
AF243438.CDS74.S1_s_at	CAATGCGTTCTTATATGCTGGTTAC	AFFX-ThrX-3_at	CATGTCCAAGGATTGGCCGCTTGTC
AF243438.CDS74.S1_s_at	GGATCGTGCATGTCATTTTTCGCTG	AFFX-ThrX-3_at	GTTCCATCAGCCGTACCGGGCGATG
AF243438.CDS74.S1_s_at	TTTTTCGCTGGTATGTTAGTCGGTA	AFFX-ThrX-3_at	GTACCGGGCGATGCTTGTGCCTGAG
AF243438.CDS74.S1_s_at	AATGGCTTTCTGTGCAGGCATTGTC	AFFX-ThrX-3_at	AGTAGAGCACGTCGCCGAGATGAAG
AFFX-r2-Ec-bioD-3_at	TTCTGACACTTTCACTTTTGCAGAT	AFFX-ThrX-3_at	ATATGGAACGGCTCTCAGCGGAGCA
AFFX-r2-Ec-bioD-3_at	TGACACTTTCACTTTTGCAGATTGG	AFFX-ThrX-3_at	CGGAGCAGGCCCAACGATTCTCGTC
AFFX-r2-Ec-bioD-3_at	ACTTTTGCAGATTGGGTAACACAGG	AFFX-ThrX-3_at	GCTCGCGCTTCATTTCCCTCATTGT
AFFX-r2-Ec-bioD-3_at	AACAACTGCCGGTGATACTGGTAGT	Cfa.10024.1.A1_at	TAAGGTCCCACATTTATGGCAGGAG
AFFX-r2-Ec-bioD-3_at	GCCGGTGATACTGGTAGTTGGTGTG	Cfa.10024.1.A1_at	TGGCAGGAGAGATGTTTCCATTTTA
AFFX-r2-Ec-bioD-3_at	AACTCGGCTGTATTAATCACGCGAT	Cfa.10024.1.A1_at	ACGTTCCCTTTGTAAAATCAGCTGA
AFFX-r2-Ec-bioD-3_at	CACAGGTAATACAACACGCCGGACT	Cfa.10024.1.A1_at	GAGAGTTTCTGTTCGTCTTTGCTCA
AFFX-r2-Ec-bioD-3_at	ACAACACGCCGGACTGACTCTGGCG	Cfa.10024.1.A1_at	GTCTTTGCTCATTGAGAGTCTTCCT
AFFX-r2-Ec-bioD-3_at	GTCACGCTGAATATATGACCACGCT	Cfa.10024.1.A1_at	AGTCTTCCTCCCTGTGTGTTGGAGA
AFFX-r2-Ec-bioD-3_at	TCACGCTGAATATATGACCACGCTC	Cfa.10024.1.A1_at	TCTGTTGCCCCGAATCCTTTATCAA
AFFX-r2-Ec-bioD-3_at	TGCTGGGAGAGATCCCCTGGCTTGC	Cfa.10024.1.A1_at	GAATCCTTTATCAACCTTCATGTTT
AFFX-r2-TagO-3_at	TGACCTTATCGACGCGCATGTGAGC	Cfa.10024.1.A1_at	GATGTTGTGCTCATTCATAGACCGA
AFFX-r2-TagO-3_at	CGATGTGAGCACTCTCATCTGCGGA	Cfa.10024.1.A1_at	CCATATTTTCCCAGTAGTAGAATTA
AFFX-r2-TagO-3_at	ATATACCGCTGCTGCACTGATATGA	Cfa.10024.1.A1_at	ATTATTGAGTCTGTGTAAGGTCCCA
AFFX-r2-TagO-3_at	GAGTGCTACGCCTAAACTGGCTGTC	Cfa.10050.1.A1_at	GGGCTTCCATGCCTGCGTGATGCAT
AFFX-r2-TagO-3_at	ACTGGCTGTCTAGCACTGTAGCTGG	Cfa.10050.1.A1_at	CTGCGTGATGCATCTGCAGGCATTT
AFFX-r2-TagO-3_at	GTAGCTGGTGCATGTACTCGACTGC	Cfa.10050.1.A1_at	ATGGGCCCGAACTGGCTTGTCAGAC
AFFX-r2-TagO-3_at	ATCAGCTTGCGCCTATTATATGCCT	Cfa.10050.1.A1_at	TGTCAGACCAATCAAGGCATTCATG
AFFX-r2-TagO-3_at	GATCACGGTGCCACAACATGCTACA	Cfa.10050.1.A1_at	TATGCAGTCCTCTGGGCACTGAGAT
AFFX-r2-TagO-3_at	TCTATCCCGTGGACTCAACGTGCAT	Cfa.10050.1.A1_at	GAAGGTGTTCAGTTAAGTGTGTATC
AFFX-r2-TagO-3_at	CTATGCTGAGCGCGTATCTGTGTAC	Cfa.10050.1.A1_at	GTATCTAAATTGTTTACCTGATGCC
AFFX-r2-TagO-3_at	TAGCCCGACACTGTGCTCGATAAGA	Cfa.10050.1.A1_at	TGATGCCACATTTCCTGTTTTCTAA
AFFX-r2-Bs-dap-M_at	TGAAGATTGATCAGCTTGTGTATGG	Cfa.10050.1.A1_at	TAGATTTTCAGACCTAGGCTTTTAA
AFFX-r2-Bs-dap-M_at	GAAAATTGCTTTGATCGCGCATGAC	Cfa.10050.1.A1_at	GTGATATTCTTTCCTTTTATGTGTA
AFFX-r2-Bs-dap-M_at	AAAGAATCATGATCTATACGCAACC	Cfa.10050.1.A1_at	CAGTGAGGTTTGGTTTGCAGCATTT
AFFX-r2-Bs-dap-M_at	GTCATTTTTTTGCGCGACCCGCTGA	AFFX-Cfa-r2-P1-cre-5_s_at	GATCGCCAGGCGTTTTCTGAGCATA
AFFX-r2-Bs-dap-M_at	TGAACCGGATGTCTCGGCATTAATC	AFFX-Cfa-r2-P1-cre-5_s_at	ACCTGGAAAATGCTTCTGTCCGTTT
AFFX-r2-Bs-dap-M_at	CCGTTTATGTGATGTGTATTCCATT	AFFX-Cfa-r2-P1-cre-5_s_at	AAAATGCTTCTGTCCGTTTGCCGGT
AFFX-r2-Bs-dap-M_at	CTGCGGAAATTCTTGTGCGCACACT	AFFX-Cfa-r2-P1-cre-5_s_at	AATGGTTTCCCGCAGAACCTGAAGA
AFFX-r2-Bs-dap-M_at	GCGGAAATTCTTGTGCGCACACTTG	AFFX-Cfa-r2-P1-cre-5_s_at	AACCTGAAGATGTTCGCGATTATCT
AFFX-r2-Bs-dap-M_at	ATGAAGGTGTTTTCGAATTCCGTGA	AFFX-Cfa-r2-P1-cre-5_s_at	TTATCTTCTATATCTTCAGGCGCGC
AFFX-r2-Bs-dap-M_at	CCGAATGTATAATGCTGACGTTCTT	AFFX-Cfa-r2-P1-cre-5_s_at	TCAGGCGCGCGGTCTGGCAGTAAAA
AFFX-r2-Bs-dap-M_at	CCCACAGTGATGATGTCGAGATCGG	AFFX-Cfa-r2-P1-cre-5_s_at	TCCAGCAACATTTGGGCCAGCTAAA
AFFX-Gga-gapdh-5_a_at	GATTTGGCCGTATTGGCCGCCTGGT	AFFX-Cfa-r2-P1-cre-5_s_at	TAAACATGCTTCATCGTCGGTCCGG
AFFX-Gga-gapdh-5_a_at	AGTGGTGGCCATCAATGATCCCTTC	AFFX-Cfa-r2-P1-cre-5_s_at	CACGACCAAGTGACAGCAATGCTGT
AFFX-Gga-gapdh-5_a_at	GGCCATCAATGATCCCTTCATCGAT	AFFX-Cfa-r2-P1-cre-5_s_at	AAACAGGCTCTAGCGTTCGAACGCA
AFFX-Gga-gapdh-5_a_at	ATCCCTTCATCGATCTGAACTACAT	AFFX-Cfa-r2-Bs-dap-5_at	GGGCCATAGACCATACATACGATCA
AFFX-Gga-gapdh-5_a_at	AAATATGATTCTACACACGGACACT	AFFX-Cfa-r2-Bs-dap-5_at	ATCTGATGTGATGCCTGTTGAGTCA
AFFX-Gga-gapdh-5_a_at	ATTCTACACACGGACACTTCAAGGG	AFFX-Cfa-r2-Bs-dap-5_at	GAGTCAGATGCTTTCATTTACACAG
AFFX-Gga-gapdh-5_a_at	CACACGGACACTTCAAGGGCACTGT	AFFX-Cfa-r2-Bs-dap-5_at	AGATATCCATGCCTGTTTTACAGAA
AFFX-Gga-gapdh-5_a_at	ACTTCAAGGGCACTGTCAAGGCTGA	AFFX-Cfa-r2-Bs-dap-5_at	AACACAACCGGATGTCTTGATTGAT
AFFX-Gga-gapdh-5_a_at	AAGGGCACTGTCAAGGCTGAGAACG	AFFX-Cfa-r2-Bs-dap-5_at	TTGCATTAGAGCACGGAGTCCGTCC
AFFX-Gga-gapdh-5_a_at	GGCTGAGAACGGGAAACTTGTGATC	AFFX-Cfa-r2-Bs-dap-5_at	GAGTCCGTCCAGTTGTCGGAACAAC
AFFX-Gga-gapdh-5_a_at	AACTTGTGATCAATGGGCACGCCAT	AFFX-Cfa-r2-Bs-dap-5_at	GGAACAACCGGTTTCTCAGAAGCTG
AFFX-r2-TagC_at	TCTGAACCTGTCCATAGTATCCTGT	AFFX-Cfa-r2-Bs-dap-5_at	AAAGGGATCGGAGCCATCATCGCGC
AFFX-r2-TagC_at	AAGCGTCCAATGTACCTATATCGTG	AFFX-Cfa-r2-Bs-dap-5_at	CAAATTTTGCGCTCGGTGCGATACT
AFFX-r2-TagC_at	GGCTGTGCCTAACGAATCTGGGACG	AFFX-Cfa-r2-Bs-dap-5_at	GATTATTGAGCTTCATCATGACCAG
AFFX-r2-TagC_at	ACGTGCCTAAGTAATCTGGTCCGCG	Cfa.10066.1.A1_at	TAATTGTAATCACTCCTTTCCTTTC
AFFX-r2-TagC_at	GTACGGTGATCGTGGACGCTTGACC	Cfa.10066.1.A1_at	TCCTTTCCTTTCATTAGCTTGGGAT
AFFX-r2-TagC_at	TTATTGGATGGCGTTCCGTCCTATT	Cfa.10066.1.A1_at	GATATTCCAGGATTTATAAACTTCA
AFFX-r2-TagC_at	GCTAAGCCATTACGCGACATTCTGC	Cfa.10066.1.A1_at	GAACCACTTGTATCATTTTTATAAT
AFFX-r2-TagC_at	CAAAGTTACGTCGCATTCTCTCACG	Cfa.10066.1.A1_at	TGGCAATGTACCTCAAAATCTCTTT
AFFX-r2-TagC_at	TACGGCTGATTCTCTAGGCTTACGC	Cfa.10066.1.A1_at	TAGCTTACCCCTGGGTTTGACTCAA
AFFX-r2-TagC_at	CTTACGCGCATGAGCTCTAGGTTCC	Cfa.10066.1.A1_at	ATTGTGCTAACCAACCTATTCTTTG
AFFX-r2-TagC_at	TGCGTAGTTCTGTCATAGCGTCGAG	Cfa.10066.1.A1_at	AACCTATTCTTTGATTTCCTGTGAA
AF243438.CDS16.S1_s_at	GTTGGAATTGCGCATCATCCAGTCC	Cfa.10066.1.A1_at	AGACAGTGCTTTAAAGACATTTTGC
AF243438.CDS16.S1_s_at	ACTCAATGCTTAGAGCGTTCCACGC	Cfa.10066.1.A1_at	GTTTGACTCAAAATCCCCAGGTGTC
AF243438.CDS16.S1_s_at	AAGGGCCCTCAGCACAAGGTTGCGA	Cfa.10066.1.A1_at	CTCAAAATCCCCAGGTGTCTGTGTA
AF243438.CDS16.S1_s_at	GATACTCTATTTATGGTTTCCTCTA	AFFX-r2-TagG_at	GTGACATGAGTCTAGCTTCGCGGTC
AF243438.CDS16.S1_s_at	GAGACTTGAGACATTCACTTGCCAA	AFFX-r2-TagG_at	GCCTGCGAATGAGTCGTCAGTGCCC
AF243438.CDS16.S1_s_at	ACTTGCCAAGTTTACCATCGCTTGT	AFFX-r2-TagG_at	GTGCGCCGAATGTGTCTGTAATGCC
AF243438.CDS16.S1_s_at	AAAACTTCTTCATTCTCTTCATCAT	AFFX-r2-TagG_at	GACATCTACGGGCGGCTATTGACGA
AF243438.CDS16.S1_s_at	AAAGGGCCCTAGAACTCAGCCGAGT	AFFX-r2-TagG_at	TTGACGAACTCTCCGGTATATGCTC
AF243438.CDS16.S1_s_at	GTTCATATTATGTCGTAGGGCGCAC	AFFX-r2-TagG_at	GCTGATACGCTAGGGTGCTTGCTAC
AF243438.CDS16.S1_s_at	TAGGGCGCACGCTAAACATATTCGA	AFFX-r2-TagG_at	ATATGGCGACTGTGTCCGTCTATAC
AF243438.CDS16.S1_s_at	GCATCCAGTAGTACCCGTGTTTGTA	AFFX-r2-TagG_at	GAGCGTCTCCTAAATAGATCCGGTC
AF243438.CDS42.S1_s_at	GTCACGATAGACATCGGTTCGCCCA	AFFX-r2-TagG_at	AGATCCGGTCTTATCGCTGAATGTC
AF243438.CDS42.S1_s_at	CCCAGCCGTCGAATACAGCATTATA	AFFX-r2-TagG_at	GATCCTCGCTAAGTATTCAGCCACC
AF243438.CDS42.S1_s_at	AAAATGTAGGGCTGCTTCCTCACTT	AFFX-r2-TagG_at	TCAGCCACCTCGTATAGTATTCGCG
AF243438.CDS42.S1_s_at	AAATGGCTCGATTCATGTTTCATAG	Cfa.10092.1.A1_at	AGTTTTTCATTGTCATTTTATCTGT
AF243438.CDS42.S1_s_at	GAGGGTTTTATGACTTTAGCACTAT	Cfa.10092.1.A1_at	GTCTGTTAGGACTATGGCTCAATAA
AF243438.CDS42.S1_s_at	AGATAATGTAACTGCGGCCCATCGC	Cfa.10092.1.A1_at	GAAAGCAGAATCAGACTACAGAGAA
AF243438.CDS42.S1_s_at	GGCCCATCGCATGGCTTGGAAATAT	Cfa.10092.1.A1_at	ATAAACTGTTGGTTGCCAGAGGAAA
AF243438.CDS42.S1_s_at	GCGAATTGCACATCTGTCGTGCCGA	Cfa.10092.1.A1_at	GGAGATAACAGGCTTCCAGTTATGA
AF243438.CDS42.S1_s_at	GTCGTGCCGACAGTTTGCAGATCAA	Cfa.10092.1.A1_at	CATATGGTGACAGCGTGGCTAGCCA
AF243438.CDS42.S1_s_at	TACAGATGTTTTTTCGTTGCTTTAT	Cfa.10092.1.A1_at	GTGGCTAGCCATACTTGTGGCGACA
AF243438.CDS42.S1_s_at	TAGAACAGATTACCAACAGCCACGC	Cfa.10092.1.A1_at	ACCCAGTGTTTACCTTAGGCATTAT
AFFX-Gga-r2-Bs-phe-3_at	GATATGGCAGCTTCTACATACGAAT	Cfa.10092.1.A1_at	CTTGTGGCGACAGAGCATAATGTAT
AFFX-Gga-r2-Bs-phe-3_at	AAGATTTATTATCCTGTCTCCCGAT	Cfa.10092.1.A1_at	TTGAATCACTACGTTGTACACCTGA
AFFX-Gga-r2-Bs-phe-3_at	GTCTCCCGATGAAAACATATCTTTT	Cfa.10092.1.A1_at	CTACGTTGTACACCTGAACTAATGT
AFFX-Gga-r2-Bs-phe-3_at	ATTCAAAATTGAGCTCTAGGCCCAA	AFFX-r2-Ec-bioB-5_at	CATTTCGATCCTCGTCAGGTGCAGG
AFFX-Gga-r2-Bs-phe-3_at	GCTCTAGGCCCAAAACGACCTTAAT	AFFX-r2-Ec-bioB-5_at	TTTCGATCCTCGTCAGGTGCAGGTC
AFFX-Gga-r2-Bs-phe-3_at	GACCTTAATGGTCATGCTGCCGCAG	AFFX-r2-Ec-bioB-5_at	TTCGATCCTCGTCAGGTGCAGGTCA
AFFX-Gga-r2-Bs-phe-3_at	ATGCTGCCGCAGGATGATCAGTCCG	AFFX-r2-Ec-bioB-5_at	TCGATCCTCGTCAGGTGCAGGTCAG
AFFX-Gga-r2-Bs-phe-3_at	GCATAGAGTGCTGTCTGCATTTTCT	AFFX-r2-Ec-bioB-5_at	TCGCGCTACAAAACCGGGCTGGAAG
AFFX-Gga-r2-Bs-phe-3_at	TTCTTGGAGAAATTTAAACCTGTCA	AFFX-r2-Ec-bioB-5_at	CGCGCTACAAAACCGGGCTGGAAGC
AFFX-Gga-r2-Bs-phe-3_at	TGTCAAAAATTGAGTCACGTCCGAC	AFFX-r2-Ec-bioB-5_at	AAGCCGAGCGGTTGATGGAAGTTGA
AFFX-Gga-r2-Bs-phe-3_at	GAGTCACGTCCGACTAAAACCGGAT	AFFX-r2-Ec-bioB-5_at	GAGCGGTTGATGGAAGTTGAACAGG
AFFX-Gga-r2-Bs-thr-5_s_at	ACACCGGCGCTAACTTTACATGAAG	AFFX-r2-Ec-bioB-5_at	CGGCAGGATCGACGCGCTTCTGTAT
AFFX-Gga-r2-Bs-thr-5_s_at	TATTCACCTGCCGAAGCTGTCTGAG	AFFX-r2-Ec-bioB-5_at	GCTGGATCTGCTGTTTGAAGCGCAG
AFFX-Gga-r2-Bs-thr-5_s_at	GAAGGCGTCAATCCTACGGGATCAT	AFFX-r2-Ec-bioB-5_at	CTGGATCTGCTGTTTGAAGCGCAGC
AFFX-Gga-r2-Bs-thr-5_s_at	GCATTGTCATCATCCCGAACGGAAA	AFFX-r2-TagJ-3_at	GAGTCTCTCTTAGCATAGTGTCCGC
AFFX-Gga-r2-Bs-thr-5_s_at	ACTCGCTCAAGCTGTCATGTACGGA	AFFX-r2-TagJ-3_at	TCGGCTGATATAGGTCGTGGCTCCC
AFFX-Gga-r2-Bs-thr-5_s_at	GACGGAAACTTTGACGATGCGCTTA	AFFX-r2-TagJ-3_at	CGTGGCTCCCTGTATATCGAGGTGA
AFFX-Gga-r2-Bs-thr-5_s_at	AAAATTGTCCGTTCCATCTGTGAGA	AFFX-r2-TagJ-3_at	GAGTCTATCTGGATCAACGTCGCAC
AFFX-Gga-r2-Bs-thr-5_s_at	TGAGAAATCACCGATTGCCCTTGTC	AFFX-r2-TagJ-3_at	ATAGGATGCGGCGATCTCATACAGC
AFFX-Gga-r2-Bs-thr-5_s_at	AAAACTGCTGCCTTCGAAGTGTGCG	AFFX-r2-TagJ-3_at	CGTTACGGTCGCTGCGTACTGTATA
AFFX-Gga-r2-Bs-thr-5_s_at	GATGTTTTAGCGATCCCGGTCGGAA	AFFX-r2-TagJ-3_at	GTCGGCAAGCACTTAGTCGTGTCGT
AFFX-Gga-r2-Bs-thr-5_s_at	ATCACTGCGTACTGGAAGGGCTTCA	AFFX-r2-TagJ-3_at	TGTCGTAAGCCAGTGTGTCGTGTCT
AFFX-LysX-M_at	GATGGCGCTTGAGCACCGCATCGGC	AFFX-r2-TagJ-3_at	TAATATCTGACCACGCCTTGTAATC
AFFX-LysX-M_at	CGCTTGAGCACCGCATCGGCTGCAT	AFFX-r2-TagJ-3_at	GACACGCGCTTGACACGACTGAATC
AFFX-LysX-M_at	GCACCGCATCGGCTGCATTGTGGTG	AFFX-r2-TagJ-3_at	GAATCCAGCTTAAGAGCCCTGCAAC
AFFX-LysX-M_at	GCATCGGCTGCATTGTGGTGGATAA	AFFX-Cfa-r2-Ec-bioC-3_at	GCTGGTGCAGGGATCGTTACCCGAA
AFFX-LysX-M_at	GGATAATTTCTATGAAATCGCGCTT	AFFX-Cfa-r2-Ec-bioC-3_at	GTTACCCGAACGTCATCAGGCGTGG
AFFX-LysX-M_at	ATTTCTATGAAATCGCGCTTCTTGA	AFFX-Cfa-r2-Ec-bioC-3_at	GAGCGTCCGCATGCTAATCGCTTTT
AFFX-LysX-M_at	CTATGAAATCGCGCTTCTTGAAGAC	AFFX-Cfa-r2-Ec-bioC-3_at	AATCGCTTTTTACCGCCAGATGAAA
AFFX-LysX-M_at	AATCGCGCTTCTTGAAGACCTATGT	AFFX-Cfa-r2-Ec-bioC-3_at	GAACGGCGTGCATTATCAACATCAT
AFFX-LysX-M_at	GTCACTCCATCGATGTTCTTCTTCG	AFFX-Cfa-r2-Ec-bioC-3_at	ATATTCAGCCCATCACGCTGTGGTT
AFFX-LysX-M_at	TTCGGATCACGCCCGGAGTAGAAGC	AFFX-Cfa-r2-Ec-bioC-3_at	TTTGATGATGCGCTCAGTGCCATGC
AFFX-LysX-M_at	GATCACGCCCGGAGTAGAAGCGCAT	AFFX-Cfa-r2-Ec-bioC-3_at	GCGTTCGCTGAAAGGCATCGGTGCC
AFFX-LysX-M_at	TAGAAGCGCATACGCATGACTACAT	AFFX-Cfa-r2-Ec-bioC-3_at	CGGTGCCACGCATCTTCATGAAGGG
AFFX-LysX-M_at	AGCGCATACGCATGACTACATTACA	AFFX-Cfa-r2-Ec-bioC-3_at	ATGAAGGGCGCGACCCGCGAATATT
AFFX-LysX-M_at	ATACGCATGACTACATTACAACGGG	AFFX-Cfa-r2-Ec-bioC-3_at	TAACGCGTTCGCAGTTGCAGCGATT
AFFX-LysX-M_at	TCGATCTTCATAACGGACAAACTGA	Cfa.10069.1.A1_at	ATGCTGTTTTAATTTCGCTGCACAA
AFFX-LysX-M_at	ATTACAATCGGAACACATTCAGCTG	Cfa.10069.1.A1_at	GCTGTTTTAATTTCGCTGCACAATG
AFFX-LysX-M_at	AATCGGAACACATTCAGCTGCTGGG	Cfa.10069.1.A1_at	TAATTTCGCTGCACAATGATTTATT
AFFX-LysX-M_at	AACACATTCAGCTGCTGGGTGTCCA	Cfa.10069.1.A1_at	TTCGCTGCACAATGATTTATTACCA
AFFX-LysX-M_at	CATTCAGCTGCTGGGTGTCCATTGC	Cfa.10069.1.A1_at	GCTGCACAATGATTTATTACCATTT
AFFX-LysX-M_at	AGCTGCTGGGTGTCCATTGCCATAT	Cfa.10069.1.A1_at	TTTTCTTGAAGCACATTTTTCCTTC
AF243438.CDS19.S1_s_at	TATACCTGCGTATGATGTAGACTTG	Cfa.10069.1.A1_at	TTTTCCTTCAGCTATGACCACCGCT
AF243438.CDS19.S1_s_at	AAGACTTTCTGAACTTTGGGAACAG	Cfa.10069.1.A1_at	TATGACCACCGCTCCCTATTAATGC
AF243438.CDS19.S1_s_at	TTGACACGAGCTACCAATAATCAGG	Cfa.10069.1.A1_at	TTAATGCCCTGCAACTATTTAATGC
AF243438.CDS19.S1_s_at	GGGTCATGAGGTTTCAATTTCCTAC	Cfa.10069.1.A1_at	ATGCCCTGCAACTATTTAATGCTGT
AF243438.CDS19.S1_s_at	AATTTCCTACTCGAACAGTGCGATA	Cfa.10069.1.A1_at	CCCTGCAACTATTTAATGCTGTTTT
AF243438.CDS19.S1_s_at	ATAACTTTACTACTCGCTCCTTACT	Cfa.10031.1.S1_at	GTAAGTGAAATTGTACCATTAAGTA
AF243438.CDS19.S1_s_at	ATTGGGCCAATAGTAACGAATCACG	Cfa.10031.1.S1_at	AAATTGACACAAGCTAGTATCAGGT
AF243438.CDS19.S1_s_at	GGAGGAGTTATGCAATTCGGTATTT	Cfa.10031.1.S1_at	ACAAGCTAGTATCAGGTGGATTTCA
AF243438.CDS19.S1_s_at	GACACGTATTCACGTTTATCTGGAT	Cfa.10031.1.S1_at	CAGGTGGATTTCAGGATTTCTCTAA
AF243438.CDS19.S1_s_at	AGCCATCGCGAAATATTTCCTCGTC	Cfa.10031.1.S1_at	GGTGGATTTCAGGATTTCTCTAAAT
AF243438.CDS19.S1_s_at	AGAAGATTTGCCTGACGGCCATCAT	Cfa.10031.1.S1_at	GATTTCTCTAAATGTCCCAGGGGGC
AFFX-Gga-r2-Ec-bioC-3_at	GCTGGTGCAGGGATCGTTACCCGAA	Cfa.10031.1.S1_at	ACTTTAACTTTCACTTTCAAATCTG
AFFX-Gga-r2-Ec-bioC-3_at	GTTACCCGAACGTCATCAGGCGTGG	Cfa.10031.1.S1_at	TAACTTTCACTTTCAAATCTGACAA
AFFX-Gga-r2-Ec-bioC-3_at	GAGCGTCCGCATGCTAATCGCTTTT	Cfa.10031.1.S1_at	CACTTTCAAATCTGACAAATCTTGT
AFFX-Gga-r2-Ec-bioC-3_at	AATCGCTTTTTACCGCCAGATGAAA	Cfa.10031.1.S1_at	GACAAATCTTGTTTATATGGTATAT
AFFX-Gga-r2-Ec-bioC-3_at	GAACGGCGTGCATTATCAACATCAT	Cfa.10031.1.S1_at	AAACCTTGTTTTCATCAGATTTGGG
AFFX-Gga-r2-Ec-bioC-3_at	ATATTCAGCCCATCACGCTGTGGTT	Cfa.10008.1.A1_at	AGATGCAGCTCCCATATGTCATGGA
AFFX-Gga-r2-Ec-bioC-3_at	TTTGATGATGCGCTCAGTGCCATGC	Cfa.10008.1.A1_at	AGGGAATTTCATAATGGTCTTCATG
AFFX-Gga-r2-Ec-bioC-3_at	GTGCCATGCGTTCGCTGAAAGGCAT	Cfa.10008.1.A1_at	GACCACAAGTGTCACCACAGCGAAT
AFFX-Gga-r2-Ec-bioC-3_at	GAAAGGCATCGGTGCCACGCATCTT	Cfa.10008.1.A1_at	GACATGTGTGTCTGTGCAGGATATC
AFFX-Gga-r2-Ec-bioC-3_at	ATGAAGGGCGCGACCCGCGAATATT	Cfa.10008.1.A1_at	TGATCAATCGTTTTGGAAGCACAGA
AFFX-Gga-r2-Ec-bioC-3_at	TAACGCGTTCGCAGTTGCAGCGATT	Cfa.10008.1.A1_at	GCACAGAAATCCAGCTTGAGTCCCA
AFFX-Gga-r2-Bs-lys-3_at	ATACGGCCGGTTTTGTGTTAGCAGC	Cfa.10008.1.A1_at	TCCAGCTTGAGTCCCATGAGCAATA
AFFX-Gga-r2-Bs-lys-3_at	GCCGGTTTTGTGTTAGCAGCGGAAA	Cfa.10008.1.A1_at	GATTAGGAATCCAGTCAGCCAGGAA
AFFX-Gga-r2-Bs-lys-3_at	GATTCATATTCATTTGTATCCAAGG	Cfa.10008.1.A1_at	TTGGAGATGGCAACATAGTGGTCAT
AFFX-Gga-r2-Bs-lys-3_at	ATTTGTATCCAAGGTGCTGAATCTT	Cfa.10008.1.A1_at	GGTCATAGGACATAGCAGCCAGAAG
AFFX-Gga-r2-Bs-lys-3_at	TCTTGGAGGAGGTTTCGGTATTCGT	Cfa.10008.1.A1_at	CCCTTTCTTTGGCAGATGGCTTAAT
AFFX-Gga-r2-Bs-lys-3_at	TTCGGTATTCGTTATACGGAAGATG	Cfa.10060.1.A1_at	GCCTCCTTTTATAATGCTTCTCAAC
AFFX-Gga-r2-Bs-lys-3_at	GAAGATGATGAACCGCTTCATGCCA	Cfa.10060.1.A1_at	GGGAAAACATTCTGACTGTGTGGCA
AFFX-Gga-r2-Bs-lys-3_at	GCTTCATGCCACTGAATACGTTGAA	Cfa.10060.1.A1_at	CTGTGTGGCAGGGTGATTTTCTTTC
AFFX-Gga-r2-Bs-lys-3_at	ATGCTTCCCGTTACGGTTTTGACAT	Cfa.10060.1.A1_at	GATTTTCTTTCTTGTGGCCACTTAC
AFFX-Gga-r2-Bs-lys-3_at	GACATTCCGGAAATTTGGATCGAAC	Cfa.10060.1.A1_at	TTATTGTTCTTGACCCTTTTATGCC
AFFX-Gga-r2-Bs-lys-3_at	TCGAACCGGGCCGTTCTCTCGTGGG	Cfa.10060.1.A1_at	TGACCCTTTTATGCCCTAGAATGCT
AF243438.CDS45.S1_s_at	GTTGTCCTACATGCGTATCTAGTGG	Cfa.10060.1.A1_at	GTGATTACGTTTGCACTGGATTGTG
AF243438.CDS45.S1_s_at	TGGAGATCCACGTTTGGGACGAAAC	Cfa.10060.1.A1_at	GGACACTTATGACTAATGAACTCTT
AF243438.CDS45.S1_s_at	GGGACGAAACGACAGAGCAGCTTTA	Cfa.10060.1.A1_at	AGAATCTAGTTGTGGCTGAGGCTGA
AF243438.CDS45.S1_s_at	TTTTGGCTTCTATAATTGTCTTGGG	Cfa.10060.1.A1_at	AGCTGCAGACAGCTGGACCTCCTAA
AF243438.CDS45.S1_s_at	TCGTGAAGCAGGATCGTCGGAATAT	Cfa.10060.1.A1_at	ACACGCATCAGACCTTGCAAGAGAT
AF243438.CDS45.S1_s_at	TGATGTATATCGTTTTCCCCGGAAA	AFFX-Cfa-r2-Bs-thr-3_s_at	GAAGGACACCCGGACAATGCTGGCG
AF243438.CDS45.S1_s_at	GAGTGCATGTAAGAGCTACCGCATA	AFFX-Cfa-r2-Bs-thr-3_s_at	GCGGACTTGTGATCGGCCTGCATGA
AF243438.CDS45.S1_s_at	GCTACCGCATAATTGCTCATGTATG	AFFX-Cfa-r2-Bs-thr-3_s_at	CGTAGTCGTTGTCATTCCTTTTTAT
AF243438.CDS45.S1_s_at	TGTATGGCGTACTAACTTTTTGTTA	AFFX-Cfa-r2-Bs-thr-3_s_at	GAGACGCGAGAGACGTGCTTCCGAA
AF243438.CDS45.S1_s_at	AGATTCTTGTGATGTGCCAGCGGTT	AFFX-Cfa-r2-Bs-thr-3_s_at	GAGTTTCCATATGCCGATGCCGTAA
AF243438.CDS45.S1_s_at	GCTATATTCAGCTTTCGACGAGTTT	AFFX-Cfa-r2-Bs-thr-3_s_at	ATATCCTCATTGCTGCGATCATGTC
AF243438.CDS71.S1_s_at	TACTGGATGAACCTGTACCACACAT	AFFX-Cfa-r2-Bs-thr-3_s_at	GATCATGTCCAAGGATTGGCCGCTT
AF243438.CDS71.S1_s_at	TACATCCCGTTCATATCTGCTGAGA	AFFX-Cfa-r2-Bs-thr-3_s_at	AAGGATATGTTCCATCAGCCGTACC
AF243438.CDS71.S1_s_at	GTTCTCCTGAAGATTGTCACGCGTT	AFFX-Cfa-r2-Bs-thr-3_s_at	TGCTTGTGCCTGAGCTGTCAAAAGT
AF243438.CDS71.S1_s_at	CACGCGTTTTTCTTTGGTCTGGCAA	AFFX-Cfa-r2-Bs-thr-3_s_at	AAGGGCGCATATGGAACGGCTCTCA
AF243438.CDS71.S1_s_at	GTCTGGCAACGGAAGCATCTGGGAA	AFFX-Cfa-r2-Bs-thr-3_s_at	AAAAGAACAGCTCGCGCTTCATTTC
AF243438.CDS71.S1_s_at	GAATATGTCTCAGCATGGCGCCGAA	AFFX-r2-Bs-thr-3_s_at	GTGATCGGCCTGCATGAGGATGACG
AF243438.CDS71.S1_s_at	GATGTCATCGTCAACATTGGCTCAA	AFFX-r2-Bs-thr-3_s_at	GACGAGACCCAAATGATCCGCGTCC
AF243438.CDS71.S1_s_at	ATTTTCCCACGCTACTATTCTGGAT	AFFX-r2-Bs-thr-3_s_at	GACGTAGTCGTTGTCATTCCTTTTT
AF243438.CDS71.S1_s_at	AGGACTGTGTTATCACTGCCATTGT	AFFX-r2-Bs-thr-3_s_at	ACGCGAGAGACGTGCTTCCGAAGGA
AF243438.CDS71.S1_s_at	GATGGCGTTACTTTGCAAGGATCTG	AFFX-r2-Bs-thr-3_s_at	GAAGGAGTTTCCATATGCCGATGCC
AF243438.CDS71.S1_s_at	CAAGGATCTGCGAATGTACTGTCAT	AFFX-r2-Bs-thr-3_s_at	TCCTCATTGCTGCGATCATGTCCAA
AF059717.CDS1.S1_at	ATGCATCCGGCAGTGGGTGGTAGCT	AFFX-r2-Bs-thr-3_s_at	GGATTGGCCGCTTGTCGGGAAAATC
AF059717.CDS1.S1_at	TGACTTTTCGAACCTCATCCAGGCA	AFFX-r2-Bs-thr-3_s_at	GAAGGATATGTTCCATCAGCCGTAC
AF059717.CDS1.S1_at	TTCGAACCTCATCCAGGCAGATCTA	AFFX-r2-Bs-thr-3_s_at	ATGCTTGTGCCTGAGCTGTCAAAAG
AF059717.CDS1.S1_at	ATCTAGGACAGATCAAGGCGCAGGA	AFFX-r2-Bs-thr-3_s_at	GAAGGGCGCATATGGAACGGCTCTC
AF059717.CDS1.S1_at	GATCAAGGCGCAGGATGACGCTCTG	AFFX-r2-Bs-thr-3_s_at	AAAGAACAGCTCGCGCTTCATTTCC
AF059717.CDS1.S1_at	TCAGCAGCCAGGATACGCAAGAAGA	AFFX-LysX-M_at	GATGGCGCTTGAGCACCGCATCGGC
AF059717.CDS1.S1_at	AGTCAACCAGACCAATACCATCAGC	AFFX-LysX-M_at	CGCTTGAGCACCGCATCGGCTGCAT
AF059717.CDS1.S1_at	GACCTTATTCTATACTACAAACACC	AFFX-LysX-M_at	GCACCGCATCGGCTGCATTGTGGTG
AF059717.CDS1.S1_at	TATACTACAAACACCAACCGTGTCC	AFFX-LysX-M_at	GCATCGGCTGCATTGTGGTGGATAA
AF059717.CDS1.S1_at	CAACCGTGTCCAAATTACCCAGAGA	AFFX-LysX-M_at	GGATAATTTCTATGAAATCGCGCTT
AF059717.CDS1.S1_at	CCAAATTACCCAGAGACATTTCGCT	AFFX-LysX-M_at	ATTTCTATGAAATCGCGCTTCTTGA
AF004856.CDS1.S1_s_at	TGACGACGAGGTTGCTCAGCAGTCT	AFFX-LysX-M_at	CTATGAAATCGCGCTTCTTGAAGAC
AF004856.CDS1.S1_s_at	GTGCTAACGTCCCTGCAGAAGACTA	AFFX-LysX-M_at	AATCGCGCTTCTTGAAGACCTATGT
AF004856.CDS1.S1_s_at	TGATGCATCATCACGTAGTCTCACT	AFFX-LysX-M_at	GTCACTCCATCGATGTTCTTCTTCG
AF004856.CDS1.S1_s_at	TAGTCTCACTCTTCCAAATTGTCTT	AFFX-LysX-M_at	TTCGGATCACGCCCGGAGTAGAAGC
AF004856.CDS1.S1_s_at	GGCCGTTAAATTTTCTCCGATGGTG	AFFX-LysX-M_at	GATCACGCCCGGAGTAGAAGCGCAT
AF004856.CDS1.S1_s_at	GATGGTGGCTACACTATCGCAACGT	AFFX-LysX-M_at	TAGAAGCGCATACGCATGACTACAT
AF004856.CDS1.S1_s_at	ATCGCAACGTGATGCTGGCCCTGTA	AFFX-LysX-M_at	AGCGCATACGCATGACTACATTACA
AF004856.CDS1.S1_s_at	GAGTCATACCATCACGTGGGTCATC	AFFX-LysX-M_at	ATACGCATGACTACATTACAACGGG
AF004856.CDS1.S1_s_at	TCAAAGTCAGCTTTCGCATGCGCTA	AFFX-LysX-M_at	TCGATCTTCATAACGGACAAACTGA
AF004856.CDS1.S1_s_at	AGCCAGCTGAATGTGAATCTCGTCT	AFFX-LysX-M_at	ATTACAATCGGAACACATTCAGCTG
AF004856.CDS1.S1_s_at	GGACATGCTCGCACTATGCTTGGAC	AFFX-LysX-M_at	AATCGGAACACATTCAGCTGCTGGG
AFFX-BioC-3_at	TACCCGAACGTCATCAGGCGTGGCA	AFFX-LysX-M_at	AACACATTCAGCTGCTGGGTGTCCA
AFFX-BioC-3_at	GGTGGACGAGCGTCCGCATGCTAAT	AFFX-LysX-M_at	CATTCAGCTGCTGGGTGTCCATTGC
AFFX-BioC-3_at	CGTCCGCATGCTAATCGCTTTTTAC	AFFX-LysX-M_at	AGCTGCTGGGTGTCCATTGCCATAT
AFFX-BioC-3_at	TTTACCGCCAGATGAAATCGAACAG	Cfa.10037.1.A1_at	ACGGCGGACTACATTTCCCATCATG
AFFX-BioC-3_at	GATGAAATCGAACAGTCGCTGAACG	Cfa.10037.1.A1_at	CACTGCGGTCCTCACTAAACAAAAA
AFFX-BioC-3_at	AACAGTCGCTGAACGGCGTGCATTA	Cfa.10037.1.A1_at	AGGAAGTCGATTCCTTCACCTGGAT
AFFX-BioC-3_at	ACATCATATTCAGCCCATCACGCTG	Cfa.10037.1.A1_at	GCCGACTGCGTTGGAGACTTTTCAC
AFFX-BioC-3_at	TTCAGCCCATCACGCTGTGGTTTGA	Cfa.10037.1.A1_at	TAAGTTCCCGGTCAGATGTGTTTGT
AFFX-BioC-3_at	ATCACGCTGTGGTTTGATGATGCGC	Cfa.10037.1.A1_at	TAAGTTGCACTGTCCTGGTTGAGGC
AFFX-BioC-3_at	GGTTTGATGATGCGCTCAGTGCCAT	Cfa.10037.1.A1_at	GAGGCTTCGGTTGCGTCTCATGAAA
AFFX-BioC-3_at	ATGATGCGCTCAGTGCCATGCGTTC	Cfa.10037.1.A1_at	AGGCTGTGAGAACCCTGTCCTGTGT
AFFX-BioC-3_at	CTCAGTGCCATGCGTTCGCTGAAAG	Cfa.10037.1.A1_at	TGTCCTGTGTCTTCGGCTCGATAGA
AFFX-BioC-3_at	CATGCGTTCGCTGAAAGGCATCGGT	Cfa.10037.1.A1_at	GTGGACTCCCAAACAAGTTGCCAAC
AFFX-BioC-3_at	CTGAAAGGCATCGGTGCCACGCATC	Cfa.10037.1.A1_at	CTCGTCCTTCTGTATTTTTGTGCAT
AFFX-BioC-3_at	GGCATCGGTGCCACGCATCTTCATG	AFFX-Cf_Gapdh_3_at	AGCTCACTGGCATGGCCTTCCGTGT
AFFX-BioC-3_at	TGCCACGCATCTTCATGAAGGGCGC	AFFX-Cf_Gapdh_3_at	ACCCCCAATGTATCAGTTGTGGATC
AFFX-BioC-3_at	ATCTTCATGAAGGGCGCGACCCGCG	AFFX-Cf_Gapdh_3_at	CGCCTGGAGAAAGCTGCCAAATATG
AFFX-BioC-3_at	ATTAACGCGTTCGCAGTTGCAGCGA	AFFX-Cf_Gapdh_3_at	GAAAGCTGCCAAATATGACGACATC
AFFX-BioC-3_at	GCGTTCGCAGTTGCAGCGATTGCAA	AFFX-Cf_Gapdh_3_at	CAAATATGACGACATCAAGAAGGTA
AFFX-BioC-3_at	AGTTGCAGCGATTGCAACTGGCCTG	AFFX-Cf_Gapdh_3_at	ACGACATCAAGAAGGTAGTGAAGCA
AF243438.CDS84.S1_s_at	ATGACACTTACGTTGACCGAGCTCG	AFFX-Cf_Gapdh_3_at	AGCAGGCATCGGAGGGACCCCTCAA
AF243438.CDS84.S1_s_at	GAACATTGCGCTGCATCAGATCCAG	AFFX-Cf_Gapdh_3_at	GGCATCGGAGGGACCCCTCAAAGGC
AF243438.CDS84.S1_s_at	TCGGGAATATCCCTTACTCCTGTAA	AFFX-Cf_Gapdh_3_at	GTGACTTCAACAGTGACACCCACTC
AF243438.CDS84.S1_s_at	AGACCACCGCGTCTATGTCGGAAGC	AFFX-Cf_Gapdh_3_at	CTGGCATTGCCCTCAATGACCACTT
AF243438.CDS84.S1_s_at	TAGCCGGTTTTACAGGCGCATTGTA	AFFX-Cf_Gapdh_3_at	GCCCTCAATGACCACTTTGTCAAGC
AF243438.CDS84.S1_s_at	CATTGTAATTCCTGAGACTGCTCCG	AFFX-Cf_Gapdh_3_at	CCACTTTGTCAAGCTCATTTCCTGG
AF243438.CDS84.S1_s_at	GCCACGCTACGATCTATCGGACGAA	AFFX-Cf_Gapdh_3_at	TTCCTGGTATGACAATGAATTTGGC
AF243438.CDS84.S1_s_at	GAACCACATGCACCTGGAACGACAA	AFFX-Cf_Gapdh_3_at	AATGAATTTGGCTACAGCAACCGGG
AF243438.CDS84.S1_s_at	GAACGACAATGATCTCCGGACCGAG	AFFX-Cf_Gapdh_3_at	AATTTGGCTACAGCAACCGGGTGGT
AF243438.CDS84.S1_s_at	GAACCATGTTCGTTTTTACGCCACG	AFFX-Cf_Gapdh_3_at	GTGGTGGACCTCATGGTCTACATGG
AF243438.CDS84.S1_s_at	GCGGGTCAACACAGGCCGTTAATGA	AFFX-Cfa-actin-M_x_at	CTAGGCGGACTGTTACTTTAGTTGC
AF243438.CDS10.S1_s_at	AGCATACAGAGAGTACTTCCCGAAA	AFFX-Cfa-actin-M_x_at	TAGGCGGACTGTTACTTTAGTTGCG
AF243438.CDS10.S1_s_at	ATATATGGATTTACTTGTCGAAGCT	AFFX-Cfa-actin-M_x_at	AGGCGGACTGTTACTTTAGTTGCGT
AF243438.CDS10.S1_s_at	TTACTTGTCGAAGCTGAACGGGAAA	AFFX-Cfa-actin-M_x_at	GCGGACTGTTACTTTAGTTGCGTTA
AF243438.CDS10.S1_s_at	ATATCATACTTGACGTTAGCACAAA	AFFX-Cfa-actin-M_x_at	GGACTGTTACTTTAGTTGCGTTACA
AF243438.CDS10.S1_s_at	GTATAATGTTTGCAACTGGAACGTT	AFFX-Cfa-actin-M_x_at	GACTGTTACTTTAGTTGCGTTACAC
AF243438.CDS10.S1_s_at	GGTACAAAGATCCAAGTTCCTGTTT	AFFX-Cfa-actin-M_x_at	ACCACCACCGCCGAGCGGGAAATCG
AF243438.CDS10.S1_s_at	AAGATCCAAGTTCCTGTTTGCAACA	AFFX-Cfa-actin-M_x_at	CAGGAGATGGCCACCGCGGCCTCCA
AF243438.CDS10.S1_s_at	AAGTTCCTGTTTGCAACAGCACTAA	AFFX-Cfa-actin-M_x_at	GGGCATGGAATCCTGCGGCATCCAT
AF243438.CDS10.S1_s_at	AACAGCACTAATCTAGCTCTGGCCT	AFFX-Cfa-actin-M_x_at	GAATCCTGCGGCATCCATGAAACTA
AF243438.CDS10.S1_s_at	TAGCTCTGGCCTTTCTTGCGGGATT	AFFX-Cfa-actin-M_x_at	TCCATGAAACTACCTTCAACTCCAT
AF243438.CDS10.S1_s_at	TTGCGGGATTTCTGACTCGACATGT	AFFX-BioC-3_at	TACCCGAACGTCATCAGGCGTGGCA
AFFX-DapX-5_at	TGGCAGAACGAACACCACATTTTGA	AFFX-BioC-3_at	GGTGGACGAGCGTCCGCATGCTAAT
AFFX-DapX-5_at	TATCTGATGTGATGCCTGTTGAGTC	AFFX-BioC-3_at	CGTCCGCATGCTAATCGCTTTTTAC
AFFX-DapX-5_at	GTGATGCCTGTTGAGTCAGATGCTT	AFFX-BioC-3_at	TTTACCGCCAGATGAAATCGAACAG
AFFX-DapX-5_at	TTGAGTCAGATGCTTTCATTTACAC	AFFX-BioC-3_at	GATGAAATCGAACAGTCGCTGAACG
AFFX-DapX-5_at	TGCTTTCATTTACACAGATATCCAT	AFFX-BioC-3_at	AACAGTCGCTGAACGGCGTGCATTA
AFFX-DapX-5_at	TACACAGATATCCATGCCTGTTTTA	AFFX-BioC-3_at	ACATCATATTCAGCCCATCACGCTG
AFFX-DapX-5_at	GATATCCATGCCTGTTTTACAGAAA	AFFX-BioC-3_at	TTCAGCCCATCACGCTGTGGTTTGA
AFFX-DapX-5_at	AAAAATTGCATTAGAGCACGGAGTC	AFFX-BioC-3_at	ATCACGCTGTGGTTTGATGATGCGC
AFFX-DapX-5_at	AGGGATCGGAGCCATCATCGCGCCA	AFFX-BioC-3_at	GGTTTGATGATGCGCTCAGTGCCAT
AFFX-DapX-5_at	GAGCCATCATCGCGCCAAATTTTGC	AFFX-BioC-3_at	ATGATGCGCTCAGTGCCATGCGTTC
AFFX-DapX-5_at	TCATCGCGCCAAATTTTGCGCTCGG	AFFX-BioC-3_at	CTCAGTGCCATGCGTTCGCTGAAAG
AFFX-DapX-5_at	AAATTTTGCGCTCGGTGCGATACTG	AFFX-BioC-3_at	CATGCGTTCGCTGAAAGGCATCGGT
AFFX-DapX-5_at	CGCTCGGTGCGATACTGATGATGAA	AFFX-BioC-3_at	CTGAAAGGCATCGGTGCCACGCATC
AFFX-DapX-5_at	TGCCAACTATTTTGAGGATGTTGAG	AFFX-BioC-3_at	GGCATCGGTGCCACGCATCTTCATG
AFFX-DapX-5_at	GAGATTATTGAGCTTCATCATGACC	AFFX-BioC-3_at	TGCCACGCATCTTCATGAAGGGCGC
AFFX-DapX-5_at	AGCTTCATCATGACCAGAAGCTTGA	AFFX-BioC-3_at	ATCTTCATGAAGGGCGCGACCCGCG
AFFX-DapX-5_at	CATGACCAGAAGCTTGACGCACCAA	AFFX-BioC-3_at	ATTAACGCGTTCGCAGTTGCAGCGA
AFFX-DapX-5_at	GAAGCTTGACGCACCAAGCGGAACT	AFFX-BioC-3_at	GCGTTCGCAGTTGCAGCGATTGCAA
AFFX-DapX-5_at	CAAGCGGAACTGCGCTTAAAACAGC	AFFX-BioC-3_at	AGTTGCAGCGATTGCAACTGGCCTG
AFFX-DapX-5_at	AGCAGCAAGGACATCCGGATGAAAA	Cfa.10069.1.A1_s_at	GGAAAGAACATGATACATACTGTCA
AFFX-Gga-r2-Bs-dap-M_at	AATTGCTTTGATCGCGCATGACAAG	Cfa.10069.1.A1_s_at	ATTCCGCAGTGGTATATAATATTTC
AFFX-Gga-r2-Bs-dap-M_at	ATGGTTCAATTTACGACTGCCTATC	Cfa.10069.1.A1_s_at	GTATATAATATTTCACGGGTCCTCA
AFFX-Gga-r2-Bs-dap-M_at	GAATCATGATCTATACGCAACCGGA	Cfa.10069.1.A1_s_at	AATATTTCACGGGTCCTCATCATTA
AFFX-Gga-r2-Bs-dap-M_at	AAATCGGTGCACTGATCGCTGCCAA	Cfa.10069.1.A1_s_at	TTCACGGGTCCTCATCATTAGGTAT
AFFX-Gga-r2-Bs-dap-M_at	GCCAATGCACTCGATCTTGTCATTT	Cfa.10069.1.A1_s_at	GGTCCTCATCATTAGGTATTGTCCA
AFFX-Gga-r2-Bs-dap-M_at	GGATGTCTCGGCATTAATCCGTTTA	Cfa.10069.1.A1_s_at	AGGTATTGTCCAAACGAACATCACA
AFFX-Gga-r2-Bs-dap-M_at	ATGTGATGTGTATTCCATTCCGCTC	Cfa.10069.1.A1_s_at	GAACATCACAAATATACTCATGCTG
AFFX-Gga-r2-Bs-dap-M_at	ATTCCGCTCGCCACAAATATGGGTA	Cfa.10069.1.A1_s_at	ATACTCATGCTGTACCATTTCTGAT
AFFX-Gga-r2-Bs-dap-M_at	GTGTTTTCGAATTCCGTGACCTTCT	Cfa.10069.1.A1_s_at	GCTGTACCATTTCTGATTAAACTGT
AFFX-Gga-r2-Bs-dap-M_at	TAATGCTGACGTTCTTGCTTTTGGC	Cfa.10069.1.A1_s_at	GTGTAACATCACTAGAAAACTTAGT
AFFX-Gga-r2-Bs-dap-M_at	TTTTGGCGCCCACAGTGATGATGTC	AFFX-r2-Bs-dap-5_at	ACACCACATTTTGACCTTGTAGGGG
AF243438.CDS87.S1_s_at	TGTTTACTGGGCATGGCCATCTCAA	AFFX-r2-Bs-dap-5_at	GGCCATAGACCATACATACGATCAG
AF243438.CDS87.S1_s_at	ATGTTTGCCTACAGGGCTTTGGTCG	AFFX-r2-Bs-dap-5_at	ATTATCTGATGTGATGCCTGTTGAG
AF243438.CDS87.S1_s_at	GCAATCGTTCAGCAGGACACAATTT	AFFX-r2-Bs-dap-5_at	ACAACCGGATGTCTTGATTGATTTA
AF243438.CDS87.S1_s_at	ACACAATTTGACTCGGTGGGCCGGT	AFFX-r2-Bs-dap-5_at	TCTTGATTGATTTAACAACGCCCGA
AF243438.CDS87.S1_s_at	ACTATTTGAAGTACACCGGCGCGGG	AFFX-r2-Bs-dap-5_at	TTAGAGCACGGAGTCCGTCCAGTTG
AF243438.CDS87.S1_s_at	GGTACAAACCTGATACCGCACTTTG	AFFX-r2-Bs-dap-5_at	ACAACCGGTTTCTCAGAAGCTGATT
AF243438.CDS87.S1_s_at	GGATCGAGAACATTAGCCGCGACAT	AFFX-r2-Bs-dap-5_at	GAAAAAGGGATCGGAGCCATCATCG
AF243438.CDS87.S1_s_at	TCTCGGGCAGCAATCAGATACGTAT	AFFX-r2-Bs-dap-5_at	CCAAATTTTGCGCTCGGTGCGATAC
AF243438.CDS87.S1_s_at	CCTGGTATTGGAGCATGGCCTAAAT	AFFX-r2-Bs-dap-5_at	CTCGGTGCGATACTGATGATGAAAT
AF243438.CDS87.S1_s_at	TCATCTACTTCACAACTCTGCTAGT	AFFX-r2-Bs-dap-5_at	TCATCATGACCAGAAGCTTGACGCA
AF243438.CDS87.S1_s_at	AAGAGCCTTTTGTGCTTAGTCGATG	AFFX-r2-Ec-bioD-3_at	TTCTGACACTTTCACTTTTGCAGAT
AF243438.CDS13.S1_s_at	GGCCCGGACCAATTGCAATCCAGAA	AFFX-r2-Ec-bioD-3_at	TGACACTTTCACTTTTGCAGATTGG
AF243438.CDS13.S1_s_at	GGATGAACCTGAACTTCGCTTGAAC	AFFX-r2-Ec-bioD-3_at	ACTTTTGCAGATTGGGTAACACAGG
AF243438.CDS13.S1_s_at	AAGGACTCCCACTTTGGACTTGGAT	AFFX-r2-Ec-bioD-3_at	AACAACTGCCGGTGATACTGGTAGT
AF243438.CDS13.S1_s_at	ACTTGGATACCGTTGTCGTTCGAGA	AFFX-r2-Ec-bioD-3_at	GCCGGTGATACTGGTAGTTGGTGTG
AF243438.CDS13.S1_s_at	TGTCGTTCGAGATCACCCAGTAACA	AFFX-r2-Ec-bioD-3_at	AACTCGGCTGTATTAATCACGCGAT
AF243438.CDS13.S1_s_at	TGAAAATCTCTCATATACTCCCCAA	AFFX-r2-Ec-bioD-3_at	CACAGGTAATACAACACGCCGGACT
AF243438.CDS13.S1_s_at	TAATCCATTCTTCCCCAGATAGTGA	AFFX-r2-Ec-bioD-3_at	ACAACACGCCGGACTGACTCTGGCG
AF243438.CDS13.S1_s_at	AGGAGATTTATGCTCAGCCCGACCC	AFFX-r2-Ec-bioD-3_at	GTCACGCTGAATATATGACCACGCT
AF243438.CDS13.S1_s_at	ATCGTGAACGCACTCCAGATGATCA	AFFX-r2-Ec-bioD-3_at	TCACGCTGAATATATGACCACGCTC
AF243438.CDS13.S1_s_at	TTACGGATGATAGCGCAGACTGGTC	AFFX-r2-Ec-bioD-3_at	TGCTGGGAGAGATCCCCTGGCTTGC
AF243438.CDS13.S1_s_at	TCTGAGGGCGAAACACGTCGACCAT	AFFX-Cfa-TrpnX-3_at	GGCGCGAGCTGTACTTATCGGTGAA
AFFX-r2-Ec-bioB-M_at	TGTATGACGCTGGGCACGTTGAGTG	AFFX-Cfa-TrpnX-3_at	GACAAACTTCTCAGCGTAAAGCAAT
AFFX-r2-Ec-bioB-M_at	GCTGGGCACGTTGAGTGAATCTCAG	AFFX-Cfa-TrpnX-3_at	AATATTGCGGTATTCGGTCACTAAA
AFFX-r2-Ec-bioB-M_at	CACGCACTTATCAGGAACGCCTCGA	AFFX-Cfa-TrpnX-3_at	AAAGGATTTGCAGCTTGCGGCGGAA
AFFX-r2-Ec-bioB-M_at	TGCCGGGATCAAAGTCTGTTCTGGC	AFFX-Cfa-TrpnX-3_at	GCTTGCGGCGGAATCACAGGCTGAT
AFFX-r2-Ec-bioB-M_at	CCGGGATCAAAGTCTGTTCTGGCGG	AFFX-Cfa-TrpnX-3_at	ATGGCTGAACCAAGTTCGTGTCGAA
AFFX-r2-Ec-bioB-M_at	CGGGATCAAAGTCTGTTCTGGCGGC	AFFX-Cfa-TrpnX-3_at	ACGATGTCACGTATTGCCAAGAGCT
AFFX-r2-Ec-bioB-M_at	GCATTGTGGGCTTAGGCGAAACGGT	AFFX-Cfa-TrpnX-3_at	GACGTCATTCAGCTTCACGGTGATG
AFFX-r2-Ec-bioB-M_at	AAAAGATCGCGCCGGATTATTGCTG	AFFX-Cfa-TrpnX-3_at	CTCTTCGCAAGCTGACAGGCTGTGA
AFFX-r2-Ec-bioB-M_at	AGATCGCGCCGGATTATTGCTGCAA	AFFX-Cfa-TrpnX-3_at	GACGGCTTTGTGATTGATTCATCTG
AFFX-r2-Ec-bioB-M_at	CCGGATTATTGCTGCAACTGGCAAA	AFFX-Cfa-TrpnX-3_at	GAGGCGGAACTGGTGTTGCATTTTC
AFFX-r2-Ec-bioB-M_at	CGGAAAGCGTGCCAATCAACATGCT	AFFX-DapX-5_at	TGGCAGAACGAACACCACATTTTGA
AFFX-TrpnX-3_at	TTAACATTTGTCAATGAACATGGGG	AFFX-DapX-5_at	TATCTGATGTGATGCCTGTTGAGTC
AFFX-TrpnX-3_at	GCGAGCTGTACTTATCGGTGAATCA	AFFX-DapX-5_at	GTGATGCCTGTTGAGTCAGATGCTT
AFFX-TrpnX-3_at	ATGAGACAAACTTCTCAGCGTAAAG	AFFX-DapX-5_at	TTGAGTCAGATGCTTTCATTTACAC
AFFX-TrpnX-3_at	TCTCAGCGTAAAGCAATCCATGCTT	AFFX-DapX-5_at	TGCTTTCATTTACACAGATATCCAT
AFFX-TrpnX-3_at	GTCACTAAAGGATTTGCAGCTTGCG	AFFX-DapX-5_at	TACACAGATATCCATGCCTGTTTTA
AFFX-TrpnX-3_at	TTTGCAGCTTGCGGCGGAATCACAG	AFFX-DapX-5_at	GATATCCATGCCTGTTTTACAGAAA
AFFX-TrpnX-3_at	GCGGCGGAATCACAGGCTGATTACC	AFFX-DapX-5_at	AAAAATTGCATTAGAGCACGGAGTC
AFFX-TrpnX-3_at	ATCAATAGAGACGATGTCACGTATT	AFFX-DapX-5_at	AGGGATCGGAGCCATCATCGCGCCA
AFFX-TrpnX-3_at	ACGATGTCACGTATTGCCAAGAGCT	AFFX-DapX-5_at	GAGCCATCATCGCGCCAAATTTTGC
AFFX-TrpnX-3_at	GTATTGCCAAGAGCTTGAAGCTCGA	AFFX-DapX-5_at	TCATCGCGCCAAATTTTGCGCTCGG
AFFX-TrpnX-3_at	GAGCTTGAAGCTCGACGTCATTCAG	AFFX-DapX-5_at	AAATTTTGCGCTCGGTGCGATACTG
AFFX-TrpnX-3_at	CTCGACGTCATTCAGCTTCACGGTG	AFFX-DapX-5_at	CGCTCGGTGCGATACTGATGATGAA
AFFX-TrpnX-3_at	TTCAGCTTCACGGTGATGAAAAACC	AFFX-DapX-5_at	TGCCAACTATTTTGAGGATGTTGAG
AFFX-TrpnX-3_at	GGATGCTGCTGCTCTTCGCAAGCTG	AFFX-DapX-5_at	GAGATTATTGAGCTTCATCATGACC
AFFX-TrpnX-3_at	AGCTGACAGGCTGTGAAATATGGAA	AFFX-DapX-5_at	AGCTTCATCATGACCAGAAGCTTGA
AFFX-TrpnX-3_at	GCGCTTCACCATCAAGATAACACAA	AFFX-DapX-5_at	CATGACCAGAAGCTTGACGCACCAA
AFFX-TrpnX-3_at	ATGTTGACGGCTTTGTGATTGATTC	AFFX-DapX-5_at	GAAGCTTGACGCACCAAGCGGAACT
AFFX-TrpnX-3_at	TTGATTCATCTGTAAAAGGGTCTAG	AFFX-DapX-5_at	CAAGCGGAACTGCGCTTAAAACAGC
AFFX-TrpnX-3_at	TGGGAATGTGTGCCGGAATATCAGC	AFFX-DapX-5_at	AGCAGCAAGGACATCCGGATGAAAA
AFFX-TrpnX-3_at	TGCCGGAATATCAGCAGGCGGCTAT	Cfa.10079.1.A1_at	CTGGCTCTTTGCAGCTATTGTTTGT
AFFX-r2-TagH_at	GTCAGGCAATGTGTCCGAACGGCGA	Cfa.10079.1.A1_at	GTAGCCTTTGTAATGGCAGCAGCAT
AFFX-r2-TagH_at	ACGTCGCCTCACGGAGTAATCGCGT	Cfa.10079.1.A1_at	TGGTTTGGTTTGTGTGTCCCCTGCC
AFFX-r2-TagH_at	TAGTGCCGTCGGTTCAGGTCATATG	Cfa.10079.1.A1_at	TGTCCCCTGCCCTAAATGTCTGTAG
AFFX-r2-TagH_at	TCGGACCTAAACCGTAGCTCTCGGC	Cfa.10079.1.A1_at	ATGTCTGTAGGTTCTGTCTTCTGCA
AFFX-r2-TagH_at	AGATCGTCCTCGTCTCGAATATAGC	Cfa.10079.1.A1_at	GTGACTCTGTAGCTAGCACAGCTGA
AFFX-r2-TagH_at	GTCACCGCTATCTCGTAAGGGGTCC	Cfa.10079.1.A1_at	GATCGGGCATTCAGGCCATTGGTAT
AFFX-r2-TagH_at	TTGGATGGTGCAGCTTACTTCGCGT	Cfa.10079.1.A1_at	ATTGCCAAGCAGATCTCACTGATGT
AFFX-r2-TagH_at	AGTCCTCTGCATCTATAATCGCGTA	Cfa.10079.1.A1_at	ATGTATATTTTAGTTCCCACCCAGG
AFFX-r2-TagH_at	TCTAAGCGCTCGATATTCCACCTAA	Cfa.10079.1.A1_at	TGGCCCATATTGTACCTTTTCATTC
AFFX-r2-TagH_at	TGGCAGCCGAATGGACTATCGCTCC	Cfa.10079.1.A1_at	TATCTGGCCAGGAAAGTCTTTAATT
AFFX-r2-TagH_at	TATCGCCATGTCTGTCAACTGTACT	Cfa.10005.1.A1_at	AAAATGAATAGCCAATCCACCCACC
AF243438.CDS52.S1_s_at	GAGTGCGGTCCAATAACGCTATTAC	Cfa.10005.1.A1_at	AGCCTAGAAGCCCTGTGAAATCGAG
AF243438.CDS52.S1_s_at	CCGCGATCGTAGGTTGGGTATTGCA	Cfa.10005.1.A1_at	AGCTCACGGTGCCTAACCCAAAAGG
AF243438.CDS52.S1_s_at	AAGTAGATCTACGTGGTCGTCCCAC	Cfa.10005.1.A1_at	GAGCAGATCCTTGAATCAGCTGTCA
AF243438.CDS52.S1_s_at	TATGCTGCATATTGTCGTTTGGGAC	Cfa.10005.1.A1_at	TCAGCTGTCACCTCTTCTATAGAAT
AF243438.CDS52.S1_s_at	AATTCGAACGTTGTGGATCCCTAGA	Cfa.10005.1.A1_at	TAACCTGCGCTGGAAATTGCCGTTG
AF243438.CDS52.S1_s_at	ATCCCTAGATATCCCCGTTATATGG	Cfa.10005.1.A1_at	GCCGTTGGCTTTGTACATCTCTATA
AF243438.CDS52.S1_s_at	CATGCCAAGGTCCTCCGTATATGTT	Cfa.10005.1.A1_at	GACGGATGCTGCTGCTCACTCGTAA
AF243438.CDS52.S1_s_at	TCCCGCATGTGCCTATATCGATTTT	Cfa.10005.1.A1_at	GCTTGCTGCACCTTAATAGCTGGTT
AF243438.CDS52.S1_s_at	GGAAAGGTCTTCATCATCTCTATAC	Cfa.10005.1.A1_at	AATTGTTGGCTAACGCTGTCGGAGA
AF243438.CDS52.S1_s_at	CATCATCTCTATACCTTGTGTTCGT	Cfa.10005.1.A1_at	AACGCTGTCGGAGATTACTTGCTGA
AF243438.CDS52.S1_s_at	AATTCGGGCGTGAAACTGTTCGGAT	AFFX-Cfa-r2-Bs-phe-3_at	GATATGGCAGCTTCTACATACGAAT
AFFX-Gga-gapdh-M_a_at	GTGGTGCTAAGCGTGTTATCATCTC	AFFX-Cfa-r2-Bs-phe-3_at	AAGATTTATTATCCTGTCTCCCGAT
AFFX-Gga-gapdh-M_a_at	AAGCGTGTTATCATCTCAGCTCCCT	AFFX-Cfa-r2-Bs-phe-3_at	GTCTCCCGATGAAAACATATCTTTT
AFFX-Gga-gapdh-M_a_at	CCATGTTTGTGATGGGTGTCAACCA	AFFX-Cfa-r2-Bs-phe-3_at	ATTCAAAATTGAGCTCTAGGCCCAA
AFFX-Gga-gapdh-M_a_at	AATTGTCAGCAATGCATCGTGCACC	AFFX-Cfa-r2-Bs-phe-3_at	GAGCTCTAGGCCCAAAACGACCTTA
AFFX-Gga-gapdh-M_a_at	GGCACCCTTGGCCAAGGTCATCCAT	AFFX-Cfa-r2-Bs-phe-3_at	AAACGACCTTAATGGTCATGCTGCC
AFFX-Gga-gapdh-M_a_at	GGTCATCCATGACAACTTTGGCATT	AFFX-Cfa-r2-Bs-phe-3_at	ATGCTGCCGCAGGATGATCAGTCCG
AFFX-Gga-gapdh-M_a_at	AACTTTGGCATTGTGGAGGGTCTTA	AFFX-Cfa-r2-Bs-phe-3_at	GGCGCTGCATAGAGTGCTGTCTGCA
AFFX-Gga-gapdh-M_a_at	GAGGGTCTTATGACCACTGTCCATG	AFFX-Cfa-r2-Bs-phe-3_at	GTGCTGTCTGCATTTTCTTGGAGAA
AFFX-Gga-gapdh-M_a_at	TGCCATCACAGCCACACAGAAGACG	AFFX-Cfa-r2-Bs-phe-3_at	TTCTTGGAGAAATTTAAACCTGTCA
AFFX-Gga-gapdh-M_a_at	ACAGAAGACGGTGGATGGCCCCTCT	AFFX-Cfa-r2-Bs-phe-3_at	ATTGAGTCACGTCCGACTAAAACCG
AFFX-Gga-gapdh-M_a_at	CCCCTCTGGGAAGCTGTGGAGAGAT	AFFX-Cfa-ef1a-3_x_at	GCAAACCTATGTGTGTTGAGAGCTT
AFFX-CreX-5_at	GCCAGGCGTTTTCTGAGCATACCTG	AFFX-Cfa-ef1a-3_x_at	TCTGGGCCGTTTTGCTGTTCGTGAC
AFFX-CreX-5_at	GCGGCATGGTGCAAGTTGAATAACC	AFFX-Cfa-ef1a-3_x_at	CTGGGCCGTTTTGCTGTTCGTGACA
AFFX-CreX-5_at	GAAGATGTTCGCGATTATCTTCTAT	AFFX-Cfa-ef1a-3_x_at	GGCCGTTTTGCTGTTCGTGACATGA
AFFX-CreX-5_at	TCTATATCTTCAGGCGCGCGGTCTG	AFFX-Cfa-ef1a-3_x_at	GCCGTTTTGCTGTTCGTGACATGAG
AFFX-CreX-5_at	GCAACATTTGGGCCAGCTAAACATG	AFFX-Cfa-ef1a-3_x_at	GGACAAGAAGGCAGCTGGAGCTGGC
AFFX-CreX-5_at	CCAGCTAAACATGCTTCATCGTCGG	AFFX-Cfa-ef1a-3_x_at	AATATTATCCCTAATACCTGCCACC
AFFX-CreX-5_at	CCGGGCTGCCACGACCAAGTGACAG	AFFX-Cfa-ef1a-3_x_at	ATATTATCCCTAATACCTGCCACCC
AFFX-CreX-5_at	GACCAAGTGACAGCAATGCTGTTTC	AFFX-Cfa-ef1a-3_x_at	TATTATCCCTAATACCTGCCACCCC
AFFX-CreX-5_at	AATGCTGTTTCACTGGTTATGCGGC	AFFX-Cfa-ef1a-3_x_at	ATTATCCCTAATACCTGCCACCCCA
AFFX-CreX-5_at	ATGCCGGTGAACGTGCAAAACAGGC	AFFX-Cfa-ef1a-3_x_at	TTATCCCTAATACCTGCCACCCCAG
AFFX-CreX-5_at	ACGTGCAAAACAGGCTCTAGCGTTC	AFFX-r2-TagC_at	TCTGAACCTGTCCATAGTATCCTGT
AFFX-CreX-5_at	ATTTGCCTGCATTACCGGTCGATGC	AFFX-r2-TagC_at	AAGCGTCCAATGTACCTATATCGTG
AFFX-CreX-5_at	CTCTAGCGTTCGAACGCACTGATTT	AFFX-r2-TagC_at	GGCTGTGCCTAACGAATCTGGGACG
AFFX-CreX-5_at	TCGTTCACTCATGGAAAATAGCGAT	AFFX-r2-TagC_at	ACGTGCCTAAGTAATCTGGTCCGCG
AFFX-CreX-5_at	ATGGAAAATAGCGATCGCTGCCAGG	AFFX-r2-TagC_at	GTACGGTGATCGTGGACGCTTGACC
AFFX-CreX-5_at	TACCGGTCGATGCAACGAGTGATGA	AFFX-r2-TagC_at	TTATTGGATGGCGTTCCGTCCTATT
AFFX-CreX-5_at	TCAGGGTTAAAGATATCTCACGTAC	AFFX-r2-TagC_at	GCTAAGCCATTACGCGACATTCTGC
AFFX-CreX-5_at	GAGTGATGAGGTTCGCAAGAACCTG	AFFX-r2-TagC_at	CAAAGTTACGTCGCATTCTCTCACG
AFFX-CreX-5_at	GCAAGAACCTGATGGACATGTTCAG	AFFX-r2-TagC_at	TACGGCTGATTCTCTAGGCTTACGC
AFFX-CreX-5_at	GACATGTTCAGGGATCGCCAGGCGT	AFFX-r2-TagC_at	CTTACGCGCATGAGCTCTAGGTTCC
AF176592.CDS1.S1_s_at	GACAGGTACCTGTTACTAAGGTCCA	AFFX-r2-TagC_at	TGCGTAGTTCTGTCATAGCGTCGAG
AF176592.CDS1.S1_s_at	ATTACCTGCTGAATCAATTACTGAG	Cfa.10044.1.A1_at	CTGCTCCTGTTCCTATAAAGTAGAA
AF176592.CDS1.S1_s_at	TCAGATGGCCTGTCATTAATCTCAG	Cfa.10044.1.A1_at	GCCGCACTCTTCACTTGAGAGGCAG
AF176592.CDS1.S1_s_at	AAGGCTCCCTGCAAATATGAAGTAC	Cfa.10044.1.A1_at	TGAGAGGCAGATTGGCATCCCTCCG
AF176592.CDS1.S1_s_at	GGGTCAACAAATGTGGTCCAGAACT	Cfa.10044.1.A1_at	ACCATCATGTCTGTTCACTGTGTAC
AF176592.CDS1.S1_s_at	GTGGTCCAGAACTACATTGATAACA	Cfa.10044.1.A1_at	CACTGTGTACAGATGGCAGGCAGAA
AF176592.CDS1.S1_s_at	AAACAACTGCAAGAGACTGACGTAA	Cfa.10044.1.A1_at	AAAATAGTACCCACGACCAGTCAGC
AF176592.CDS1.S1_s_at	AAGGCAGGCCAGAGACAACAAAGTT	Cfa.10044.1.A1_at	GTCAGCCCCAAACTAGTGCACAATG
AF176592.CDS1.S1_s_at	GACAGCAAGCATGTTGCTCTACATA	Cfa.10044.1.A1_at	GAAAGGATTGCTACTGTATCAGAAT
AF176592.CDS1.S1_s_at	AAATGAGCAAAACCCCTGCATCCTT	Cfa.10044.1.A1_at	CTGTGTTTCTATTCAGTCTGTCCTG
AF176592.CDS1.S1_s_at	ATAATTATTGGTCCTGGCCTGACAG	Cfa.10044.1.A1_at	GTCTGTCCTGGGTATGTTACCACCA
AF243438.CDS29.S1_s_at	GATCCAAGGGTGCATTCGACTGACA	Cfa.10044.1.A1_at	TGTTACCACCAATGAAGAGAGCCTT
AF243438.CDS29.S1_s_at	TGACAGACAGCCCAACGTCGTATGA	Cfa.10070.1.A1_at	GCCCACTGCGCACTGTAGAACAGGA
AF243438.CDS29.S1_s_at	TTGTTGAACGTACACAGCCACCTGA	Cfa.10070.1.A1_at	AGGAAAACTCCTAATCTCGGATTTG
AF243438.CDS29.S1_s_at	CTGCATACCAATATCCATCGGAGTT	Cfa.10070.1.A1_at	CTAATCTCGGATTTGTGACATTGCA
AF243438.CDS29.S1_s_at	GTGGTCTTTCTCTAAACGCAGGTTC	Cfa.10070.1.A1_at	GTGACATTGCAACTCCTTTCTGAGA
AF243438.CDS29.S1_s_at	GAGTTTACTGGCAATATGTCCCGCT	Cfa.10070.1.A1_at	ATACGGCTTTTCTCATAGACCACAT
AF243438.CDS29.S1_s_at	CATACATGTCTCTGTCGAGGACCAT	Cfa.10070.1.A1_at	GGAGGAACTCACTCGAAACTTTCAG
AF243438.CDS29.S1_s_at	AAGCCCGTCAAAGGGATCTCTTGGT	Cfa.10070.1.A1_at	TCGAAACTTTCAGCCGAGGGACTTC
AF243438.CDS29.S1_s_at	CTCGGTTGCGTTCTATTCATGGACA	Cfa.10070.1.A1_at	GATGCTCACCATAGTTAGATTTCTG
AF243438.CDS29.S1_s_at	CATGGTTAACTCTGTCCGACTGATA	Cfa.10070.1.A1_at	GCAAGACACATGTTACTTTTGAAAG
AF243438.CDS29.S1_s_at	GCATTTGGTCTGTTTGCCCGAAATA	Cfa.10070.1.A1_at	AGAGCATACCTCTGAACTCTGCTTT
AF243438.CDS55.S1_s_at	TGTCATTGCTACTATAATCCCAGAG	Cfa.10070.1.A1_at	GAACTCTGCTTTTACGTAATTTATA
AF243438.CDS55.S1_s_at	AGAGCGCAGAACTTCCAGGGTTAGT	AFFX-CreX-5_at	GCCAGGCGTTTTCTGAGCATACCTG
AF243438.CDS55.S1_s_at	CTAGCACTATCGTATCCCAATTTAT	AFFX-CreX-5_at	GCGGCATGGTGCAAGTTGAATAACC
AF243438.CDS55.S1_s_at	AGGTACGCCCTCTTAATCATATATT	AFFX-CreX-5_at	GAAGATGTTCGCGATTATCTTCTAT
AF243438.CDS55.S1_s_at	TACGGATTTACATCGCGAGCCTACA	AFFX-CreX-5_at	TCTATATCTTCAGGCGCGCGGTCTG
AF243438.CDS55.S1_s_at	AAACGATGTTTGCACGATACGGATT	AFFX-CreX-5_at	GCAACATTTGGGCCAGCTAAACATG
AF243438.CDS55.S1_s_at	GCAACTGACGACGATGTTCCTAGGT	AFFX-CreX-5_at	CCAGCTAAACATGCTTCATCGTCGG
AF243438.CDS55.S1_s_at	GTTCCTAGGTGTATCAGACCTCTAT	AFFX-CreX-5_at	CCGGGCTGCCACGACCAAGTGACAG
AF243438.CDS55.S1_s_at	GGGAAAACTCTTACCATTCTGAAGG	AFFX-CreX-5_at	GACCAAGTGACAGCAATGCTGTTTC
AF243438.CDS55.S1_s_at	AAGGTTTTGATCTTCATATTCGCAA	AFFX-CreX-5_at	AATGCTGTTTCACTGGTTATGCGGC
AF243438.CDS55.S1_s_at	GATGTTTCCAACTACACGGATACTA	AFFX-CreX-5_at	ATGCCGGTGAACGTGCAAAACAGGC
AF059724.CDS1.S1_at	TCAGGTGCCCGTCTTGAAATCAGGA	AFFX-CreX-5_at	ACGTGCAAAACAGGCTCTAGCGTTC
AF059724.CDS1.S1_at	GAGGGTGACCAAACGCTACTGTCTG	AFFX-CreX-5_at	ATTTGCCTGCATTACCGGTCGATGC
AF059724.CDS1.S1_at	ATCGCGTATAAGTTTGTGCTCCCTT	AFFX-CreX-5_at	CTCTAGCGTTCGAACGCACTGATTT
AF059724.CDS1.S1_at	TAGATGGTCGTCCTCAGATTGTCCT	AFFX-CreX-5_at	TCGTTCACTCATGGAAAATAGCGAT
AF059724.CDS1.S1_at	ACCAGCTTGCTGAACTCGATTGATG	AFFX-CreX-5_at	ATGGAAAATAGCGATCGCTGCCAGG
AF059724.CDS1.S1_at	AAAGGATGACTCGTGATGCTGCTGA	AFFX-CreX-5_at	TACCGGTCGATGCAACGAGTGATGA
AF059724.CDS1.S1_at	ATGCTAGCGATGATGGCGGCCCAAT	AFFX-CreX-5_at	TCAGGGTTAAAGATATCTCACGTAC
AF059724.CDS1.S1_at	TAATGCTCACGTTACATCCTTCGGA	AFFX-CreX-5_at	GAGTGATGAGGTTCGCAAGAACCTG
AF059724.CDS1.S1_at	GTCGGCGTTCGTTACTATTGATCGT	AFFX-CreX-5_at	GCAAGAACCTGATGGACATGTTCAG
AF059724.CDS1.S1_at	GTGAACTGATGGAACTGGCCCTTCT	AFFX-CreX-5_at	GACATGTTCAGGGATCGCCAGGCGT
AF059724.CDS1.S1_at	TAAGTGGTCGCTGATACGTCGTTCC	AFFX-Cfa-r2-Bs-lys-3_at	ATACGGCCGGTTTTGTGTTAGCAGC
AFFX-r2-TagJ-5_at	GTGACGCAGCTCTTAGCGCAATGTA	AFFX-Cfa-r2-Bs-lys-3_at	GCCGGTTTTGTGTTAGCAGCGGAAA
AFFX-r2-TagJ-5_at	ATGATAGGCTAGTCTCGCGCAGTAC	AFFX-Cfa-r2-Bs-lys-3_at	GTGTTAGCAGCGGAAAAAATCTTCA
AFFX-r2-TagJ-5_at	AACGCTATGGCGTGCTAGTCGTCTC	AFFX-Cfa-r2-Bs-lys-3_at	GATTCATATTCATTTGTATCCAAGG
AFFX-r2-TagJ-5_at	GCTAGTCGTCTCATATACGTCTGAT	AFFX-Cfa-r2-Bs-lys-3_at	ATTTGTATCCAAGGTGCTGAATCTT
AFFX-r2-TagJ-5_at	ACGTCTGATGACCTCGTATCATGTT	AFFX-Cfa-r2-Bs-lys-3_at	ATCTTGGAGGAGGTTTCGGTATTCG
AFFX-r2-TagJ-5_at	AGGGCTGCGAACTGTCGATGATGGT	AFFX-Cfa-r2-Bs-lys-3_at	GATGATGAACCGCTTCATGCCACTG
AFFX-r2-TagJ-5_at	CGATGATGGTCACGACTCTGTCGAT	AFFX-Cfa-r2-Bs-lys-3_at	GCTTCATGCCACTGAATACGTTGAA
AFFX-r2-TagJ-5_at	GCAGCCTATATGATACGCAGTCGCA	AFFX-Cfa-r2-Bs-lys-3_at	GCTGTGAAAGAAAATGCTTCCCGTT
AFFX-r2-TagJ-5_at	TCGCATCCTATCTTACGTGTCAGTA	AFFX-Cfa-r2-Bs-lys-3_at	ATGCTTCCCGTTACGGTTTTGACAT
AFFX-r2-TagJ-5_at	GCCTAGTACGCTGACGGCATTCAGA	AFFX-Cfa-r2-Bs-lys-3_at	GACATTCCGGAAATTTGGATCGAAC
AFFX-r2-TagJ-5_at	AGAGTACGCTGATCGGCTTATGACG	Cfa.10047.1.A1_at	GAAATCATCCAATTTGTAGCTAGCC
AF004857.CDS3.S1_s_at	CCGCGAGTCATGGTCTATCTTTTTC	Cfa.10047.1.A1_at	TTGTAGCTAGCCTGAGGTCTCAAAA
AF004857.CDS3.S1_s_at	GTCGCTGACGGCGTGGTTTCATTAG	Cfa.10047.1.A1_at	TTGACTTGCATTTGTTTATAAACCC
AF004857.CDS3.S1_s_at	GTTTCATTAGACATGGACCCCTACT	Cfa.10047.1.A1_at	AAGACCCACTTTGATCCAGATCTAG
AF004857.CDS3.S1_s_at	GTTTCTTTAACATCATACTCGGCGG	Cfa.10047.1.A1_at	CAGATTCATTCTTTTACACCTTAAT
AF004857.CDS3.S1_s_at	GGCGGAGGCTCAACTAATGCAATTT	Cfa.10047.1.A1_at	TATGCTCAGGACAGAATCACATTTC
AF004857.CDS3.S1_s_at	GATTATATGATGTCGTCCACGGGAA	Cfa.10047.1.A1_at	ACATTTCCTTCCCTCAGGGTGGATT
AF004857.CDS3.S1_s_at	ACGGGAAATCTCACGGTCACTAGTA	Cfa.10047.1.A1_at	GGGTGGATTTTATTTGTTCTCTGAT
AF004857.CDS3.S1_s_at	GTGACATAACGCATATCCCATCAGA	Cfa.10047.1.A1_at	AAGTGAGGTCTTTCATGTCCATTGA
AF004857.CDS3.S1_s_at	TGTGGACGTATCATTCACCCGCGAT	Cfa.10047.1.A1_at	GCATATTTCATTGTCCTAGCCTAGA
AF004857.CDS3.S1_s_at	GATTCTGCGACTCATGCGTACCAAG	Cfa.10047.1.A1_at	CCTAGCCTAGATATTGAGACCATTA
AF004857.CDS3.S1_s_at	ATTACTTTCCCAACCGGAGGTGATG	Cfa.10073.1.A1_at	ATGTGGGACAGCAGAATTTCAGGAA
AF243438.CDS58.S1_s_at	ATATCTTGTCTGGTTGCCTGGAAGC	Cfa.10073.1.A1_at	GAACTTGGAGTTTGATACTTCGAGA
AF243438.CDS58.S1_s_at	GACGGTATATCATCATCCCCGTTTA	Cfa.10073.1.A1_at	TACTTCGAGAGTTCCTAGATATCTT
AF243438.CDS58.S1_s_at	ATGTGTCCCCTCTGAGATTACTGTA	Cfa.10073.1.A1_at	ATCCAAGGTTCATCCCTGAACTACA
AF243438.CDS58.S1_s_at	TCGATCGCCATAGAAATCTCCTCAG	Cfa.10073.1.A1_at	ATAGACCCACACTAACTACACATGA
AF243438.CDS58.S1_s_at	TCAGCCGCATTCCAGTATGGGACAA	Cfa.10073.1.A1_at	GAAACCAAGTCACTGTACATTCTAG
AF243438.CDS58.S1_s_at	TATACGTGCAGACTCATAGGCTACC	Cfa.10073.1.A1_at	GACCTATTAGTAATTTACCTGCCTG
AF243438.CDS58.S1_s_at	ATAGGCTACCCCTTCGATGAAGATA	Cfa.10073.1.A1_at	GAATTGCCCCTGTGAAATCTCTATA
AF243438.CDS58.S1_s_at	GAATATTACGATGCAACTCCAGCTG	Cfa.10073.1.A1_at	AACAGAATCCTGAGTCTCTACAGTG
AF243438.CDS58.S1_s_at	GCTGCAAGAGGAACACCCATGGTTA	Cfa.10073.1.A1_at	GAGTCTCTACAGTGCATCATCGACA
AF243438.CDS58.S1_s_at	GGGATAATCATGACTGCCCTATGTT	Cfa.10073.1.A1_at	AAATCTCTATACATCTTTGCCCTGA
AF243438.CDS58.S1_s_at	GAGGAGCTACGTTGGTTTCTACAAT	Cfa.10083.1.S1_at	TGACTCCATTCCTAAAATTGCCAAG
AFFX-r2-TagIN-M_at	TTATCGGGCCTGCTACATCAGTGGC	Cfa.10083.1.S1_at	AGTGCTGATTCAATTGGGCCATTTA
AFFX-r2-TagIN-M_at	GTGGCGATGTTCGTAACCCTTAGCC	Cfa.10083.1.S1_at	GGGCCATTTATTTACCAGTTTGCAG
AFFX-r2-TagIN-M_at	CTTAGCCGATCTTCTTACTTACGAG	Cfa.10083.1.S1_at	ACCAGTTTGCAGCTTTTAGGAAGAA
AFFX-r2-TagIN-M_at	GGCTCAGTGGTCCGACATAGTGCCC	Cfa.10083.1.S1_at	GGGAGACATCTAGTTTTGACTTAGG
AFFX-r2-TagIN-M_at	GAGCCGATGGTCAGCAATAGCGCCT	Cfa.10083.1.S1_at	CAAGCAGCCCTCTTTATGCATTTTT
AFFX-r2-TagIN-M_at	CACTATGCCACCTCTGGTCTAATAT	Cfa.10083.1.S1_at	GCCCTCTTTATGCATTTTTGCTCAG
AFFX-r2-TagIN-M_at	TATAGCGCCCTGTGGTCGTATAATC	Cfa.10083.1.S1_at	TGGAGTGCTTTTGTATAGGCCATCT
AFFX-r2-TagIN-M_at	ACTTCTCGGTATGTGTCCTCAATTA	Cfa.10083.1.S1_at	ATAGGCCATCTGTACATAAAAGTGT
AFFX-r2-TagIN-M_at	TCGCGGCTCACTAATTGTCTGCGGT	Cfa.10083.1.S1_at	TTAATTTCCCCATTTGTATCATATT
AFFX-r2-TagIN-M_at	GATCCAGATCGCAGGGTATCGCATC	Cfa.10083.1.S1_at	AGCTTTGTACAGTGTTTTAAGTTCT
AFFX-r2-TagIN-M_at	TCGTCGTGACGAACGTGCTACTCGC	Cfa.10012.1.A1_at	TTTCACATTTGTGCGTTGGGCTTCT
AFFX-r2-Ec-bioC-5_at	GTAAATACACCCACGTACTGGACGC	Cfa.10012.1.A1_at	ATTGAGTCCTAGAACCTAGTGGTTC
AFFX-r2-Ec-bioC-5_at	ACGCGGGTTGTGGACCTGGCTGGAT	Cfa.10012.1.A1_at	GCCCAGAGCCAGCATACTGGTACTT
AFFX-r2-Ec-bioC-5_at	CGCCGCCAATGCTTGTTCAGGCACG	Cfa.10012.1.A1_at	TGGTACTTCATTCAGATCCCCAAGT
AFFX-r2-Ec-bioC-5_at	CCAGAAGGATGCCGCAGACCATTAT	Cfa.10012.1.A1_at	GAATAGCGTTAGACTCTGGCTGCCC
AFFX-r2-Ec-bioC-5_at	AGGATGCCGCAGACCATTATCTGGC	Cfa.10012.1.A1_at	AAACCCTGTATTTCATTCTCTACTC
AFFX-r2-Ec-bioC-5_at	CTGCCGTTAGCGACTGCGACGTTCG	Cfa.10012.1.A1_at	TTCATTCTCTACTCATCAGTTACGA
AFFX-r2-Ec-bioC-5_at	ACGTTCGATCTTGCATGGAGCAATC	Cfa.10012.1.A1_at	AGTTACGAACTTCACTGCCAGTGGC
AFFX-r2-Ec-bioC-5_at	GCATGGAGCAATCTCGCAGTGCAGT	Cfa.10012.1.A1_at	GCCAGTGGCCTGATGATTTAAGTTT
AFFX-r2-Ec-bioC-5_at	ATGGAGCAATCTCGCAGTGCAGTGG	Cfa.10012.1.A1_at	GCCCTTACTGAAGGTCTGGCCTTGA
AFFX-r2-Ec-bioC-5_at	CACGGCACTCCGCGAGCTGTATCGG	Cfa.10012.1.A1_at	TGGCCTTGACTCTGTAGCCTAAAGT
AFFX-r2-Ec-bioC-5_at	ATGCAGATCTACAGCGCCAGAGTGC	AFFX-Cfa-r2-Bs-dap-M_at	GAAAATTGCTTTGATCGCGCATGAC
AF243438.CDS9.S1_s_at	TCGTGTTCTGCTTCGAATTCCATCA	AFFX-Cfa-r2-Bs-dap-M_at	ATGGTTCAATTTACGACTGCCTATC
AF243438.CDS9.S1_s_at	CAAATCGCGGTTGTGGGTCATGAGT	AFFX-Cfa-r2-Bs-dap-M_at	GAATCATGATCTATACGCAACCGGA
AF243438.CDS9.S1_s_at	GCCATCTGTGATGCCGAGAGGGTCA	AFFX-Cfa-r2-Bs-dap-M_at	AAATCGGTGCACTGATCGCTGCCAA
AF243438.CDS9.S1_s_at	GCCGAGAGGGTCAAACTATGTTATA	AFFX-Cfa-r2-Bs-dap-M_at	GCCAATGCACTCGATCTTGTCATTT
AF243438.CDS9.S1_s_at	GGTTACACCACCGATCAGGCGAAGA	AFFX-Cfa-r2-Bs-dap-M_at	GGATGTCTCGGCATTAATCCGTTTA
AF243438.CDS9.S1_s_at	GGACGAGACGTTGCCGTTCGATCCA	AFFX-Cfa-r2-Bs-dap-M_at	ATGTGATGTGTATTCCATTCCGCTC
AF243438.CDS9.S1_s_at	TTTGTGATCTCTTATCCTATACCGC	AFFX-Cfa-r2-Bs-dap-M_at	ATTCCGCTCGCCACAAATATGGGTA
AF243438.CDS9.S1_s_at	GACGAGAGCAAGTCGCACCGCCACT	AFFX-Cfa-r2-Bs-dap-M_at	GGAAATTCTTGTGCGCACACTTGAT
AF243438.CDS9.S1_s_at	GCCACTCGAGGCCACAAGAAATTAC	AFFX-Cfa-r2-Bs-dap-M_at	TGAAGGTGTTTTCGAATTCCGTGAC
AF243438.CDS9.S1_s_at	ATTACGATTCTTATACGGGTGGGCG	AFFX-Cfa-r2-Bs-dap-M_at	TAATGCTGACGTTCTTGCTTTTGGC
AF243438.CDS9.S1_s_at	CGCCTACTCGAACTATCACGTGATG	AFFX-Cfa-r2-Ec-bioB-5_at	AGCATTTCGATCCTCGTCAGGTGCA
AFFX-BioDn-5_at	AGGTTTACGCAATAGCGACGCGCTG	AFFX-Cfa-r2-Ec-bioB-5_at	GATCCTCGTCAGGTGCAGGTCAGCA
AFFX-BioDn-5_at	CGCAATAGCGACGCGCTGGCGTTAC	AFFX-Cfa-r2-Ec-bioB-5_at	CAGGTCAGCACGTTGCTGTCGATTA
AFFX-BioDn-5_at	GCGACGCGCTGGCGTTACAGCGCAA	AFFX-Cfa-r2-Ec-bioB-5_at	TTGCTGTCGATTAAGACCGGAGCTT
AFFX-BioDn-5_at	GCGCTGGCGTTACAGCGCAACAGCA	AFFX-Cfa-r2-Ec-bioB-5_at	GGAGCTTGTCCGGAAGATTGCAAAT
AFFX-BioDn-5_at	CGTTACAGCGCAACAGCAGCCTGCA	AFFX-Cfa-r2-Ec-bioB-5_at	ATTGCAAATACTGCCCGCAAACGTC
AFFX-BioDn-5_at	AGCGCAACAGCAGCCTGCAGCTGGA	AFFX-Cfa-r2-Ec-bioB-5_at	GTCGCGCTACAAAACCGGGCTGGAA
AFFX-BioDn-5_at	CAGCAGCCTGCAGCTGGATTACGCA	AFFX-Cfa-r2-Ec-bioB-5_at	GCGGCAGGATCGACGCGCTTCTGTA
AFFX-BioDn-5_at	CTGCAGCTGGATTACGCAACAGTAA	AFFX-Cfa-r2-Ec-bioB-5_at	GCTGGATCTGCTGTTTGAAGCGCAG
AFFX-BioDn-5_at	CATCAGCGCGCAAGAGGGCAGACCG	AFFX-Cfa-r2-Ec-bioB-5_at	TTGAAGCGCAGCAGGTGCATCGCCA
AFFX-BioDn-5_at	CGCAAGAGGGCAGACCGATAGAATC	AFFX-Cfa-r2-Ec-bioB-5_at	AGGTGCATCGCCAGCATTTCGATCC
AFFX-BioDn-5_at	GGGCAGACCGATAGAATCATTGGTA	Cfa.10025.1.A1_s_at	AGGGTACAGCCAAAGACCGGAGCTT
AFFX-BioDn-5_at	GACCGATAGAATCATTGGTAATGAG	Cfa.10025.1.A1_s_at	GAAGTTCAAACAGTGCCCTACAGAG
AFFX-BioDn-5_at	AGAATCATTGGTAATGAGCGCCGGA	Cfa.10025.1.A1_s_at	GAACATGGCTCGAGAACACTTCAAA
AFFX-BioDn-5_at	TTGGTAATGAGCGCCGGATTACGCG	Cfa.10025.1.A1_s_at	GGGCTGAACACTACTGGGACCTTGC
AFFX-BioDn-5_at	ATGAGCGCCGGATTACGCGCGCTTG	Cfa.10025.1.A1_s_at	GGGACCTTGCGCTGAGTGAATCTGT
AFFX-BioDn-5_at	GGGAAAACTGTCGCCAGTTGTGCAC	Cfa.10025.1.A1_s_at	AATCTGTGTTGGAGTCTACCGACTG
AFFX-BioDn-5_at	CGCCAGTTGTGCACTTTTACAAGCC	Cfa.10025.1.A1_s_at	GACTGAGACTACTGTGAGCCCTTGC
AFFX-BioDn-5_at	CACTTTTACAAGCCGCAAAGGCAGC	Cfa.10025.1.A1_s_at	TTGTCTCTTCAGTCCTCTTATTCTA
AFFX-BioDn-5_at	CAAGCCGCAAAGGCAGCAGGCTACC	Cfa.10025.1.A1_s_at	AGCCCAGTCCCACTTGTGTGTGTGA
AFFX-BioDn-5_at	GCAAAGGCAGCAGGCTACCGGACGG	Cfa.10025.1.A1_s_at	GTGTGTGTGATCTCAGAACTGTGCC
AF243438.CDS97.S1_s_at	TCTGCTAGTTCATTTCAGGCCCATA	Cfa.10025.1.A1_s_at	CCTTTATTCCCCTTATGTGCATATG
AF243438.CDS97.S1_s_at	AAATGTATTCGCTATGTCGACCGTA	AFFX-r2-Ec-bioB-M_at	TGTATGACGCTGGGCACGTTGAGTG
AF243438.CDS97.S1_s_at	ATGTCGACCGTATGGCCTTTGAAAA	AFFX-r2-Ec-bioB-M_at	GCTGGGCACGTTGAGTGAATCTCAG
AF243438.CDS97.S1_s_at	GACAGTGACTCGGAATTGCATGCAA	AFFX-r2-Ec-bioB-M_at	CACGCACTTATCAGGAACGCCTCGA
AF243438.CDS97.S1_s_at	TAACGACTCCATTTTACGATAATTC	AFFX-r2-Ec-bioB-M_at	TGCCGGGATCAAAGTCTGTTCTGGC
AF243438.CDS97.S1_s_at	AACAATTCCCATGTCGATGCAATGA	AFFX-r2-Ec-bioB-M_at	CCGGGATCAAAGTCTGTTCTGGCGG
AF243438.CDS97.S1_s_at	AGGCTTATTTACTTTTCTACGATGA	AFFX-r2-Ec-bioB-M_at	CGGGATCAAAGTCTGTTCTGGCGGC
AF243438.CDS97.S1_s_at	ATTTGGTCTGTGAAAGGTGCCGCTC	AFFX-r2-Ec-bioB-M_at	GCATTGTGGGCTTAGGCGAAACGGT
AF243438.CDS97.S1_s_at	GCTCTCCCCATCGTAGGATATACAT	AFFX-r2-Ec-bioB-M_at	AAAAGATCGCGCCGGATTATTGCTG
AF243438.CDS97.S1_s_at	AACCAAGATCTGATGAGGCCCCACT	AFFX-r2-Ec-bioB-M_at	AGATCGCGCCGGATTATTGCTGCAA
AF243438.CDS97.S1_s_at	AGGAAACTCCTTCAGATGTTATTGA	AFFX-r2-Ec-bioB-M_at	CCGGATTATTGCTGCAACTGGCAAA
AF243438.CDS23.S1_s_at	GTCCTAGCCGTCTTTACAGTGTTAA	AFFX-r2-Ec-bioB-M_at	CGGAAAGCGTGCCAATCAACATGCT
AF243438.CDS23.S1_s_at	ATGGTAGTTCGTCTTATTCGGGCCA	AFFX-TrpnX-3_at	TTAACATTTGTCAATGAACATGGGG
AF243438.CDS23.S1_s_at	CGGGCCAGTTTATATCATCGTCGAC	AFFX-TrpnX-3_at	GCGAGCTGTACTTATCGGTGAATCA
AF243438.CDS23.S1_s_at	GACGATCTACGCGAGCATATGCCAA	AFFX-TrpnX-3_at	ATGAGACAAACTTCTCAGCGTAAAG
AF243438.CDS23.S1_s_at	AATCCGAGGATGAACGTGCACTTAC	AFFX-TrpnX-3_at	TCTCAGCGTAAAGCAATCCATGCTT
AF243438.CDS23.S1_s_at	AATCCCGTTCTGCTGAAGCATCGGA	AFFX-TrpnX-3_at	GTCACTAAAGGATTTGCAGCTTGCG
AF243438.CDS23.S1_s_at	ATAATTTTGATCATGTCGTCGCTAA	AFFX-TrpnX-3_at	TTTGCAGCTTGCGGCGGAATCACAG
AF243438.CDS23.S1_s_at	GTCGCTAATGTTCGGAATGCTCTTA	AFFX-TrpnX-3_at	GCGGCGGAATCACAGGCTGATTACC
AF243438.CDS23.S1_s_at	GACTTCCGTTTTAACCCTGATATAT	AFFX-TrpnX-3_at	ATCAATAGAGACGATGTCACGTATT
AF243438.CDS23.S1_s_at	GTCATCGAGTTCTTAATCGCACGGT	AFFX-TrpnX-3_at	ACGATGTCACGTATTGCCAAGAGCT
AF243438.CDS23.S1_s_at	TATTGCATGTCATAGCGTCCTAGCC	AFFX-TrpnX-3_at	GTATTGCCAAGAGCTTGAAGCTCGA
AF243438.CDS99.S1_at	GGGAGAATTTACCATGTAGCATTGC	AFFX-TrpnX-3_at	GAGCTTGAAGCTCGACGTCATTCAG
AF243438.CDS99.S1_at	GAATTTACCATGTAGCATTGCGGTA	AFFX-TrpnX-3_at	CTCGACGTCATTCAGCTTCACGGTG
AF243438.CDS99.S1_at	ACCATGTAGCATTGCGGTAGATACT	AFFX-TrpnX-3_at	TTCAGCTTCACGGTGATGAAAAACC
AF243438.CDS99.S1_at	GTAGCATTGCGGTAGATACTATAAA	AFFX-TrpnX-3_at	GGATGCTGCTGCTCTTCGCAAGCTG
AF243438.CDS99.S1_at	GCGGTAGATACTATAAAAAGCAGAC	AFFX-TrpnX-3_at	AGCTGACAGGCTGTGAAATATGGAA
AF243438.CDS99.S1_at	AAAAGCAGACACCATGGATCCTTGC	AFFX-TrpnX-3_at	GCGCTTCACCATCAAGATAACACAA
AF243438.CDS99.S1_at	AAGCAGACACCATGGATCCTTGCTC	AFFX-TrpnX-3_at	ATGTTGACGGCTTTGTGATTGATTC
AF243438.CDS99.S1_at	AGACACCATGGATCCTTGCTCACAT	AFFX-TrpnX-3_at	TTGATTCATCTGTAAAAGGGTCTAG
AF243438.CDS99.S1_at	ACCATGGATCCTTGCTCACATTCTT	AFFX-TrpnX-3_at	TGGGAATGTGTGCCGGAATATCAGC
AF243438.CDS99.S1_at	ATGGATCCTTGCTCACATTCTTCTC	AFFX-TrpnX-3_at	TGCCGGAATATCAGCAGGCGGCTAT
AF243438.CDS99.S1_at	TCACATTCTTCTCCCATTATCATTG	AFFX-r2-TagH_at	GTCAGGCAATGTGTCCGAACGGCGA
AFFX-r2-Bs-thr-5_s_at	GTAACAGATCAAACACCGGCGCTAA	AFFX-r2-TagH_at	ACGTCGCCTCACGGAGTAATCGCGT
AFFX-r2-Bs-thr-5_s_at	GTCAACAGGTAACACTTCCGCTGCT	AFFX-r2-TagH_at	TAGTGCCGTCGGTTCAGGTCATATG
AFFX-r2-Bs-thr-5_s_at	GCATATGCAGCCCGTGCTAACATGA	AFFX-r2-TagH_at	TCGGACCTAAACCGTAGCTCTCGGC
AFFX-r2-Bs-thr-5_s_at	GAAATGCATTGTCATCATCCCGAAC	AFFX-r2-TagH_at	AGATCGTCCTCGTCTCGAATATAGC
AFFX-r2-Bs-thr-5_s_at	AACTCGCTCAAGCTGTCATGTACGG	AFFX-r2-TagH_at	GTCACCGCTATCTCGTAAGGGGTCC
AFFX-r2-Bs-thr-5_s_at	GACGGAAACTTTGACGATGCGCTTA	AFFX-r2-TagH_at	TTGGATGGTGCAGCTTACTTCGCGT
AFFX-r2-Bs-thr-5_s_at	GATGCGCTTAAAATTGTCCGTTCCA	AFFX-r2-TagH_at	AGTCCTCTGCATCTATAATCGCGTA
AFFX-r2-Bs-thr-5_s_at	GTCAACCCTTACCGCATTGAAGGCC	AFFX-r2-TagH_at	TCTAAGCGCTCGATATTCCACCTAA
AFFX-r2-Bs-thr-5_s_at	AAACTGCTGCCTTCGAAGTGTGCGA	AFFX-r2-TagH_at	TGGCAGCCGAATGGACTATCGCTCC
AFFX-r2-Bs-thr-5_s_at	AGCGCCTGATGTTTTAGCGATCCCG	AFFX-r2-TagH_at	TATCGCCATGTCTGTCAACTGTACT
AFFX-r2-Bs-thr-5_s_at	CAGGCCTTCCGAAAATGCGCGGCTT	AFFX-r2-Bs-phe-3_at	GACCATCCCGAGCTGAATATCGGGG
AF243438.CDS26.S1_s_at	ACGACGTTCGACACCATTGACTAGT	AFFX-r2-Bs-phe-3_at	ATCGGGGTCATTGCCAATGATATGG
AF243438.CDS26.S1_s_at	CGCATTGGGCCAATCGCTTATGGAA	AFFX-r2-Bs-phe-3_at	CTGTCTCCCGATGAAAACATATCTT
AF243438.CDS26.S1_s_at	TGGAAGTGATTCTAGCAGCCGGTAT	AFFX-r2-Bs-phe-3_at	GAGCTCTAGGCCCAAAACGACCTTA
AF243438.CDS26.S1_s_at	ACACCGATTCGGGATTTCCAGTAAT	AFFX-r2-Bs-phe-3_at	ATGGTCATGCTGCCGCAGGATGATC
AF243438.CDS26.S1_s_at	GCTCTACCAGCATCTATTTCCAATG	AFFX-r2-Bs-phe-3_at	TCCGGGGCGCTGCATAGAGTGCTGT
AF243438.CDS26.S1_s_at	GATTCGTCTGCAATTGCACAGCTCG	AFFX-r2-Bs-phe-3_at	GTCTGCATTTTCTTGGAGAAATTTA
AF243438.CDS26.S1_s_at	TCGCGCCACAGAGCCGAGTTTGATA	AFFX-r2-Bs-phe-3_at	CCTGTCAAAAATTGAGTCACGTCCG
AF243438.CDS26.S1_s_at	TATTTGGAAGCGTATGACATCACAC	AFFX-r2-Bs-phe-3_at	CTGTCAAAAATTGAGTCACGTCCGA
AF243438.CDS26.S1_s_at	AAACAACCTGTTGGAGCTTGCGGCT	AFFX-r2-Bs-phe-3_at	TCAAAAATTGAGTCACGTCCGACTA
AF243438.CDS26.S1_s_at	TTGCGGCTCTCTATTGTCACGCAAA	AFFX-r2-Bs-phe-3_at	GAGTCACGTCCGACTAAAACCGGAT
AF243438.CDS26.S1_s_at	TTGTCACGCAAACCCAGTAGCAAGA	Cfa.10080.1.A1_at	GGACCTGCAGTCCAATCAATTATAA
AFFX-Gga-r2-Ec-bioB-5_at	AGCATTTCGATCCTCGTCAGGTGCA	Cfa.10080.1.A1_at	CATAAAATTTTTCTTGCCTCTCAAT
AFFX-Gga-r2-Ec-bioB-5_at	GATCCTCGTCAGGTGCAGGTCAGCA	Cfa.10080.1.A1_at	TGAAACACGTTGCTCTTTAAGATTG
AFFX-Gga-r2-Ec-bioB-5_at	CAGGTCAGCACGTTGCTGTCGATTA	Cfa.10080.1.A1_at	TAAATCAGTCCCAGCATTTTGAGAT
AFFX-Gga-r2-Ec-bioB-5_at	CTGTCGATTAAGACCGGAGCTTGTC	Cfa.10080.1.A1_at	AAAATTACTGTATTCACTGGTCCTG
AFFX-Gga-r2-Ec-bioB-5_at	GGAGCTTGTCCGGAAGATTGCAAAT	Cfa.10080.1.A1_at	ACTGGTCCTGAAGACAGACTGGTTA
AFFX-Gga-r2-Ec-bioB-5_at	ATTGCAAATACTGCCCGCAAACGTC	Cfa.10080.1.A1_at	GTGTGGTGTGTTAAGGTCTAGCCTA
AFFX-Gga-r2-Ec-bioB-5_at	AACGTCGCGCTACAAAACCGGGCTG	Cfa.10080.1.A1_at	GGTCTAGCCTAAGAAGCCTCAGCCA
AFFX-Gga-r2-Ec-bioB-5_at	CCGAGCGGTTGATGGAAGTTGAACA	Cfa.10080.1.A1_at	GAAGCCTCAGCCAAATTTTGATCCT
AFFX-Gga-r2-Ec-bioB-5_at	GCGGCAGGATCGACGCGCTTCTGTA	Cfa.10080.1.A1_at	GATCCTAACTTGAGATGCCTTAAGC
AFFX-Gga-r2-Ec-bioB-5_at	CTGTTTGAAGCGCAGCAGGTGCATC	Cfa.10080.1.A1_at	GCCTTAAGCTTATTAATGCGGCCAT
AFFX-Gga-r2-Ec-bioB-5_at	CAGGTGCATCGCCAGCATTTCGATC	AFFX-r2-P1-cre-5_at	GATCGCCAGGCGTTTTCTGAGCATA
AF243438.CDS3.S1_s_at	GAAAGTCACTAATCGGCCTACTGGC	AFFX-r2-P1-cre-5_at	TCTGTCCGTTTGCCGGTCGTGGGCG
AF243438.CDS3.S1_s_at	GGCCTATTATCGCTGTTGACGTGAT	AFFX-r2-P1-cre-5_at	CGGAAATGGTTTCCCGCAGAACCTG
AF243438.CDS3.S1_s_at	CAGGCGTTGTTGCTAGTATTGGTTC	AFFX-r2-P1-cre-5_at	GATGTTCGCGATTATCTTCTATATC
AF243438.CDS3.S1_s_at	CTGTTGACGTGATACCACCGGGTAT	AFFX-r2-P1-cre-5_at	TTGGGCCAGCTAAACATGCTTCATC
AF243438.CDS3.S1_s_at	ACCGGGTATACACTGCAGGAGGACT	AFFX-r2-P1-cre-5_at	GCTGTTTCACTGGTTATGCGGCGGA
AF243438.CDS3.S1_s_at	GGACTGAAATTATCTTTGCTCTCAA	AFFX-r2-P1-cre-5_at	GCCGGTGAACGTGCAAAACAGGCTC
AF243438.CDS3.S1_s_at	AGGCGCCTTGGGTACAGCAGTTTAT	AFFX-r2-P1-cre-5_at	GCAAAACAGGCTCTAGCGTTCGAAC
AF243438.CDS3.S1_s_at	CCTACTATTGGTTCCCATATCTGTC	AFFX-r2-P1-cre-5_at	GCACTGATTTCGACCAGGTTCGTTC
AF243438.CDS3.S1_s_at	GTACAGATCTATTTGTTGCCTGGAA	AFFX-r2-P1-cre-5_at	ATCGCTGCCAGGATATACGTAATCT
AF243438.CDS3.S1_s_at	TGGCATATCACTGGAGAGTCTCGCT	AFFX-r2-P1-cre-5_at	GGGATTGCTTATAACACCCTGTTAC
AF243438.CDS3.S1_s_at	AGTCTCGCTGTCGACAAGAGGTGCA	AFFX-Cf_G-6-PDH_3_at	GGGGTAATTCTGCTTCTTCTATGTT
AF243438.CDS65.S1_s_at	AGATGGCTTCCAAATTCCTGGCTAA	AFFX-Cf_G-6-PDH_3_at	CTATGTTTCTACTATGTATTCAGTG
AF243438.CDS65.S1_s_at	GTAGATCACGAATCGGCCACGCTAA	AFFX-Cf_G-6-PDH_3_at	TGGGTCAGAGCATTCAGATATAGTC
AF243438.CDS65.S1_s_at	AGTAGGTAAATGTCGTCGCCCTGGC	AFFX-Cf_G-6-PDH_3_at	TCCTTGTCAGCCTAGCTCAGCTTTC
AF243438.CDS65.S1_s_at	CAGCGAGAGACAGTTTTCCGGGTTT	AFFX-Cf_G-6-PDH_3_at	GCCTAGCTCAGCTTTCCCTAGAACT
AF243438.CDS65.S1_s_at	AAGATTTTCCGACTGCCGAAGACGA	AFFX-Cf_G-6-PDH_3_at	GAACTTTCCACTGCTCTACATCGTG
AF243438.CDS65.S1_s_at	GTACGTTTCTATACATCTGGTCAAT	AFFX-Cf_G-6-PDH_3_at	CAGCTCTAGGGTAGTGCTTTTGTAT
AF243438.CDS65.S1_s_at	TGGTCAATTTGCAACTCTCATTCCT	AFFX-Cf_G-6-PDH_3_at	GCTTTTGTATGGTTTAGTCAAGCTC
AF243438.CDS65.S1_s_at	GAGACCTTTACTCCTAAACGAACAG	AFFX-Cf_G-6-PDH_3_at	GCTCTGAAATCTTGGGCAAAAAGGT
AF243438.CDS65.S1_s_at	GGGCATTATCGTCTACAACTATCAT	AFFX-Cf_G-6-PDH_3_at	AGGAAAGGATTCCTCTCTCCAGAAG
AF243438.CDS65.S1_s_at	TGGACGACTCTGTAATACCTTGCAT	AFFX-Cf_G-6-PDH_3_at	CAATGTTACTTTTGATTCCTAGAGG
AF243438.CDS65.S1_s_at	TACCTTGCATATTTGGACGCTCATC	AFFX-Cf_G-6-PDH_3_at	ATTCCTAGAGGGTAAATATGACTCC
AF243438.CDS91.S1_s_at	ATGTTGCGCTATTGCCTAAATCTGT	AFFX-Cf_G-6-PDH_3_at	CTATCCCAAGCCAACCAAGAGTGCT
AF243438.CDS91.S1_s_at	AATCTGTACGCAGTCTAGCCAGGAC	AFFX-Cf_G-6-PDH_3_at	GGAAAAGCCAGCTCTTCCTTGCCTG
AF243438.CDS91.S1_s_at	TACGATCTCCCAGGCTGCTATGAAA	AFFX-Cf_G-6-PDH_3_at	CAGCTGATTTGCAGAATATGTCTTT
AF243438.CDS91.S1_s_at	ATGATATTTCTGCTTCGCCATTCCA	AFFX-Cf_G-6-PDH_3_at	AACCATCGTGGTCATAACATCTTTG
AF243438.CDS91.S1_s_at	CGGTGTATTGAACGTGCTCCTCTTA	AFFX-r2-Bs-lys-3_at	ATACGGCCGGTTTTGTGTTAGCAGC
AF243438.CDS91.S1_s_at	TGGACACTCGGTTTACTATCATGAT	AFFX-r2-Bs-lys-3_at	GGCCGGTTTTGTGTTAGCAGCGGAA
AF243438.CDS91.S1_s_at	GATACTGTACTGTTTCGCGCTTATA	AFFX-r2-Bs-lys-3_at	GTTTTGTGTTAGCAGCGGAAAAAAT
AF243438.CDS91.S1_s_at	GAATAAGTCCACTCCCCGAAATAGA	AFFX-r2-Bs-lys-3_at	TATTCATTTGTATCCAAGGTGCTGA
AF243438.CDS91.S1_s_at	TTGGAAACCTTTATGTCGTGCCGTC	AFFX-r2-Bs-lys-3_at	TTCATTTGTATCCAAGGTGCTGAAT
AF243438.CDS91.S1_s_at	GCAACTCCGGGTAGATTCTCCAAAA	AFFX-r2-Bs-lys-3_at	TTGTATCCAAGGTGCTGAATCTTGG
AF243438.CDS91.S1_s_at	TTATGATATACTTTCTGCCGGCGGG	AFFX-r2-Bs-lys-3_at	GTGCTGAATCTTGGAGGAGGTTTCG
AFFX-Gga-r2-Bs-thr-M_s_at	TGAAATCCTTCACGCATATCAGCTG	AFFX-r2-Bs-lys-3_at	TCATGCCACTGAATACGTTGAAAAA
AFFX-Gga-r2-Bs-thr-M_s_at	ATATCAGCTGATCGCCCGTGTAGAA	AFFX-r2-Bs-lys-3_at	ATGCCACTGAATACGTTGAAAAAAT
AFFX-Gga-r2-Bs-thr-M_s_at	AGAACCAGGTTCTTGCGCGTCTATC	AFFX-r2-Bs-lys-3_at	GAACCGGGCCGTTCTCTCGTGGGAG
AFFX-Gga-r2-Bs-thr-M_s_at	GAACACAGCGGTCGACATTTCAGAA	AFFX-r2-Bs-lys-3_at	CGGGCCGTTCTCTCGTGGGAGACGC
AFFX-Gga-r2-Bs-thr-M_s_at	GAAATCAAGCCTGTCACATTGCCGA	AFFX-Cfa-gapdh-5_x_at	GACAGACAGCCGCGTCTTCTGCTGC
AFFX-Gga-r2-Bs-thr-M_s_at	GGCCCGTGTATGAACGAAGCCGACA	AFFX-Cfa-gapdh-5_x_at	ACAGACAGCCGCGTCTTCTGCTGCA
AFFX-Gga-r2-Bs-thr-M_s_at	GAAGCCGACATGCTGTTCTCTGTCA	AFFX-Cfa-gapdh-5_x_at	CAGACAGCCGCGTCTTCTGCTGCAG
AFFX-Gga-r2-Bs-thr-M_s_at	ATTCAGTCGGAATGGCGCTCAGCAG	AFFX-Cfa-gapdh-5_x_at	AGACAGCCGCGTCTTCTGCTGCAGC
AFFX-Gga-r2-Bs-thr-M_s_at	GAAGCTGACCGTCTTTGAAAGCGAC	AFFX-Cfa-gapdh-5_x_at	GACAGCCGCGTCTTCTGCTGCAGCC
AFFX-Gga-r2-Bs-thr-M_s_at	GATAACCTGATCTACCAAGTGGCTA	AFFX-Cfa-gapdh-5_x_at	GCGTCTTCTGCTGCAGCCCCAGGCG
AFFX-Gga-r2-Bs-thr-M_s_at	AAAGAAATGCCTCCTGTCCATGTGA	AFFX-Cfa-gapdh-5_x_at	GTCTTCTGCTGCAGCCCCAGGCGCG
AFFX-BioB-5_at	GCATCGCCAGCATTTCGATCCTCGT	AFFX-Cfa-gapdh-5_x_at	GGCGCGTCCCCGAGGCACGATGGTG
AFFX-BioB-5_at	GCATTTCGATCCTCGTCAGGTGCAG	AFFX-Cfa-gapdh-5_x_at	GCGTCCCCGAGGCACGATGGTGAAG
AFFX-BioB-5_at	CGATCCTCGTCAGGTGCAGGTCAGC	AFFX-Cfa-gapdh-5_x_at	CGTCCCCGAGGCACGATGGTGAAGG
AFFX-BioB-5_at	TCGTCAGGTGCAGGTCAGCACGTTG	AFFX-Cfa-gapdh-5_x_at	CCCCGAGGCACGATGGTGAAGGTCG
AFFX-BioB-5_at	GCAGGTCAGCACGTTGCTGTCGATT	Cfa.10057.1.A1_at	TCATCCCTCATTTAATTCTCCTAAC
AFFX-BioB-5_at	CAGCACGTTGCTGTCGATTAAGACC	Cfa.10057.1.A1_at	GGTATTATCACTCTTTTCAGATGTC
AFFX-BioB-5_at	GCTGTCGATTAAGACCGGAGCTTGT	Cfa.10057.1.A1_at	CCTGGCCAGGGTCACAAGTTTGTTA
AFFX-BioB-5_at	AGCTTGTCCGGAAGATTGCAAATAC	Cfa.10057.1.A1_at	TTTCCACAATTCTTTCCCTGAGATC
AFFX-BioB-5_at	AGATTGCAAATACTGCCCGCAAACG	Cfa.10057.1.A1_at	AACGCTTTGGGAGTCCTTAGCTCAG
AFFX-BioB-5_at	CAAATACTGCCCGCAAACGTCGCGC	Cfa.10057.1.A1_at	GGATGGTGCATCTAGCCAAGTGCAA
AFFX-BioB-5_at	TGAACAGGTGCTGGAGTCGGCGCGC	Cfa.10057.1.A1_at	GAAGTTCTGAAATGCATGGTCACAT
AFFX-BioB-5_at	GGAGTCGGCGCGCAAAGCGAAAGCG	Cfa.10057.1.A1_at	ACATGTGGGCTGATGCCTTTTGCAA
AFFX-BioB-5_at	CAAAGCGAAAGCGGCAGGATCGACG	Cfa.10057.1.A1_at	AACCCCTGTTCATAATTAAGTGTCG
AFFX-BioB-5_at	GGCAGGATCGACGCGCTTCTGTATG	Cfa.10057.1.A1_at	GCCCAGGTCTTGTTCAGGGACTTTA
AFFX-BioB-5_at	GACATTGTCGCAAGTCACAGAATTA	Cfa.10057.1.A1_at	GGGACTTTAGACTTTGTGGCAAACA
AFFX-BioB-5_at	ATTGTCGCAAGTCACAGAATTATTT	AFFX-Cf_AdrenRecpt_3_at	AAACTGATGACTTGGCCTTGGGGTG
AFFX-BioB-5_at	GTTGCTGGATCTGCTGTTTGAAGCG	AFFX-Cf_AdrenRecpt_3_at	GAGGGGCAACCCTTACCAAGTGAGT
AFFX-BioB-5_at	GGATCTGCTGTTTGAAGCGCAGCAG	AFFX-Cf_AdrenRecpt_3_at	GTGAGTTTTCACCATCCTCTTGTCT
AFFX-BioB-5_at	GCGCAGCAGGTGCATCGCCAGCATT	AFFX-Cf_AdrenRecpt_3_at	CTCTTGTCTCTCTCTTCCTGAGAAG
AFFX-BioB-5_at	GCAGGTGCATCGCCAGCATTTCGAT	AFFX-Cf_AdrenRecpt_3_at	TCTTCCTGAGAAGAGTTTTCTAAAC
AFFX-r2-TagD_at	TTCGTGACTAGCAGGCCTTATTCCG	AFFX-Cf_AdrenRecpt_3_at	TTTACCACTACCTCAGCAGCTGAAG
AFFX-r2-TagD_at	GCCTTATTCCGGTGCTATGAGTATC	AFFX-Cf_AdrenRecpt_3_at	GAAGTACCCAGCAGCCTGCTCTCAG
AFFX-r2-TagD_at	ACTAGCCTGCCGGTCAATAACTGAT	AFFX-Cf_AdrenRecpt_3_at	CTCGGAGTCCCCATTAGCTTTGGTG
AFFX-r2-TagD_at	GAGTCGGGTACTACATTCGTGCGAT	AFFX-Cf_AdrenRecpt_3_at	CGTGCTTAGGGCAAAGAGGTCTCTC
AFFX-r2-TagD_at	GTCTATGAGGTCTCGTCTTCGTGAG	AFFX-Cf_AdrenRecpt_3_at	GCAAAGAGGTCTCTCCTCCTTCTAT
AFFX-r2-TagD_at	ATGCCGCATATTCGGAACGTCGCCT	AFFX-Cf_AdrenRecpt_3_at	CCTTCTATTCTTTCTGCTGCCTGTG
AFFX-r2-TagD_at	AATTATCGGAACTCGTCGCTTATTT	AFFX-Cf_AdrenRecpt_3_at	ACTGAGTGTCCTTCAGGCTCGGTGG
AFFX-r2-TagD_at	ACCTTGGGAGCCGTTCCTAAAGCTG	AFFX-Cf_AdrenRecpt_3_at	GCAAGGCTGGGAGCAGAAAGCTATA
AFFX-r2-TagD_at	ACGCGGAGTCAACCTGATAACCCAT	AFFX-Cf_AdrenRecpt_3_at	GTTTGGGGTTCTGTCCCTGACTCCA
AFFX-r2-TagD_at	GGAACAGTCTAACCTACGCGAGATA	AFFX-Cf_AdrenRecpt_3_at	GGTTCTGTCCCTGACTCCATCACTA
AFFX-r2-TagD_at	ACGCGAGATACGTCTTACCGCACAT	AFFX-Cf_AdrenRecpt_3_at	CCCCCTTTGGATACAGGACAGCTCT
AF243438.CDS68.S1_s_at	GTTTGGGCGTGCCTATTTGCCTTAG	AFFX-BioB-5_at	GCATCGCCAGCATTTCGATCCTCGT
AF243438.CDS68.S1_s_at	GTATACCAAAAATTATGCCGCCCGA	AFFX-BioB-5_at	GCATTTCGATCCTCGTCAGGTGCAG
AF243438.CDS68.S1_s_at	GCCGCCCGAGTGATATCTAGTGTTT	AFFX-BioB-5_at	CGATCCTCGTCAGGTGCAGGTCAGC
AF243438.CDS68.S1_s_at	ATTTTTGTTTCATCACCCTATCGCA	AFFX-BioB-5_at	TCGTCAGGTGCAGGTCAGCACGTTG
AF243438.CDS68.S1_s_at	ACCCTATCGCAGCAGTTCTTATTAT	AFFX-BioB-5_at	GCAGGTCAGCACGTTGCTGTCGATT
AF243438.CDS68.S1_s_at	TGTCTTTGTCTAGCGACACTATCGA	AFFX-BioB-5_at	CAGCACGTTGCTGTCGATTAAGACC
AF243438.CDS68.S1_s_at	ATTGAGCTTGTTATTGGCTCCCGGC	AFFX-BioB-5_at	GCTGTCGATTAAGACCGGAGCTTGT
AF243438.CDS68.S1_s_at	GATGAATGTGCCTTGGAAACTTCCC	AFFX-BioB-5_at	AGCTTGTCCGGAAGATTGCAAATAC
AF243438.CDS68.S1_s_at	GAAACTTCCCCATCTGGCGTACATG	AFFX-BioB-5_at	AGATTGCAAATACTGCCCGCAAACG
AF243438.CDS68.S1_s_at	GGCGTACATGTTTTTTGCTCCAATT	AFFX-BioB-5_at	CAAATACTGCCCGCAAACGTCGCGC
AF243438.CDS68.S1_s_at	AATTGTTGCGCCTCTTTAATATCTA	AFFX-BioB-5_at	TGAACAGGTGCTGGAGTCGGCGCGC
AF243438.CDS6.S1_s_at	GAACATCAAGTTTTGGTGATCGCAT	AFFX-BioB-5_at	GGAGTCGGCGCGCAAAGCGAAAGCG
AF243438.CDS6.S1_s_at	GGTGATCGCATCAGAAGTTTTTGTG	AFFX-BioB-5_at	CAAAGCGAAAGCGGCAGGATCGACG
AF243438.CDS6.S1_s_at	AGTTTTTGTGAGAGGGCTCGCTCCT	AFFX-BioB-5_at	GGCAGGATCGACGCGCTTCTGTATG
AF243438.CDS6.S1_s_at	TCGCTCCTTAATTTCCAACTTTGTA	AFFX-BioB-5_at	GACATTGTCGCAAGTCACAGAATTA
AF243438.CDS6.S1_s_at	TTCCAACTTTGTAACATGGCGTAGT	AFFX-BioB-5_at	ATTGTCGCAAGTCACAGAATTATTT
AF243438.CDS6.S1_s_at	AAACGAGAGCTGTGAGGTTCTGGCA	AFFX-BioB-5_at	GTTGCTGGATCTGCTGTTTGAAGCG
AF243438.CDS6.S1_s_at	AGGTTCTGGCAGAGATTCCACAAGA	AFFX-BioB-5_at	GGATCTGCTGTTTGAAGCGCAGCAG
AF243438.CDS6.S1_s_at	GAAAGAAGTGGAATCGACCCTCTGA	AFFX-BioB-5_at	GCGCAGCAGGTGCATCGCCAGCATT
AF243438.CDS6.S1_s_at	GGATGCATTGACTGCGGACCCACTT	AFFX-BioB-5_at	GCAGGTGCATCGCCAGCATTTCGAT
AF243438.CDS6.S1_s_at	CCACTTTCCATCTCGAAACGGATAC	AFFX-r2-TagQ-5_at	GAGCGTATTTGCTGTCAGAACCTCA
AF243438.CDS6.S1_s_at	AACGGATACTGCGACAACTAGGAAC	AFFX-r2-TagQ-5_at	TCAGAACCTCAGCTCATCATGTATG
AF243438.CDS94.S1_s_at	GCAGTACGCGATTCAGTTACGACAT	AFFX-r2-TagQ-5_at	GTATGATGCTGTACCATCCTGCGAT
AF243438.CDS94.S1_s_at	GTTACGACATCCATATGCAATCCCT	AFFX-r2-TagQ-5_at	GCACCGCTATAATGCGAGGCTCTCC
AF243438.CDS94.S1_s_at	AGGAGTTTAGACCATCTGCCCAAGA	AFFX-r2-TagQ-5_at	AGCGAGTCGAATCCAATGCCGTAGC
AF243438.CDS94.S1_s_at	TAAAGAACCCGCTGACGCATTATAC	AFFX-r2-TagQ-5_at	GATAACGATGCCGCTGACTCTACGG
AF243438.CDS94.S1_s_at	TTATACACGATAACTGCCGCTCATA	AFFX-r2-TagQ-5_at	GACTCTACGGTAATGCACGATCCTC
AF243438.CDS94.S1_s_at	GGAACTCTGGAAACCAATTCGCCTG	AFFX-r2-TagQ-5_at	GCACGATCCTCTACATTGATAGCAG
AF243438.CDS94.S1_s_at	AATTCGCCTGAACTGCTTGCACTTG	AFFX-r2-TagQ-5_at	GGTGCAAGGCTCCTAGCATGTAGTC
AF243438.CDS94.S1_s_at	GCTTGCACTTGATCCATACTGTACA	AFFX-r2-TagQ-5_at	AGGTCTGCGACTGATCCTAGTGCAA
AF243438.CDS94.S1_s_at	GTAAACGGCTCAGGTTCTCAGCTGA	AFFX-r2-TagQ-5_at	TGCGTCTGAGCCTGAGCTACAGCGA
AF243438.CDS94.S1_s_at	ATTAGATGCCTGCAAGTCCATCCGT	AFFX-r2-Ec-bioC-5_at	GTAAATACACCCACGTACTGGACGC
AF243438.CDS94.S1_s_at	AGTCCATCCGTTGGAATTTCCACAG	AFFX-r2-Ec-bioC-5_at	ACGCGGGTTGTGGACCTGGCTGGAT
AF243438.CDS20.S1_s_at	TGATTCTCACGGCTATGGAGGACGT	AFFX-r2-Ec-bioC-5_at	CGCCGCCAATGCTTGTTCAGGCACG
AF243438.CDS20.S1_s_at	GCAGAACCTTTGGATTTTGCCCTTT	AFFX-r2-Ec-bioC-5_at	CCAGAAGGATGCCGCAGACCATTAT
AF243438.CDS20.S1_s_at	TTGTTTGCTCATCTCATATTTGGAA	AFFX-r2-Ec-bioC-5_at	AGGATGCCGCAGACCATTATCTGGC
AF243438.CDS20.S1_s_at	TGGAAAACCGGAACGTCAGCTCATC	AFFX-r2-Ec-bioC-5_at	CTGCCGTTAGCGACTGCGACGTTCG
AF243438.CDS20.S1_s_at	ATCCGACCCGTCACTATATGTTCAA	AFFX-r2-Ec-bioC-5_at	ACGTTCGATCTTGCATGGAGCAATC
AF243438.CDS20.S1_s_at	TGGTCGACAGTAACGCCGATGCGCA	AFFX-r2-Ec-bioC-5_at	GCATGGAGCAATCTCGCAGTGCAGT
AF243438.CDS20.S1_s_at	AAATACCCTAATGGAACTGAGTTCT	AFFX-r2-Ec-bioC-5_at	ATGGAGCAATCTCGCAGTGCAGTGG
AF243438.CDS20.S1_s_at	ACTGAGTTCTATTAGTCCATTCGAT	AFFX-r2-Ec-bioC-5_at	CACGGCACTCCGCGAGCTGTATCGG
AF243438.CDS20.S1_s_at	CGATAGTAATCATGTTCTTCCTCAC	AFFX-r2-Ec-bioC-5_at	ATGCAGATCTACAGCGCCAGAGTGC
AF243438.CDS20.S1_s_at	GTTCTTCCTCACTACATTATATACA	Cfa.10041.1.S1_s_at	CAGCTGCATCTAGAACGCCAGTGGA
AF243438.CDS20.S1_s_at	CAATTTAGGTGAGGCGTTCCAGGTA	Cfa.10041.1.S1_s_at	GAACGCCAGTGGAACATGTGGATCC
AFFX-Gga-TrpnX-5_at	AGAACGGTGTTGCATCGATACAGGC	Cfa.10041.1.S1_s_at	TTTGGAGATACTTGAGCTGAGACCT
AFFX-Gga-TrpnX-5_at	TGCTGATTCTGTTCCGGAAGCCGAA	Cfa.10041.1.S1_s_at	TGAGCTGAGACCTCAGCCATCTCAT
AFFX-Gga-TrpnX-5_at	AAAGCCGGTGCGCTGCTGAAAACGA	Cfa.10041.1.S1_s_at	CAGCCATCTCATCCTTGGATTTTTT
AFFX-Gga-TrpnX-5_at	AAAACCCTTACTGCCGGTGAGGCTG	Cfa.10041.1.S1_s_at	ACAGTGCAGCAATATCTATAATGAC
AFFX-Gga-TrpnX-5_at	GCAGCGGAAATGACTCCTTCTGAAA	Cfa.10041.1.S1_s_at	TAATGACTGAGAGGATCTGCCAAAA
AFFX-Gga-TrpnX-5_at	GATATTGTCAATTCTTGCTCATCGG	Cfa.10041.1.S1_s_at	GTGATTGAATATTGGACGAAGCATT
AFFX-Gga-TrpnX-5_at	GGCACACGCTCTTACAGTCGATGGA	Cfa.10041.1.S1_s_at	GAAGCATTATGGTCTTGTTTGGTGA
AFFX-Gga-TrpnX-5_at	GAGACGGTATTTCCACTTTTAATAT	Cfa.10041.1.S1_s_at	TGGTGAGACAGTATTAGCAGGATTT
AFFX-Gga-TrpnX-5_at	TTTTAATATCTCAACGGCCTCGGCA	Cfa.10041.1.S1_s_at	CTGTACTTTGTAATGTCAGTGTTTA
AFFX-Gga-TrpnX-5_at	GTTGCCTCGGCAGCTGGTGCGAAAA	AFFX-Cfa-actin-3_s_at	TTTTTTGGCGCTTGACTCAGGATTT
AFFX-Gga-TrpnX-5_at	GCAATCGCTCTGTCTCTTCTAAAAG	AFFX-Cfa-actin-3_s_at	GTGGGTTGGAGCGAGCATCCCCAAA
AF243438.CDS33.S1_s_at	GGGTCTGTATTGACACAACTATCTG	AFFX-Cfa-actin-3_s_at	AGCGAGCATCCCCAAAGTTCTACAA
AF243438.CDS33.S1_s_at	GGTATGTTGTACTCTTTGGTCTATC	AFFX-Cfa-actin-3_s_at	GTTCTACAATGTGGCCGAGGACTTT
AF243438.CDS33.S1_s_at	TGGTCTATCTACGTTTGTTCTTCGA	AFFX-Cfa-actin-3_s_at	GTGGCCGAGGACTTTGATTGTACAT
AF243438.CDS33.S1_s_at	GTTCTTCGACCTTCATGCTGTTTAA	AFFX-Cfa-actin-3_s_at	ATATCGTGAGATGCATTGTTACAGG
AF243438.CDS33.S1_s_at	ATACGCACAGGACAATCGGTTTTTA	AFFX-Cfa-actin-3_s_at	TACAGGAAGTCCTTTGCCTTCCCAA
AF243438.CDS33.S1_s_at	GGAGCGTTATCTATGCTAGGTCCAA	AFFX-Cfa-actin-3_s_at	AATCTTCGCCTTAATACTTGTTCTT
AF243438.CDS33.S1_s_at	TAGGTCCAATTATCTTCGTAGCAAT	AFFX-Cfa-actin-3_s_at	TTTTGAATGGTCTGCCATCACGGCC
AF243438.CDS33.S1_s_at	GATGATAGCTAGTCTCGCATATTCT	AFFX-Cfa-actin-3_s_at	GCCATCACGGCCCTTGTTTTTTGTC
AF243438.CDS33.S1_s_at	AGATGCAATTGGATTTCTCCTCCCT	AFFX-Cfa-actin-3_s_at	GGCTTACCTGTACACTGACTTGAGA
AF243438.CDS33.S1_s_at	TCCTCCCTCGGTTATGGACAAGAGC	AFFX-Cfa-r2-Ec-bioD-3_at	GACACTTTCACTTTTGCAGATTGGG
AF243438.CDS33.S1_s_at	GTACTTAAATCGTGTGTGCCATTCT	AFFX-Cfa-r2-Ec-bioD-3_at	TTGCAGATTGGGTAACACAGGAACA
AFFX-DapX-M_at	CATGTCAGGCGTTAAACTGTCAGTC	AFFX-Cfa-r2-Ec-bioD-3_at	AACAACTGCCGGTGATACTGGTAGT
AFFX-DapX-M_at	ATGAAGATTGATCAGCTTGTGTATG	AFFX-Cfa-r2-Ec-bioD-3_at	GTAGTTGGTGTGAAACTCGGCTGTA
AFFX-DapX-M_at	TGAAAATTGCTTTGATCGCGCATGA	AFFX-Cfa-r2-Ec-bioD-3_at	AACTCGGCTGTATTAATCACGCGAT
AFFX-DapX-M_at	AGGATATGGTTCAATTTACGACTGC	AFFX-Cfa-r2-Ec-bioD-3_at	ATCACGCGATGTTGACTGCACAGGT
AFFX-DapX-M_at	TCAATTTACGACTGCCTATCGGGAT	AFFX-Cfa-r2-Ec-bioD-3_at	GGTAATACAACACGCCGGACTGACT
AFFX-DapX-M_at	TCATGATCTATACGCAACCGGAACC	AFFX-Cfa-r2-Ec-bioD-3_at	GCGAACGATGTTACGCCTCCGGGAA
AFFX-DapX-M_at	TTCATGAGGCGACAGGTCTTCAAAT	AFFX-Cfa-r2-Ec-bioD-3_at	GCCTCCGGGAAAACGTCACGCTGAA
AFFX-DapX-M_at	AGCAAATCGGTGCACTGATCGCTGC	AFFX-Cfa-r2-Ec-bioD-3_at	CACGCTGAATATATGACCACGCTCA
AFFX-DapX-M_at	TGCACTGATCGCTGCCAATGCACTC	AFFX-Cfa-r2-Ec-bioD-3_at	TGCTGGGAGAGATCCCCTGGCTTGC
AFFX-DapX-M_at	GCTGCCAATGCACTCGATCTTGTCA	AFFX-Cf_P450-2E1_3_s_at	CCGTCTTGTTTGACAAACAAGAATT
AFFX-DapX-M_at	CCCGCTGACCGCGCAGCCGCATGAA	AFFX-Cf_P450-2E1_3_s_at	GACAAACAAGAATTCCCTGATCCAG
AFFX-DapX-M_at	GATGTCTCGGCATTAATCCGTTTAT	AFFX-Cf_P450-2E1_3_s_at	CACTTTCTGAATGAAAACGGAAAAT
AFFX-DapX-M_at	CATTAATCCGTTTATGTGATGTGTA	AFFX-Cf_P450-2E1_3_s_at	AATATAGTGACTACTTCAAGGCATT
AFFX-DapX-M_at	TGATGTGTATTCCATTCCGCTCGCC	AFFX-Cf_P450-2E1_3_s_at	GCATTCTCCGCAGGAAAGCGGGTGT
AFFX-DapX-M_at	GCTCGCCACAAATATGGGTACTGCG	AFFX-Cf_P450-2E1_3_s_at	ATTCTCCGCAGGAAAGCGGGTGTGT
AFFX-DapX-M_at	AAATTCTTGTGCGCACACTTGATGA	AFFX-Cf_P450-2E1_3_s_at	GAGCTCTTCCTGTTCTTGTCCGCCA
AFFX-DapX-M_at	GCGCACACTTGATGAAGGTGTTTTC	AFFX-Cf_P450-2E1_3_s_at	CACAATCGGGTTTGCCAAGATCCCC
AFFX-DapX-M_at	ATGCTGACGTTCTTGCTTTTGGCGC	AFFX-Cf_P450-2E1_3_s_at	CGGGCCCCAGGCTCTTTGGTGCAAA
AFFX-DapX-M_at	GCTTTTGGCGCCCACAGTGATGATG	AFFX-Cf_P450-2E1_3_s_at	GGAGTCTTCCTGCTTCCGCATATCC
AFFX-DapX-M_at	CACAGTGATGATGTCGAGATCGGAA	AFFX-Cf_P450-2E1_3_s_at	CGCATATCCCTTTAATGCCTCCAGG
AF243438.CDS36.S1_s_at	AGCTGGAATGATGCCTTCGAGATTG	AFFX-Cf_P450-2E1_3_s_at	TTTAATGCCTCCAGGAAGACCCTCC
AF243438.CDS36.S1_s_at	AGGAACCGCCAGGATGCAACTTGGT	AFFX-Cf_P450-2E1_3_s_at	AGGCACTCAGGGTTTCACAGGGAAT
AF243438.CDS36.S1_s_at	GCAACTTGGTGATTGTCGATCTACA	AFFX-Cf_P450-2E1_3_s_at	CTCAGGGTTTCACAGGGAATAAATT
AF243438.CDS36.S1_s_at	ACAGATCTACTAATGCTCAGGGCAC	AFFX-Cf_P450-2E1_3_s_at	GAATAAATTGGTCCTGAGATGCTGC
AF243438.CDS36.S1_s_at	AATCATATTTGTCCCTACAGTAAGG	AFFX-Cf_P450-2E1_3_s_at	GAAATTTGACAGCAACGTCCAAAAA
AF243438.CDS36.S1_s_at	GGTTTGATACATCTTTGGCCACAAC	Cfa.10022.1.A1_at	GAGTGATAGAACAAAGGCCCTCAGA
AF243438.CDS36.S1_s_at	GAACCTCGTACTGATTATCGCGGTA	Cfa.10022.1.A1_at	GGCCCTCAGAAAGATCTGTCCACAT
AF243438.CDS36.S1_s_at	TTATCGCGGTAGTAGGGTGTCATTA	Cfa.10022.1.A1_at	GAAAGATCTGTCCACATGAAGTTGC
AF243438.CDS36.S1_s_at	GTGTCATTACACCATACGCTTTTAG	Cfa.10022.1.A1_at	AAGTTGCTTGTCAGCTAAGATGGGC
AF243438.CDS36.S1_s_at	GGTAGCTTATCAACAACGCATGCAT	Cfa.10022.1.A1_at	AGATGGGCAGACAGGGCCACCATTC
AF243438.CDS36.S1_s_at	AATATTACTGGCCTGTCCACAACAA	Cfa.10022.1.A1_at	GTGACAACGAACTGAATGCTGGATT
AF243438.CDS62.S1_s_at	GAAGAGCCTGACATGCCGTTGATCT	Cfa.10022.1.A1_at	GAATGCTGGATTTTTGCTATCACAA
AF243438.CDS62.S1_s_at	GCTCCTCGGGCATCAGTATATTTAT	Cfa.10022.1.A1_at	TGCTATCACAACAGCCATGTAACTG
AF243438.CDS62.S1_s_at	GGAAGTATATTCTCTATCACACCCC	Cfa.10022.1.A1_at	GTAACTGTGAAGACATTCATGGGTA
AF243438.CDS62.S1_s_at	GAAATTCAATTTCCCCTGGTGATCC	Cfa.10022.1.A1_at	AAATGGTGTGACATCAGCCTGCTTC
AF243438.CDS62.S1_s_at	TATGTGCACTTATACCTTTCTACCA	Cfa.10022.1.A1_at	GAGGCCGCCCTCTCTGGAATTGGAT
AF243438.CDS62.S1_s_at	ATACCTTTCTACCACGCGGGATGTA	AFFX-r2-Bs-dap-M_at	TGAAGATTGATCAGCTTGTGTATGG
AF243438.CDS62.S1_s_at	GCGGGATGTATCACAGCGACTCGAA	AFFX-r2-Bs-dap-M_at	GAAAATTGCTTTGATCGCGCATGAC
AF243438.CDS62.S1_s_at	ACAGCGACTCGAAGCATCTCAAATG	AFFX-r2-Bs-dap-M_at	AAAGAATCATGATCTATACGCAACC
AF243438.CDS62.S1_s_at	AAGGGCGTGTTTTGACTGCTCCTGA	AFFX-r2-Bs-dap-M_at	GTCATTTTTTTGCGCGACCCGCTGA
AF243438.CDS62.S1_s_at	GAACTCCGGGCTCAGAATTATATAC	AFFX-r2-Bs-dap-M_at	TGAACCGGATGTCTCGGCATTAATC
AF243438.CDS62.S1_s_at	AGTTCGGTCTTCCTCTAATACGATG	AFFX-r2-Bs-dap-M_at	CCGTTTATGTGATGTGTATTCCATT
AFFX-Gga-r2-Ec-bioD-3_at	TTCACTTTTGCAGATTGGGTAACAC	AFFX-r2-Bs-dap-M_at	CTGCGGAAATTCTTGTGCGCACACT
AFFX-Gga-r2-Ec-bioD-3_at	GGGTAACACAGGAACAACTGCCGGT	AFFX-r2-Bs-dap-M_at	GCGGAAATTCTTGTGCGCACACTTG
AFFX-Gga-r2-Ec-bioD-3_at	AACAACTGCCGGTGATACTGGTAGT	AFFX-r2-Bs-dap-M_at	ATGAAGGTGTTTTCGAATTCCGTGA
AFFX-Gga-r2-Ec-bioD-3_at	GTAGTTGGTGTGAAACTCGGCTGTA	AFFX-r2-Bs-dap-M_at	CCGAATGTATAATGCTGACGTTCTT
AFFX-Gga-r2-Ec-bioD-3_at	GAAACTCGGCTGTATTAATCACGCG	AFFX-r2-Bs-dap-M_at	CCCACAGTGATGATGTCGAGATCGG
AFFX-Gga-r2-Ec-bioD-3_at	TTAATCACGCGATGTTGACTGCACA	AFFX-BioDn-5_at	AGGTTTACGCAATAGCGACGCGCTG
AFFX-Gga-r2-Ec-bioD-3_at	GGTAATACAACACGCCGGACTGACT	AFFX-BioDn-5_at	CGCAATAGCGACGCGCTGGCGTTAC
AFFX-Gga-r2-Ec-bioD-3_at	GCGAACGATGTTACGCCTCCGGGAA	AFFX-BioDn-5_at	GCGACGCGCTGGCGTTACAGCGCAA
AFFX-Gga-r2-Ec-bioD-3_at	GCCTCCGGGAAAACGTCACGCTGAA	AFFX-BioDn-5_at	GCGCTGGCGTTACAGCGCAACAGCA
AFFX-Gga-r2-Ec-bioD-3_at	GCTGAATATATGACCACGCTCACCC	AFFX-BioDn-5_at	CGTTACAGCGCAACAGCAGCCTGCA
AFFX-Gga-r2-Ec-bioD-3_at	TGCTGGGAGAGATCCCCTGGCTTGC	AFFX-BioDn-5_at	AGCGCAACAGCAGCCTGCAGCTGGA
AF176590.CDS1.S1_s_at	AATACAGAGCTATTTGCCGCAGCAG	AFFX-BioDn-5_at	CAGCAGCCTGCAGCTGGATTACGCA
AF176590.CDS1.S1_s_at	AATTTCTCATCTCTTGGTCTGACAG	AFFX-BioDn-5_at	CTGCAGCTGGATTACGCAACAGTAA
AF176590.CDS1.S1_s_at	AGGTTCCCAAGGATTGACATCCCCA	AFFX-BioDn-5_at	CATCAGCGCGCAAGAGGGCAGACCG
AF176590.CDS1.S1_s_at	ACATCCCCAAAATTGCGAGGTCCTT	AFFX-BioDn-5_at	CGCAAGAGGGCAGACCGATAGAATC
AF176590.CDS1.S1_s_at	GCGAGGTCCTTTTATGATCTGTTTG	AFFX-BioDn-5_at	GGGCAGACCGATAGAATCATTGGTA
AF176590.CDS1.S1_s_at	GAGTATGGCAAAGCCCTTGGGTCTT	AFFX-BioDn-5_at	GACCGATAGAATCATTGGTAATGAG
AF176590.CDS1.S1_s_at	GGGTAATTGCCAGATCATCCAACAA	AFFX-BioDn-5_at	AGAATCATTGGTAATGAGCGCCGGA
AF176590.CDS1.S1_s_at	ATAATGTTGGGCCATGTCTCCGTAC	AFFX-BioDn-5_at	TTGGTAATGAGCGCCGGATTACGCG
AF176590.CDS1.S1_s_at	GGTCTTCTTCACCTGAGGCAAAACC	AFFX-BioDn-5_at	ATGAGCGCCGGATTACGCGCGCTTG
AF176590.CDS1.S1_s_at	CCCTAAGGCAGGGTTGTTGTCACTT	AFFX-BioDn-5_at	GGGAAAACTGTCGCCAGTTGTGCAC
AF176590.CDS1.S1_s_at	TTGTCACTTGCCAATTGTCCCAATT	AFFX-BioDn-5_at	CGCCAGTTGTGCACTTTTACAAGCC
AF243438.CDS49.S1_s_at	GCAACTCAATGCCATACCGAATGAT	AFFX-BioDn-5_at	CACTTTTACAAGCCGCAAAGGCAGC
AF243438.CDS49.S1_s_at	ATGTCTCGTGCATCATCCCAACAGG	AFFX-BioDn-5_at	CAAGCCGCAAAGGCAGCAGGCTACC
AF243438.CDS49.S1_s_at	GGATTTGCTGAAGTACGCCGACATA	AFFX-BioDn-5_at	GCAAAGGCAGCAGGCTACCGGACGG
AF243438.CDS49.S1_s_at	GATAATCGGACCTTGCAACGTTCGA	Cfa.10051.1.A1_at	GATTCTGCTAGTCCTTGTTTCTTGA
AF243438.CDS49.S1_s_at	CAACGTTCGACCATGTTTGCAGTCA	Cfa.10051.1.A1_at	AAGGCTGGCTTCAACTTTTCTTTCA
AF243438.CDS49.S1_s_at	GGATACGACCATCCATTGGCTTGAA	Cfa.10051.1.A1_at	TTTACTGACCGATGGAACATGTGCC
AF243438.CDS49.S1_s_at	TGAAACGCACATTCCCAACGGGTAT	Cfa.10051.1.A1_at	TGGTCAACTTTCCACCCAGTAAATC
AF243438.CDS49.S1_s_at	CAACGGGTATCTTTTCGACTACTAT	Cfa.10051.1.A1_at	CAGGCACCCAAACCTTGGTGTTTTG
AF243438.CDS49.S1_s_at	TACTATACATGGATCGCCGTCAGAT	Cfa.10051.1.A1_at	TTGGCCCTCTCTATCTGTATATATG
AF243438.CDS49.S1_s_at	AACCTTTGATCCCTCTGATTTGAGC	Cfa.10051.1.A1_at	AAGCGGAGTTCTGGCTGTCACCACA
AF243438.CDS49.S1_s_at	GTGCTACATCATTACCCTTTAGTGG	Cfa.10051.1.A1_at	TCACCACACAGCCATGAGACTTTGT
AF262571.CDS1.S1_s_at	AACTTTGTACACAGCCTCTCAGAAT	Cfa.10051.1.A1_at	AGTAGAGCCTCCCTATCAAGAGCTG
AF262571.CDS1.S1_s_at	GAATGGCCCAATACTGAAGGTCAAT	Cfa.10051.1.A1_at	AGAGCTGCTGCTGTCAATTTTCATG
AF262571.CDS1.S1_s_at	GAAACCTTATGGTATGGTCTCAAAG	Cfa.10051.1.A1_at	TTCCCTTGGCTATTTGATTCTGCTA
AF262571.CDS1.S1_s_at	GTCAACTCAGCCAAAGCAGTCGGGA	AFFX-DapX-M_at	CATGTCAGGCGTTAAACTGTCAGTC
AF262571.CDS1.S1_s_at	ACGATTTGATTGCTCTCTGTGACTT	AFFX-DapX-M_at	ATGAAGATTGATCAGCTTGTGTATG
AF262571.CDS1.S1_s_at	TCTGTGACTTCCTTGACCTAGAGAA	AFFX-DapX-M_at	TGAAAATTGCTTTGATCGCGCATGA
AF262571.CDS1.S1_s_at	AAGCTAGGATTGCTCCATACGCTGG	AFFX-DapX-M_at	AGGATATGGTTCAATTTACGACTGC
AF262571.CDS1.S1_s_at	CCATACGCTGGCTTGATCATGATAA	AFFX-DapX-M_at	TCAATTTACGACTGCCTATCGGGAT
AF262571.CDS1.S1_s_at	GGGATCTTCAAAAAACTGGGTGCAG	AFFX-DapX-M_at	TCATGATCTATACGCAACCGGAACC
AF262571.CDS1.S1_s_at	CTGGAGCCACCAGGGTACGAGATAT	AFFX-DapX-M_at	TTCATGAGGCGACAGGTCTTCAAAT
AF262571.CDS1.S1_s_at	GGTACGAGATATGTCCTGAAGTCAA	AFFX-DapX-M_at	AGCAAATCGGTGCACTGATCGCTGC
AF243438.CDS30.S1_s_at	CTCCTAATTATATTCGTGCCACTCT	AFFX-DapX-M_at	TGCACTGATCGCTGCCAATGCACTC
AF243438.CDS30.S1_s_at	ACGGGTGCGTTAATATCCGCCGCAA	AFFX-DapX-M_at	GCTGCCAATGCACTCGATCTTGTCA
AF243438.CDS30.S1_s_at	GCCGCAATCTCATATATGGCCGGAT	AFFX-DapX-M_at	CCCGCTGACCGCGCAGCCGCATGAA
AF243438.CDS30.S1_s_at	ACCAGGTCTTGTACTCTTCGATTAT	AFFX-DapX-M_at	GATGTCTCGGCATTAATCCGTTTAT
AF243438.CDS30.S1_s_at	GAATGGTTTGTACCACACGCCACAT	AFFX-DapX-M_at	CATTAATCCGTTTATGTGATGTGTA
AF243438.CDS30.S1_s_at	ACGCCACATGCGAGAAGTTTCTTCC	AFFX-DapX-M_at	TGATGTGTATTCCATTCCGCTCGCC
AF243438.CDS30.S1_s_at	ACATCGCTATTGTATTGCCTGCGGG	AFFX-DapX-M_at	GCTCGCCACAAATATGGGTACTGCG
AF243438.CDS30.S1_s_at	TGTTGACTGCCCACACGGAATTTAA	AFFX-DapX-M_at	AAATTCTTGTGCGCACACTTGATGA
AF243438.CDS30.S1_s_at	GAATTGAAGCAGTTCTCTCACGTCT	AFFX-DapX-M_at	GCGCACACTTGATGAAGGTGTTTTC
AF243438.CDS30.S1_s_at	GTCTCTGTCGCACCAACAAGATGCA	AFFX-DapX-M_at	ATGCTGACGTTCTTGCTTTTGGCGC
AF243438.CDS30.S1_s_at	GATGCAACAGGTGCTACGACCTTAC	AFFX-DapX-M_at	GCTTTTGGCGCCCACAGTGATGATG
AFFX-PheX-5_at	GACATTTTATCTTGTCCGTGAAGAT	AFFX-DapX-M_at	CACAGTGATGATGTCGAGATCGGAA
AFFX-PheX-5_at	ATCTTGTCCGTGAAGATGTATTGCC	AFFX-r2-TagIN-5_at	GGTCAATGTCAGTACGGATCGCGTC
AFFX-PheX-5_at	AAGATGTATTGCCCGATGCAATGAG	AFFX-r2-TagIN-5_at	GTCGATCTAGGTGACTACGCACGCC
AFFX-PheX-5_at	GTATTGCCCGATGCAATGAGAAAAA	AFFX-r2-TagIN-5_at	GTGCTCCGTGCGAAATACGCGGTCA
AFFX-PheX-5_at	AGCAGATTCAGTAGCAGATGCCGTT	AFFX-r2-TagIN-5_at	TATAATGGCGTCTGTCGTGCTCATA
AFFX-PheX-5_at	CAGTAGCAGATGCCGTTCAAAAGGT	AFFX-r2-TagIN-5_at	TGCTAGACGTGTCCATCGAGCTGCA
AFFX-PheX-5_at	TACAGGGATGCTGTTTTTCCATTCT	AFFX-r2-TagIN-5_at	GCTGCATAGCTATACTTCGAGTCAC
AFFX-PheX-5_at	GGAGGATAGGTCAGGTGCGTTATCT	AFFX-r2-TagIN-5_at	TGAATAGTGTCGTAGGCTCTCGGGC
AFFX-PheX-5_at	TAGGTCAGGTGCGTTATCTCAGCTT	AFFX-r2-TagIN-5_at	GCACGTTGTTAAACTGTTGCCGCCA
AFFX-PheX-5_at	GCGTTATCTCAGCTTCTTCAGGCGG	AFFX-r2-TagIN-5_at	GTCAGTTGCCACTCGTTGATAGTCA
AFFX-PheX-5_at	CTCAGCTTCTTCAGGCGGTAGCTGA	AFFX-r2-TagIN-5_at	AGACTCGTCCCTCGATATCAATACT
AFFX-PheX-5_at	TCTTCAGGCGGTAGCTGATTCTGGA	AFFX-r2-TagIN-5_at	TATCAATACTCGTCCGCAGGTGAAC
AFFX-PheX-5_at	GGCGGTAGCTGATTCTGGAAGCAAC	Cfa.1009.1.A1_at	GAATGTGGCCACTTATTTCAGTATC
AFFX-PheX-5_at	CTGATTCTGGAAGCAACGTTCTTTC	Cfa.1009.1.A1_at	GCCACTTATTTCAGTATCTTCTCCA
AFFX-PheX-5_at	TCTTTCCATTCACCAGACCATTCCG	Cfa.1009.1.A1_at	GCAAGTCTACAGATCCTTTTTCCAT
AFFX-PheX-5_at	ACCAGACCATTCCGCTTCAAGGCAG	Cfa.1009.1.A1_at	AGATCCTTTTTCCATCATTTTACAG
AFFX-PheX-5_at	CCATTCCGCTTCAAGGCAGAGCAAA	Cfa.1009.1.A1_at	TACAGTGACCTTTTCTTCATTTTGG
AFFX-PheX-5_at	CGCTTCAAGGCAGAGCAAATGTGAC	Cfa.1009.1.A1_at	GTCATTGACTCTTGCGTGTCAATTT
AFFX-PheX-5_at	GCAAATGTGACACTGTCTATCAGTA	Cfa.1009.1.A1_at	GTGTCAATTTCCCTCAGGTTCTATT
AFFX-PheX-5_at	CACTGTCTATCAGTACGTCGGCAAT	Cfa.1009.1.A1_at	CAACCTTTAAAACTGTCACCTCTGT
AFFX-ThrX-5_at	CTGTAACAGATCAAACACCGGCGCT	Cfa.1009.1.A1_at	CCTCTGTTAAGGTTGAACTTTGCCA
AFFX-ThrX-5_at	ACACCTCTTATTCACCTGCCGAAGC	Cfa.1009.1.A1_at	AATGCTCTATTTTACTCTTGTGTGG
AFFX-ThrX-5_at	GAATTGAGCTTCATGTCAAAACGGA	Cfa.1009.1.A1_at	TACTCTTGTGTGGTTTAGGAAATAA
AFFX-ThrX-5_at	GGGATCATTTAAAGATCGCGGAATG	AFFX-r2-TagO-3_at	TGACCTTATCGACGCGCATGTGAGC
AFFX-ThrX-5_at	GAAGGCAATGACACGATTATGTGCG	AFFX-r2-TagO-3_at	CGATGTGAGCACTCTCATCTGCGGA
AFFX-ThrX-5_at	ACACGATTATGTGCGCGTCAACAGG	AFFX-r2-TagO-3_at	ATATACCGCTGCTGCACTGATATGA
AFFX-ThrX-5_at	GCGTCAACAGGTAACACTTCCGCTG	AFFX-r2-TagO-3_at	GAGTGCTACGCCTAAACTGGCTGTC
AFFX-ThrX-5_at	CACTTCCGCTGCTGCGGCAGCATAT	AFFX-r2-TagO-3_at	ACTGGCTGTCTAGCACTGTAGCTGG
AFFX-ThrX-5_at	CGGCAGCATATGCAGCCCGTGCTAA	AFFX-r2-TagO-3_at	GTAGCTGGTGCATGTACTCGACTGC
AFFX-ThrX-5_at	CAGCCCGTGCTAACATGAAATGCAT	AFFX-r2-TagO-3_at	ATCAGCTTGCGCCTATTATATGCCT
AFFX-ThrX-5_at	TGCATTGTCATCATCCCGAACGGAA	AFFX-r2-TagO-3_at	GATCACGGTGCCACAACATGCTACA
AFFX-ThrX-5_at	GGAAAACTCGCTCAAGCTGTCATGT	AFFX-r2-TagO-3_at	TCTATCCCGTGGACTCAACGTGCAT
AFFX-ThrX-5_at	GTCCGTTCCATCTGTGAGAAATCAC	AFFX-r2-TagO-3_at	CTATGCTGAGCGCGTATCTGTGTAC
AFFX-ThrX-5_at	TGTGAGAAATCACCGATTGCCCTTG	AFFX-r2-TagO-3_at	TAGCCCGACACTGTGCTCGATAAGA
AFFX-ThrX-5_at	TCAGTCAACCCTTACCGCATTGAAG	Cfa.1008.1.A1_s_at	ATGTTTGGCCATATCTTCATGCTCA
AFFX-ThrX-5_at	CTGCTGCCTTCGAAGTGTGCGAACA	Cfa.1008.1.A1_s_at	TCATGCTCATCTTTGATTTCTGAAG
AFFX-ThrX-5_at	GCTGGAAACATCACTGCGTACTGGA	Cfa.1008.1.A1_s_at	GACATACTCCCTCTTTTTTGATTTA
AFFX-ThrX-5_at	CATGAGAAAAACGGCACAGGCCTTC	Cfa.1008.1.A1_s_at	GCTGGAGACTTGCACTTGTATGGAT
AFFX-ThrX-5_at	GCGGCGGCAATCGTGCGCAATGAAG	Cfa.1008.1.A1_s_at	TATGCCTTCTAATTCTAAGATGCAG
AFFX-ThrX-5_at	GCAATCGTGCGCAATGAAGTGATTG	Cfa.1008.1.A1_s_at	GAAACTATACTATGCCCTTAAGGAG
AF243438.CDS17.S1_s_at	GACATATGTTCTTATCTCCTACGCG	Cfa.1008.1.A1_s_at	ATGCCCTTAAGGAGATCCAGTTTAA
AF243438.CDS17.S1_s_at	TACGCGCCGATGAAAGTGGATCCGA	Cfa.1008.1.A1_s_at	GGAGATCCAGTTTAATTCAAGGTGA
AF243438.CDS17.S1_s_at	GAGTATCATACTACATCGCTCTCAT	Cfa.1008.1.A1_s_at	GATCTTTTATTTACCTGTACAAGAG
AF243438.CDS17.S1_s_at	GAATCGCTATGCGTCATACCATTTA	Cfa.1008.1.A1_s_at	AGAACCACTGATTGGTATGTTCAAC
AF243438.CDS17.S1_s_at	GTGTATAACAATTCTGGCGGCGTCT	Cfa.1008.1.A1_s_at	TGGTCATTCTTACAACTACTATTTA
AF243438.CDS17.S1_s_at	GGCGGCGTCTTAACTATTATGTGGA	AFFX-Cf_Actin_M_at	CCTCCGGAACGCAAGTATTCTGTGT
AF243438.CDS17.S1_s_at	TAGTCGACAATTCTATCCCACTGTA	AFFX-Cf_Actin_M_at	TGTGTGGATCGGAGGCTCCATCCTG
AF243438.CDS17.S1_s_at	TAGCGAAGCAGCACAAGTCTTGTCT	AFFX-Cf_Actin_M_at	TGTCCACCTTCCAGCAGATGTGGAT
AF243438.CDS17.S1_s_at	GTCTTGTCTAAAAGCGTTCCTGGAT	AFFX-Cf_Actin_M_at	CAGGAGTACGACGAGTCGGGCCCCT
AF243438.CDS17.S1_s_at	AATCCGACTGACACTTTACATGAGC	AFFX-Cf_Actin_M_at	ATCGTCCATCGCAAATGCTTCTAGA
AF243438.CDS17.S1_s_at	ATGCCATACGGCTTCACGGAAGACT	AFFX-Cf_Actin_M_at	AGCGGGAGATCGTGCGTGACATCAA
AFFX-r2-Bs-dap-3_at	GATTTGACAGAAGCGGAACTCTCTT	AFFX-Cf_Actin_M_at	CAGGAGATGGCCACGGCGCGTCCTC
AFFX-r2-Bs-dap-3_at	GTACGGTCAGTTTGCGTAAAGAAGA	AFFX-Cf_Actin_M_at	CCTCGTCCTCCCTGGAGAAGAGCTA
AFFX-r2-Bs-dap-3_at	GCTGAAGCAGCCCGCATATTAGGCG	AFFX-Cf_Actin_M_at	GAGCGGTTCCGCTGCCCAAAAGCAC
AFFX-r2-Bs-dap-3_at	AAGAATTCAGCTAACGCTTCCAGAC	AFFX-Cf_Actin_M_at	TCTTCCAACCTTCTTTCCTGGGGAT
AFFX-r2-Bs-dap-3_at	CAATTCGGTCAATTGTCACTGTCAT	AFFX-Cf_Actin_M_at	CTTCCAACCTTCTTTCCTGGGGATG
AFFX-r2-Bs-dap-3_at	GAAGCGATCTTTTCCGCCGGAATCC	AFFX-Cf_Actin_M_at	GGAATCATGCGGTATCCACGAGACC
AFFX-r2-Bs-dap-3_at	TTCCGGCGCATAAAGTCAGCAAGGT	AFFX-Cf_Actin_M_at	GGTATCCACGAGACCACCTTCAACT
AFFX-r2-Bs-dap-3_at	TTCATCAGCCGGATTTTGTTATTGA	AFFX-Cf_Actin_M_at	ACCTTCAACTCCATCATGAAGTGCG
AFFX-r2-Bs-dap-3_at	TCATCAGCCGGATTTTGTTATTGAT	AFFX-Cf_Actin_M_at	TGCTGACAGGATGCAGAAGGAAATC
AFFX-r2-Bs-dap-3_at	ATCTCGGATACAATAGAGGCAAAGA	AFFX-Cf_Actin_M_at	GCCCCAGCAAGGATGAAGATCAAGA
AFFX-r2-Bs-dap-3_at	TATCCCGTCAAAGGATTCCGTTTCT	Cfa.10067.1.A1_at	GATTTTTGCATTATGCCCCATTGGA
AF243438.CDS43.S1_s_at	GTACTAAAGTATTCCAGTCCGGCAA	Cfa.10067.1.A1_at	TTGATTGACCCCTAAATGTCTGGAA
AF243438.CDS43.S1_s_at	TATGTAATGACATGCCCTCGGGTTG	Cfa.10067.1.A1_at	GAAACTTCACTTCAGGAAACTCTCC
AF243438.CDS43.S1_s_at	GAACAGCCAATATTTTCCTCGGGAA	Cfa.10067.1.A1_at	GGAAACTCTCCTCCACAAATTTTGA
AF243438.CDS43.S1_s_at	AGAGTCCGAATGGTGCTATCCGAGG	Cfa.10067.1.A1_at	GAGATGCTGCTCATCATGCATTTAT
AF243438.CDS43.S1_s_at	GAGGAATCCGCAGCACCACATGCAG	Cfa.10067.1.A1_at	AAGCCATTTCCTGGTATGGAGCCGA
AF243438.CDS43.S1_s_at	CATGCAGCGGTATACATGCTCGCAT	Cfa.10067.1.A1_at	GAGCCGAGAGCTGATACTTTCTTCT
AF243438.CDS43.S1_s_at	AATGGTAGGTGATCGTGTGCGTCAA	Cfa.10067.1.A1_at	CTGATACTTTCTTCTCCACATTTGA
AF243438.CDS43.S1_s_at	GCAGATGCGGCGATGACCTTAGCAA	Cfa.10067.1.A1_at	GAGAGCTTTTTACCAAGTGTTCAAT
AF243438.CDS43.S1_s_at	ACGGATGGACCTACTTTCGATTTTG	Cfa.10067.1.A1_at	AAGTGTTCAATAGCTTCCATGGTGA
AF243438.CDS43.S1_s_at	GGGCAGACCATATCAGAAACCAACT	Cfa.10067.1.A1_at	AATGTGCATTGCATTCTACCAGGAA
AF243438.CDS43.S1_s_at	ATGAATGTGTTTGACCTGGAGCCCA	AFFX-r2-TagD_at	TTCGTGACTAGCAGGCCTTATTCCG
AFFX-Gga-ef1a-5_s_at	GGTTCCTTCAAATATGCCTGGGTCT	AFFX-r2-TagD_at	GCCTTATTCCGGTGCTATGAGTATC
AFFX-Gga-ef1a-5_s_at	ATGCCTGGGTCTTGGACAAGCTCAA	AFFX-r2-TagD_at	ACTAGCCTGCCGGTCAATAACTGAT
AFFX-Gga-ef1a-5_s_at	CTGAGCGTGAGCGTGGTATCACTAT	AFFX-r2-TagD_at	GAGTCGGGTACTACATTCGTGCGAT
AFFX-Gga-ef1a-5_s_at	GTATCACTATCGATATTTCCCTGTG	AFFX-r2-TagD_at	GTCTATGAGGTCTCGTCTTCGTGAG
AFFX-Gga-ef1a-5_s_at	AAGCAAGTACTACGTCACCATCATC	AFFX-r2-TagD_at	ATGCCGCATATTCGGAACGTCGCCT
AFFX-Gga-ef1a-5_s_at	ATCATCGATGCTCCTGGGCACAGAG	AFFX-r2-TagD_at	AATTATCGGAACTCGTCGCTTATTT
AFFX-Gga-ef1a-5_s_at	TCCTGGGCACAGAGACTTCATTAAG	AFFX-r2-TagD_at	ACCTTGGGAGCCGTTCCTAAAGCTG
AFFX-Gga-ef1a-5_s_at	GATTACTGGAACTTCTCAGGCTGAT	AFFX-r2-TagD_at	ACGCGGAGTCAACCTGATAACCCAT
AFFX-Gga-ef1a-5_s_at	CTGATTGTGCTGTCCTGATTGTTGC	AFFX-r2-TagD_at	GGAACAGTCTAACCTACGCGAGATA
AFFX-Gga-ef1a-5_s_at	TTGGTGAGTTCGAGGCCGGTATTTC	AFFX-r2-TagD_at	ACGCGAGATACGTCTTACCGCACAT
AFFX-Gga-ef1a-5_s_at	ACACCCTGGGTGTGAAACAGCTGAT	AFFX-PheX-5_at	GACATTTTATCTTGTCCGTGAAGAT
AFFX-r2-Bs-phe-5_at	GATTCAGTAGCAGATGCCGTTCAAA	AFFX-PheX-5_at	ATCTTGTCCGTGAAGATGTATTGCC
AFFX-r2-Bs-phe-5_at	GCAGATGCCGTTCAAAAGGTCGATT	AFFX-PheX-5_at	AAGATGTATTGCCCGATGCAATGAG
AFFX-r2-Bs-phe-5_at	AGGTCGATTTAAGTAGAAGTGCGTT	AFFX-PheX-5_at	GTATTGCCCGATGCAATGAGAAAAA
AFFX-r2-Bs-phe-5_at	TTTTCCATTCTACACCATGGTAAAA	AFFX-PheX-5_at	AGCAGATTCAGTAGCAGATGCCGTT
AFFX-r2-Bs-phe-5_at	TTTGGAGGATAGGTCAGGTGCGTTA	AFFX-PheX-5_at	CAGTAGCAGATGCCGTTCAAAAGGT
AFFX-r2-Bs-phe-5_at	GGAGGATAGGTCAGGTGCGTTATCT	AFFX-PheX-5_at	TACAGGGATGCTGTTTTTCCATTCT
AFFX-r2-Bs-phe-5_at	GTAGCTGATTCTGGAAGCAACGTTC	AFFX-PheX-5_at	GGAGGATAGGTCAGGTGCGTTATCT
AFFX-r2-Bs-phe-5_at	CTGGAAGCAACGTTCTTTCCATTCA	AFFX-PheX-5_at	TAGGTCAGGTGCGTTATCTCAGCTT
AFFX-r2-Bs-phe-5_at	GTGACACTGTCTATCAGTACGTCGG	AFFX-PheX-5_at	GCGTTATCTCAGCTTCTTCAGGCGG
AFFX-r2-Bs-phe-5_at	TGACACTGTCTATCAGTACGTCGGC	AFFX-PheX-5_at	CTCAGCTTCTTCAGGCGGTAGCTGA
AFFX-r2-Bs-phe-5_at	TATCAGTACGTCGGCAATGGAAGAA	AFFX-PheX-5_at	TCTTCAGGCGGTAGCTGATTCTGGA
AF243438.CDS46.S1_s_at	AACCTGCTGCTGATACGTACATATT	AFFX-PheX-5_at	GGCGGTAGCTGATTCTGGAAGCAAC
AF243438.CDS46.S1_s_at	GAACCTGTTCTAGATGCTTGGCGAT	AFFX-PheX-5_at	CTGATTCTGGAAGCAACGTTCTTTC
AF243438.CDS46.S1_s_at	AGATGCTTGGCGATCACAGGGACAT	AFFX-PheX-5_at	TCTTTCCATTCACCAGACCATTCCG
AF243438.CDS46.S1_s_at	AGCGCGGGAACGGAGGCCATTTATA	AFFX-PheX-5_at	ACCAGACCATTCCGCTTCAAGGCAG
AF243438.CDS46.S1_s_at	ATAAACACCTATTCTGCGATCCAAT	AFFX-PheX-5_at	CCATTCCGCTTCAAGGCAGAGCAAA
AF243438.CDS46.S1_s_at	GCGATCCAATGTGTGCGGCACGAAT	AFFX-PheX-5_at	CGCTTCAAGGCAGAGCAAATGTGAC
AF243438.CDS46.S1_s_at	GATGCCACCAATCATGACGAACTAG	AFFX-PheX-5_at	GCAAATGTGACACTGTCTATCAGTA
AF243438.CDS46.S1_s_at	GAAGGTCGCGTATGTGCTGGACTTT	AFFX-PheX-5_at	CACTGTCTATCAGTACGTCGGCAAT
AF243438.CDS46.S1_s_at	AACCGCACTGTCTGCTTTCGTTAAA	AFFX-ThrX-5_at	CTGTAACAGATCAAACACCGGCGCT
AF243438.CDS46.S1_s_at	GTTGCAAAGACATTCCATCTCCTTG	AFFX-ThrX-5_at	ACACCTCTTATTCACCTGCCGAAGC
AF243438.CDS46.S1_s_at	ATCTCCTTGATATCTCTCGAGCATA	AFFX-ThrX-5_at	GAATTGAGCTTCATGTCAAAACGGA
AF243438.CDS72.S1_s_at	ATGTATAGGGTTGGCCGAGCACGCA	AFFX-ThrX-5_at	GGGATCATTTAAAGATCGCGGAATG
AF243438.CDS72.S1_s_at	GAGCACGCACGGATGGACTAACACG	AFFX-ThrX-5_at	GAAGGCAATGACACGATTATGTGCG
AF243438.CDS72.S1_s_at	TTTCCAACCCCATTGAACGCACGGA	AFFX-ThrX-5_at	ACACGATTATGTGCGCGTCAACAGG
AF243438.CDS72.S1_s_at	TCCCCACCTAAACGCTATCATAAGT	AFFX-ThrX-5_at	GCGTCAACAGGTAACACTTCCGCTG
AF243438.CDS72.S1_s_at	GCGCCGACGTGGCATATCTGTCGAT	AFFX-ThrX-5_at	CACTTCCGCTGCTGCGGCAGCATAT
AF243438.CDS72.S1_s_at	ATCTGTCGATCGAAGTGCCAACACA	AFFX-ThrX-5_at	CGGCAGCATATGCAGCCCGTGCTAA
AF243438.CDS72.S1_s_at	CACAGCCAGTTGCACACAGTACGAA	AFFX-ThrX-5_at	CAGCCCGTGCTAACATGAAATGCAT
AF243438.CDS72.S1_s_at	GAGCGCGTCAGGAGTTTTGAGTACT	AFFX-ThrX-5_at	TGCATTGTCATCATCCCGAACGGAA
AF243438.CDS72.S1_s_at	GTCATGGCTCATCGAAAGTAAGGTT	AFFX-ThrX-5_at	GGAAAACTCGCTCAAGCTGTCATGT
AF243438.CDS72.S1_s_at	TTAATAGAATCACTGCGCGGACGCA	AFFX-ThrX-5_at	GTCCGTTCCATCTGTGAGAAATCAC
AF243438.CDS72.S1_s_at	GCGCGGACGCAATATGGATTTACCA	AFFX-ThrX-5_at	TGTGAGAAATCACCGATTGCCCTTG
AFFX-r2-Bs-lys-5_at	TAGAAATCGGAGGTGTGGATGCTCT	AFFX-ThrX-5_at	TCAGTCAACCCTTACCGCATTGAAG
AFFX-r2-Bs-lys-5_at	GGATGCTCTCTATTTAGCGGAGAAA	AFFX-ThrX-5_at	CTGCTGCCTTCGAAGTGTGCGAACA
AFFX-r2-Bs-lys-5_at	AGCGGAGAAATATGGTACACCTCTT	AFFX-ThrX-5_at	GCTGGAAACATCACTGCGTACTGGA
AFFX-r2-Bs-lys-5_at	GGAGAAATATGGTACACCTCTTTAC	AFFX-ThrX-5_at	CATGAGAAAAACGGCACAGGCCTTC
AFFX-r2-Bs-lys-5_at	TACACCTCTTTACGTATATGATGTG	AFFX-ThrX-5_at	GCGGCGGCAATCGTGCGCAATGAAG
AFFX-r2-Bs-lys-5_at	CACCTCTTTACGTATATGATGTGGC	AFFX-ThrX-5_at	GCAATCGTGCGCAATGAAGTGATTG
AFFX-r2-Bs-lys-5_at	GGCTTTAATACGTGAGCGTGCTAAA	AFFX-Cfa-r2-Ec-bioB-M_at	ATGACGCTGGGCACGTTGAGTGAAT
AFFX-r2-Bs-lys-5_at	GCAGGCGTTTATTTCTGCAGGGCTG	AFFX-Cfa-r2-Ec-bioB-M_at	TGAGTGAATCTCAGGCGCAGCGCCT
AFFX-r2-Bs-lys-5_at	ATCAGTCGCAATGATTCAGCTCGCT	AFFX-Cfa-r2-Ec-bioB-M_at	GAACGCCGGGCTGGATTACTACAAC
AFFX-r2-Bs-lys-5_at	GGACTTTCTTTAGATGTCGTATCCG	AFFX-Cfa-r2-Ec-bioB-M_at	GAGTTTTACGGCAATATCATCACCA
AFFX-r2-Bs-lys-5_at	GAGAGCTATATACGGCTGTTGCAGC	AFFX-Cfa-r2-Ec-bioB-M_at	ATCACCACACGCACTTATCAGGAAC
AFFX-r2-Bs-thr-M_s_at	TGAAATCCTTCACGCATATCAGCTG	AFFX-Cfa-r2-Ec-bioB-M_at	GGAACGCCTCGATACGCTGGAAAAA
AFFX-r2-Bs-thr-M_s_at	TATCAGCTGATCGCCCGTGTAGAAG	AFFX-Cfa-r2-Ec-bioB-M_at	GCGCGATGCCGGGATCAAAGTCTGT
AFFX-r2-Bs-thr-M_s_at	GTTCTTGCGCGTCTATCGCAGGAGT	AFFX-Cfa-r2-Ec-bioB-M_at	TCAAAGTCTGTTCTGGCGGCATTGT
AFFX-r2-Bs-thr-M_s_at	AGATCCGAACACAGCGGTCGACATT	AFFX-Cfa-r2-Ec-bioB-M_at	AGATCGCGCCGGATTATTGCTGCAA
AFFX-r2-Bs-thr-M_s_at	AAATCAAGCCTGTCACATTGCCGAC	AFFX-Cfa-r2-Ec-bioB-M_at	ATTGCTGCAACTGGCAAACCTGCCG
AFFX-r2-Bs-thr-M_s_at	GAACGAAGCCGACATGCTGTTCTCT	AFFX-Cfa-r2-Ec-bioB-M_at	GCCGGAAAGCGTGCCAATCAACATG
AFFX-r2-Bs-thr-M_s_at	TCTGTCACTGTTCCCGGAAGCACAG	Cfa.10019.1.S1_at	AAAACTGTCCAAGTAGAGCAGCAAG
AFFX-r2-Bs-thr-M_s_at	GCCCCGGCTTTGATTCAGTCGGAAT	Cfa.10019.1.S1_at	GTCCAAGTAGAGCAGCAAGTACACA
AFFX-r2-Bs-thr-M_s_at	TCAGTCGGAATGGCGCTCAGCAGAT	Cfa.10019.1.S1_at	AGACCTTAAGAGGAGCATTATTACA
AFFX-r2-Bs-thr-M_s_at	GATAACCTGATCTACCAAGTGGCTA	Cfa.10019.1.S1_at	ATATTGCTGCAGACTTCCTTTTTCA
AFFX-r2-Bs-thr-M_s_at	AAATGCCTCCTGTCCATGTGAAGGT	Cfa.10019.1.S1_at	GCTGCAGACTTCCTTTTTCAAAAAG
AFFX-LysX-3_at	TGGAGAGATTCATATTCATTTGTAT	Cfa.10019.1.S1_at	AAAGGCTGTCACTAATTTTTCAAAT
AFFX-LysX-3_at	ATTCATATTCATTTGTATCCAAGGT	Cfa.10019.1.S1_at	CTTGGTTGTACTTAGAATGGTTTCA
AFFX-LysX-3_at	CATATTCATTTGTATCCAAGGTGCT	Cfa.10019.1.S1_at	CTTAGAATGGTTTCAGTTTTGCTGA
AFFX-LysX-3_at	CATTTGTATCCAAGGTGCTGAATCT	Cfa.10019.1.S1_at	CAGTTTTGCTGAATACTTTATAAAG
AFFX-LysX-3_at	TTTGTATCCAAGGTGCTGAATCTTG	Cfa.10019.1.S1_at	GTAAGGGATTTGAGTCCCATCTTCA
AFFX-LysX-3_at	TATCCAAGGTGCTGAATCTTGGAGG	Cfa.10019.1.S1_at	GATTTGAGTCCCATCTTCATTGTCC
AFFX-LysX-3_at	TATTCGTTATACGGAAGATGATGAA	Cfa.10038.1.A1_at	GATCTTCTCTCATACCCTAACAGAT
AFFX-LysX-3_at	AAGATGATGAACCGCTTCATGCCAC	Cfa.10038.1.A1_at	GTAATTCAGTGCTAGCCTGTGATTT
AFFX-LysX-3_at	ATGATGAACCGCTTCATGCCACTGA	Cfa.10038.1.A1_at	TGAGTCGTAGACCTGTTGCTGCCTG
AFFX-LysX-3_at	TGAACCGCTTCATGCCACTGAATAC	Cfa.10038.1.A1_at	TTCTAAAACTGTCCATTTCTCTTCC
AFFX-LysX-3_at	ACCGCTTCATGCCACTGAATACGTT	Cfa.10038.1.A1_at	CATTTCTCTTCCCAGTTTACACAAA
AFFX-LysX-3_at	TGGGAGACGCAGGCACAACTCTTTA	Cfa.10038.1.A1_at	AAGTCAGTCCTATTGTCTCTTTCTG
AFFX-LysX-3_at	GAGACGCAGGCACAACTCTTTATAC	Cfa.10038.1.A1_at	GGGCAAGTATTTCTCACACACGCAT
AFFX-LysX-3_at	GCACAACTCTTTATACGGTTGGCTC	Cfa.10038.1.A1_at	ATTGTAGACTCTGGGCTCAAGTTCC
AFFX-LysX-3_at	ATAAGCTGTACAATCGTTTCATCAT	Cfa.10038.1.A1_at	AGTTCCAGGAATCTGAACCCTTGGA
AFFX-LysX-3_at	AGCTGTACAATCGTTTCATCATTCG	Cfa.10038.1.A1_at	GAAGCATCGGTGAGGTTTCCCACGT
AFFX-LysX-3_at	CTGTACAATCGTTTCATCATTCGGC	Cfa.10038.1.A1_at	TGGCGCATCCCTTTGGAGACAGCAC
AFFX-LysX-3_at	TACAATCGTTTCATCATTCGGCGTG	Cfa.10064.1.A1_at	GAAATTGTTGACTCCATTACCTATT
AFFX-LysX-3_at	AATCGTTTCATCATTCGGCGTGCGA	Cfa.10064.1.A1_at	GACTCCATTACCTATTTATTCCACC
AFFX-LysX-3_at	CGTTTCATCATTCGGCGTGCGAATT	Cfa.10064.1.A1_at	GAAACCATCCTGGACTCACCTTTAA
AB112960.CDS1.S1_at	GTTATCTTGTTGCTAGTAGTATGCT	Cfa.10064.1.A1_at	GAAAACGTACTCCTGACGACCTATG
AB112960.CDS1.S1_at	CTTGTTGCTAGTAGTATGCTTGCCT	Cfa.10064.1.A1_at	ACTCCTGACGACCTATGGAATGGGA
AB112960.CDS1.S1_at	TTGCCTTGCCTTTTACAATTTGTAT	Cfa.10064.1.A1_at	AAAATACCTGCCAATTCCTAGAATT
AB112960.CDS1.S1_at	CAATTTGTATCTAGTAGCATTCGAA	Cfa.10064.1.A1_at	GAATCCAATTTTTCCTGTGTACCAA
AB112960.CDS1.S1_at	GATGATTGATAGTTCACTCGGCTAC	Cfa.10064.1.A1_at	CTGTGTACCAAGACCACCAGGGAGT
AB112960.CDS1.S1_at	GATTGATAGTTCACTCGGCTACCGC	Cfa.10064.1.A1_at	ACCAGGGAGTGTCCTTGTTGCCATG
AB112960.CDS1.S1_at	TAGTTCACTCGGCTACCGCGAGGAA	Cfa.10064.1.A1_at	TAAGAACCCAGTTACCAGTATCTAT
AB112960.CDS1.S1_at	GCTACCGCGAGGAATGCAGGAAATT	Cfa.10064.1.A1_at	CCATTTCCAAATCCCTTGTCATTGA
AB112960.CDS1.S1_at	AATGCAGGAAATTACAAAAGGCCAG	AFFX-LysX-3_at	TGGAGAGATTCATATTCATTTGTAT
AB112960.CDS1.S1_at	AAAAGGCCAGTAGACAGCCTGCAAA	AFFX-LysX-3_at	ATTCATATTCATTTGTATCCAAGGT
AB112960.CDS1.S1_at	GTAGACAGCCTGCAAAGGCAGTGTA	AFFX-LysX-3_at	CATATTCATTTGTATCCAAGGTGCT
AF243438.CDS59.S1_s_at	GCATGGCCCCATTTGTGTTGTGGAT	AFFX-LysX-3_at	CATTTGTATCCAAGGTGCTGAATCT
AF243438.CDS59.S1_s_at	TATGTTCGTCATCGCGACAACGTTA	AFFX-LysX-3_at	TTTGTATCCAAGGTGCTGAATCTTG
AF243438.CDS59.S1_s_at	GTTTGCATTCTCGTACATGTCTCTA	AFFX-LysX-3_at	TATCCAAGGTGCTGAATCTTGGAGG
AF243438.CDS59.S1_s_at	ATTAGGGTACAGTTGCATGCGCGTG	AFFX-LysX-3_at	TATTCGTTATACGGAAGATGATGAA
AF243438.CDS59.S1_s_at	GGTTGAAGCAATTGTCCCATTCGGC	AFFX-LysX-3_at	AAGATGATGAACCGCTTCATGCCAC
AF243438.CDS59.S1_s_at	GCTCCACGAATGCTTCCTTTGGAAA	AFFX-LysX-3_at	ATGATGAACCGCTTCATGCCACTGA
AF243438.CDS59.S1_s_at	TGTATACTACCCACCATTGGAGGTC	AFFX-LysX-3_at	TGAACCGCTTCATGCCACTGAATAC
AF243438.CDS59.S1_s_at	ATTGGAGGTCCTATATCGGTCGATT	AFFX-LysX-3_at	ACCGCTTCATGCCACTGAATACGTT
AF243438.CDS59.S1_s_at	GACCATTAAGTACCGCGGCTTCTAT	AFFX-LysX-3_at	TGGGAGACGCAGGCACAACTCTTTA
AF243438.CDS59.S1_s_at	GATGCTCGTATCTATCTTCGTTTAG	AFFX-LysX-3_at	GAGACGCAGGCACAACTCTTTATAC
AF243438.CDS59.S1_s_at	GAAGTTTACAGTTCCATTCTCTCGA	AFFX-LysX-3_at	GCACAACTCTTTATACGGTTGGCTC
AF243438.CDS85.S1_s_at	TGTCGGCCCATTAACTCTCATGGAT	AFFX-LysX-3_at	ATAAGCTGTACAATCGTTTCATCAT
AF243438.CDS85.S1_s_at	ATCTATGTTGTACCGGCAATGTCCG	AFFX-LysX-3_at	AGCTGTACAATCGTTTCATCATTCG
AF243438.CDS85.S1_s_at	GTCCGGTATACAGTCGAAACGCGCC	AFFX-LysX-3_at	CTGTACAATCGTTTCATCATTCGGC
AF243438.CDS85.S1_s_at	GAAGACGTATCTTGCGTTCCTACTA	AFFX-LysX-3_at	TACAATCGTTTCATCATTCGGCGTG
AF243438.CDS85.S1_s_at	CCCCTCTTTTATTTTGCTGCAGTTA	AFFX-LysX-3_at	AATCGTTTCATCATTCGGCGTGCGA
AF243438.CDS85.S1_s_at	AACACGTGAGGCCAGACTTTCTCTG	AFFX-LysX-3_at	CGTTTCATCATTCGGCGTGCGAATT
AF243438.CDS85.S1_s_at	AGACATATTCTAACCGAGCTGCACG	Cfa.10077.1.A1_at	GAAGTCTCCTTGCTTCTCTGAAAAA
AF243438.CDS85.S1_s_at	GCTCGTAATCTTTGTCGGTCTGTAA	Cfa.10077.1.A1_at	AGCGCAAGGTTTTGCTCTCAGCCAA
AF243438.CDS85.S1_s_at	GTTGTTGTTCACATTCCCGAGGGAA	Cfa.10077.1.A1_at	GACAAATCATAATCATCTTCCCAGG
AF243438.CDS85.S1_s_at	GAACATGTTCCGCTCTAGCAGAAGA	Cfa.10077.1.A1_at	TGGATCTTTAACTCCCTTTTGTCTC
AF243438.CDS85.S1_s_at	ATCGGGACACGACCTTTACAGACTA	Cfa.10077.1.A1_at	AGAGCTGGCAAACCACGGCCATGTA
AF243438.CDS11.S1_s_at	TAGGGCCAATTCTATCAGCGTACGC	Cfa.10077.1.A1_at	GTATATGACTGCTCTGGTGTTCCAA
AF243438.CDS11.S1_s_at	AATAGTAGTTATTATCCGCTCCCTC	Cfa.10077.1.A1_at	CCTTTACTCCTGATCTAGACCATAA
AF243438.CDS11.S1_s_at	TATGCAACTACGGTCTGGCGTCAGA	Cfa.10077.1.A1_at	CCAGGCTTGGCTTTCATGATGTTTG
AF243438.CDS11.S1_s_at	GGACATATTTTTCCCGTGTATCCAT	Cfa.10077.1.A1_at	ATAAAACACTAACTCGCACTGCCTG
AF243438.CDS11.S1_s_at	GTGTATCCATCCAACAATTGCCTGC	Cfa.10077.1.A1_at	TACTATTTCGTGTGTGTTGGCCTTA
AF243438.CDS11.S1_s_at	GCCATTATTTGGAGACGCCCTGTAT	Cfa.10077.1.A1_at	GTGTGTGCCTCAAGGGAAGTCTCCT
AF243438.CDS11.S1_s_at	ATCAGATCGGTTGTCTACTTCGAGT	AFFX-Cfa-r2-P1-cre-3_s_at	GATATCTCACGTACTGACGGTGGGA
AF243438.CDS11.S1_s_at	ATGAACATTACCGTCCTGATACCTG	AFFX-Cfa-r2-P1-cre-3_s_at	GGAGAATGTTAATCCATATTGGCAG
AF243438.CDS11.S1_s_at	CTGATACCTGGTCTATACACGCTTA	AFFX-Cfa-r2-P1-cre-3_s_at	TATTGGCAGAACGAAAACGCTGGTT
AF243438.CDS11.S1_s_at	TACACGCTTAGGTGGTTTTTCCCAT	AFFX-Cfa-r2-P1-cre-3_s_at	AAAACGCTGGTTAGCACCGCAGGTG
AF243438.CDS11.S1_s_at	AGCTCTCACAACTTCGCGGGTATGA	AFFX-Cfa-r2-P1-cre-3_s_at	ACCGCAGGTGTAGAGAAGGCACTTA
AFFX-r2-Ec-bioD-5_at	CCTCTGGCAGCGAAAAGACCCCGGA	AFFX-Cfa-r2-P1-cre-3_s_at	GGGTAACTAAACTGGTCGAGCGATG
AFFX-r2-Ec-bioD-5_at	CTGGCAGCGAAAAGACCCCGGAAGG	AFFX-Cfa-r2-P1-cre-3_s_at	GGTCGAGCGATGGATTTCCGTCTCT
AFFX-r2-Ec-bioD-5_at	AGCCTGCAGCTGGATTACGCAACAG	AFFX-Cfa-r2-P1-cre-3_s_at	TTCCGTCTCTGGTGTAGCTGATGAT
AFFX-r2-Ec-bioD-5_at	CCTGCAGCTGGATTACGCAACAGTA	AFFX-Cfa-r2-P1-cre-3_s_at	GCTGATGATCCGAATAACTACCTGT
AFFX-r2-Ec-bioD-5_at	ACGCAACAGTAAATCCTTACACCTT	AFFX-Cfa-r2-P1-cre-3_s_at	ATCCGAATAACTACCTGTTTTGCCG
AFFX-r2-Ec-bioD-5_at	CGCAACAGTAAATCCTTACACCTTC	AFFX-Cfa-r2-P1-cre-3_s_at	AAAAAATGGTGTTGCCGCGCCATCT
AFFX-r2-Ec-bioD-5_at	GTAAATCCTTACACCTTCGCAGAAC	AFFX-r2-TagJ-5_at	GTGACGCAGCTCTTAGCGCAATGTA
AFFX-r2-Ec-bioD-5_at	CTTACACCTTCGCAGAACCCACTTC	AFFX-r2-TagJ-5_at	ATGATAGGCTAGTCTCGCGCAGTAC
AFFX-r2-Ec-bioD-5_at	GGGCAGACCGATAGAATCATTGGTA	AFFX-r2-TagJ-5_at	AACGCTATGGCGTGCTAGTCGTCTC
AFFX-r2-Ec-bioD-5_at	GAATCATTGGTAATGAGCGCCGGAT	AFFX-r2-TagJ-5_at	GCTAGTCGTCTCATATACGTCTGAT
AFFX-r2-Ec-bioD-5_at	GCAGCAGGCTACCGGACGGCAGGTT	AFFX-r2-TagJ-5_at	ACGTCTGATGACCTCGTATCATGTT
AFFX-Gga-r2-Ec-bioB-M_at	GACGCTGGGCACGTTGAGTGAATCT	AFFX-r2-TagJ-5_at	AGGGCTGCGAACTGTCGATGATGGT
AFFX-Gga-r2-Ec-bioB-M_at	TGAGTGAATCTCAGGCGCAGCGCCT	AFFX-r2-TagJ-5_at	CGATGATGGTCACGACTCTGTCGAT
AFFX-Gga-r2-Ec-bioB-M_at	GAACGCCGGGCTGGATTACTACAAC	AFFX-r2-TagJ-5_at	GCAGCCTATATGATACGCAGTCGCA
AFFX-Gga-r2-Ec-bioB-M_at	GACACCTCGCCGGAGTTTTACGGCA	AFFX-r2-TagJ-5_at	TCGCATCCTATCTTACGTGTCAGTA
AFFX-Gga-r2-Ec-bioB-M_at	TTACGGCAATATCATCACCACACGC	AFFX-r2-TagJ-5_at	GCCTAGTACGCTGACGGCATTCAGA
AFFX-Gga-r2-Ec-bioB-M_at	ACACGCACTTATCAGGAACGCCTCG	AFFX-r2-TagJ-5_at	AGAGTACGCTGATCGGCTTATGACG
AFFX-Gga-r2-Ec-bioB-M_at	GGAACGCCTCGATACGCTGGAAAAA	AFFX-Cfa-r2-Ec-bioC-5_at	CTGGCAATGCTTCCACAGCGTAAAT
AFFX-Gga-r2-Ec-bioB-M_at	AAAAGTGCGCGATGCCGGGATCAAA	AFFX-Cfa-r2-Ec-bioC-5_at	GTAAATACACCCACGTACTGGACGC
AFFX-Gga-r2-Ec-bioB-M_at	GGATCAAAGTCTGTTCTGGCGGCAT	AFFX-Cfa-r2-Ec-bioC-5_at	GCAGGTGACGGCCTTAGATCTCTCG
AFFX-Gga-r2-Ec-bioB-M_at	AGATCGCGCCGGATTATTGCTGCAA	AFFX-Cfa-r2-Ec-bioC-5_at	CAATGCTTGTTCAGGCACGCCAGAA
AFFX-Gga-r2-Ec-bioB-M_at	GCCGGAAAGCGTGCCAATCAACATG	AFFX-Cfa-r2-Ec-bioC-5_at	AGGATGCCGCAGACCATTATCTGGC
AFFX-Gga-r2-P1-cre-5_s_at	GATCGCCAGGCGTTTTCTGAGCATA	AFFX-Cfa-r2-Ec-bioC-5_at	GGAGATATCGAATCCCTGCCGTTAG
AFFX-Gga-r2-P1-cre-5_s_at	GGCGTTTTCTGAGCATACCTGGAAA	AFFX-Cfa-r2-Ec-bioC-5_at	TGCCGTTAGCGACTGCGACGTTCGA
AFFX-Gga-r2-P1-cre-5_s_at	GGAAAATGCTTCTGTCCGTTTGCCG	AFFX-Cfa-r2-Ec-bioC-5_at	GCGACGTTCGATCTTGCATGGAGCA
AFFX-Gga-r2-P1-cre-5_s_at	AATGGTTTCCCGCAGAACCTGAAGA	AFFX-Cfa-r2-Ec-bioC-5_at	GCATGGAGCAATCTCGCAGTGCAGT
AFFX-Gga-r2-P1-cre-5_s_at	AACCTGAAGATGTTCGCGATTATCT	AFFX-Cfa-r2-Ec-bioC-5_at	TGCGGTAATTTATCCACGGCACTCC
AFFX-Gga-r2-P1-cre-5_s_at	TTATCTTCTATATCTTCAGGCGCGC	AFFX-Cfa-r2-Ec-bioC-5_at	GAGTGCTGACGCCTTACTGGCAATG
AFFX-Gga-r2-P1-cre-5_s_at	TCAGGCGCGCGGTCTGGCAGTAAAA	AFFX-Cfa-gapdh-M_x_at	AAGATGTGGCGTGACGGCCGAGGGG
AFFX-Gga-r2-P1-cre-5_s_at	TATCCAGCAACATTTGGGCCAGCTA	AFFX-Cfa-gapdh-M_x_at	AGATGTGGCGTGACGGCCGAGGGGC
AFFX-Gga-r2-P1-cre-5_s_at	TAAACATGCTTCATCGTCGGTCCGG	AFFX-Cfa-gapdh-M_x_at	GATGTGGCGTGACGGCCGAGGGGCT
AFFX-Gga-r2-P1-cre-5_s_at	GGCTGCCACGACCAAGTGACAGCAA	AFFX-Cfa-gapdh-M_x_at	CCACCCCCAATGTATCAGTTGTGGA
AFFX-Gga-r2-P1-cre-5_s_at	AAACAGGCTCTAGCGTTCGAACGCA	AFFX-Cfa-gapdh-M_x_at	CACCCCCAATGTATCAGTTGTGGAT
AF243438.CDS88.S1_s_at	CCCCTCCCGCAAATTCAGAATTGTA	AFFX-Cfa-gapdh-M_x_at	CCCCCAATGTATCAGTTGTGGATCT
AF243438.CDS88.S1_s_at	GGAATATACATACCACACACTTTGA	AFFX-Cfa-gapdh-M_x_at	CCCCAATGTATCAGTTGTGGATCTG
AF243438.CDS88.S1_s_at	CCACACACTTTGATATTTTGGATGT	AFFX-Cfa-gapdh-M_x_at	AGGCATCGGAGGGACCCCTCAAAGG
AF243438.CDS88.S1_s_at	TATTTTGGATGTGTCCCAGGGCAAT	AFFX-Cfa-gapdh-M_x_at	GGCATCGGAGGGACCCCTCAAAGGC
AF243438.CDS88.S1_s_at	CCAGGGCAATGGGAACAGCAATCAC	AFFX-Cfa-gapdh-M_x_at	GCATCGGAGGGACCCCTCAAAGGCA
AF243438.CDS88.S1_s_at	AGCAATCACTTTCGAATTCCTTCAG	AFFX-Cfa-gapdh-M_x_at	CATCGGAGGGACCCCTCAAAGGCAT
AF243438.CDS88.S1_s_at	TTTCGAATTCCTTCAGCCCAAAGCA	Cfa.10032.1.A1_at	CTGCTGGTCCAGATAGAGATCAAAG
AF243438.CDS88.S1_s_at	TTCAGCCCAAAGCACAACCGCGGGT	Cfa.10032.1.A1_at	GGTGGCATCATAAGGCTGTTAGGTA
AF243438.CDS88.S1_s_at	GGTCCACCGGGACTCTCCGACATAG	Cfa.10032.1.A1_at	TAAGGCTGTTAGGTACGTTTGTGCA
AF243438.CDS88.S1_s_at	GGGAAACATTGCTCGATAATCGCGT	Cfa.10032.1.A1_at	TGCACCAGGTGCCACAGGCCAAGTC
AF243438.CDS88.S1_s_at	TCGATAATCGCGTAGCCAGACCGCA	Cfa.10032.1.A1_at	ACAGGCCAAGTCCAGCCTATGATTA
AFFX-r2-TagO-5_at	CATGCTAACTGATACACGCTGCTCG	Cfa.10032.1.A1_at	GTCCAGCCTATGATTATACAGTATT
AFFX-r2-TagO-5_at	GCTGCTCGAACAGTGATACGCACAC	Cfa.10032.1.A1_at	ATACAGTATTTCATGGATTCTAAGA
AFFX-r2-TagO-5_at	GAGCCGCAATGCACGACTGATACTC	Cfa.10032.1.A1_at	GCACATTATTTTCACATTGTGATGT
AFFX-r2-TagO-5_at	GAGCAGCAGTCGGCTATGATTTGCA	Cfa.10032.1.A1_at	GTCTTTGGAATTGGGATTTGTCTTA
AFFX-r2-TagO-5_at	GTATCCTGATCGTGCGTGCGATGTC	Cfa.10032.1.A1_at	GGGATTTGTCTTACAATCAATAGCT
AFFX-r2-TagO-5_at	CGATGTCTGATAATACGCTCGCATG	Cfa.10032.1.A1_at	GTGAGATTTCTCCTAGTGGCTCCCA
AFFX-r2-TagO-5_at	GAGTTGTCGCAGTGTCTGTACCAAT	AFFX-BioB-M_at	GCCGGAGTTTTACGGCAATATCATC
AFFX-r2-TagO-5_at	GATATGTATTGCGCTCAGATGCTGG	AFFX-BioB-M_at	GTTTTACGGCAATATCATCACCACA
AFFX-r2-TagO-5_at	TGCCATGCGTGCTGTCAGTATGCCA	AFFX-BioB-M_at	GCAATATCATCACCACACGCACTTA
AFFX-r2-TagO-5_at	GGAGCTATATAAGCCGCTGTTGCGT	AFFX-BioB-M_at	ATCACCACACGCACTTATCAGGAAC
AFFX-r2-TagO-5_at	TCAACGGCATGATCCCTATGACCGC	AFFX-BioB-M_at	ACGCACTTATCAGGAACGCCTCGAT
AF243438.CDS14.S1_s_at	ATAAGCTCCATTATGCGGCTCGACT	AFFX-BioB-M_at	ATACGCTGGAAAAAGTGCGCGATGC
AF243438.CDS14.S1_s_at	GACTGCCTTCCGAACTTATTATCTT	AFFX-BioB-M_at	GGAAAAAGTGCGCGATGCCGGGATC
AF243438.CDS14.S1_s_at	ATCAGACGATATTCCCACGGGCATT	AFFX-BioB-M_at	AGTGCGCGATGCCGGGATCAAAGTC
AF243438.CDS14.S1_s_at	ATAGAGTACTCGTGCATCTTTCCTT	AFFX-BioB-M_at	GCCGGGATCAAAGTCTGTTCTGGCG
AF243438.CDS14.S1_s_at	AACTGCAGCATACCCGAATTCATTC	AFFX-BioB-M_at	AAGTCTGTTCTGGCGGCATTGTGGG
AF243438.CDS14.S1_s_at	GGATCAATCCTATTATGGGCACTGT	AFFX-BioB-M_at	AAGATCGCGCCGGATTATTGCTGCA
AF243438.CDS14.S1_s_at	CATCTTTCCTTCGTGCTAGGTATGT	AFFX-BioB-M_at	GCCGGATTATTGCTGCAACTGGCAA
AF243438.CDS14.S1_s_at	ATCGCGGATCGGGTTGCATCAATTT	AFFX-BioB-M_at	ATTGCTGCAACTGGCAAACCTGCCG
AF243438.CDS14.S1_s_at	TTAATTGCGCCTGCCGATATTTCAT	AFFX-BioB-M_at	CGCCGGAAAGCGTGCCAATCAACAT
AF243438.CDS14.S1_s_at	CAATACGGTTCTCGCATGGTCGAAA	AFFX-BioB-M_at	AAGCGTGCCAATCAACATGCTGGTG
AF243438.CDS14.S1_s_at	TACGACCTGGTACACGGCTTTATGA	AFFX-BioB-M_at	CAATCAACATGCTGGTGAAGGTGAA
AFFX-BioB-M_at	GCCGGAGTTTTACGGCAATATCATC	AFFX-BioB-M_at	TGGTGAAGGTGAAAGGCACGCCGCT
AFFX-BioB-M_at	GTTTTACGGCAATATCATCACCACA	AFFX-BioB-M_at	ACGCCGCTTGCCGATAACGATGATG
AFFX-BioB-M_at	GCAATATCATCACCACACGCACTTA	AFFX-BioB-M_at	TTGCCGATAACGATGATGTCGATGC
AFFX-BioB-M_at	ATCACCACACGCACTTATCAGGAAC	AFFX-BioB-M_at	ACGATGATGTCGATGCCTTTGATTT
AFFX-BioB-M_at	ACGCACTTATCAGGAACGCCTCGAT	Cfa.10045.1.A1_at	TTGTGGCTCTCTGACCTGAGGCCAG
AFFX-BioB-M_at	ATACGCTGGAAAAAGTGCGCGATGC	Cfa.10045.1.A1_at	GCTGGTAGCAAGAAAAAGGTCCCTC
AFFX-BioB-M_at	GGAAAAAGTGCGCGATGCCGGGATC	Cfa.10045.1.A1_at	GTAATAAGCTCTGGGTTTGCTCTTT
AFFX-BioB-M_at	AGTGCGCGATGCCGGGATCAAAGTC	Cfa.10045.1.A1_at	TGGGTTTGCTCTTTGGGCTTCTCAA
AFFX-BioB-M_at	GCCGGGATCAAAGTCTGTTCTGGCG	Cfa.10045.1.A1_at	ACTATTAAGTATTCCAGCATGTTGC
AFFX-BioB-M_at	AAGTCTGTTCTGGCGGCATTGTGGG	Cfa.10045.1.A1_at	AGCATGTTGCTGACCTAGTTGGATA
AFFX-BioB-M_at	AAGATCGCGCCGGATTATTGCTGCA	Cfa.10045.1.A1_at	GACCTAGTTGGATAGTTGTACCTCA
AFFX-BioB-M_at	GCCGGATTATTGCTGCAACTGGCAA	Cfa.10045.1.A1_at	GTGAGAAAAGGCTTCCTTGTCCCAG
AFFX-BioB-M_at	ATTGCTGCAACTGGCAAACCTGCCG	Cfa.10045.1.A1_at	TTCCTTGTCCCAGGTTGTCAAATAA
AFFX-BioB-M_at	CGCCGGAAAGCGTGCCAATCAACAT	Cfa.10045.1.A1_at	GAAGAGCTCACTTACGTGCCAAAAT
AFFX-BioB-M_at	AAGCGTGCCAATCAACATGCTGGTG	Cfa.10045.1.A1_at	ACTGAGATATCATGCTAAGGACCAA
AFFX-BioB-M_at	CAATCAACATGCTGGTGAAGGTGAA	Cfa.10071.1.A1_at	CCTGCCCTGACATTCATTCAGTTGT
AFFX-BioB-M_at	TGGTGAAGGTGAAAGGCACGCCGCT	Cfa.10071.1.A1_at	CACAGGTGCCTGTGTGTGTTCACAC
AFFX-BioB-M_at	ACGCCGCTTGCCGATAACGATGATG	Cfa.10071.1.A1_at	GTGTGTGTTCACACGTGTACGTATA
AFFX-BioB-M_at	TTGCCGATAACGATGATGTCGATGC	Cfa.10071.1.A1_at	GTACGTATATTACTCCTGTTCTGGG
AFFX-BioB-M_at	ACGATGATGTCGATGCCTTTGATTT	Cfa.10071.1.A1_at	TCTTCACTTGACACTTGATCTTGGG
AFFX-r2-TagE_at	TACAGCTTACCTACTATGCGTGCAA	Cfa.10071.1.A1_at	GATCTTGGGATCATTCTGTGTCAGG
AFFX-r2-TagE_at	TTACCGAGCTGACGTCGCGTTAGAC	Cfa.10071.1.A1_at	GTCAGGTAGCAGAGCTGCTGCGCTC
AFFX-r2-TagE_at	GCGTTAGACAGCTCATTCGTCACGT	Cfa.10071.1.A1_at	GCTCCGGCAGCTGCATACATTATGG
AFFX-r2-TagE_at	GTCGTCTAGCTTAATACCTCTGCGT	Cfa.10071.1.A1_at	CCTCGGGATGGACTTTTGTTCCTGA
AFFX-r2-TagE_at	GATCACGTTAGATCCACTGCGTCAC	Cfa.10071.1.A1_at	GTTCCTGATACATTTTGCAACAACA
AFFX-r2-TagE_at	TGCGTCACGTTACCTACATGATCGA	Cfa.10071.1.A1_at	TTGGGATGTGGATATCTGCCCTGCC
AFFX-r2-TagE_at	GAGTCCTGCACGTTAGAACACTGGC	Cfa.10048.1.A1_at	GTTTTTCCTATTCAGGCAACTCCTA
AFFX-r2-TagE_at	GGCGCGTTCGACATAATTGCCGACG	Cfa.10048.1.A1_at	ATATCATTTTTGTGACCACCCCATG
AFFX-r2-TagE_at	AGTCACTCTCGACCTAGCGTAAGGA	Cfa.10048.1.A1_at	CACCCCATGAAGACCTGACTTTTTT
AFFX-r2-TagE_at	TGCGAGGTTCGCTTACGTTGCATAG	Cfa.10048.1.A1_at	AGACCTGACTTTTTTGTTTACATGA
AFFX-r2-TagE_at	GGATCGCTTAACCTCTATGCGTACA	Cfa.10048.1.A1_at	AATACGTGGATGTGTTTCTCACCTT
AFFX-Gga-TrpnX-M_at	TTTCGGTTTCACAAATGGCAGACTT	Cfa.10048.1.A1_at	GATGTGTTTCTCACCTTGAAGGTTT
AFFX-Gga-TrpnX-M_at	GTGCAGTCACCGAAAGAGAGCGCCT	Cfa.10048.1.A1_at	GAAGGTTTCAGATAGTCTTTCTAGA
AFFX-Gga-TrpnX-M_at	GAGAGCGCCTATCTCATTCAGAATA	Cfa.10048.1.A1_at	ATGCCAATTCCTTGCAAACTCTGAA
AFFX-Gga-TrpnX-M_at	GCAGCAGTTCCGCTTTATCTATTAC	Cfa.10048.1.A1_at	AATTAACTCAGGCTGACACGGCGCA
AFFX-Gga-TrpnX-M_at	GAGCTGCGATTTACACGGCGGGAAT	Cfa.10048.1.A1_at	GCTGACACGGCGCAAGACAAATCTT
AFFX-Gga-TrpnX-M_at	GGGAATTACCGCCTCACTGAAGGAA	Cfa.10048.1.A1_at	ATGCTCCACTGGCTTCCTGGATGAC
AFFX-Gga-TrpnX-M_at	TGCCGCGCAGCTTGAACGACTAAAG	AFFX-Cf_Gapdh_5_at	CTTCATTGATCTCAACTACATGGTG
AFFX-Gga-TrpnX-M_at	AAACACTGGTTTTGCCGGTAGAGCA	AFFX-Cf_Gapdh_5_at	CAGTATGATTCTACCCACGGCAAAT
AFFX-Gga-TrpnX-M_at	GGTAGAGCAGCCTTTCGAGAAACGT	AFFX-Cf_Gapdh_5_at	CACGGCAAATTCCACGGCACAGTCA
AFFX-Gga-TrpnX-M_at	TAAGGAGGCGCTGGCAAGCCCGAAT	AFFX-Cf_Gapdh_5_at	AGTCAAGGCTGAGAACGGGAAACTT
AFFX-Gga-TrpnX-M_at	AAGCATCGCCGTCAAAAGGGCTTAT	AFFX-Cf_Gapdh_5_at	CGGGAAACTTGTCATCAACGGGAAG
AFFX-Gga-r2-Bs-dap-3_at	GAACTCTCTTCTAACGGTACGGTCA	AFFX-Cf_Gapdh_5_at	TCCAGGAGCGAGATCCCGCCAACAT
AFFX-Gga-r2-Bs-dap-3_at	GAAGCAGCCCGCATATTAGGCGCAG	AFFX-Cf_Gapdh_5_at	AGATCCCGCCAACATCAAATGGGGT
AFFX-Gga-r2-Bs-dap-3_at	AGAATTCAGCTAACGCTTCCAGACC	AFFX-Cf_Gapdh_5_at	CATCAAATGGGGTGATGCTGGTGCT
AFFX-Gga-r2-Bs-dap-3_at	CAGACCGCGGCCTAATAATGAGTGA	AFFX-Cf_Gapdh_5_at	AGTCAACGGATTTGGCCGTATTGGG
AFFX-Gga-r2-Bs-dap-3_at	TTCGGTCAATTGTCACTGTCATCAG	AFFX-Cf_Gapdh_5_at	GTGCTGAGTATGTTGTGGAGTCCAC
AFFX-Gga-r2-Bs-dap-3_at	GAATCTGTCGGCCAAAAGCGGTTTT	AFFX-Cf_Gapdh_5_at	TATGTTGTGGAGTCCACTGGGGTCT
AFFX-Gga-r2-Bs-dap-3_at	GGATCACGGCAATGCGGCTGCACTG	AFFX-Cf_Gapdh_5_at	ATTTGGCCGTATTGGGCGCCTGGTC
AFFX-Gga-r2-Bs-dap-3_at	GAAGAAGCGATCTTTTCCGCCGGAA	AFFX-Cf_Gapdh_5_at	TATTGGGCGCCTGGTCACCAGGGCT
AFFX-Gga-r2-Bs-dap-3_at	GCCTTCCGGCGCATAAAGTCAGCAA	AFFX-Cf_Gapdh_5_at	AAAGTGGATATTGTCGCCATCAATG
AFFX-Gga-r2-Bs-dap-3_at	ATGGTTTTCATCAGCCGGATTTTGT	AFFX-Cf_Gapdh_5_at	GATATTGTCGCCATCAATGACCCCT
AFFX-Gga-r2-Bs-dap-3_at	CAAAAGCCAGTTTATCCCGTCAAAG	AFFX-Cf_Gapdh_5_at	GTCGCCATCAATGACCCCTTCATTG
AF243438.CDS27.S1_s_at	TATAGAAGTGTTCACGTCAGCTAGA	AFFX-r2-TagIN-M_at	TTATCGGGCCTGCTACATCAGTGGC
AF243438.CDS27.S1_s_at	TAGAAACGCCCATAGTGACTACAAA	AFFX-r2-TagIN-M_at	GTGGCGATGTTCGTAACCCTTAGCC
AF243438.CDS27.S1_s_at	AAGCACAGCTGCGTTCAAACATGAG	AFFX-r2-TagIN-M_at	CTTAGCCGATCTTCTTACTTACGAG
AF243438.CDS27.S1_s_at	AACATGAGACTCGAAGCGACCGATA	AFFX-r2-TagIN-M_at	GGCTCAGTGGTCCGACATAGTGCCC
AF243438.CDS27.S1_s_at	TAGATGAGCAGCTAGATCGCCGTCT	AFFX-r2-TagIN-M_at	GAGCCGATGGTCAGCAATAGCGCCT
AF243438.CDS27.S1_s_at	GATCGCCGTCTCATACTTGATATAA	AFFX-r2-TagIN-M_at	CACTATGCCACCTCTGGTCTAATAT
AF243438.CDS27.S1_s_at	TAGGAAATTGCTGAACCCCAAACTT	AFFX-r2-TagIN-M_at	TATAGCGCCCTGTGGTCGTATAATC
AF243438.CDS27.S1_s_at	GATCAGACCGAAGAAGCTATTCTCG	AFFX-r2-TagIN-M_at	ACTTCTCGGTATGTGTCCTCAATTA
AF243438.CDS27.S1_s_at	GGAGGACATTCTAGCACAAACCATT	AFFX-r2-TagIN-M_at	TCGCGGCTCACTAATTGTCTGCGGT
AF243438.CDS27.S1_s_at	TAACGATTCCATTACAAACACCGAT	AFFX-r2-TagIN-M_at	GATCCAGATCGCAGGGTATCGCATC
AF243438.CDS27.S1_s_at	GAATCCGAGGCTTTACTGACAAAAT	AFFX-r2-TagIN-M_at	TCGTCGTGACGAACGTGCTACTCGC
AF243438.CDS53.S1_s_at	GTTCATAGCTCTAATGCCTACAGCC	AFFX-Cf_Actin_5_s_at	CATGGGCCAGAAGGACTCCTACGTG
AF243438.CDS53.S1_s_at	TTTCACCCCTCTTCAGTAATATGTT	AFFX-Cf_Actin_5_s_at	ATGGGCCAGAAGGACTCCTACGTGG
AF243438.CDS53.S1_s_at	TACGGGAGAATTGTTGCGCCCCAAT	AFFX-Cf_Actin_5_s_at	GCCAGAAGGACTCCTACGTGGGCGA
AF243438.CDS53.S1_s_at	GTTGCGCCCCAATATTCAGTTAATG	AFFX-Cf_Actin_5_s_at	GAGCACGGCATCGTCACCAACTGGG
AF243438.CDS53.S1_s_at	ACGATTGGCCACAATTGCCGCATTA	AFFX-Cf_Actin_5_s_at	CACGGCATCGTCACCAACTGGGACG
AF243438.CDS53.S1_s_at	ATACAAAACCGCCTTCGACTATGAC	AFFX-Cf_Actin_5_s_at	ACGGCATCGTCACCAACTGGGACGA
AF243438.CDS53.S1_s_at	AAGCCCTCCTAATTGATCTATGCAG	AFFX-Cf_Actin_5_s_at	CGGCATCGTCACCAACTGGGACGAC
AF243438.CDS53.S1_s_at	GATAGGGCACCATTTGTGGACCAGA	AFFX-Cf_Actin_5_s_at	GGCATCGTCACCAACTGGGACGACA
AF243438.CDS53.S1_s_at	GTCGATGACTCTGTTTATCACGGAA	AFFX-Cf_Actin_5_s_at	TCACCAACTGGGACGACATGGAGAA
AF243438.CDS53.S1_s_at	AACCGCTGACGGTACGTTGTTGGCA	AFFX-Cf_Actin_5_s_at	ACCAACTGGGACGACATGGAGAAGA
AF243438.CDS53.S1_s_at	ACGGAGAATTGACCTGCTCGTCGTG	AFFX-Cf_Actin_5_s_at	CAACTGGGACGACATGGAGAAGATC
AFFX-Gga-actin-M_at	ACAGTGCTGTCTGGTGGTACCACAA	AFFX-Cf_Actin_5_s_at	AACTGGGACGACATGGAGAAGATCT
AFFX-Gga-actin-M_at	GCCCTGGCACCTAGCACAATGAAAA	AFFX-Cf_Actin_5_s_at	GAAGATCTGGCACCACACCTTCTAC
AFFX-Gga-actin-M_at	GAGATGGCCACAGCTGCCTCTAGCT	AFFX-Cf_Actin_5_s_at	ACACCTTCTACAACGAGCTGCGCGT
AFFX-Gga-actin-M_at	GCCTCTAGCTCTTCCCTGGAGAAGA	AFFX-Cf_Actin_5_s_at	ACCTTCTACAACGAGCTGCGCGTGG
AFFX-Gga-actin-M_at	GAGCTATGAACTCCCTGATGGTCAG	AFFX-Cf_Actin_5_s_at	CTTCTACAACGAGCTGCGCGTGGCC
AFFX-Gga-actin-M_at	AACTCCCTGATGGTCAGGTCATCAC	AFFX-BioC-5_at	TACTGGCAATGCTTCCACAGCGTAA
AFFX-Gga-actin-M_at	GTCATCACCATTGGCAATGAGAGGT	AFFX-BioC-5_at	GGGTTGTGGACCTGGCTGGATGAGC
AFFX-Gga-actin-M_at	ATGAGAGGTTCAGGTGCCCCGAGGC	AFFX-BioC-5_at	TGAGCCGCCACTGGCGGGAACGTCA
AFFX-Gga-actin-M_at	TTCCAGCCATCTTTCTTGGGTATGG	AFFX-BioC-5_at	GCGCAGGTGACGGCCTTAGATCTCT
AFFX-Gga-actin-M_at	ATCTTTCTTGGGTATGGAGTCCTGT	AFFX-BioC-5_at	GCCTTAGATCTCTCGCCGCCAATGC
AFFX-Gga-actin-M_at	GGAGTCCTGTGGTATCCATGAAACT	AFFX-BioC-5_at	GCCGCCAATGCTTGTTCAGGCACGC
AFFX-r2-Ec-bioB-3_at	TGCCAACCTCTTACGTGCGCCTTTC	AFFX-BioC-5_at	TGTTCAGGCACGCCAGAAGGATGCC
AFFX-r2-Ec-bioB-3_at	CAACCTCTTACGTGCGCCTTTCTGC	AFFX-BioC-5_at	AGAAGGATGCCGCAGACCATTATCT
AFFX-r2-Ec-bioB-3_at	GAACAGACTCAGGCGATGTGCTTTA	AFFX-BioC-5_at	GCCGCAGACCATTATCTGGCGGGAG
AFFX-r2-Ec-bioB-3_at	AGACTCAGGCGATGTGCTTTATGGC	AFFX-BioC-5_at	CGTTAGCGACTGCGACGTTCGATCT
AFFX-r2-Ec-bioB-3_at	TATGGCAGGCGCAAACTCGATTTTC	AFFX-BioC-5_at	CGACGTTCGATCTTGCATGGAGCAA
AFFX-r2-Ec-bioB-3_at	GCAAACTCGATTTTCTACGGTTGCA	AFFX-BioC-5_at	GATCTTGCATGGAGCAATCTCGCAG
AFFX-r2-Ec-bioB-3_at	TTTCTACGGTTGCAAACTGCTGACC	AFFX-BioC-5_at	CAATCTCGCAGTGCAGTGGTGCGGT
AFFX-r2-Ec-bioB-3_at	GCAAACTGGGGCTAAATCCGCAGCA	AFFX-BioC-5_at	ATTTATCCACGGCACTCCGCGAGCT
AFFX-r2-Ec-bioB-3_at	ACTGGGGCTAAATCCGCAGCAAACT	AFFX-BioC-5_at	CAGCGGCATTTGGTCGGGCAGCCGC
AFFX-r2-Ec-bioB-3_at	GGGATAACGAACAACAGCAACGTCT	AFFX-BioC-5_at	GTCGGGCAGCCGCACACTATGAGCA
AFFX-r2-Ec-bioB-3_at	ACAACAGCAACGTCTTGAACAGGCG	AFFX-BioC-5_at	CGCACACTATGAGCAACATGCAGAT
AFFX-Gga-r2-Bs-phe-5_at	GATTCAGTAGCAGATGCCGTTCAAA	AFFX-BioC-5_at	AACATGCAGATCTACAGCGCCAGAG
AFFX-Gga-r2-Bs-phe-5_at	GATGCCGTTCAAAAGGTCGATTTAA	AFFX-BioC-5_at	TACAGCGCCAGAGTGCTGACGCCTT
AFFX-Gga-r2-Bs-phe-5_at	AGGGATGCTGTTTTTCCATTCTACA	AFFX-BioC-5_at	GAGTGCTGACGCCTTACTGGCAATG
AFFX-Gga-r2-Bs-phe-5_at	AATTATCACACTTTTCTTTCATTTG	AFFX-r2-Ec-bioD-5_at	CCTCTGGCAGCGAAAAGACCCCGGA
AFFX-Gga-r2-Bs-phe-5_at	GGATAGGTCAGGTGCGTTATCTCAG	AFFX-r2-Ec-bioD-5_at	CTGGCAGCGAAAAGACCCCGGAAGG
AFFX-Gga-r2-Bs-phe-5_at	GTTATCTCAGCTTCTTCAGGCGGTA	AFFX-r2-Ec-bioD-5_at	AGCCTGCAGCTGGATTACGCAACAG
AFFX-Gga-r2-Bs-phe-5_at	CTTCAGGCGGTAGCTGATTCTGGAA	AFFX-r2-Ec-bioD-5_at	CCTGCAGCTGGATTACGCAACAGTA
AFFX-Gga-r2-Bs-phe-5_at	GAAGCAACGTTCTTTCCATTCACCA	AFFX-r2-Ec-bioD-5_at	ACGCAACAGTAAATCCTTACACCTT
AFFX-Gga-r2-Bs-phe-5_at	AGACCATTCCGCTTCAAGGCAGAGC	AFFX-r2-Ec-bioD-5_at	CGCAACAGTAAATCCTTACACCTTC
AFFX-Gga-r2-Bs-phe-5_at	AGGCAGAGCAAATGTGACACTGTCT	AFFX-r2-Ec-bioD-5_at	GTAAATCCTTACACCTTCGCAGAAC
AFFX-Gga-r2-Bs-phe-5_at	ACTGTCTATCAGTACGTCGGCAATG	AFFX-r2-Ec-bioD-5_at	CTTACACCTTCGCAGAACCCACTTC
AF004857.CDS1.S1_s_at	GCGGGTGGTGGTTTCTTATTAATTG	AFFX-r2-Ec-bioD-5_at	GGGCAGACCGATAGAATCATTGGTA
AF004857.CDS1.S1_s_at	ATTGTTATCATTTTCGCTCTTCTAT	AFFX-r2-Ec-bioD-5_at	GAATCATTGGTAATGAGCGCCGGAT
AF004857.CDS1.S1_s_at	ATTTTCGCTCTTCTATACTGTTGTA	AFFX-r2-Ec-bioD-5_at	GCAGCAGGCTACCGGACGGCAGGTT
AF004857.CDS1.S1_s_at	CGCTCTTCTATACTGTTGTAAGGCT	AFFX-Cfa-TrpnX-5_at	AGAACGGTGTTGCATCGATACAGGC
AF004857.CDS1.S1_s_at	CCATCGTGAGCTGGTAGCGTTGAGT	AFFX-Cfa-TrpnX-5_at	GCAGGTGCTGGCATTGTTGCTGATT
AF004857.CDS1.S1_s_at	GTAGCGTTGAGTTCTGGTAAGCACA	AFFX-Cfa-TrpnX-5_at	TGCTGATTCTGTTCCGGAAGCCGAA
AF004857.CDS1.S1_s_at	TGTAACGGTGCGACTGCTGTATTTG	AFFX-Cfa-TrpnX-5_at	AAAGCCGGTGCGCTGCTGAAAACGA
AF004857.CDS1.S1_s_at	GTGCGACTGCTGTATTTGGTAACGT	AFFX-Cfa-TrpnX-5_at	AAAACCCTTACTGCCGGTGAGGCTG
AF004857.CDS1.S1_s_at	CTGTATTTGGTAACGTTCATTGTCA	AFFX-Cfa-TrpnX-5_at	GCAGCGGAAATGACTCCTTCTGAAA
AF004857.CDS1.S1_s_at	CACGGCAGGTGGTGATTTGCAAGCT	AFFX-Cfa-TrpnX-5_at	GATATTGTCAATTCTTGCTCATCGG
AF004857.CDS1.S1_s_at	TGGTGATTTGCAAGCTACGTCATCC	AFFX-Cfa-TrpnX-5_at	GGCACACGCTCTTACAGTCGATGGA
AF176592.CDS2.S1_s_at	GAATTGGTAGACATAATTTCCACTG	AFFX-Cfa-TrpnX-5_at	ACTTTTAATATCTCAACGGCCTCGG
AF176592.CDS2.S1_s_at	TGGTAGACATAATTTCCACTGAAAT	AFFX-Cfa-TrpnX-5_at	AATCGCTAAGCATGGCAATCGCTCT
AF176592.CDS2.S1_s_at	ACTGAAATAGTTAAAGTGCATGCTA	AFFX-Cfa-TrpnX-5_at	GCAATCGCTCTGTCTCTTCTAAAAG
AF176592.CDS2.S1_s_at	ATAGTTAAAGTGCATGCTAATATAT	Cfa.10013.1.A1_at	TTTTCTGTGCCAGACTTTTGACTTT
AF176592.CDS2.S1_s_at	AATATATTCAAATGTAGGCTAGAGG	Cfa.10013.1.A1_at	GACTGAACTGTATCTCCTTTTATTA
AF176592.CDS2.S1_s_at	GTAGGCTAGAGGATATTGAAATCAT	Cfa.10013.1.A1_at	ATTAATTTTTCCCTGTGTCGTGATA
AF176592.CDS2.S1_s_at	GCAAACTCTGATTAAATGCGGAGAA	Cfa.10013.1.A1_at	GTTTGCCAGCATTCAGTACTGTGTT
AF176592.CDS2.S1_s_at	AATGCGGAGAACATGGCCTGATCTT	Cfa.10013.1.A1_at	GTCCAGATGTAGGTTTTTATGCTCA
AF176592.CDS2.S1_s_at	TGCGGAGAACATGGCCTGATCTTCC	Cfa.10013.1.A1_at	TATTTCTTGTACCTTGCAGCATGCT
AF176592.CDS2.S1_s_at	GAACATGGCCTGATCTTCCTGAAGA	Cfa.10013.1.A1_at	TGCTCTATGCATTCAGTCCTTAAGG
AF176592.CDS2.S1_s_at	GAAATTAGATGATATGGTATGGACT	Cfa.10013.1.A1_at	CAAACTGTGCGCCTGTAAGGTTTAT
AFFX-Gga-gapdh-3_x_at	ATTCCTCCACCTTTGATGCGGGTGC	Cfa.10013.1.A1_at	AATCTGCTCAGTTCCATATTTCATC
AFFX-Gga-gapdh-3_x_at	GCTGGCATTGCACTGAATGACCATT	Cfa.10013.1.A1_at	ATTTCATCCATGAGAATCCTGCAAT
AFFX-Gga-gapdh-3_x_at	ATTTCGTCAAGCTTGTTTCCTGGTA	Cfa.10013.1.A1_at	AGCTGTGTTTTCTGATGAGTACTGA
AFFX-Gga-gapdh-3_x_at	GTTTGGATACAGCAACCGTGTTGTG	AFFX-Cfa-actin-5_at	AGACCGCGTCCACCCCGCGAGCACA
AFFX-Gga-gapdh-3_x_at	AGCAACCGTGTTGTGGACTTGATGG	AFFX-Cfa-actin-5_at	GACCGCGTCCACCCCGCGAGCACAG
AFFX-Gga-gapdh-3_x_at	GACTTGATGGTCCACATGGCATCCA	AFFX-Cfa-actin-5_at	ACCGCGTCCACCCCGCGAGCACAGG
AFFX-Gga-gapdh-3_x_at	ATCCAAGGAGTGAGCCAGGCACACA	AFFX-Cfa-actin-5_at	CCGCGTCCACCCCGCGAGCACAGGC
AFFX-Gga-gapdh-3_x_at	GAAGCAGGACCCTTTGTTGGAGCCC	AFFX-Cfa-actin-5_at	GTCCACCCCGCGAGCACAGGCCCCT
AFFX-Gga-gapdh-3_x_at	ACCGCTCAGTTCTGCATCCTGCAGT	AFFX-Cfa-actin-5_at	TCCACCCCGCGAGCACAGGCCCCTC
AFFX-Gga-gapdh-3_x_at	CCCTGAAGGGCATCCTAGGATACAC	AFFX-Cfa-actin-5_at	CCACCCCGCGAGCACAGGCCCCTCG
AFFX-Gga-gapdh-3_x_at	GTCTCCTGTGACTTCAATGGTGACA	AFFX-Cfa-actin-5_at	CACCCCGCGAGCACAGGCCCCTCGC
AF243438.CDS56.S1_s_at	CGCATCAGCGAATATTTCCCCAAAG	AFFX-Cfa-actin-5_at	ACCCCGCGAGCACAGGCCCCTCGCC
AF243438.CDS56.S1_s_at	AAAGTATCAAATATCGGCTCCCGGA	AFFX-Cfa-actin-5_at	CCCGCGAGCACAGGCCCCTCGCCCT
AF243438.CDS56.S1_s_at	GAAGCGCAATGGTCCAATATCCCTA	AFFX-Cfa-actin-5_at	GCGAGCACAGGCCCCTCGCCCTCGC
AF243438.CDS56.S1_s_at	TGCAACAAGTCATGCTTCGTCAGCC	Cfa.10016.1.A1_at	AAAGGCCCTGCTTAGTCAGTGTACA
AF243438.CDS56.S1_s_at	CAGCCCTCATCGTGGCATGTGGGAA	Cfa.10016.1.A1_at	AAAGCCACTTCCTTGTACACAGAGT
AF243438.CDS56.S1_s_at	CTGCATACGGCAGCGGGAAACCTTT	Cfa.10016.1.A1_at	TGAGCAGGGACAGCGCCAGGCATCT
AF243438.CDS56.S1_s_at	AAACCTTTCTGCCTTGCACTGGAAG	Cfa.10016.1.A1_at	AGGCATCTCCCTGTAAAGGCACCTG
AF243438.CDS56.S1_s_at	AACGTGTGATCCACCGATGCTGTGT	Cfa.10016.1.A1_at	AAGGCACCTGCCGATGAGGATTTGA
AF243438.CDS56.S1_s_at	GATGCTGTGTGTACGTCCGCACGTG	Cfa.10016.1.A1_at	AAAGGGAAACCTCTCATGCAGTCTC
AF243438.CDS56.S1_s_at	ACGTGTTTGGAAGTCCCACGGCATT	Cfa.10016.1.A1_at	GGCTCTTCGTCCAGGGTATGCTTAG
AF243438.CDS56.S1_s_at	CACGGCATTCCTGTTTTGCAATTCA	Cfa.10016.1.A1_at	GTATGCTTAGGCCACACACGATGCT
AFFX-Gga-r2-Ec-bioC-5_at	CTGGCAATGCTTCCACAGCGTAAAT	Cfa.10016.1.A1_at	AAAGCTATTTGCCACAGTCCTGTTA
AFFX-Gga-r2-Ec-bioC-5_at	GCAGGTGACGGCCTTAGATCTCTCG	Cfa.10016.1.A1_at	AAGTCCTTTTGCAGTCTGGTGTGCA
AFFX-Gga-r2-Ec-bioC-5_at	CAATGCTTGTTCAGGCACGCCAGAA	Cfa.10016.1.A1_at	TGATCAGGACAGCTTTTCCACCTTA
AFFX-Gga-r2-Ec-bioC-5_at	AGGATGCCGCAGACCATTATCTGGC	AFFX-Cfa-r2-Bs-dap-3_at	GAACTCTCTTCTAACGGTACGGTCA
AFFX-Gga-r2-Ec-bioC-5_at	GGAGATATCGAATCCCTGCCGTTAG	AFFX-Cfa-r2-Bs-dap-3_at	GAAGCAGCCCGCATATTAGGCGCAG
AFFX-Gga-r2-Ec-bioC-5_at	TGCCGTTAGCGACTGCGACGTTCGA	AFFX-Cfa-r2-Bs-dap-3_at	AGAATTCAGCTAACGCTTCCAGACC
AFFX-Gga-r2-Ec-bioC-5_at	GCGACGTTCGATCTTGCATGGAGCA	AFFX-Cfa-r2-Bs-dap-3_at	CAGACCGCGGCCTAATAATGAGTGA
AFFX-Gga-r2-Ec-bioC-5_at	GCATGGAGCAATCTCGCAGTGCAGT	AFFX-Cfa-r2-Bs-dap-3_at	TTCGGTCAATTGTCACTGTCATCAG
AFFX-Gga-r2-Ec-bioC-5_at	TGCGGTAATTTATCCACGGCACTCC	AFFX-Cfa-r2-Bs-dap-3_at	AAAAGGATCGCCATCCGGATCACGG
AFFX-Gga-r2-Ec-bioC-5_at	TGCAGATCTACAGCGCCAGAGTGCT	AFFX-Cfa-r2-Bs-dap-3_at	GGATCACGGCAATGCGGCTGCACTG
AFFX-Gga-r2-Ec-bioC-5_at	GAGTGCTGACGCCTTACTGGCAATG	AFFX-Cfa-r2-Bs-dap-3_at	GAAGAAGCGATCTTTTCCGCCGGAA
AFFX-Gga-r2-Bs-lys-5_at	AAATCGGAGGTGTGGATGCTCTCTA	AFFX-Cfa-r2-Bs-dap-3_at	GCCTTCCGGCGCATAAAGTCAGCAA
AFFX-Gga-r2-Bs-lys-5_at	GGATGCTCTCTATTTAGCGGAGAAA	AFFX-Cfa-r2-Bs-dap-3_at	ATGGTTTTCATCAGCCGGATTTTGT
AFFX-Gga-r2-Bs-lys-5_at	ATGGTACACCTCTTTACGTATATGA	AFFX-Cfa-r2-Bs-dap-3_at	CAAAAGCCAGTTTATCCCGTCAAAG
AFFX-Gga-r2-Bs-lys-5_at	GTGGCTTTAATACGTGAGCGTGCTA	Cfa.1007.1.S1_at	GTACAACTGACATAAACTTGCTGTT
AFFX-Gga-r2-Bs-lys-5_at	AAGCTTTAAGCAGGCGTTTATTTCT	Cfa.1007.1.S1_at	AACTTGCTGTTTTACTTCTGAAACA
AFFX-Gga-r2-Bs-lys-5_at	AGGCGTTTATTTCTGCAGGGCTGAA	Cfa.1007.1.S1_at	TTAAAGCTTTTCTCTATTTATGAGC
AFFX-Gga-r2-Bs-lys-5_at	CACAGGTGGCATATGCGAGCAAAGC	Cfa.1007.1.S1_at	CTAGCATTCTCCTCGGTGGTTTCAA
AFFX-Gga-r2-Bs-lys-5_at	GCAAAGCATTCTCATCAGTCGCAAT	Cfa.1007.1.S1_at	GGTTTCAAATCATTGCGCTACCTGA
AFFX-Gga-r2-Bs-lys-5_at	AGTCGCAATGATTCAGCTCGCTGAG	Cfa.1007.1.S1_at	TCATTGCGCTACCTGAAAAGTTTTT
AFFX-Gga-r2-Bs-lys-5_at	ACTTTCTTTAGATGTCGTATCCGGA	Cfa.1007.1.S1_at	TAGGTTGTTTTGTCCACCAGCATTT
AFFX-Gga-r2-Bs-lys-5_at	GAGAGCTATATACGGCTGTTGCAGC	Cfa.1007.1.S1_at	AAGTGATTTTTATACCTGGGCATTG
AFFX-Gga-gapdh-3_a_at	GTTTGGATACAGCAACCGTGTTGTG	Cfa.1007.1.S1_at	GACCTATACTTAAATTACTGGCTGG
AFFX-Gga-gapdh-3_a_at	TTGGATACAGCAACCGTGTTGTGGA	Cfa.1007.1.S1_at	TACTGGCTGGCTTTAGATGTCTTCA
AFFX-Gga-gapdh-3_a_at	GATACAGCAACCGTGTTGTGGACTT	Cfa.1007.1.S1_at	GTGATCACTTTCTTGCACTGTGAAG
AFFX-Gga-gapdh-3_a_at	ACAGCAACCGTGTTGTGGACTTGAT	Cfa.10052.1.S1_at	GAAACGTGGGTACAGAAATTGCCTG
AFFX-Gga-gapdh-3_a_at	AGCAACCGTGTTGTGGACTTGATGG	Cfa.10052.1.S1_at	TACAGAAATTGCCTGTTGGCCTCAT
AFFX-Gga-gapdh-3_a_at	CAACCGTGTTGTGGACTTGATGGTC	Cfa.10052.1.S1_at	AGAAATTGCCTGTTGGCCTCATGCA
AFFX-Gga-gapdh-3_a_at	ACCGTGTTGTGGACTTGATGGTCCA	Cfa.10052.1.S1_at	GAAATTGCCTGTTGGCCTCATGCAG
AFFX-Gga-gapdh-3_a_at	CGTGTTGTGGACTTGATGGTCCACA	Cfa.10052.1.S1_at	AAATTGCCTGTTGGCCTCATGCAGG
AFFX-Gga-gapdh-3_a_at	TTGTCTCCTGTGACTTCAATGGTGA	Cfa.10052.1.S1_at	CTGGAGGATCGGGTGGCTCACACAA
AFFX-Gga-gapdh-3_a_at	GTCTCCTGTGACTTCAATGGTGACA	Cfa.10052.1.S1_at	AGGATCGGGTGGCTCACACAAGCAA
AFFX-Gga-gapdh-3_a_at	CTCCTGTGACTTCAATGGTGACAGC	Cfa.10052.1.S1_at	CCAGCCTAGCTGAGGCATACACTGA
AFFX-Gga-ef1a-M_s_at	GAGATCGTCAAGGAAGTCAGCACTT	Cfa.10052.1.S1_at	TAGCTGAGGCATACACTGAGACCCA
AFFX-Gga-ef1a-M_s_at	AATTGGCTACAACCCAGACACTGTA	Cfa.10052.1.S1_at	GCTGAGGCATACACTGAGACCCAGT
AFFX-Gga-ef1a-M_s_at	GACACTGTAGCTTTTGTGCCAATCT	Cfa.10052.1.S1_at	TGAGGCATACACTGAGACCCAGTGA
AFFX-Gga-ef1a-M_s_at	TTGTGCCAATCTCTGGTTGGAACGG	AFFX-Cfa-r2-Bs-phe-5_at	GATTCAGTAGCAGATGCCGTTCAAA
AFFX-Gga-ef1a-M_s_at	ACATGCTGGAGCCTAGCTCTAACAT	AFFX-Cfa-r2-Bs-phe-5_at	GATGCCGTTCAAAAGGTCGATTTAA
AFFX-Gga-ef1a-M_s_at	TAGCTCTAACATGCCCTGGTTCAAG	AFFX-Cfa-r2-Bs-phe-5_at	AGGGATGCTGTTTTTCCATTCTACA
AFFX-Gga-ef1a-M_s_at	GAAGGTTACCCGGAAAGATGGCAAT	AFFX-Cfa-r2-Bs-phe-5_at	TCACACTTTTCTTTCATTTGGAGGA
AFFX-Gga-ef1a-M_s_at	ATGGCAATGCCAGTGGAACCACCCT	AFFX-Cfa-r2-Bs-phe-5_at	TAGGTCAGGTGCGTTATCTCAGCTT
AFFX-Gga-ef1a-M_s_at	TCCTGGAAGCCTTGGACTGCATCCT	AFFX-Cfa-r2-Bs-phe-5_at	TTATCTCAGCTTCTTCAGGCGGTAG
AFFX-Gga-ef1a-M_s_at	GTCTGCCTCTTCAAGATGTCTACAA	AFFX-Cfa-r2-Bs-phe-5_at	CTTCAGGCGGTAGCTGATTCTGGAA
AFFX-Gga-ef1a-M_s_at	TTGGTACTGTACCAGTTGGCCGTGT	AFFX-Cfa-r2-Bs-phe-5_at	GAAGCAACGTTCTTTCCATTCACCA
AFFX-BioC-5_at	TACTGGCAATGCTTCCACAGCGTAA	AFFX-Cfa-r2-Bs-phe-5_at	AGACCATTCCGCTTCAAGGCAGAGC
AFFX-BioC-5_at	GGGTTGTGGACCTGGCTGGATGAGC	AFFX-Cfa-r2-Bs-phe-5_at	AGGCAGAGCAAATGTGACACTGTCT
AFFX-BioC-5_at	TGAGCCGCCACTGGCGGGAACGTCA	AFFX-Cfa-r2-Bs-phe-5_at	ACTGTCTATCAGTACGTCGGCAATG
AFFX-BioC-5_at	GCGCAGGTGACGGCCTTAGATCTCT	AFFX-PheX-M_at	GAAATATTAGGTTCAGGTGCATAAG
AFFX-BioC-5_at	GCCTTAGATCTCTCGCCGCCAATGC	AFFX-PheX-M_at	TTATTTAGGTCCAGCAGCTACATTT
AFFX-BioC-5_at	GCCGCCAATGCTTGTTCAGGCACGC	AFFX-PheX-M_at	AGGTCCAGCAGCTACATTTACACAT
AFFX-BioC-5_at	TGTTCAGGCACGCCAGAAGGATGCC	AFFX-PheX-M_at	GCTACATTTACACATCTAGCAGTCA
AFFX-BioC-5_at	AGAAGGATGCCGCAGACCATTATCT	AFFX-PheX-M_at	TACACATCTAGCAGTCAGTTCTTGT
AFFX-BioC-5_at	GCCGCAGACCATTATCTGGCGGGAG	AFFX-PheX-M_at	TCAAAACGGCGCCGAACATGTTGCT
AFFX-BioC-5_at	CGTTAGCGACTGCGACGTTCGATCT	AFFX-PheX-M_at	CGAACATGTTGCTTACCGCACCATT
AFFX-BioC-5_at	CGACGTTCGATCTTGCATGGAGCAA	AFFX-PheX-M_at	CCGCACCATTCCGGAGTGTATAGAT
AFFX-BioC-5_at	GATCTTGCATGGAGCAATCTCGCAG	AFFX-PheX-M_at	GTGTATAGATGCAGCCGTTGCAGGC
AFFX-BioC-5_at	CAATCTCGCAGTGCAGTGGTGCGGT	AFFX-PheX-M_at	GATGCAGCCGTTGCAGGCGAAGTTG
AFFX-BioC-5_at	ATTTATCCACGGCACTCCGCGAGCT	AFFX-PheX-M_at	CTATTTAATACATGAACAGCCTTTG
AFFX-BioC-5_at	CAGCGGCATTTGGTCGGGCAGCCGC	AFFX-PheX-M_at	CATGAACAGCCTTTGCCAATCGTGG
AFFX-BioC-5_at	GTCGGGCAGCCGCACACTATGAGCA	AFFX-PheX-M_at	GGGTGAAATGACGTTGCCGATTCAC
AFFX-BioC-5_at	CGCACACTATGAGCAACATGCAGAT	AFFX-PheX-M_at	GACGTTGCCGATTCACCAGCACTTG
AFFX-BioC-5_at	AACATGCAGATCTACAGCGCCAGAG	AFFX-PheX-M_at	CACTTGCTCGTCCATCCCTCAAGAG
AFFX-BioC-5_at	TACAGCGCCAGAGTGCTGACGCCTT	AFFX-PheX-M_at	GAGCTCGACAAAATTTACTCACATT
AFFX-BioC-5_at	GAGTGCTGACGCCTTACTGGCAATG	AFFX-PheX-M_at	AATTTACTCACATTCACACGCGATT
AF243438.CDS69.S1_s_at	TTACGCCTAGTAAATCATGACCCGA	AFFX-PheX-M_at	TCACATTCACACGCGATTGCGCAAT
AF243438.CDS69.S1_s_at	ATGACCCGATTTTTAAGACCGCTGG	AFFX-PheX-M_at	ACACGCGATTGCGCAATGCCATAAA
AF243438.CDS69.S1_s_at	TCAGGCTGAAGCTCGCACCAATAAT	AFFX-PheX-M_at	ATTGCGCAATGCCATAAATTTCTTC
AF243438.CDS69.S1_s_at	AAACGATTCCTTAACTCTGTGCTTA	AFFX-Cfa-r2-Bs-thr-5_s_at	ACACCGGCGCTAACTTTACATGAAG
AF243438.CDS69.S1_s_at	GTGCTTAATTTTGTTATCGCGCATT	AFFX-Cfa-r2-Bs-thr-5_s_at	TATTCACCTGCCGAAGCTGTCTGAG
AF243438.CDS69.S1_s_at	GCATTCGTCGTGTGATGCATCGCAC	AFFX-Cfa-r2-Bs-thr-5_s_at	GAAGGCGTCAATCCTACGGGATCAT
AF243438.CDS69.S1_s_at	GAGATGTTCTGATCCCGCATGTAAC	AFFX-Cfa-r2-Bs-thr-5_s_at	AAATGCATTGTCATCATCCCGAACG
AF243438.CDS69.S1_s_at	GTAACTTGTATATCAGCTGCACACT	AFFX-Cfa-r2-Bs-thr-5_s_at	ACTCGCTCAAGCTGTCATGTACGGA
AF243438.CDS69.S1_s_at	GCTGCACACTCATGCCTATTTATAT	AFFX-Cfa-r2-Bs-thr-5_s_at	GACGGAAACTTTGACGATGCGCTTA
AF243438.CDS69.S1_s_at	TTGCATGCGGGTCCAGAGCTACGAA	AFFX-Cfa-r2-Bs-thr-5_s_at	AAAATTGTCCGTTCCATCTGTGAGA
AF243438.CDS69.S1_s_at	GTGAAAGTTTCATTGCCGCATTAGG	AFFX-Cfa-r2-Bs-thr-5_s_at	TGAGAAATCACCGATTGCCCTTGTC
AF243438.CDS95.S1_s_at	ACATAACTCCTTAGCACAATCCAAT	AFFX-Cfa-r2-Bs-thr-5_s_at	AAAACTGCTGCCTTCGAAGTGTGCG
AF243438.CDS95.S1_s_at	CAATGTTACTTCAAGCATGTCTGTA	AFFX-Cfa-r2-Bs-thr-5_s_at	GATGTTTTAGCGATCCCGGTCGGAA
AF243438.CDS95.S1_s_at	AAATGGACCTTCGATGCAGGCAGAG	AFFX-Cfa-r2-Bs-thr-5_s_at	GCTGGAAACATCACTGCGTACTGGA
AF243438.CDS95.S1_s_at	TTTATAAAGTTCGTAAGCCTGACCG	AFFX-r2-Bs-thr-5_s_at	GTAACAGATCAAACACCGGCGCTAA
AF243438.CDS95.S1_s_at	GTAAGCCTGACCGAAGTCGTGATTT	AFFX-r2-Bs-thr-5_s_at	GTCAACAGGTAACACTTCCGCTGCT
AF243438.CDS95.S1_s_at	CGAAGTCGTGATTTTTCATGGCAAA	AFFX-r2-Bs-thr-5_s_at	GCATATGCAGCCCGTGCTAACATGA
AF243438.CDS95.S1_s_at	GGCAAAATCTGAACTCCCATGGCAA	AFFX-r2-Bs-thr-5_s_at	GAAATGCATTGTCATCATCCCGAAC
AF243438.CDS95.S1_s_at	GGCAATAGTGGTCTACGTCGTGAAA	AFFX-r2-Bs-thr-5_s_at	AACTCGCTCAAGCTGTCATGTACGG
AF243438.CDS95.S1_s_at	AATATATACGTTCCTCTAAGAGGCG	AFFX-r2-Bs-thr-5_s_at	GACGGAAACTTTGACGATGCGCTTA
AF243438.CDS95.S1_s_at	ATATTCCCACAGACCGCAAATAAAG	AFFX-r2-Bs-thr-5_s_at	GATGCGCTTAAAATTGTCCGTTCCA
AF243438.CDS95.S1_s_at	AATCAATTGGCGCTGGTAACGGAAT	AFFX-r2-Bs-thr-5_s_at	GTCAACCCTTACCGCATTGAAGGCC
AF243438.CDS21.S1_s_at	AAACATGGTCTTTCTACTCTTCTGG	AFFX-r2-Bs-thr-5_s_at	AAACTGCTGCCTTCGAAGTGTGCGA
AF243438.CDS21.S1_s_at	TGAAGTGTTCGAAGAGCTGCTCTCC	AFFX-r2-Bs-thr-5_s_at	AGCGCCTGATGTTTTAGCGATCCCG
AF243438.CDS21.S1_s_at	AGCTGCTCTCCATAGCGTTTGATCA	AFFX-r2-Bs-thr-5_s_at	CAGGCCTTCCGAAAATGCGCGGCTT
AF243438.CDS21.S1_s_at	ATCACCGCAGTGATGTGTCCTTTTG	AFFX-r2-TagE_at	TACAGCTTACCTACTATGCGTGCAA
AF243438.CDS21.S1_s_at	GTCCTTTTGGAGCTGTCCTACAGAA	AFFX-r2-TagE_at	TTACCGAGCTGACGTCGCGTTAGAC
AF243438.CDS21.S1_s_at	GGCAGCAGCTAGATTTGATACCAGT	AFFX-r2-TagE_at	GCGTTAGACAGCTCATTCGTCACGT
AF243438.CDS21.S1_s_at	GGTTTCAATCGCGAGACTGTCCAAA	AFFX-r2-TagE_at	GTCGTCTAGCTTAATACCTCTGCGT
AF243438.CDS21.S1_s_at	ATAGTTTCTGTTACATGCTCTCTTT	AFFX-r2-TagE_at	GATCACGTTAGATCCACTGCGTCAC
AF243438.CDS21.S1_s_at	GAGAAATAATCCTTCCTGCCATAGA	AFFX-r2-TagE_at	TGCGTCACGTTACCTACATGATCGA
AF243438.CDS21.S1_s_at	ACCAATACTGGCTGCATTTTCTAGA	AFFX-r2-TagE_at	GAGTCCTGCACGTTAGAACACTGGC
AF243438.CDS21.S1_s_at	ATCAATGTTCTGTCTTCTAAATGGG	AFFX-r2-TagE_at	GGCGCGTTCGACATAATTGCCGACG
AFFX-r2-P1-cre-3_at	AAGATATCTCACGTACTGACGGTGG	AFFX-r2-TagE_at	AGTCACTCTCGACCTAGCGTAAGGA
AFFX-r2-P1-cre-3_at	GTTAATCCATATTGGCAGAACGAAA	AFFX-r2-TagE_at	TGCGAGGTTCGCTTACGTTGCATAG
AFFX-r2-P1-cre-3_at	AACGAAAACGCTGGTTAGCACCGCA	AFFX-r2-TagE_at	GGATCGCTTAACCTCTATGCGTACA
AFFX-r2-P1-cre-3_at	CGCTGGTTAGCACCGCAGGTGTAGA	Cfa.10055.1.A1_at	CCGTTTCCCTCATCGACATTTATAA
AFFX-r2-P1-cre-3_at	GGTCGAGCGATGGATTTCCGTCTCT	Cfa.10055.1.A1_at	GACATTTATAAAGCAGCGTTCCCTG
AFFX-r2-P1-cre-3_at	TAGCTGATGATCCGAATAACTACCT	Cfa.10055.1.A1_at	TTCAGTACATGTTAGACTCCCGCAT
AFFX-r2-P1-cre-3_at	ATGATCCGAATAACTACCTGTTTTG	Cfa.10055.1.A1_at	ATGTGTCTCCTGTGTAGACAGCCTG
AFFX-r2-P1-cre-3_at	ATAACTACCTGTTTTGCCGGGTCAG	Cfa.10055.1.A1_at	AGACAGCCTGCGGTGTCATCTGAGA
AFFX-r2-P1-cre-3_at	CTGTTTTGCCGGGTCAGAAAAAATG	Cfa.10055.1.A1_at	ATTAAACTAATAGCCACGCCACGCA
AFFX-r2-P1-cre-3_at	AAAAAATGGTGTTGCCGCGCCATCT	Cfa.10055.1.A1_at	TACTTCCAAGTGACAGCAGCTGACA
AFFX-r2-P1-cre-3_at	CCAGCTATCAACTCGCGCCCTGGAA	Cfa.10055.1.A1_at	GCAGCTGACAGTCTTTTCAAGTAGA
AFFX-r2-TagQ-3_at	GATTCGCACGACTTCAGAGGATGGC	Cfa.10055.1.A1_at	AAAGCATATGGCAACAGGTCTGAGA
AFFX-r2-TagQ-3_at	GTGATGTTCTCGGATCGACACTGCT	Cfa.10055.1.A1_at	GCAGCCGATGACTTGTTTGCTTTTT
AFFX-r2-TagQ-3_at	GACACTGCTGGTCTGCGAATGACTC	Cfa.10055.1.A1_at	TTCTGGGTGTTATCCAAGGCTGGTT
AFFX-r2-TagQ-3_at	GGATGCACGTTATCGTCGAGTGGCC	AFFX-r2-Ec-bioB-3_at	TGCCAACCTCTTACGTGCGCCTTTC
AFFX-r2-TagQ-3_at	GCGGCCTATGTCTCATTAGCGAGTC	AFFX-r2-Ec-bioB-3_at	CAACCTCTTACGTGCGCCTTTCTGC
AFFX-r2-TagQ-3_at	GTAGACCGACGTTATCGCGCTATAC	AFFX-r2-Ec-bioB-3_at	GAACAGACTCAGGCGATGTGCTTTA
AFFX-r2-TagQ-3_at	GCTATACCCGATGTCAACGCGAGTT	AFFX-r2-Ec-bioB-3_at	AGACTCAGGCGATGTGCTTTATGGC
AFFX-r2-TagQ-3_at	GTCAAGCGTGCTCCTACGTTAGTAT	AFFX-r2-Ec-bioB-3_at	TATGGCAGGCGCAAACTCGATTTTC
AFFX-r2-TagQ-3_at	GTATCAGTTTCCCTATTGGTACGTC	AFFX-r2-Ec-bioB-3_at	GCAAACTCGATTTTCTACGGTTGCA
AFFX-r2-TagQ-3_at	ATATGGGCTCGGTTGACCTCTATTG	AFFX-r2-Ec-bioB-3_at	TTTCTACGGTTGCAAACTGCTGACC
AFFX-r2-TagQ-3_at	TAGGCAAACGTCTGTCGGTCATGGC	AFFX-r2-Ec-bioB-3_at	GCAAACTGGGGCTAAATCCGCAGCA
AFFX-Gga-r2-Bs-thr-3_s_at	GAAGGACACCCGGACAATGCTGGCG	AFFX-r2-Ec-bioB-3_at	ACTGGGGCTAAATCCGCAGCAAACT
AFFX-Gga-r2-Bs-thr-3_s_at	GCGGACTTGTGATCGGCCTGCATGA	AFFX-r2-Ec-bioB-3_at	GGGATAACGAACAACAGCAACGTCT
AFFX-Gga-r2-Bs-thr-3_s_at	GACGTAGTCGTTGTCATTCCTTTTT	AFFX-r2-Ec-bioB-3_at	ACAACAGCAACGTCTTGAACAGGCG
AFFX-Gga-r2-Bs-thr-3_s_at	GAGACGCGAGAGACGTGCTTCCGAA	Cfa.10081.1.A1_at	AAAACTCCGGATGACCCAAGTATAG
AFFX-Gga-r2-Bs-thr-3_s_at	GAGTTTCCATATGCCGATGCCGTAA	Cfa.10081.1.A1_at	GATGACCCAAGTATAGCCACTTAGG
AFFX-Gga-r2-Bs-thr-3_s_at	ATATCCTCATTGCTGCGATCATGTC	Cfa.10081.1.A1_at	TATAGGGACGAGAGCTGGTCCTGCA
AFFX-Gga-r2-Bs-thr-3_s_at	GATCATGTCCAAGGATTGGCCGCTT	Cfa.10081.1.A1_at	TGCAGAGGAGGCTCTTTCACTTGGG
AFFX-Gga-r2-Bs-thr-3_s_at	AAGGATATGTTCCATCAGCCGTACC	Cfa.10081.1.A1_at	GTAACAGTCCACAGACAGACTCCTT
AFFX-Gga-r2-Bs-thr-3_s_at	GATGCTTGTGCCTGAGCTGTCAAAA	Cfa.10081.1.A1_at	TGCAGCTCGGACATCTTACAGAACG
AFFX-Gga-r2-Bs-thr-3_s_at	AAAGTAGAGCACGTCGCCGAGATGA	Cfa.10081.1.A1_at	AGAACGAGCAGCTTGACGCCTGTGG
AFFX-Gga-r2-Bs-thr-3_s_at	AAGGGCGCATATGGAACGGCTCTCA	Cfa.10081.1.A1_at	GGGACATTGCCTTCATCGTTCTGGC
AF243438.CDS98.S1_s_at	TGAAAACTACCACAAGCCGGGATTT	Cfa.10081.1.A1_at	ATCGTTCTGGCCTATTCAGCTTTGT
AF243438.CDS98.S1_s_at	ACAGAACAGTAGTATCGTCGACGAA	Cfa.10081.1.A1_at	TGTGTTTAGACAGCACTTGTGGCAA
AF243438.CDS98.S1_s_at	ATGAGGCTAGCGATTGGTCCAGCTC	Cfa.10081.1.A1_at	TGCTAAATGGGCCTGTCCTTAAAAA
AF243438.CDS98.S1_s_at	GGTCCAGCTCGTCCATTAAACGGAG	Cfa.10007.1.A1_s_at	TCCCACTAGGGCTTGTCTCTGTCCT
AF243438.CDS98.S1_s_at	TTTTACTCACATCGCTATCAATTGG	Cfa.10007.1.A1_s_at	TGTCTCTGTCCTCCCAGGATGCTGG
AF243438.CDS98.S1_s_at	TTAGGCGTAGGAGACGACGTCGCAC	Cfa.10007.1.A1_s_at	TGCCGGGTGACAGCTCGGTCCACGT
AF243438.CDS98.S1_s_at	ATATGACGCTACCAGGAAACGATCT	Cfa.10007.1.A1_s_at	GGTCCCTTCTGATCTGCACCCTGGT
AF243438.CDS98.S1_s_at	GATAATACATGCTCTGGTAACCAAG	Cfa.10007.1.A1_s_at	TTCTGATCTGCACCCTGGTGCCTGG
AF243438.CDS98.S1_s_at	GAATGGGTTCGGGTTATACCGCTTG	Cfa.10007.1.A1_s_at	CCATCTGTCTCCTGCATTTTTCTTT
AF243438.CDS98.S1_s_at	GAAACGCTTAGATTTATACCACTGA	Cfa.10007.1.A1_s_at	TCTTTCCTGCTGCTGTTTTGTAAAA
AF243438.CDS98.S1_s_at	GTGGCTTTATACAATGGACGTCCAA	Cfa.10007.1.A1_s_at	TTCCTGCTGCTGTTTTGTAAAAAGA
AFFX-r2-TagIN-3_at	TAGGTGGCTCTAATCTGCGTTGGTT	Cfa.10007.1.A1_s_at	ATAATTCTCTCATTTTTTGTAGGTC
AFFX-r2-TagIN-3_at	GTCGCTCACAGTGTCTGGTGTTCGA	Cfa.10007.1.A1_s_at	GGGAATGGTGCTGCCACTGACCTGG
AFFX-r2-TagIN-3_at	ATTCTCGGTGGTGCTCAGTACATCC	Cfa.10007.1.A1_s_at	TGTCTTGTCTGCTCCCACTAGGGCT
AFFX-r2-TagIN-3_at	ACATCCAGTGGTGAGTCGCTACATC	AFFX-ThrX-M_at	GTAAAGGCAGCCGAGGAATCCAATG
AFFX-r2-TagIN-3_at	AAACCTCTGGGCATCCGTATTAAGC	AFFX-ThrX-M_at	ACTGATGATGAAATCCTTCACGCAT
AFFX-r2-TagIN-3_at	GACATTCCTACGACTTATCAGCACG	AFFX-ThrX-M_at	ATCCTTCACGCATATCAGCTGATCG
AFFX-r2-TagIN-3_at	AGAGATGCTTAGTACGCCTTCGAAT	AFFX-ThrX-M_at	TATCAGCTGATCGCCCGTGTAGAAG
AFFX-r2-TagIN-3_at	GTAATGACGCTGCATCGCTCAGTAT	AFFX-ThrX-M_at	CAGAACCAGGTTCTTGCGCGTCTAT
AFFX-r2-TagIN-3_at	GACAGCAGCTCAGCATCTATGCATC	AFFX-ThrX-M_at	TGCGCGTCTATCGCAGGAGTGCTGA
AFFX-r2-TagIN-3_at	GCATCATGTGCCTCACTAGGACATC	AFFX-ThrX-M_at	AAGGCAGCAAGGTCGTAGCTGTGTT
AFFX-r2-TagIN-3_at	CTAGGACATCATGCTCGACTCTGAG	AFFX-ThrX-M_at	AAGATCCGAACACAGCGGTCGACAT
AF243438.CDS24.S1_s_at	GAACATTATGATACGGTCGACTTGG	AFFX-ThrX-M_at	GCGGTCGACATTTCAGAAATCAAGC
AF243438.CDS24.S1_s_at	TGATACGGTCGACTTGGATGATTTG	AFFX-ThrX-M_at	TCAGAAATCAAGCCTGTCACATTGC
AF243438.CDS24.S1_s_at	TTGGATGATTTGAGATGTTCCGATC	AFFX-ThrX-M_at	CCTGTCACATTGCCGACTGATGAAG
AF243438.CDS24.S1_s_at	GAGATGTTCCGATCCTCTCATGCAA	AFFX-ThrX-M_at	GACAGCATCCTTGAATATGTAAAAG
AF243438.CDS24.S1_s_at	TCCTCTCATGCAACCCAAGTTTGTA	AFFX-ThrX-M_at	ACGAAGCCGACATGCTGTTCTCTGT
AF243438.CDS24.S1_s_at	ATGCAACCCAAGTTTGTATTACTAA	AFFX-ThrX-M_at	TGCTGTTCTCTGTCACTGTTCCCGG
AF243438.CDS24.S1_s_at	GTATTTAACATACACACTTAGACGA	AFFX-ThrX-M_at	GCTTTGATTCAGTCGGAATGGCGCT
AF243438.CDS24.S1_s_at	ACACACTTAGACGATGTTGCAAGAA	AFFX-ThrX-M_at	TCGGAATGGCGCTCAGCAGATATTT
AF243438.CDS24.S1_s_at	GAAAAACACACTGACGACCGAATCT	AFFX-ThrX-M_at	CAGATATTTGAAGCTGACCGTCTTT
AF243438.CDS24.S1_s_at	GACGACCGAATCTGGAGAAGTAATC	AFFX-ThrX-M_at	TGACCGTCTTTGAAAGCGACAAATG
AF243438.CDS24.S1_s_at	GTAATCGAACTGGATGATGAACATT	AFFX-ThrX-M_at	CAGATAACCTGATCTACCAAGTGGC
AF243438.CDS50.S1_s_at	AAGCAAACATGGACGCGGGTACTAT	AFFX-ThrX-M_at	CTCCTGTCCATGTGAAGGTGTGGAG
AF243438.CDS50.S1_s_at	GATTATTCTTCTTTTTGGCCACCAT	AFFX-Cfa-r2-Bs-lys-5_at	AAATCGGAGGTGTGGATGCTCTCTA
AF243438.CDS50.S1_s_at	GGGCATGTTCTACGTCACCAAAAAC	AFFX-Cfa-r2-Bs-lys-5_at	GGATGCTCTCTATTTAGCGGAGAAA
AF243438.CDS50.S1_s_at	AACAGGCAACTGTCGCATACCCGAA	AFFX-Cfa-r2-Bs-lys-5_at	AATATGGTACACCTCTTTACGTATA
AF243438.CDS50.S1_s_at	AGACCCCTACAGGATTAGCACCTAA	AFFX-Cfa-r2-Bs-lys-5_at	GTGGCTTTAATACGTGAGCGTGCTA
AF243438.CDS50.S1_s_at	GATGCGCCATTCGTCTGAATCCGAA	AFFX-Cfa-r2-Bs-lys-5_at	AAGCTTTAAGCAGGCGTTTATTTCT
AF243438.CDS50.S1_s_at	GACATCATTAGATTCCGATTCGGAC	AFFX-Cfa-r2-Bs-lys-5_at	AGGCGTTTATTTCTGCAGGGCTGAA
AF243438.CDS50.S1_s_at	GATTCGGACGATTCGCATTTGCACG	AFFX-Cfa-r2-Bs-lys-5_at	AAGCACAGGTGGCATATGCGAGCAA
AF243438.CDS50.S1_s_at	ATTTGCACGTCTCTGGTAGTACCGA	AFFX-Cfa-r2-Bs-lys-5_at	GCAAAGCATTCTCATCAGTCGCAAT
AF243438.CDS50.S1_s_at	ATGGATCCAGTACATCTCGTGTGAT	AFFX-Cfa-r2-Bs-lys-5_at	AGTCGCAATGATTCAGCTCGCTGAG
AF243438.CDS50.S1_s_at	TCGTGTGATCCCTGCAGATGCATTA	AFFX-Cfa-r2-Bs-lys-5_at	ACTTTCTTTAGATGTCGTATCCGGA
AF059725.CDS1.S1_at	TGGCGCACGCCTCGAGATCAGAAAT	AFFX-Cfa-r2-Bs-lys-5_at	GAGAGCTATATACGGCTGTTGCAGC
AF059725.CDS1.S1_at	GGATCTGGTCGCGTACAAGTTTGTA	Cfa.10023.1.A1_at	CGCGGTGCATGCCTCTCTGGATAAA
AF059725.CDS1.S1_at	GTTTGTACTTCCTTACATGCTGGAC	Cfa.10023.1.A1_at	GTGCATGCCTCTCTGGATAAATTCC
AF059725.CDS1.S1_at	GACGGACGTCCGCAGATTGTTCTTC	Cfa.10023.1.A1_at	TGCCTCTCTGGATAAATTCCTTGCC
AF059725.CDS1.S1_at	GCTGACCAACACGAGCTTGCTTAAT	Cfa.10023.1.A1_at	TGGATAAATTCCTTGCCTCTGTGAG
AF059725.CDS1.S1_at	GAGCGATCAACGTATGACCCGTGAT	Cfa.10023.1.A1_at	GATAAATTCCTTGCCTCTGTGAGCA
AF059725.CDS1.S1_at	AATGAGCTCTCGTTCGCTTAATGAG	Cfa.10023.1.A1_at	ATTCCTTGCCTCTGTGAGCACCGTG
AF059725.CDS1.S1_at	AGTTGGATGCCCTAGCTGACGAGCG	Cfa.10023.1.A1_at	GTACCGTTAAGCTGCTTCTGCGGGG
AF059725.CDS1.S1_at	ACGAGCGTGTCGAGTCTCAGGCTAA	Cfa.10023.1.A1_at	GGGCTTGCTTCTGGCATGCCCTTCT
AF059725.CDS1.S1_at	AGATGTCTGCCTTTGTTCCAATTGA	Cfa.10023.1.A1_at	GAGCGACCTGCATGCCCACAAGCTG
AF059725.CDS1.S1_at	GAATCCAGGGCAAGTCGCATCTAAA	Cfa.10023.1.A1_at	GCATGCCCACAAGCTGCGTGTGGAT
AFFX-Gga-actin-5_a_at	CCCACAGCCAGCCATGGATGATGAT	Cfa.10023.1.A1_at	ACAAGCTGCGTGTGGATCCCCGTCA
AFFX-Gga-actin-5_a_at	ATATTGCTGCGCTCGTTGTTGACAA	AFFX-Cfa-ef1a-5_at	GAAACACTCTCCTAAAGTCACGACC
AFFX-Gga-actin-5_a_at	TGTTGACAATGGCTCCGGTATGTGC	AFFX-Cfa-ef1a-5_at	AAGAAGGGCCAGCAAGTTTCAGCCA
AFFX-Gga-actin-5_a_at	CGGTATGTGCAAGGCCGGTTTCGCC	AFFX-Cfa-ef1a-5_at	TAGACTAAGAGCCACAAGCAGCCAG
AFFX-Gga-actin-5_a_at	TGCTGTGTTCCCATCTATCGTGGGT	AFFX-Cfa-ef1a-5_at	TCCCAGACAAGACCATGCAGCAGTA
AFFX-Gga-actin-5_a_at	GTCGCCCCAGACATCAGGGTGTGAT	AFFX-Cfa-ef1a-5_at	GCAGCAGTACCTACAGAGCAGGCTT
AFFX-Gga-actin-5_a_at	ACAGCTACGTTGGTGATGAAGCCCA	AFFX-Cfa-ef1a-5_at	GCAGGCTTCAGAGACCTCGGACAGT
AFFX-Gga-actin-5_a_at	TGAACACGGTATTGTCACCAACTGG	AFFX-Cfa-ef1a-5_at	GACCTCGGACAGTCTTCATCTAGAG
AFFX-Gga-actin-5_a_at	ATGAGCTGAGAGTAGCCCCTGAGGA	AFFX-Cfa-ef1a-5_at	GCTGCGGAGAAATGGCCAACTGCGT
AFFX-Gga-actin-5_a_at	TACCACTGGTATTGTGATGGACTCT	AFFX-Cfa-ef1a-5_at	ATGGCCAACTGCGTAGAGACCGACT
AFFX-Gga-actin-5_a_at	GGTGATGGTGTTACCCACACTGTGC	AFFX-Cfa-ef1a-5_at	GAGACCGACTCAGACCTTAATGTGG
AFFX-PheX-M_at	GAAATATTAGGTTCAGGTGCATAAG	AFFX-Cfa-ef1a-5_at	AACTGAGCAGCTGCAACATGGCAAA
AFFX-PheX-M_at	TTATTTAGGTCCAGCAGCTACATTT	AFFX-TrpnX-5_at	CGGTGTTGCATCGATACAGGCAGGT
AFFX-PheX-M_at	AGGTCCAGCAGCTACATTTACACAT	AFFX-TrpnX-5_at	TACAGGCAGGTGCTGGCATTGTTGC
AFFX-PheX-M_at	GCTACATTTACACATCTAGCAGTCA	AFFX-TrpnX-5_at	CATTGTTGCTGATTCTGTTCCGGAA
AFFX-PheX-M_at	TACACATCTAGCAGTCAGTTCTTGT	AFFX-TrpnX-5_at	AAGCCGGTGCGCTGCTGAAAACGAT
AFFX-PheX-M_at	TCAAAACGGCGCCGAACATGTTGCT	AFFX-TrpnX-5_at	GAAAACGATTCATATTGCAGAAGAC
AFFX-PheX-M_at	CGAACATGTTGCTTACCGCACCATT	AFFX-TrpnX-5_at	CTGATGAACAGATTTCTACAATTGT
AFFX-PheX-M_at	CCGCACCATTCCGGAGTGTATAGAT	AFFX-TrpnX-5_at	TACTGCCGGTGAGGCTGAAACGCTG
AFFX-PheX-M_at	GTGTATAGATGCAGCCGTTGCAGGC	AFFX-TrpnX-5_at	TATGATGATGGCAGCGGAAATGACT
AFFX-PheX-M_at	GATGCAGCCGTTGCAGGCGAAGTTG	AFFX-TrpnX-5_at	GATATTGTCAATTCTTGCTCATCGG
AFFX-PheX-M_at	CTATTTAATACATGAACAGCCTTTG	AFFX-TrpnX-5_at	GTTTTGTGAAGGCAATGCGGGCACA
AFFX-PheX-M_at	CATGAACAGCCTTTGCCAATCGTGG	AFFX-TrpnX-5_at	CAATGCGGGCACACGCTCTTACAGT
AFFX-PheX-M_at	GGGTGAAATGACGTTGCCGATTCAC	AFFX-TrpnX-5_at	ACACGCTCTTACAGTCGATGGACTT
AFFX-PheX-M_at	GACGTTGCCGATTCACCAGCACTTG	AFFX-TrpnX-5_at	TGGACTTCCTGATATTGTTGATACA
AFFX-PheX-M_at	CACTTGCTCGTCCATCCCTCAAGAG	AFFX-TrpnX-5_at	TATCTCAACGGCCTCGGCAATTGTT
AFFX-PheX-M_at	GAGCTCGACAAAATTTACTCACATT	AFFX-TrpnX-5_at	CTCGGCAATTGTTGCCTCGGCAGCT
AFFX-PheX-M_at	AATTTACTCACATTCACACGCGATT	AFFX-TrpnX-5_at	GTTGCCTCGGCAGCTGGTGCGAAAA
AFFX-PheX-M_at	TCACATTCACACGCGATTGCGCAAT	AFFX-TrpnX-5_at	CGCTAAGCATGGCAATCGCTCTGTC
AFFX-PheX-M_at	ACACGCGATTGCGCAATGCCATAAA	AFFX-TrpnX-5_at	CAATCGCTCTGTCTCTTCTAAAAGC
AFFX-PheX-M_at	ATTGCGCAATGCCATAAATTTCTTC	AFFX-TrpnX-5_at	CTTGTATTACGATTCGCACGATGAG
AF243438.CDS63.S1_s_at	ATAAATTCGCTTTCAGTACGGCTCC	AFFX-TrpnX-5_at	GATTCGCACGATGAGTGTAAAGAAC
AF243438.CDS63.S1_s_at	CCTTCATCAGCATCTAGCACTTGGA	AFFX-r2-Bs-dap-3_at	GATTTGACAGAAGCGGAACTCTCTT
AF243438.CDS63.S1_s_at	CGGTTGCAACTGTGGCTCAATATCA	AFFX-r2-Bs-dap-3_at	GTACGGTCAGTTTGCGTAAAGAAGA
AF243438.CDS63.S1_s_at	GGCTCAATATCACGCATACCAAGGC	AFFX-r2-Bs-dap-3_at	GCTGAAGCAGCCCGCATATTAGGCG
AF243438.CDS63.S1_s_at	AAGATCCTCCGCGAACAAATGAAGA	AFFX-r2-Bs-dap-3_at	AAGAATTCAGCTAACGCTTCCAGAC
AF243438.CDS63.S1_s_at	GATGCATTTCTTTCCAGAGCTGTCA	AFFX-r2-Bs-dap-3_at	CAATTCGGTCAATTGTCACTGTCAT
AF243438.CDS63.S1_s_at	AACCTGTGCCCGCAAACTATTGGAA	AFFX-r2-Bs-dap-3_at	GAAGCGATCTTTTCCGCCGGAATCC
AF243438.CDS63.S1_s_at	ATCTGAACGTACAAGACGCGGCGGT	AFFX-r2-Bs-dap-3_at	TTCCGGCGCATAAAGTCAGCAAGGT
AF243438.CDS63.S1_s_at	AATCAAATCGCCAGATCCGGGATCT	AFFX-r2-Bs-dap-3_at	TTCATCAGCCGGATTTTGTTATTGA
AF243438.CDS63.S1_s_at	GGATCTCATCGTACACATAACCCTC	AFFX-r2-Bs-dap-3_at	TCATCAGCCGGATTTTGTTATTGAT
AF243438.CDS63.S1_s_at	CGCCCGCGGATATCGTAGCAGTGAT	AFFX-r2-Bs-dap-3_at	ATCTCGGATACAATAGAGGCAAAGA
AFFX-ThrX-M_at	GTAAAGGCAGCCGAGGAATCCAATG	AFFX-r2-Bs-dap-3_at	TATCCCGTCAAAGGATTCCGTTTCT
AFFX-ThrX-M_at	ACTGATGATGAAATCCTTCACGCAT	Cfa.10039.1.A1_at	GCTTTGTATATCACGCTGGCTGAGT
AFFX-ThrX-M_at	ATCCTTCACGCATATCAGCTGATCG	Cfa.10039.1.A1_at	TGAGAGCTCATTCAATTCTTACTGA
AFFX-ThrX-M_at	TATCAGCTGATCGCCCGTGTAGAAG	Cfa.10039.1.A1_at	TACTGAGAAGGCAAGGTACTCTGTA
AFFX-ThrX-M_at	CAGAACCAGGTTCTTGCGCGTCTAT	Cfa.10039.1.A1_at	GTACTCTGTATGACGTGGGACATCA
AFFX-ThrX-M_at	TGCGCGTCTATCGCAGGAGTGCTGA	Cfa.10039.1.A1_at	TGGGACATCATTTTTAGTTGGGCAT
AFFX-ThrX-M_at	AAGGCAGCAAGGTCGTAGCTGTGTT	Cfa.10039.1.A1_at	ATACCTTCAATATTTTTTCCTCATA
AFFX-ThrX-M_at	AAGATCCGAACACAGCGGTCGACAT	Cfa.10039.1.A1_at	AATGCCCAGTATATTCCTGTAAGTC
AFFX-ThrX-M_at	GCGGTCGACATTTCAGAAATCAAGC	Cfa.10039.1.A1_at	GACATTTCTTTCAGTTTAGGGATTA
AFFX-ThrX-M_at	TCAGAAATCAAGCCTGTCACATTGC	Cfa.10039.1.A1_at	TCTTTAGCTTCCTTGTAGACCCCAA
AFFX-ThrX-M_at	CCTGTCACATTGCCGACTGATGAAG	Cfa.10039.1.A1_at	CAAGTCTTCTCAGGGTCTGTGGAGT
AFFX-ThrX-M_at	GACAGCATCCTTGAATATGTAAAAG	Cfa.10039.1.A1_at	AGTCCAGACCCCATGCTTTGTATAT
AFFX-ThrX-M_at	ACGAAGCCGACATGCTGTTCTCTGT	AFFX-r2-Bs-phe-5_at	GATTCAGTAGCAGATGCCGTTCAAA
AFFX-ThrX-M_at	TGCTGTTCTCTGTCACTGTTCCCGG	AFFX-r2-Bs-phe-5_at	GCAGATGCCGTTCAAAAGGTCGATT
AFFX-ThrX-M_at	GCTTTGATTCAGTCGGAATGGCGCT	AFFX-r2-Bs-phe-5_at	AGGTCGATTTAAGTAGAAGTGCGTT
AFFX-ThrX-M_at	TCGGAATGGCGCTCAGCAGATATTT	AFFX-r2-Bs-phe-5_at	TTTTCCATTCTACACCATGGTAAAA
AFFX-ThrX-M_at	CAGATATTTGAAGCTGACCGTCTTT	AFFX-r2-Bs-phe-5_at	TTTGGAGGATAGGTCAGGTGCGTTA
AFFX-ThrX-M_at	TGACCGTCTTTGAAAGCGACAAATG	AFFX-r2-Bs-phe-5_at	GGAGGATAGGTCAGGTGCGTTATCT
AFFX-ThrX-M_at	CAGATAACCTGATCTACCAAGTGGC	AFFX-r2-Bs-phe-5_at	GTAGCTGATTCTGGAAGCAACGTTC
AFFX-ThrX-M_at	CTCCTGTCCATGTGAAGGTGTGGAG	AFFX-r2-Bs-phe-5_at	CTGGAAGCAACGTTCTTTCCATTCA
AF243438.CDS66.S1_s_at	AAATGGCTTTATTATCTGCGGACGG	AFFX-r2-Bs-phe-5_at	GTGACACTGTCTATCAGTACGTCGG
AF243438.CDS66.S1_s_at	GGAAACTGGTTCGTGGCCAATCATT	AFFX-r2-Bs-phe-5_at	TGACACTGTCTATCAGTACGTCGGC
AF243438.CDS66.S1_s_at	TAGAACGTACAGTGCATGCCTTCGC	AFFX-r2-Bs-phe-5_at	TATCAGTACGTCGGCAATGGAAGAA
AF243438.CDS66.S1_s_at	CTATCTAGACATGTTCCAGGACGGG	AFFX-DapX-3_at	AGAAGAAGCAGCTGAAGCAGCCCGC
AF243438.CDS66.S1_s_at	TGCTGCCGCACTCTTGCATATGTAT	AFFX-DapX-3_at	GAAGCAGCTGAAGCAGCCCGCATAT
AF243438.CDS66.S1_s_at	GTATATGTCTATCGGCACAGGGCGA	AFFX-DapX-3_at	GCTGAAGCAGCCCGCATATTAGGCG
AF243438.CDS66.S1_s_at	TAACGGCTGCTACCGAAACTGCGAT	AFFX-DapX-3_at	GCAGCCCGCATATTAGGCGCAGATA
AF243438.CDS66.S1_s_at	TTGGGCTTAACGCATCCACATAATG	AFFX-DapX-3_at	AAGAATTCAGCTAACGCTTCCAGAC
AF243438.CDS66.S1_s_at	GAGATCGCCCGCATCAATGGACGAG	AFFX-DapX-3_at	AATGAGTGATCAGGCAATTCGGTCA
AF243438.CDS66.S1_s_at	ATACAACCATCGATCGCCTAATATC	AFFX-DapX-3_at	TGATCAGGCAATTCGGTCAATTGTC
AF243438.CDS66.S1_s_at	ATTGCCCACCAGTTAAGTTTTCTAG	AFFX-DapX-3_at	ATTCGGTCAATTGTCACTGTCATCA
AF243438.CDS4.S1_s_at	TGGTTTCCAGGTGACGGGAGACCCT	AFFX-DapX-3_at	TCAATTGTCACTGTCATCAGAATCT
AF243438.CDS4.S1_s_at	ATGAACCTAACGCTCCACATTGCTC	AFFX-DapX-3_at	GTCACTGTCATCAGAATCTGTCGGC
AF243438.CDS4.S1_s_at	GATACGGAGGAACTTTGCGCCCAGC	AFFX-DapX-3_at	CATCAGAATCTGTCGGCCAAAAGCG
AF243438.CDS4.S1_s_at	ATGCGGAGGAGCTTTGCGCCCAGCT	AFFX-DapX-3_at	AGGATCGCCATCCGGATCACGGCAA
AF243438.CDS4.S1_s_at	ATTGTGTCCTGTTACCGAGCCGTGT	AFFX-DapX-3_at	TCCGGATCACGGCAATGCGGCTGCA
AF243438.CDS4.S1_s_at	TTTACGCTCAGCTTTGTCCTGTTGG	AFFX-DapX-3_at	GGCAATGCGGCTGCACTGGTGGAAG
AF243438.CDS4.S1_s_at	AGAGGCTTTATGCTCGTCTTACCGA	AFFX-DapX-3_at	GCCTTCCGGCGCATAAAGTCAGCAA
AF243438.CDS4.S1_s_at	GTCTTACCGAGGATCCCGAACAGGA	AFFX-DapX-3_at	GATAAATGGTTTTCATCAGCCGGAT
AF243438.CDS4.S1_s_at	AGGATTCCTTGTATTCGGGCCAGAT	AFFX-DapX-3_at	TTTTGTTATTGATATCTCGGATACA
AF243438.CDS4.S1_s_at	AGTTTCCCTCGGATACTCAGTCTAC	AFFX-DapX-3_at	TTGATATCTCGGATACAATAGAGGC
AF243438.CDS4.S1_s_at	TCAGTCTACGGTCTGGTGGTTTCCA	AFFX-DapX-3_at	CTACTCCTCTGACGAATGGGTATAT
AF243438.CDS92.S1_s_at	GAAGTAATCCTCATGCATACCCCAT	AFFX-DapX-3_at	GGTATATTGAAATCGTTGAAGCGAG
AF243438.CDS92.S1_s_at	GAGGTAGCTCGATATGCCGTGGTTC	AFFX-Cf_G-6-PDH_5_at	TGGAATCCAGTCAACGCACTACCTC
AF243438.CDS92.S1_s_at	CTTGCTCTACCTGTGTGCGAGTATA	AFFX-Cf_G-6-PDH_5_at	CAGTCAACGCACTACCTCCAGGTGA
AF243438.CDS92.S1_s_at	GCGAGTATAGAACACCCTTAGGCCT	AFFX-Cf_G-6-PDH_5_at	GGAATGCCTTCTATGTCCTCTTTCC
AF243438.CDS92.S1_s_at	TTAGGCCTGCCGGATGATAGCATAG	AFFX-Cf_G-6-PDH_5_at	TCTTTCCCATCTGGTTCCATCTGCG
AF243438.CDS92.S1_s_at	ATGATCTTATCAAACCTAACCGGGA	AFFX-Cf_G-6-PDH_5_at	AGCTGTGATTGGAGACTGGCTCAAC
AF243438.CDS92.S1_s_at	CACTATTCACCATCGATCTTCTAAT	AFFX-Cf_G-6-PDH_5_at	TTGGAGACTGGCTCAACCTCGTCTT
AF243438.CDS92.S1_s_at	ATATCCATTTGGACGCAGGCCGATG	AFFX-Cf_G-6-PDH_5_at	CTCGTCTTTAAATGGATTCTGTTTG
AF243438.CDS92.S1_s_at	TTGGAGGTCTTATGTACCAGCACCC	AFFX-Cf_G-6-PDH_5_at	AAATGGATTCTGTTTGGACAGCGTC
AF243438.CDS92.S1_s_at	ATTTGCCGCAATCTCCATTTACGTC	AFFX-Cf_G-6-PDH_5_at	ACTGGACCAGGGAGTCCCTCTGGTC
AF243438.CDS92.S1_s_at	TCCGCCTCGATCCAGACTAATGAAT	AFFX-Cf_G-6-PDH_5_at	TCAGCTGTAGGCTGCCTGAGGAGCC
AFFX-r2-Bs-phe-M_at	TCGGTTATTTAGGTCCAGCAGCTAC	AFFX-Cf_G-6-PDH_5_at	GTGATGGTCACATCTACCCTTTCTA
AFFX-r2-Bs-phe-M_at	CTACATTTACACATCTAGCAGTCAG	AFFX-Cf_G-6-PDH_5_at	CATCTACCCTTTCTATCTTTCGGGG
AFFX-r2-Bs-phe-M_at	TACATTTACACATCTAGCAGTCAGT	AFFX-Cf_G-6-PDH_5_at	GAGAAAAAGGCCAACCTACAGATTT
AFFX-r2-Bs-phe-M_at	CCGAACATGTTGCTTACCGCACCAT	AFFX-Cf_G-6-PDH_5_at	TCCTTCTGTGGTTGGGATTCTGGGC
AFFX-r2-Bs-phe-M_at	GAACATGTTGCTTACCGCACCATTC	AFFX-Cf_G-6-PDH_5_at	GATTCTGGGCTGTGCAGCTGAACGT
AFFX-r2-Bs-phe-M_at	GGAGTGTATAGATGCAGCCGTTGCA	AFFX-Cf_G-6-PDH_5_at	AGGAATGGATGTGCTCCATGACTTT
AFFX-r2-Bs-phe-M_at	GTTGCAGGCGAAGTTGATTTTGCTT	AFFX-r2-Bs-lys-5_at	TAGAAATCGGAGGTGTGGATGCTCT
AFFX-r2-Bs-phe-M_at	AATCGTGGGTGAAATGACGTTGCCG	AFFX-r2-Bs-lys-5_at	GGATGCTCTCTATTTAGCGGAGAAA
AFFX-r2-Bs-phe-M_at	GCTCGACAAAATTTACTCACATTCA	AFFX-r2-Bs-lys-5_at	AGCGGAGAAATATGGTACACCTCTT
AFFX-r2-Bs-phe-M_at	ATTTCTTCATCGACATTTTCCTTCC	AFFX-r2-Bs-lys-5_at	GGAGAAATATGGTACACCTCTTTAC
AFFX-r2-Bs-phe-M_at	ATATGAATACGCCAATTCTACCGGG	AFFX-r2-Bs-lys-5_at	TACACCTCTTTACGTATATGATGTG
AFFX-r2-TagA_at	GCGCCGGTTAAGCCGCTATTAGCGT	AFFX-r2-Bs-lys-5_at	CACCTCTTTACGTATATGATGTGGC
AFFX-r2-TagA_at	TCTCTCTAGGAGCGGCTTCGCACAA	AFFX-r2-Bs-lys-5_at	GGCTTTAATACGTGAGCGTGCTAAA
AFFX-r2-TagA_at	GCTCAATCCTAGATACGTTGCGCTC	AFFX-r2-Bs-lys-5_at	GCAGGCGTTTATTTCTGCAGGGCTG
AFFX-r2-TagA_at	GTTGCGCTCTTTGGTAAACGGCTCA	AFFX-r2-Bs-lys-5_at	ATCAGTCGCAATGATTCAGCTCGCT
AFFX-r2-TagA_at	GGCTCAGATCTTAGCACTCGTGCAG	AFFX-r2-Bs-lys-5_at	GGACTTTCTTTAGATGTCGTATCCG
AFFX-r2-TagA_at	ACGATGGCAAGTCGTGCCTCGTTCT	AFFX-r2-Bs-lys-5_at	GAGAGCTATATACGGCTGTTGCAGC
AFFX-r2-TagA_at	GGGTCGGCTCAACAGTGTATCCGGT	Cfa.10068.1.A1_at	ATGTTTTTGAAGCTGTTTTTATATT
AFFX-r2-TagA_at	GCACTGACACGCGATGACGTTCGTC	Cfa.10068.1.A1_at	GGGTTTGTCATTTACACTATTGGGA
AFFX-r2-TagA_at	TAATCTCAGAATCCGTACAGCCGCA	Cfa.10068.1.A1_at	GTCATTTACACTATTGGGATTTTTA
AFFX-r2-TagA_at	GTATCGCTTCGCGTGTCATGACTTG	Cfa.10068.1.A1_at	ATAGGCTAATGGTTATTCTCACTTG
AFFX-r2-TagA_at	TTCAAGTACCTTAGCTCGTCGGACG	Cfa.10068.1.A1_at	GCTAATGGTTATTCTCACTTGGGTC
AFFX-r2-Bs-lys-M_at	GAACGCATCCACTTTCATGGAAACA	Cfa.10068.1.A1_at	TGGTTATTCTCACTTGGGTCCAAGT
AFFX-r2-Bs-lys-M_at	GCTTCTTGAAGACCTATGTAAAGAA	Cfa.10068.1.A1_at	GGGTCCAAGTGGTTAGACAGTTCTC
AFFX-r2-Bs-lys-M_at	CTTCGGATCACGCCCGGAGTAGAAG	Cfa.10068.1.A1_at	AAGTGGTTAGACAGTTCTCACACAT
AFFX-r2-Bs-lys-M_at	TACGCATGACTACATTACAACGGGC	Cfa.10068.1.A1_at	AGTTCTCACACATGAAATTCTGTAA
AFFX-r2-Bs-lys-M_at	TGACTACATTACAACGGGCCAGGAA	Cfa.10068.1.A1_at	AAGCAACCTTTTGTTGAGAGTTTGC
AFFX-r2-Bs-lys-M_at	GACTACATTACAACGGGCCAGGAAG	Cfa.10068.1.A1_at	AACCTTTTGTTGAGAGTTTGCTCTA
AFFX-r2-Bs-lys-M_at	AGTTTGGTTTCGATCTTCATAACGG	Cfa.10094.1.A1_at	TACATGTGTTAATAGCTTAGGCTCC
AFFX-r2-Bs-lys-M_at	TTTCGATCTTCATAACGGACAAACT	Cfa.10094.1.A1_at	AAGCTCATCTGGTAGCAGTCCCTCT
AFFX-r2-Bs-lys-M_at	ACTGAACGGGCCATTGAACAAGTAT	Cfa.10094.1.A1_at	GTAGCAGTCCCTCTGTAGTAGGTAC
AFFX-r2-Bs-lys-M_at	CTGAACGGGCCATTGAACAAGTATT	Cfa.10094.1.A1_at	TCTGCACTTTCTTACTGCCTTAGAT
AFFX-r2-Bs-lys-M_at	TCCATTGCCATATCGGCTCGCAAAT	Cfa.10094.1.A1_at	TTACTGCCTTAGATACTCGTGCTCT
AF243438.CDS31.S1_s_at	GAATCTATTGACACGGAGCTCCTAT	Cfa.10094.1.A1_at	GTATCTCGCTTCTATAGTGACTTGA
AF243438.CDS31.S1_s_at	TATTTCCCGTTACTGTTCCTACTAG	Cfa.10094.1.A1_at	TCTGTGCCCTGCTGTGAGAGCTTGA
AF243438.CDS31.S1_s_at	GAAGACTTTATCTCGTGCCATTGAA	Cfa.10094.1.A1_at	TGTGAGAGCTTGACGCGTTGCCCTG
AF243438.CDS31.S1_s_at	ATTAGTCCAACGCTTCATAGCCTAG	Cfa.10094.1.A1_at	ATCCCAAGCGCTTGCTCTAGAGGAA
AF243438.CDS31.S1_s_at	GATGCCGCAGAATCTACCGTTAGAA	Cfa.10094.1.A1_at	GAAGCCGTCCCGTAGCTAGGAGAGT
AF243438.CDS31.S1_s_at	TGTATACTATGATCCCTACGCTACT	Cfa.10094.1.A1_at	ATTCTACTCTTCTTTTTACATGCAG
AF243438.CDS31.S1_s_at	TAAACGCTCTCGTGGGTCTTGAGAC	AFFX-Cf_AdrenRecpt_5_at	GCTCCGTGGCCTCACGGGAACGGCT
AF243438.CDS31.S1_s_at	GAAGATATCCCGTCTATGAGGCACT	AFFX-Cf_AdrenRecpt_5_at	CACGGGAACGGCTCTGTGGCCTCGT
AF243438.CDS31.S1_s_at	GCGTGGATTACTATGACCCTCAACT	AFFX-Cf_AdrenRecpt_5_at	CCGATGCCGCCAACACGAGTGGGCT
AF243438.CDS31.S1_s_at	GAAATGTATTATCTCTCCATCCTCT	AFFX-Cf_AdrenRecpt_5_at	ATGCCGCCAACACGAGTGGGCTGCC
AF243438.CDS31.S1_s_at	AAAGTATGCACGTTTGATGGCCCTG	AFFX-Cf_AdrenRecpt_5_at	CCGCCAACACGAGTGGGCTGCCAGG
AF243438.CDS34.S1_s_at	TATATCGCCCAGTCAGAAGTTTTTG	AFFX-Cf_AdrenRecpt_5_at	TGGGAGGCAACCTGCTGGTCATCGT
AF243438.CDS34.S1_s_at	AGTTGTGCGATCATCATACCTCTAC	AFFX-Cf_AdrenRecpt_5_at	GTCATCGTGGCCATCGCTCGGACGC
AF243438.CDS34.S1_s_at	GACTGTGCTCTTGCAGACATGACAA	AFFX-Cf_AdrenRecpt_5_at	GCTCGGACGCCAAGACTGCAGACCA
AF243438.CDS34.S1_s_at	GCGATTTTATTTCTTGGCATGGCTA	AFFX-Cf_AdrenRecpt_5_at	CTGCAGACCATGACCAACGTGTTCG
AF243438.CDS34.S1_s_at	GAACTGGATGCCTTCCTCATTGGAA	AFFX-Cf_AdrenRecpt_5_at	AGACCATGACCAACGTGTTCGTGAC
AF243438.CDS34.S1_s_at	TTGGAAGAGCCCACATCGCGAGTTC	AFFX-Cf_AdrenRecpt_5_at	TGACCAACGTGTTCGTGACGTCGCT
AF243438.CDS34.S1_s_at	TTCCTAGTCCATCAGCCTTTGCAGA	AFFX-Cf_AdrenRecpt_5_at	GTGTTCGTGACGTCGCTGGCCACCG
AF243438.CDS34.S1_s_at	TGCAGACGCGACTACTTTATTGGAT	AFFX-Cf_AdrenRecpt_5_at	TCGTGACGTCGCTGGCCACCGCGGA
AF243438.CDS34.S1_s_at	AACTGGCTCTTATTCTAGACGGTCT	AFFX-Cf_AdrenRecpt_5_at	CCACCGGTTGCGAGCTGTGGACCTC
AF243438.CDS34.S1_s_at	ATTGATCCCATAGACGTCGCGTTAC	AFFX-Cf_AdrenRecpt_5_at	ACCGGTTGCGAGCTGTGGACCTCAG
[truncated: 174,823 more rows]

## Sheet: NCBI-blast+ annotation(chick)
Chicken Genome array												All genes in affymetrix			Genes corresponding to the annotated probes			Common affymetrix annotated probes			Genes Unique to new annotation
Probe_ID	Ensembl	Frequency	qsseq	qesed	ssseq	seseq	qseq	evalue	bitscore	%identity		Size of my Hash is: 12639			Size of my Hash is: 7412			Size of my Hash is: 6229			1183
AB112960.CDS1.S1_at	ENSGALG00000009895	1	1	19	84133	84151	AATGCAGGAAATTACAAAA	0.023	36.2	100		ENSGALG00000005749	1		ENSGALG00000005210	5		ENSGALG00000005210	1		ENSGALG00000022237
AF004856.CDS1.S1_s_at	ENSGALG00000012280	1	1	17	68415	68399	AGCCAGCTGAATGTGAA	0.29	32.5	100		ENSGALG00000015078	3		ENSGALG00000022237	7		ENSGALG00000015732	1		ENSGALG00000015720
AF004857.CDS1.S1_s_at	ENSGALG00000003658	1	8	25	22921	22904	GTGGTTTCTTATTAATTG	0.081	34.4	100		ENSGALG00000026704	1		ENSGALG00000015720	3		ENSGALG00000015145	1		ENSGALG00000011542
AF004857.CDS2.S1_s_at	ENSGALG00000006264	1	5	25	90663	90643	TGACCCATCACAGTATTTTAA	0.081	34.4	95.24		ENSGALG00000022938	1		ENSGALG00000015732	2		ENSGALG00000022938	1		ENSGALG00000008918
AF004857.CDS3.S1_s_at	ENSGALG00000010967	1	2	18	24211	24195	TTTCTTTAACATCATAC	0.29	32.5	100		ENSGALG00000027579	1		ENSGALG00000015145	1		ENSGALG00000027579	1		ENSGALG00000027429
AF059716.CDS1.S1_at	ENSGALG00000016105	1	7	25	9466	9448	TCAGACCAACACCATCAGC	0.023	36.2	100		ENSGALG00000005000	1		ENSGALG00000022938	1		ENSGALG00000016576	1		ENSGALG00000011409
AF059717.CDS1.S1_at	ENSGALG00000021819	1	8	24	45043	45059	CTCATCCAGGCAGATCT	0.29	32.5	100		ENSGALG00000010692	1		ENSGALG00000027579	2		ENSGALG00000010692	1		ENSGALG00000021180
AF059721.CDS1.S1_at	ENSGALG00000005169	1	6	23	1528	1545	TCTTGTTTCTCCATCTGT	0.081	34.4	100		ENSGALG00000008372	1		ENSGALG00000011542	1		ENSGALG00000011917	1		ENSGALG00000008822
AF059724.CDS1.S1_at	ENSGALG00000028945	1	3	19	4261	4277	CAGCTTGCTGAACTCGA	0.29	32.5	100		ENSGALG00000003596	1		ENSGALG00000016576	2		ENSGALG00000003596	1		ENSGALG00000026644
AF059725.CDS1.S1_at	ENSGALG00000027159	1	2	22	19535	19515	TTTGTACTTCCTTACATGCTG	0.081	34.4	95.24		ENSGALG00000013031	1		ENSGALG00000010692	7		ENSGALG00000006794	1		ENSGALG00000021685
AF176590.CDS1.S1_s_at	ENSGALG00000016967	1	1	17	113772	113756	AATACAGAGCTATTTGC	0.29	32.5	100		ENSGALG00000011403	3		ENSGALG00000003596	3		ENSGALG00000013031	1		ENSGALG00000013861
AF176591.CDS1.S1_s_at	ENSGALG00000010029	1	1	21	21155	21135	GAAAAGGACACCTCTGCTCTT	0.081	34.4	95.24		ENSGALG00000014310	3		ENSGALG00000011917	3		ENSGALG00000014310	1		ENSGALG00000016388
AF176592.CDS1.S1_s_at	ENSGALG00000004756	1	9	25	3446	3430	CTGAATCAATTACTGAG	0.29	32.5	100		ENSGALG00000026437	1		ENSGALG00000008918	1		ENSGALG00000008907	1		ENSGALG00000017016
AF176592.CDS2.S1_s_at	ENSGALG00000010312	2	3	21	47103	47085	AGTTAAAGTGCATGCTAAT	0.023	36.2	100		ENSGALG00000011210	1		ENSGALG00000006794	1		ENSGALG00000009152	1		ENSGALG00000014646
AF218359.CDS1.S1_at	ENSGALG00000004759	1	2	19	3200	3183	GCGGCGACTTGCAAGCTA	0.081	34.4	100		ENSGALG00000005473	1		ENSGALG00000013031	2		ENSGALG00000007736	1		ENSGALG00000026153
AF218359.CDS2.S1_at	ENSGALG00000027655	1	1	21	55432	55412	AAGTGCAACGCTTTGATTTCT	0.081	34.4	95.24		ENSGALG00000015558	1		ENSGALG00000027429	1		ENSGALG00000005706	1		ENSGALG00000014643
AF218359.CDS3.S1_at	ENSGALG00000011106	1	9	25	87499	87483	GACATCATACTCAGCAG	0.29	32.5	100		ENSGALG00000002709	2		ENSGALG00000014310	1		ENSGALG00000014751	1		ENSGALG00000023542
AF243438.CDS10.S1_s_at	ENSGALG00000016739	1	2	18	64895	64911	TATAATGTTTGCAACTG	0.29	32.5	100		ENSGALG00000016820	2		ENSGALG00000008907	1		ENSGALG00000026857	1		ENSGALG00000026357
AF243438.CDS11.S1_s_at	ENSGALG00000010469	1	3	19	1572	1588	ACATATTTTTCCCGTGT	0.29	32.5	100		ENSGALG00000001293	2		ENSGALG00000009152	6		ENSGALG00000015558	1		ENSGALG00000020092
AF243438.CDS12.S1_s_at	ENSGALG00000003777	2	9	25	215275	215259	GAGAGAGCTCTTACTCT	0.29	32.5	100		ENSGALG00000001158	1		ENSGALG00000011409	1		ENSGALG00000002709	1		ENSGALG00000028437
AF243438.CDS13.S1_s_at	ENSGALG00000016967	1	1	18	271701	271684	TAATCCATTCTTCCCCAG	0.081	34.4	100		ENSGALG00000010173	1		ENSGALG00000007736	1		ENSGALG00000016820	1		ENSGALG00000020879
AF243438.CDS14.S1_s_at	ENSGALG00000016889	1	5	21	5644	5660	AGTACTCGTGCATCTTT	0.29	32.5	100		ENSGALG00000002033	1		ENSGALG00000021180	1		ENSGALG00000012363	1		ENSGALG00000018512
AF243438.CDS16.S1_s_at	ENSGALG00000018967	1	6	25	37788	37807	TTCTTCATTCTCTTCATCAT	0.006	38.1	100		ENSGALG00000008098	2		ENSGALG00000005706	1		ENSGALG00000010820	1		ENSGALG00000006806
AF243438.CDS17.S1_s_at	ENSGALG00000011604	1	2	23	142910	142931	ACATATGTTCTTATCTCCTACG	0.023	36.2	95.45		ENSGALG00000015952	1		ENSGALG00000014751	3		ENSGALG00000001158	1		ENSGALG00000017291
AF243438.CDS18.S1_s_at	ENSGALG00000019420	1	4	24	41707	41727	GACAGCTACACTTTGATGGGT	0.081	34.4	95.24		ENSGALG00000001312	1		ENSGALG00000026857	2		ENSGALG00000004255	1		ENSGALG00000023982
AF243438.CDS19.S1_s_at	ENSGALG00000027337	1	1	18	10087	10070	AAGACTTTCTGAACTTTG	0.081	34.4	100		ENSGALG00000012123	1		ENSGALG00000015558	1		ENSGALG00000001026	1		ENSGALG00000013430
AF243438.CDS2.S1_s_at	ENSGALG00000009693	1	3	25	34243	34265	GGCCACGTCTTTGTGCACGCTCA	0.006	38.1	95.65		ENSGALG00000006384	2		ENSGALG00000016820	1		ENSGALG00000001482	1		ENSGALG00000028819
AF243438.CDS20.S1_s_at	ENSGALG00000013377	1	1	18	38995	39012	GCAGAACCTTTGGATTTT	0.081	34.4	100		ENSGALG00000016668	1		ENSGALG00000002709	4		ENSGALG00000027998	1		ENSGALG00000028340
AF243438.CDS21.S1_s_at	ENSGALG00000006498	1	2	20	427618	427600	AGAAATAATCCTTCCTGCC	0.023	36.2	100		ENSGALG00000005027	3		ENSGALG00000010820	1		ENSGALG00000009253	1		ENSGALG00000004853
AF243438.CDS22.S1_s_at	ENSGALG00000005121	1	1	18	3694	3677	AAACTGCCTTAAAACGCC	0.081	34.4	100		ENSGALG00000010052	1		ENSGALG00000001158	4		ENSGALG00000005027	1		ENSGALG00000004794
AF243438.CDS23.S1_s_at	ENSGALG00000009580	1	2	18	26904	26888	ATCCCGTTCTGCTGAAG	0.29	32.5	100		ENSGALG00000007485	1		ENSGALG00000012363	4		ENSGALG00000010052	1		ENSGALG00000026129
AF243438.CDS24.S1_s_at	ENSGALG00000012177	1	2	18	62317	62333	TGGATGATTTGAGATGT	0.29	32.5	100		ENSGALG00000001730	4		ENSGALG00000008822	1		ENSGALG00000007485	1		ENSGALG00000019164
AF243438.CDS25.S1_s_at	ENSGALG00000020557	1	2	25	130568	130545	TCATTCTAATCATCACTCCTGTGA	0.081	34.4	91.67		ENSGALG00000011926	3		ENSGALG00000001482	4		ENSGALG00000001730	1		ENSGALG00000023297
AF243438.CDS26.S1_s_at	ENSGALG00000028598	1	1	20	40814	40834	AAA-CAACCTGTTGGAGCTTG	0.29	32.5	95.24		ENSGALG00000026762	1		ENSGALG00000001026	6		ENSGALG00000016391	1		ENSGALG00000006602
AF243438.CDS27.S1_s_at	ENSGALG00000011309	1	5	23	45737	45719	AAATTGCTGAACCCCAAAC	0.023	36.2	100		ENSGALG00000011083	1		ENSGALG00000004255	4		ENSGALG00000009272	1		ENSGALG00000013129
AF243438.CDS28.S1_s_at	ENSGALG00000001150	1	4	21	118832	118849	TATTGTGTTGCACAGTGC	0.081	34.4	100		ENSGALG00000008587	1		ENSGALG00000027998	1		ENSGALG00000002894	1		ENSGALG00000004446
AF243438.CDS3.S1_s_at	ENSGALG00000028383	1	3	24	654	633	ACTGAAATTATCTTTGCTCTCA	0.023	36.2	95.45		ENSGALG00000011913	1		ENSGALG00000009253	1		ENSGALG00000017104	1		ENSGALG00000027887
AF243438.CDS30.S1_s_at	ENSGALG00000005519	1	1	17	10072	10088	ACCAGGTCTTGTACTCT	0.29	32.5	100		ENSGALG00000015253	3		ENSGALG00000005027	2		ENSGALG00000016929	1		ENSGALG00000003540
AF243438.CDS31.S1_s_at	ENSGALG00000008171	1	1	18	10691	10708	GAAATGTATTATCTCTCC	0.081	34.4	100		ENSGALG00000027943	3		ENSGALG00000010052	1		ENSGALG00000026345	1		ENSGALG00000027017
AF243438.CDS32.S1_s_at	ENSGALG00000010780	1	4	21	5480	5497	TATTCTACAGGCACTACC	0.081	34.4	100		ENSGALG00000005410	1		ENSGALG00000007485	1		ENSGALG00000011083	1		ENSGALG00000028475
AF243438.CDS33.S1_s_at	ENSGALG00000012956	1	5	22	81853	81870	GCAATTGGATTTCTCCTC	0.081	34.4	100		ENSGALG00000011986	1		ENSGALG00000001730	1		ENSGALG00000011913	1		ENSGALG00000015118
AF243438.CDS34.S1_s_at	ENSGALG00000001028	1	5	22	8393	8410	GTGCTCTTGCAGACATGA	0.081	34.4	100		ENSGALG00000026113	2		ENSGALG00000016391	4		ENSGALG00000015253	1		ENSGALG00000009485
AF243438.CDS35.S1_s_at	ENSGALG00000016029	1	4	21	65480	65463	TACAGCGCTTTTAGTTTT	0.081	34.4	100		ENSGALG00000014171	1		ENSGALG00000009272	1		ENSGALG00000005410	1		ENSGALG00000027912
AF243438.CDS36.S1_s_at	ENSGALG00000027564	1	4	22	44775	44757	ATTACTGGCCTGTCCACAA	0.023	36.2	100		ENSGALG00000023406	1		ENSGALG00000002894	1		ENSGALG00000011986	1		ENSGALG00000006219
AF243438.CDS37.S1_s_at	ENSGALG00000012941	1	2	23	38810	38830	AAAACTGTCTGTTCTACATGTG	0.081	34.4	95.45		ENSGALG00000010346	1		ENSGALG00000017104	3		ENSGALG00000026113	1		ENSGALG00000002988
AF243438.CDS38.S1_s_at	ENSGALG00000006978	1	6	22	3247	3263	CACCGTTTGCTTTGGAA	0.29	32.5	100		ENSGALG00000015466	2		ENSGALG00000026644	2		ENSGALG00000014171	1		ENSGALG00000006463
AF243438.CDS4.S1_s_at	ENSGALG00000004428	1	3	19	2810	2794	TTTCCCTCGGATACTCA	0.29	32.5	100		ENSGALG00000013720	2		ENSGALG00000016929	2		ENSGALG00000010346	1		ENSGALG00000008136
AF243438.CDS41.S1_s_at	ENSGALG00000004848	1	8	25	3754	3771	CTGGTGTCTCTGCTTTCA	0.081	34.4	100		ENSGALG00000014916	1		ENSGALG00000011083	1		ENSGALG00000023406	1		ENSGALG00000029049
AF243438.CDS42.S1_s_at	ENSGALG00000013634	1	3	24	63202	63223	AATGTAGGGCTGCTTCCTCACT	0.023	36.2	95.45		ENSGALG00000002621	2		ENSGALG00000026345	1		ENSGALG00000015466	1		ENSGALG00000009993
AF243438.CDS43.S1_s_at	ENSGALG00000005088	1	3	19	77648	77632	ACAGCCAATATTTTCCT	0.29	32.5	100		ENSGALG00000008698	2		ENSGALG00000011913	1		ENSGALG00000013521	1		ENSGALG00000005272
AF243438.CDS44.S1_s_at	ENSGALG00000009254	1	7	23	5941	5957	AACAATTGCCTGTAGTG	0.29	32.5	100		ENSGALG00000010152	1		ENSGALG00000021685	1		ENSGALG00000015196	1		ENSGALG00000027540
AF243438.CDS45.S1_s_at	ENSGALG00000008988	1	3	20	29321	29304	TGTCCTACATGCGTATCT	0.081	34.4	100		ENSGALG00000014189	1		ENSGALG00000015253	4		ENSGALG00000014916	1		ENSGALG00000026142
AF243438.CDS46.S1_s_at	ENSGALG00000001652	1	6	24	5942	5924	CTTGGCGATCACAGGGACA	0.023	36.2	100		ENSGALG00000027155	1		ENSGALG00000005410	1		ENSGALG00000008088	1		ENSGALG00000027853
AF243438.CDS47.S1_s_at	ENSGALG00000002715	1	3	24	47088	47108	AAAGACTCGCTTCAGCCATTCG	0.081	34.4	95.45		ENSGALG00000002655	1		ENSGALG00000011986	1		ENSGALG00000010152	1		ENSGALG00000000891
AF243438.CDS48.S1_s_at	ENSGALG00000010770	1	8	25	11309	11292	TCTGATTGTGAACTGCTT	0.081	34.4	100		ENSGALG00000028294	1		ENSGALG00000026113	1		ENSGALG00000008698	1		ENSGALG00000007863
AF243438.CDS49.S1_s_at	ENSGALG00000017226	1	5	22	42126	42109	TTTGATCCCTCTGATTTG	0.081	34.4	100		ENSGALG00000024271	1		ENSGALG00000014171	2		ENSGALG00000002621	1		ENSGALG00000026830
AF243438.CDS5.S1_s_at	ENSGALG00000003473	2	3	24	9031	9010	GAGCAGAGCTGGGCGCAAAGCT	0.023	36.2	95.45		ENSGALG00000017027	3		ENSGALG00000023406	1		ENSGALG00000002655	1		ENSGALG00000022896
AF243438.CDS50.S1_s_at	ENSGALG00000003980	1	3	24	39077	39055	TTATTC-TTCTTTTTGGCCACCA	0.023	36.2	95.65		ENSGALG00000010380	1		ENSGALG00000010346	2		ENSGALG00000014189	1		ENSGALG00000016165
AF243438.CDS51.S1_s_at	ENSGALG00000015849	1	8	25	30867	30884	TTTGTTGGCTTTTGGGAA	0.081	34.4	100		ENSGALG00000028913	1		ENSGALG00000015466	1		ENSGALG00000022871	1		ENSGALG00000011274
AF243438.CDS54.S1_s_at	ENSGALG00000000972	1	4	21	65252	65269	TGTGCATTTCTTCGCACA	0.081	34.4	100		ENSGALG00000002948	1		ENSGALG00000014916	1		ENSGALG00000017027	1		ENSGALG00000026011
AF243438.CDS55.S1_s_at	ENSGALG00000004420	1	4	24	141885	141905	GCACTATCGTATCCCAATTTA	0.081	34.4	95.24		ENSGALG00000012396	2		ENSGALG00000015196	2		ENSGALG00000002948	1		ENSGALG00000002507
AF243438.CDS56.S1_s_at	ENSGALG00000006519	1	5	25	381	360	CTTTCTGCCTTGCA-CTGGAAG	0.081	34.4	95.45		ENSGALG00000011296	3		ENSGALG00000013521	4		ENSGALG00000028913	1		ENSGALG00000006965
AF243438.CDS57.S1_s_at	ENSGALG00000015348	1	1	19	81195	81177	TTGGCAGGTTTTGGTTTGG	0.023	36.2	100		ENSGALG00000010206	2		ENSGALG00000008088	1		ENSGALG00000010427	1		ENSGALG00000026372
AF243438.CDS58.S1_s_at	ENSGALG00000009455	1	8	24	6493	6477	CCCTCTGAGATTACTGT	0.29	32.5	100		ENSGALG00000008678	1		ENSGALG00000008698	1		ENSGALG00000010206	1		ENSGALG00000015918
AF243438.CDS59.S1_s_at	ENSGALG00000015803	1	1	21	5275	5295	GGTTGAAGCAATTGTCCCATT	0.081	34.4	95.24		ENSGALG00000000643	1		ENSGALG00000002621	1		ENSGALG00000017318	1		ENSGALG00000018634
AF243438.CDS6.S1_s_at	ENSGALG00000024447	1	5	23	2002	1984	GAGAGCTGTGAGGTTCTGG	0.023	36.2	100		ENSGALG00000002303	1		ENSGALG00000010152	2		ENSGALG00000011296	1		ENSGALG00000009107
AF243438.CDS60.S1_s_at	ENSGALG00000015064	1	4	20	27507	27523	TGGAGTTTTATGTCCAG	0.29	32.5	100		ENSGALG00000008991	4		ENSGALG00000002655	1		ENSGALG00000000643	1		ENSGALG00000021324
AF243438.CDS62.S1_s_at	ENSGALG00000016933	1	3	20	340244	340261	AAGTATATTCTCTATCAC	0.081	34.4	100		ENSGALG00000009975	2		ENSGALG00000022871	1		ENSGALG00000002303	1		ENSGALG00000007840
AF243438.CDS63.S1_s_at	ENSGALG00000001375	1	6	25	77192	77173	ATCAGCATCTAGCACTTGGA	0.006	38.1	100		ENSGALG00000014956	1		ENSGALG00000014189	1		ENSGALG00000008678	1		ENSGALG00000027535
AF243438.CDS64.S1_s_at	ENSGALG00000016481	1	7	25	12647	12665	GTTTTCTGTGCTGTTTTAT	0.023	36.2	100		ENSGALG00000006599	4		ENSGALG00000017027	1		ENSGALG00000002679	1		ENSGALG00000016269
AF243438.CDS65.S1_s_at	ENSGALG00000027853	1	1	23	89587	89566	TGGTCAATTTGCAACTCTCATTC	0.023	36.2	95.65		ENSGALG00000008750	2		ENSGALG00000028913	2		ENSGALG00000009975	1		ENSGALG00000027286
AF243438.CDS66.S1_s_at	ENSGALG00000009322	1	1	18	27685	27668	CTATCTAGACATGTTCCA	0.081	34.4	100		ENSGALG00000016990	4		ENSGALG00000002948	2		ENSGALG00000014956	1		ENSGALG00000025950
AF243438.CDS67.S1_s_at	ENSGALG00000017229	1	1	21	270048	270028	TATCTTTATCAATAGCTCTCA	0.081	34.4	95.24		ENSGALG00000001895	1		ENSGALG00000010427	1		ENSGALG00000006599	1		ENSGALG00000008228
AF243438.CDS68.S1_s_at	ENSGALG00000013061	1	1	17	9624	9640	ATTTTTGTTTCATCACC	0.29	32.5	100		ENSGALG00000015384	1		ENSGALG00000013861	1		ENSGALG00000008750	1		ENSGALG00000014794
AF243438.CDS69.S1_s_at	ENSGALG00000012866	1	2	19	292	275	CAGGCTGAAGCTCGCACC	0.081	34.4	100		ENSGALG00000012105	3		ENSGALG00000011296	1		ENSGALG00000013715	1		ENSGALG00000019622
AF243438.CDS70.S1_s_at	ENSGALG00000028234	1	5	21	4363	4347	GTGCAATTTCAGGGCCA	0.29	32.5	100		ENSGALG00000006270	3		ENSGALG00000017318	1		ENSGALG00000016990	1		ENSGALG00000016244
AF243438.CDS71.S1_s_at	ENSGALG00000000311	1	6	22	43406	43390	GATGAACCTGTACCACA	0.29	32.5	100		ENSGALG00000010002	1		ENSGALG00000010206	1		ENSGALG00000001895	1		ENSGALG00000010583
AF243438.CDS72.S1_s_at	ENSGALG00000011708	1	9	25	94821	94837	GCAATATGGATTTACCA	0.29	32.5	100		ENSGALG00000005703	4		ENSGALG00000002303	1		ENSGALG00000007533	1		ENSGALG00000000474
AF243438.CDS73.S1_s_at	ENSGALG00000020092	1	2	20	57842	57860	AGGATTTCGGGTGATAACT	0.023	36.2	100		ENSGALG00000027417	1		ENSGALG00000008678	3		ENSGALG00000012105	1		ENSGALG00000028584
AF243438.CDS74.S1_s_at	ENSGALG00000027984	1	1	18	6772	6789	AGCAAGCTGTTGTACATT	0.081	34.4	100		ENSGALG00000008091	1		ENSGALG00000000643	1		ENSGALG00000001183	1		ENSGALG00000021738
AF243438.CDS8.S1_s_at	ENSGALG00000011919	1	4	24	4824	4804	GAACGAGCTGAATTTCTCCCT	0.081	34.4	95.24		ENSGALG00000010371	3		ENSGALG00000002679	3		ENSGALG00000006270	1		ENSGALG00000021875
AF243438.CDS83.S1_s_at	ENSGALG00000014154	1	2	18	14651	14667	CAGCTCCAGCATCCGTT	0.29	32.5	100		ENSGALG00000011291	4		ENSGALG00000009975	1		ENSGALG00000010002	1		ENSGALG00000003935
AF243438.CDS84.S1_s_at	ENSGALG00000007054	1	7	23	1085	1101	TGCGCTGCATCAGATCC	0.29	32.5	100		ENSGALG00000004819	2		ENSGALG00000014956	1		ENSGALG00000005703	1		ENSGALG00000025776
AF243438.CDS85.S1_s_at	ENSGALG00000010521	1	4	22	250587	250605	CTCTTTTATTTTGCTGCAG	0.023	36.2	100		ENSGALG00000028284	1		ENSGALG00000006599	2		ENSGALG00000010371	1		ENSGALG00000022956
AF243438.CDS86.S1_s_at	ENSGALG00000016281	1	6	22	591880	591864	ATGCTAGACCACAAGAT	0.29	32.5	100		ENSGALG00000003310	1		ENSGALG00000008750	1		ENSGALG00000008091	1		ENSGALG00000013461
AF243438.CDS87.S1_s_at	ENSGALG00000006976	1	2	20	13266	13248	CATCTACTTCACAACTCTG	0.023	36.2	100		ENSGALG00000014405	1		ENSGALG00000016990	3		ENSGALG00000002106	1		ENSGALG00000010881
AF243438.CDS88.S1_s_at	ENSGALG00000016974	1	1	23	5817	5794	CCAGGGCAATGGGAACAGCA-ATC	0.006	38.1	95.83		ENSGALG00000006837	3		ENSGALG00000013715	2		ENSGALG00000011291	1		ENSGALG00000006188
AF243438.CDS9.S1_s_at	ENSGALG00000010325	1	1	23	61365	61387	TTTGTGATCTCTTA-TCCTATACC	0.29	32.5	91.67		ENSGALG00000008805	1		ENSGALG00000001895	2		ENSGALG00000004819	1		ENSGALG00000026546
AF243438.CDS90.S1_s_at	ENSGALG00000017003	1	2	23	1328	1307	CATCTGCGCAGGACTCTGAGGG	0.023	36.2	95.45		ENSGALG00000004078	1		ENSGALG00000007533	1		ENSGALG00000028284	1		ENSGALG00000009219
AF243438.CDS91.S1_s_at	ENSGALG00000009403	1	1	18	158275	158258	TTATGATATACTTTCTGC	0.081	34.4	100		ENSGALG00000017627	2		ENSGALG00000016388	2		ENSGALG00000016734	1		ENSGALG00000002535
AF243438.CDS92.S1_s_at	ENSGALG00000015878	1	9	25	940	956	CCTCATGCATACCCCAT	0.29	32.5	100		ENSGALG00000008519	5		ENSGALG00000012105	1		ENSGALG00000015032	1		ENSGALG00000023032
AF243438.CDS93.S1_s_at	ENSGALG00000006059	1	5	22	68989	68972	TTTCTGGTAATGCTCCAC	0.081	34.4	100		ENSGALG00000005452	3		ENSGALG00000001183	3		ENSGALG00000029135	1		ENSGALG00000024122
AF243438.CDS94.S1_s_at	ENSGALG00000014361	1	1	25	5300	5274	GCTTGCACTTGAT--CCATACTGTACA	0.006	38.1	92.59		ENSGALG00000005282	3		ENSGALG00000006270	2		ENSGALG00000004224	1		ENSGALG00000027408
AF243438.CDS95.S1_s_at	ENSGALG00000011128	1	3	21	11061	11043	CAAAATCTGAACTCCCATG	0.023	36.2	100		ENSGALG00000019178	5		ENSGALG00000017016	1		ENSGALG00000016058	1		ENSGALG00000006106
AF243438.CDS96.S1_s_at	ENSGALG00000011248	1	2	19	74079	74062	TTTCACTAGTTGTTCTAT	0.081	34.4	100		ENSGALG00000009650	4		ENSGALG00000005703	1		ENSGALG00000016768	1		ENSGALG00000025869
AF243438.CDS97.S1_s_at	ENSGALG00000015033	1	7	24	62324	62341	CTCCTTCAGATGTTATTG	0.081	34.4	100		ENSGALG00000016611	3		ENSGALG00000010002	2		ENSGALG00000006837	1		ENSGALG00000026188
AF243438.CDS99.S1_at	ENSGALG00000015833	1	2	25	1379	1357	CACATTCTTCTCCCATTATCATTG	0.006	38.1	95.83		ENSGALG00000002544	2		ENSGALG00000014646	1		ENSGALG00000008783	1		ENSGALG00000026503
AF243438.CDS99.S1_s_at	ENSGALG00000011833	1	8	24	144364	144348	CTACTGCCCTTTGAAAA	0.29	32.5	100		ENSGALG00000003165	2		ENSGALG00000008091	1		ENSGALG00000029090	1		ENSGALG00000023846
AF262571.CDS1.S1_s_at	ENSGALG00000027207	1	9	25	6968	6952	ACACAGCCTCTCAGAAT	0.29	32.5	100		ENSGALG00000002435	1		ENSGALG00000010371	2		ENSGALG00000008805	1		ENSGALG00000021275
AFFX-BioB-3_at	ENSGALG00000025892	1	1	25	413	390	ACAGGCGCTGATGACCCCGGACACC	0.081	34.4	92		ENSGALG00000012098	4		ENSGALG00000002106	1		ENSGALG00000010572	1		ENSGALG00000028855
AFFX-BioB-5_at	ENSGALG00000017197	2	3	24	146236	146257	TGTCGCAAGTCACAGAATTATT	0.023	36.2	95.45		ENSGALG00000000818	2		ENSGALG00000004819	3		ENSGALG00000004833	1		ENSGALG00000028774
AFFX-BioB-M_at	ENSGALG00000013817	1	6	24	115369	115351	AACATGCTGGTGAAGGTGA	0.023	36.2	100		ENSGALG00000002267	1		ENSGALG00000011291	2		ENSGALG00000016870	1		ENSGALG00000026032
AFFX-BioC-3_at	ENSGALG00000016197	1	3	24	54549	54569	TGAAATCGAACAGTCGCTGAAC	0.081	34.4	95.45		ENSGALG00000011241	1		ENSGALG00000016734	1		ENSGALG00000008519	1		ENSGALG00000028567
AFFX-BioC-5_at	ENSGALG00000011406	1	8	25	22486	22469	TATGAGCAACATGCAGAT	0.081	34.4	100		ENSGALG00000009089	2		ENSGALG00000029135	1		ENSGALG00000005282	1		ENSGALG00000024328
AFFX-BioDn-3_at	ENSGALG00000008135	3	7	24	77165	77182	GCTGCTGGGAGAGATCCC	0.081	34.4	100		ENSGALG00000010933	1		ENSGALG00000015032	4		ENSGALG00000019178	1		ENSGALG00000008689
AFFX-BioDn-5_at	ENSGALG00000005396	2	4	25	48102	48123	TACAGCGCAACAGCAGCCTGCA	0.023	36.2	95.45		ENSGALG00000001333	3		ENSGALG00000028284	2		ENSGALG00000009650	1		ENSGALG00000002351
AFFX-CreX-3_at	ENSGALG00000021634	1	1	24	3343	3368	CTGGT-CTGGACACAGTGCCC-GTGT	0.023	36.2	92.31		ENSGALG00000023653	2		ENSGALG00000004224	8		ENSGALG00000016611	1		ENSGALG00000028903
AFFX-CreX-5_at	ENSGALG00000004328	1	2	19	10172	10189	CAACATTTGGGCCAGCTA	0.081	34.4	100		ENSGALG00000004829	3		ENSGALG00000016768	1		ENSGALG00000005236	1		ENSGALG00000016500
AFFX-DapX-3_at	ENSGALG00000017091	1	1	19	15611	15593	GATAAATGGTTTTCATCAG	0.023	36.2	100		ENSGALG00000015351	2		ENSGALG00000016058	2		ENSGALG00000009687	1		ENSGALG00000001252
AFFX-DapX-5_at	ENSGALG00000012181	1	6	24	10363	10381	TCAGATGCTTTCATTTACA	0.023	36.2	100		ENSGALG00000010350	2		ENSGALG00000006837	1		ENSGALG00000002544	1		ENSGALG00000009426
AFFX-DapX-M_at	ENSGALG00000002022	1	4	23	15637	15656	CTGACGTTCTTGCTTTTGGC	0.006	38.1	100		ENSGALG00000010049	3		ENSGALG00000008783	1		ENSGALG00000002435	1		ENSGALG00000003901
AFFX-Gga-actin-3_at	ENSGALG00000009621	11	1	25	2716	2740	AACAAGACGAGATTGGCATGGCTTT	1e-05	47.3	100		ENSGALG00000007691	2		ENSGALG00000026153	2		ENSGALG00000011875	1		ENSGALG00000016338
AFFX-Gga-actin-5_a_at	ENSGALG00000009621	11	1	25	29	53	ATATTGCTGCGCTCGTTGTTGACAA	1e-05	47.3	100		ENSGALG00000004946	1		ENSGALG00000029090	1		ENSGALG00000012098	1		ENSGALG00000009714
AFFX-Gga-actin-M_at	ENSGALG00000009621	10	1	25	2061	2085	ACAGTGCTGTCTGGTGGTACCACAA	1e-05	47.3	100		ENSGALG00000010674	1		ENSGALG00000008805	1		ENSGALG00000011241	1		ENSGALG00000026797
AFFX-Gga-ef1a-3_s_at	ENSGALG00000015917	11	1	25	3003	3027	AGAAGATTGATCGTCGTTCCGGCAA	1e-05	47.3	100		ENSGALG00000006971	3		ENSGALG00000010572	2		ENSGALG00000003304	1		ENSGALG00000028369
AFFX-Gga-ef1a-5_s_at	ENSGALG00000015917	11	1	25	1237	1261	GGTTCCTTCAAATATGCCTGGGTCT	1e-05	47.3	100		ENSGALG00000011429	1		ENSGALG00000004833	1		ENSGALG00000009089	1		ENSGALG00000006876
AFFX-Gga-ef1a-M_s_at	ENSGALG00000015917	10	1	25	1728	1752	GAGATCGTCAAGGAAGTCAGCACTT	1e-05	47.3	100		ENSGALG00000003519	1		ENSGALG00000016870	2		ENSGALG00000001333	1		ENSGALG00000028048
AFFX-Gga-gapdh-3_a_at	ENSGALG00000014442	11	1	25	2568	2592	GTTTGGATACAGCAACCGTGTTGTG	1e-05	47.3	100		ENSGALG00000010961	2		ENSGALG00000014643	1		ENSGALG00000010933	1		ENSGALG00000028926
AFFX-Gga-gapdh-3_x_at	ENSGALG00000014442	11	1	25	2133	2157	ATTCCTCCACCTTTGATGCGGGTGC	1e-05	47.3	100		ENSGALG00000009904	1		ENSGALG00000008519	1		ENSGALG00000000255	1		ENSGALG00000028740
AFFX-Gga-gapdh-5_a_at	ENSGALG00000014442	11	1	25	57	81	AGTGGTGGCCATCAATGATCCCTTC	1e-05	47.3	100		ENSGALG00000003628	2		ENSGALG00000005282	1		ENSGALG00000004829	1		ENSGALG00000028353
AFFX-Gga-gapdh-M_a_at	ENSGALG00000014442	10	1	25	845	869	GTGGTGCTAAGCGTGTTATCATCTC	1e-05	47.3	100		ENSGALG00000024040	1		ENSGALG00000019178	2		ENSGALG00000015351	1		ENSGALG00000015191
AFFX-Gga-r2-Bs-dap-3_at	ENSGALG00000015896	1	1	25	34687	34710	ATGGTTTTCATCAGCCGGATTTTGT	0.081	34.4	92		ENSGALG00000015093	1		ENSGALG00000009650	5		ENSGALG00000014779	1		ENSGALG00000001109
AFFX-Gga-r2-Bs-dap-5_at	ENSGALG00000012181	1	4	22	10363	10381	TCAGATGCTTTCATTTACA	0.023	36.2	100		ENSGALG00000023347	1		ENSGALG00000016611	4		ENSGALG00000018686	1		ENSGALG00000009544
AFFX-Gga-r2-Bs-dap-M_at	ENSGALG00000002022	1	6	25	15637	15656	CTGACGTTCTTGCTTTTGGC	0.006	38.1	100		ENSGALG00000026282	1		ENSGALG00000005236	1		ENSGALG00000006016	1		ENSGALG00000012602
AFFX-Gga-r2-Bs-lys-3_at	ENSGALG00000010668	1	2	19	41466	41483	ATTCATATTCATTTGTAT	0.081	34.4	100		ENSGALG00000009514	3		ENSGALG00000009687	3		ENSGALG00000007691	1		ENSGALG00000028116
AFFX-Gga-r2-Bs-lys-5_at	ENSGALG00000012677	1	6	25	321637	321656	TTTATTTCTGCAGGGCTGAA	0.006	38.1	100		ENSGALG00000010277	1		ENSGALG00000002544	2		ENSGALG00000006971	1		ENSGALG00000009941
AFFX-Gga-r2-Bs-lys-M_at	ENSGALG00000020092	1	7	23	397945	397929	ATCGCGCTTCTTGAAGA	0.29	32.5	100		ENSGALG00000012236	3		ENSGALG00000023542	2		ENSGALG00000004946	1		ENSGALG00000001754
AFFX-Gga-r2-Bs-phe-3_at	ENSGALG00000001766	1	6	25	14592	14611	GAGTGCTGTCTGCATTTTCT	0.006	38.1	100		ENSGALG00000015902	1		ENSGALG00000002435	1		ENSGALG00000010843	1		ENSGALG00000022247
AFFX-Gga-r2-Bs-phe-5_at	ENSGALG00000026600	1	6	24	2867	2849	TGCTGTTTTTCCATTCTAC	0.023	36.2	100		ENSGALG00000010561	1		ENSGALG00000026357	1		ENSGALG00000011429	1		ENSGALG00000025895
AFFX-Gga-r2-Bs-phe-M_at	ENSGALG00000013753	1	7	25	19301	19319	GTCAGTTCTTGTTTTCAAA	0.023	36.2	100		ENSGALG00000006524	1		ENSGALG00000012098	1		ENSGALG00000002820	1		ENSGALG00000003819
AFFX-Gga-r2-Bs-thr-3_s_at	ENSGALG00000007769	1	5	25	23658	23678	TAGTCGTTGTCATTCCTTTTT	0.081	34.4	95.24		ENSGALG00000010320	2		ENSGALG00000011875	2		ENSGALG00000012245	1		ENSGALG00000006027
AFFX-Gga-r2-Bs-thr-5_s_at	ENSGALG00000009082	1	4	21	106	89	TCACCTGCCGAAGCTGTC	0.081	34.4	100		ENSGALG00000010791	1		ENSGALG00000011241	1		ENSGALG00000006525	1		ENSGALG00000021552
AFFX-Gga-r2-Bs-thr-M_s_at	ENSGALG00000005230	1	3	25	18933	18911	AAATCCTTCACGCATATCAGCTG	0.006	38.1	95.65		ENSGALG00000013303	2		ENSGALG00000003304	3		ENSGALG00000017135	1		ENSGALG00000016088
AFFX-Gga-r2-Ec-bioB-3_at	ENSGALG00000006638	1	2	19	2954	2937	CAACAGCAACGTCTTGAA	0.081	34.4	100		ENSGALG00000005258	2		ENSGALG00000009089	2		ENSGALG00000010961	1		ENSGALG00000026476
AFFX-Gga-r2-Ec-bioB-5_at	ENSGALG00000016886	1	8	25	86670	86653	GTCAGGTGCAGGTCAGCA	0.081	34.4	100		ENSGALG00000027199	2		ENSGALG00000001333	3		ENSGALG00000003628	1		ENSGALG00000023868
AFFX-Gga-r2-Ec-bioB-M_at	ENSGALG00000004696	1	4	20	325	341	GCTGGGCACGTTGAGTG	0.29	32.5	100		ENSGALG00000005060	1		ENSGALG00000010933	2		ENSGALG00000023719	1		ENSGALG00000027036
AFFX-Gga-r2-Ec-bioC-3_at	ENSGALG00000027785	1	4	24	18667	18687	GATGATGCGCTCAGTGCCATG	0.081	34.4	95.24		ENSGALG00000011350	1		ENSGALG00000020092	15		ENSGALG00000024040	1		ENSGALG00000028197
AFFX-Gga-r2-Ec-bioD-3_at	ENSGALG00000001971	1	2	22	35544	35565	GCTGGGAGAGATCCCC-TGGCT	0.081	34.4	95.45		ENSGALG00000002286	1		ENSGALG00000000255	4		ENSGALG00000015093	1		ENSGALG00000005667
AFFX-Gga-r2-Ec-bioD-5_at	ENSGALG00000001437	1	7	23	40475	40459	ACAGCGCAACAGCAGCC	0.29	32.5	100		ENSGALG00000002083	3		ENSGALG00000004829	5		ENSGALG00000026282	1		ENSGALG00000007961
AFFX-Gga-r2-P1-cre-3_s_at	ENSGALG00000014783	2	3	20	90974	90991	CTCTGGTGTAGCTGATGA	0.081	34.4	100		ENSGALG00000005753	4		ENSGALG00000015351	1		ENSGALG00000009514	1		ENSGALG00000006633
AFFX-Gga-r2-P1-cre-5_s_at	ENSGALG00000004328	1	8	25	10172	10189	CAACATTTGGGCCAGCTA	0.081	34.4	100		ENSGALG00000008953	4		ENSGALG00000014779	3		ENSGALG00000003016	1		ENSGALG00000026942
AFFX-Gga-TrpnX-3_at	ENSGALG00000011639	1	1	25	14569	14545	GACGTCATTCAGCTTCACGGTGATG	0.0005	41.7	96		ENSGALG00000015108	1		ENSGALG00000028437	1		ENSGALG00000010277	1		ENSGALG00000021092
AFFX-Gga-TrpnX-5_at	ENSGALG00000011239	1	1	17	13311	13295	GATATTGTCAATTCTTG	0.29	32.5	100		ENSGALG00000001764	1		ENSGALG00000018686	3		ENSGALG00000012236	1		ENSGALG00000021496
AFFX-Gga-TrpnX-M_at	ENSGALG00000021819	1	3	19	19690	19674	GAATTACCGCCTCACTG	0.29	32.5	100		ENSGALG00000012545	1		ENSGALG00000020879	1		ENSGALG00000011096	1		ENSGALG00000028997
AFFX-LysX-3_at	ENSGALG00000010668	2	8	25	41466	41483	ATTCATATTCATTTGTAT	0.081	34.4	100		ENSGALG00000008445	4		ENSGALG00000006016	5		ENSGALG00000015902	1		ENSGALG00000009520
AFFX-LysX-5_at	ENSGALG00000012677	2	1	20	321637	321656	TTTATTTCTGCAGGGCTGAA	0.006	38.1	100		ENSGALG00000010167	2		ENSGALG00000007691	3		ENSGALG00000006524	1		ENSGALG00000009870
AFFX-LysX-M_at	ENSGALG00000006220	2	4	25	102075	102053	TCAGCTG-CTGGGTGTCCATTGC	0.023	36.2	95.65		ENSGALG00000004952	1		ENSGALG00000004946	1		ENSGALG00000015444	1		ENSGALG00000003428
AFFX-PheX-3_at	ENSGALG00000008255	1	1	22	6103	6125	CTGCAT-AGAGTGCTGTCTGCAT	0.023	36.2	95.65		ENSGALG00000027192	1		ENSGALG00000006971	1		ENSGALG00000011671	1		ENSGALG00000005960
AFFX-PheX-5_at	ENSGALG00000007527	1	2	20	43031	43049	CTTTCCATTCACCAGACCA	0.023	36.2	100		ENSGALG00000006329	1		ENSGALG00000018512	3		ENSGALG00000002561	1		ENSGALG00000021854
AFFX-PheX-M_at	ENSGALG00000005065	2	6	24	49994	50012	TAGATGCAGCCGTTGCAGG	0.023	36.2	100		ENSGALG00000004960	3		ENSGALG00000010843	2		ENSGALG00000010320	1		ENSGALG00000028579
AFFX-r2-Bs-dap-3_at	ENSGALG00000015776	1	9	25	5816	5800	CATAAAGTCAGCAAGGT	0.29	32.5	100		ENSGALG00000005736	2		ENSGALG00000011429	1		ENSGALG00000027199	1		ENSGALG00000001875
AFFX-r2-Bs-dap-5_at	ENSGALG00000000998	1	6	22	1176	1192	CTGATGTGATGCCTGTT	0.29	32.5	100		ENSGALG00000008872	3		ENSGALG00000002820	1		ENSGALG00000013001	1		ENSGALG00000002224
AFFX-r2-Bs-dap-M_at	ENSGALG00000022909	1	7	23	109354	109370	TTGATCAGCTTGTGTAT	0.29	32.5	100		ENSGALG00000005419	2		ENSGALG00000006806	1		ENSGALG00000015531	1		ENSGALG00000015134
AFFX-r2-Bs-lys-3_at	ENSGALG00000007658	2	2	24	72434	72413	ATTCATTTGTATCCAAGGTGCTG	0.023	36.2	95.65		ENSGALG00000006561	1		ENSGALG00000012245	1		ENSGALG00000015565	1		ENSGALG00000008908
AFFX-r2-Bs-lys-5_at	ENSGALG00000012677	1	8	25	321637	321654	TTTATTTCTGCAGGGCTG	0.081	34.4	100		ENSGALG00000023742	2		ENSGALG00000006525	1		ENSGALG00000008953	1		ENSGALG00000012017
AFFX-r2-Bs-lys-M_at	ENSGALG00000015768	1	2	22	11549	11528	CTTC-TTGAAGACCTATGTAAA	0.081	34.4	95.45		ENSGALG00000027146	1		ENSGALG00000017135	3		ENSGALG00000009287	1		ENSGALG00000028391
AFFX-r2-Bs-phe-3_at	ENSGALG00000015737	1	1	22	11812	11791	GTCTGCATTTTCTTGGAGAAAT	0.023	36.2	95.45		ENSGALG00000005512	2		ENSGALG00000010961	2		ENSGALG00000001764	1		ENSGALG00000023305
AFFX-r2-Bs-phe-5_at	ENSGALG00000012224	2	9	25	242606	242590	AGCAGATGCCGTTCAAA	0.29	32.5	100		ENSGALG00000004517	1		ENSGALG00000003628	5		ENSGALG00000012545	1		ENSGALG00000027666
AFFX-r2-Bs-phe-M_at	ENSGALG00000014854	2	8	25	4168	4151	TACACATCTAGCAGTCAG	0.081	34.4	100		ENSGALG00000012076	2		ENSGALG00000023719	1		ENSGALG00000010167	1		ENSGALG00000021346
AFFX-r2-Bs-thr-3_s_at	ENSGALG00000007769	1	5	25	23658	23678	TAGTCGTTGTCATTCCTTTTT	0.081	34.4	95.24		ENSGALG00000004679	1		ENSGALG00000015093	1		ENSGALG00000004952	1		ENSGALG00000007864
AFFX-r2-Bs-thr-M_s_at	ENSGALG00000005230	1	3	25	18933	18911	AAATCCTTCACGCATATCAGCTG	0.006	38.1	95.65		ENSGALG00000000463	1		ENSGALG00000024040	3		ENSGALG00000027192	1		ENSGALG00000029136
AFFX-r2-Ec-bioB-3_at	ENSGALG00000006638	1	2	19	2954	2937	CAACAGCAACGTCTTGAA	0.081	34.4	100		ENSGALG00000002527	1		ENSGALG00000026282	2		ENSGALG00000008445	1		ENSGALG00000016760
AFFX-r2-Ec-bioB-5_at	ENSGALG00000013875	2	3	20	1934	1951	TGGATCTGCTGTTTGAAG	0.081	34.4	100		ENSGALG00000015015	1		ENSGALG00000009514	1		ENSGALG00000005419	1		ENSGALG00000028207
AFFX-r2-Ec-bioB-M_at	ENSGALG00000004696	2	9	25	325	341	GCTGGGCACGTTGAGTG	0.29	32.5	100		ENSGALG00000005425	3		ENSGALG00000010277	2		ENSGALG00000004333	1		ENSGALG00000007559
AFFX-r2-Ec-bioC-3_at	ENSGALG00000011739	1	2	18	3024	3040	ACGCTGTGGTTTGATGA	0.29	32.5	100		ENSGALG00000008060	2		ENSGALG00000003016	3		ENSGALG00000005512	1		ENSGALG00000015244
AFFX-r2-Ec-bioC-5_at	ENSGALG00000016602	1	7	23	70335	70351	GATCTTGCATGGAGCAA	0.29	32.5	100		ENSGALG00000004888	1		ENSGALG00000012236	2		ENSGALG00000023742	1		ENSGALG00000006919
AFFX-r2-Ec-bioD-3_at	ENSGALG00000001971	1	2	22	35544	35565	GCTGGGAGAGATCCCC-TGGCT	0.081	34.4	95.45		ENSGALG00000004594	2		ENSGALG00000015902	2		ENSGALG00000003130	1		ENSGALG00000004818
AFFX-r2-Ec-bioD-5_at	ENSGALG00000013785	1	4	24	52819	52799	ACACCTTCGCAGAACCCACTT	0.081	34.4	95.24		ENSGALG00000028322	1		ENSGALG00000011096	2		ENSGALG00000008887	1		ENSGALG00000015391
AFFX-r2-P1-cre-3_at	ENSGALG00000015688	1	9	25	28925	28909	AATAACTACCTGTTTTG	0.29	32.5	100		ENSGALG00000003720	1		ENSGALG00000015444	2		ENSGALG00000004655	1		ENSGALG00000024104
AFFX-r2-P1-cre-5_at	ENSGALG00000012913	1	3	20	10970	10987	GAAATGGTTTCCCGCAGA	0.081	34.4	100		ENSGALG00000006318	1		ENSGALG00000006524	1		ENSGALG00000001590	1		ENSGALG00000025971
AFFX-r2-TagA_at	ENSGALG00000012329	1	5	25	156848	156867	CAGATCTTAGCACTCGTGCAG	0.29	32.5	95.24		ENSGALG00000005192	1		ENSGALG00000002561	1		ENSGALG00000002527	1		ENSGALG00000015652
AFFX-r2-TagB_at	ENSGALG00000012424	1	7	23	135233	135249	CCAGAGTTATGTTTGAG	0.29	32.5	100		ENSGALG00000013569	1		ENSGALG00000011671	1		ENSGALG00000001807	1		ENSGALG00000029154
AFFX-r2-TagC_at	ENSGALG00000000273	1	3	20	35785	35768	GTGCCTAAGTAATCTGGT	0.081	34.4	100		ENSGALG00000002616	3		ENSGALG00000010320	3		ENSGALG00000011342	1		ENSGALG00000016669
AFFX-r2-TagE_at	ENSGALG00000017112	1	4	23	9751	9770	TCCTGCACGTTAGAACACTG	0.006	38.1	100		ENSGALG00000012588	1		ENSGALG00000027199	1		ENSGALG00000008060	1		ENSGALG00000008155
AFFX-r2-TagG_at	ENSGALG00000005351	1	8	25	68371	68388	GAATGTGTCTGTAATGCC	0.081	34.4	100		ENSGALG00000027983	2		ENSGALG00000015531	3		ENSGALG00000010858	1		ENSGALG00000021226
AFFX-r2-TagH_at	ENSGALG00000014977	1	5	22	32290	32273	GCCATGTCTGTCAACTGT	0.081	34.4	100		ENSGALG00000007462	1		ENSGALG00000013001	5		ENSGALG00000015490	1		ENSGALG00000008555
AFFX-r2-TagIN-3_at	ENSGALG00000016537	1	1	17	40156	40140	GACAGCAGCTCAGCATC	0.29	32.5	100		ENSGALG00000023601	1		ENSGALG00000015565	3		ENSGALG00000008199	1		ENSGALG00000019229
AFFX-r2-TagIN-5_at	ENSGALG00000027707	1	8	24	613	629	GTGCGAAATACGCGGTC	0.29	32.5	100		ENSGALG00000015679	1		ENSGALG00000009287	1		ENSGALG00000003720	1		ENSGALG00000028283
AFFX-r2-TagIN-M_at	ENSGALG00000006473	1	1	20	316853	316834	CACTATGCCACCTCTGGTCT	0.006	38.1	100		ENSGALG00000004900	3		ENSGALG00000008953	1		ENSGALG00000006318	1		ENSGALG00000006941
AFFX-r2-TagJ-3_at	ENSGALG00000028673	1	4	23	22701	22682	TCTCTCTTAGCATAGTGTCC	0.29	32.5	95		ENSGALG00000015617	1		ENSGALG00000017291	5		ENSGALG00000008301	1		ENSGALG00000028784
AFFX-r2-TagO-3_at	ENSGALG00000016850	1	2	20	3883	3865	AGTGCTACGCCTAAACTGG	0.023	36.2	100		ENSGALG00000007950	1		ENSGALG00000001764	3		ENSGALG00000013953	1		ENSGALG00000003024
AFFX-r2-TagO-5_at	ENSGALG00000014974	1	5	21	18695	18679	CTAACTGATACACGCTG	0.29	32.5	100		ENSGALG00000004693	1		ENSGALG00000012545	1		ENSGALG00000015679	1		ENSGALG00000018274
AFFX-r2-TagQ-3_at	ENSGALG00000006819	1	3	23	97131	97111	CACTGCTGGTCTGCGAATGAC	0.081	34.4	95.24		ENSGALG00000023787	1		ENSGALG00000008445	2		ENSGALG00000007546	1		ENSGALG00000026817
AFFX-r2-TagQ-5_at	ENSGALG00000014812	1	3	20	4761	4778	AGAACCTCAGCTCATCAT	0.081	34.4	100		ENSGALG00000007962	1		ENSGALG00000004952	1		ENSGALG00000000194	1		ENSGALG00000028350
AFFX-ThrX-3_at	ENSGALG00000016810	1	7	25	136803	136821	TCCTTTTTATGAAGTGCTG	0.023	36.2	100		ENSGALG00000002908	2		ENSGALG00000027192	2		ENSGALG00000004693	1		ENSGALG00000025985
AFFX-ThrX-5_at	ENSGALG00000006494	1	1	19	44541	44523	GCTGGAAACATCACTGCGT	0.023	36.2	100		ENSGALG00000016296	1		ENSGALG00000010167	2		ENSGALG00000002908	1		ENSGALG00000010732
AFFX-ThrX-M_at	ENSGALG00000002585	1	7	25	36109	36091	GACATTTCAGAAATCAAGC	0.023	36.2	100		ENSGALG00000016187	1		ENSGALG00000023982	3		ENSGALG00000016296	1		ENSGALG00000014515
AFFX-TrpnX-3_at	ENSGALG00000011639	1	4	25	14569	14548	GACGTCATTCAGCTTCACGGTG	0.023	36.2	95.45		ENSGALG00000005251	1		ENSGALG00000013430	1		ENSGALG00000007962	1		ENSGALG00000013568
AFFX-TrpnX-5_at	ENSGALG00000001442	1	3	22	83981	84000	CAGGCAGGTGCTGGCATTGT	0.006	38.1	100		ENSGALG00000021692	1		ENSGALG00000005419	1		ENSGALG00000021692	1		ENSGALG00000000160
AFFX-TrpnX-M_at	ENSGALG00000017652	1	1	22	22156	22176	TTTTGTGCCTGTGCAGATTGCA	0.081	34.4	95.45		ENSGALG00000006160	3		ENSGALG00000004333	1		ENSGALG00000004283	1		ENSGALG00000009909
AJ457967.CDS1.S1_s_at	ENSGALG00000013674	1	8	25	45472	45489	CTGTGAGGGTGAACTGCA	0.081	34.4	100		ENSGALG00000011393	1		ENSGALG00000028819	1		ENSGALG00000011884	1		ENSGALG00000026446
AJ457967.CDS2.S1_s_at	ENSGALG00000002327	1	7	24	206960	206943	CCACAGAGCCAGGCACCA	0.081	34.4	100		ENSGALG00000003625	1		ENSGALG00000005512	2		ENSGALG00000001668	1		ENSGALG00000020661
AY013303.CDS1.S1_s_at	ENSGALG00000004813	2	4	23	26226	26245	AGTGTGCCTGCCTTGCCTTT	0.006	38.1	100		ENSGALG00000004244	1		ENSGALG00000023742	3		ENSGALG00000029022	1		ENSGALG00000026541
AY013303.CDS2.S1_s_at	ENSGALG00000012447	1	8	24	18125	18109	CAGCAGGCTAGGGAGGT	0.29	32.5	100		ENSGALG00000000430	1		ENSGALG00000003130	1		ENSGALG00000004244	1		ENSGALG00000010401
AY013303.CDS3.S1_s_at	ENSGALG00000017254	1	9	25	696640	696624	GGCCAGTGATGGAGGCC	0.29	32.5	100		ENSGALG00000008364	1		ENSGALG00000028340	2		ENSGALG00000000430	1		ENSGALG00000016405
AY394492.CDS1.S1_s_at	ENSGALG00000005077	1	3	23	3013	2993	GGCAGCAGGGTCATAGAATCA	0.002	39.9	100		ENSGALG00000012111	2		ENSGALG00000004853	1		ENSGALG00000002606	1		ENSGALG00000026391
AY436597.CDS1.S1_at	ENSGALG00000004978	1	8	25	6400	6417	GGCAGGTGGTGGTTTCCT	0.081	34.4	100		ENSGALG00000010678	2		ENSGALG00000008887	2		ENSGALG00000010678	1		ENSGALG00000023973
AY436609.CDS1.S1_at	ENSGALG00000016285	1	1	22	27895	27916	ATCCTGGCGATTTGACAGCAGT	0.023	36.2	95.45		ENSGALG00000015485	1		ENSGALG00000001590	1		ENSGALG00000015485	1		ENSGALG00000027892
AY510475.CDS10.S1_s_at	ENSGALG00000015630	1	4	21	211332	211349	TTTCTGCCGTAGTATTTA	0.081	34.4	100		ENSGALG00000011846	1		ENSGALG00000002527	1		ENSGALG00000009528	1		ENSGALG00000008794
AY510475.CDS18.S1_s_at	ENSGALG00000023742	1	4	25	8361	8382	GCCATGGCTTTTTGTTCATACC	0.023	36.2	95.45		ENSGALG00000017169	1		ENSGALG00000004655	3		ENSGALG00000017169	1		ENSGALG00000001212
AY510475.CDS3.S1_at	ENSGALG00000003852	1	6	23	1090	1073	AGGGATGCACAGAGCTCG	0.081	34.4	100		ENSGALG00000004304	3		ENSGALG00000001807	13		ENSGALG00000004304	1		ENSGALG00000011184
AY510475.CDS4.S1_at	ENSGALG00000005160	6	1	25	27390	27366	ATTTACTCCATCTAGTTGTTCTGTG	1e-05	47.3	100		ENSGALG00000016152	2		ENSGALG00000011342	4		ENSGALG00000001938	1		ENSGALG00000023603
AY510475.CDS45.S1_s_at	ENSGALG00000009380	1	3	21	90208	90190	AAACCATATCATGCTCTAT	0.023	36.2	100		ENSGALG00000001938	2		ENSGALG00000008060	1		ENSGALG00000027860	1		ENSGALG00000016551
AY510475.CDS56.S1_s_at	ENSGALG00000007254	1	1	21	1758	1778	GTAGTAGCTTGTCTGCTGTCA	0.002	39.9	100		ENSGALG00000004749	1		ENSGALG00000010858	3		ENSGALG00000004749	1		ENSGALG00000000412
AY510475.CDS6.S1_s_at	ENSGALG00000011906	1	1	18	158024	158041	TGACAACCCCATATTTTG	0.081	34.4	100		ENSGALG00000027860	1		ENSGALG00000015490	2		ENSGALG00000026267	1		ENSGALG00000027205
AY510475.CDS65.S1_s_at	ENSGALG00000015071	1	1	20	35619	35638	GTTCTGTAGCATTGTTTCCA	0.006	38.1	100		ENSGALG00000003575	1		ENSGALG00000008199	10		ENSGALG00000021174	1		ENSGALG00000028293
AY510475.CDS8.S1_s_at	ENSGALG00000016412	1	9	25	11327	11311	GGGCAGAATACAACTTT	0.29	32.5	100		ENSGALG00000010598	1		ENSGALG00000004794	1		ENSGALG00000011930	1		ENSGALG00000026574
AY510475.CDS81.S1_s_at	ENSGALG00000010772	1	2	20	117775	117757	CAACCCTTGTAACTATTAT	0.023	36.2	100		ENSGALG00000026267	1		ENSGALG00000003720	2		ENSGALG00000006694	1		ENSGALG00000026525
AY510475.CDS9.S1_s_at	ENSGALG00000004224	1	5	22	26431	26414	TTCTACTACGCCATGTTA	0.081	34.4	100		ENSGALG00000003179	1		ENSGALG00000006318	1		ENSGALG00000005872	1		ENSGALG00000012238
AY562987.CDS1.S1_at	ENSGALG00000005282	1	3	21	5416	5434	CAGCATGGATGTTCCTACT	0.023	36.2	100		ENSGALG00000011930	3		ENSGALG00000008301	1		ENSGALG00000000227	1		ENSGALG00000000903
AY562987.CDS2.S1_at	ENSGALG00000002090	1	2	18	8272	8256	AGCTAGATGCAGCCAAG	0.29	32.5	100		ENSGALG00000009903	2		ENSGALG00000026129	1		ENSGALG00000007431	1		ENSGALG00000012404
AY562987.CDS3.S1_at	ENSGALG00000007038	1	7	25	91570	91552	GTCATCATTCAGGCAGGCA	0.023	36.2	100		ENSGALG00000006694	5		ENSGALG00000019164	2		ENSGALG00000006724	1		ENSGALG00000003922
AY562987.CDS4.S1_at	ENSGALG00000015799	1	2	18	25005	24989	AAGGTGCACTCACTACA	0.29	32.5	100		ENSGALG00000003663	3		ENSGALG00000013953	1		ENSGALG00000002631	1		ENSGALG00000027818
AY562987.CDS5.S1_at	ENSGALG00000019570	1	2	18	41791	41807	GAACATCTCATTTCTTG	0.29	32.5	100		ENSGALG00000002631	1		ENSGALG00000015679	1		ENSGALG00000001267	1		ENSGALG00000013442
AY562987.CDS6.S1_at	ENSGALG00000004435	1	8	25	15688	15705	GATCTACATGGAAGCCGA	0.081	34.4	100		ENSGALG00000001267	2		ENSGALG00000007546	1		ENSGALG00000010287	1		ENSGALG00000022280
AY562989.CDS1.S1_at	ENSGALG00000016433	1	4	20	9184	9168	GAGTGGAGTATGCTCAG	0.29	32.5	100		ENSGALG00000010502	1		ENSGALG00000000194	1		ENSGALG00000002546	1		ENSGALG00000000136
AY562989.CDS2.S1_at	ENSGALG00000014261	1	7	25	2657	2639	CTTGTCTTGAAACAGACAT	0.023	36.2	100		ENSGALG00000010287	1		ENSGALG00000023297	1		ENSGALG00000009722	1		ENSGALG00000015612
AY562989.CDS2.S1_s_at	ENSGALG00000002677	1	8	25	25180	25197	GCCTTGCTCTAAATGGCT	0.081	34.4	100		ENSGALG00000004644	2		ENSGALG00000004693	3		ENSGALG00000011449	1		ENSGALG00000025923
AY562989.CDS3.S1_at	ENSGALG00000002658	1	3	20	34503	34520	CTGGCACCTTTTTTCTCT	0.081	34.4	100		ENSGALG00000011387	1		ENSGALG00000016296	1		ENSGALG00000011387	1		ENSGALG00000027514
AY562989.CDS4.S1_at	ENSGALG00000009704	1	1	22	5497	5475	ATCAGC-CTGCATGTACTCAAAG	0.023	36.2	95.65		ENSGALG00000002836	3		ENSGALG00000002908	2		ENSGALG00000007131	1		ENSGALG00000029004
AY562989.CDS5.S1_at	ENSGALG00000009784	1	6	22	4445	4461	TTAATGCTTTCACCCGG	0.29	32.5	100		ENSGALG00000004936	3		ENSGALG00000007962	4		ENSGALG00000000449	1		ENSGALG00000008638
AY562989.CDS6.S1_at	ENSGALG00000009788	1	4	21	8657	8640	GGCAGATCCTAGAGGTCA	0.081	34.4	100		ENSGALG00000007015	1		ENSGALG00000021692	3		ENSGALG00000002836	1		ENSGALG00000020778
AY579780.CDS4.S1_at	ENSGALG00000027689	1	2	19	6666	6649	ATGCTGACACTGTTACAA	0.081	34.4	100		ENSGALG00000017004	1		ENSGALG00000004283	3		ENSGALG00000016197	1		ENSGALG00000020392
Gga.10001.1.S1_at	ENSGALG00000014509	1	4	20	11773	11789	ATTTTGCTGTTAACTTC	0.29	32.5	100		ENSGALG00000003706	1		ENSGALG00000011884	1		ENSGALG00000005610	1		ENSGALG00000003243
Gga.10002.1.S1_at	ENSGALG00000015271	11	1	25	151425	151449	GGAATTACTCATACATCCATCTATT	1e-05	47.3	100		ENSGALG00000002239	2		ENSGALG00000001668	4		ENSGALG00000015017	1		ENSGALG00000028915
Gga.10005.1.S1_at	ENSGALG00000010882	11	1	25	6599	6623	GATGTAATGCTCTGTAAAGTGTGTG	1e-05	47.3	100		ENSGALG00000003845	1		ENSGALG00000029022	11		ENSGALG00000002239	1		ENSGALG00000021553
Gga.10006.1.S1_at	ENSGALG00000015353	1	7	25	51457	51439	ATGATCTTTACCAAGGACT	0.023	36.2	100		ENSGALG00000010365	3		ENSGALG00000004244	1		ENSGALG00000005308	1		ENSGALG00000026964
Gga.10009.1.S1_at	ENSGALG00000009983	8	1	25	1145	1169	GGTTCTTCAAGACAAACGCACTCGG	1e-05	47.3	100		ENSGALG00000001933	3		ENSGALG00000002606	1		ENSGALG00000005966	1		ENSGALG00000009385
Gga.10011.1.A1_at	ENSGALG00000005352	8	1	25	8584	8560	GAAGGAGAACCCATTCACAGCCCAG	1e-05	47.3	100		ENSGALG00000002981	3		ENSGALG00000000430	1		ENSGALG00000000507	1		ENSGALG00000024029
Gga.10011.1.S1_at	ENSGALG00000003239	8	1	25	4750	4726	CTGGCTCTGGTAGTCACACTGGTGA	1e-05	47.3	100		ENSGALG00000011783	1		ENSGALG00000010678	1		ENSGALG00000010365	1		ENSGALG00000017034
Gga.10012.1.S1_s_at	ENSGALG00000015693	1	5	23	23970	23952	CAACATTTCAGCTGAGACA	0.023	36.2	100		ENSGALG00000019060	1		ENSGALG00000015485	1		ENSGALG00000002981	1		ENSGALG00000028854
Gga.10016.1.S1_at	ENSGALG00000009936	11	1	25	6887	6911	TTATTTGCATACTGGGATTAGGTCA	1e-05	47.3	100		ENSGALG00000017075	4		ENSGALG00000017169	2		ENSGALG00000017075	1		ENSGALG00000011516
Gga.10019.2.S1_at	ENSGALG00000009035	11	1	25	3073	3097	TTCCCTTTCAGTCCCTATTCATAAA	1e-05	47.3	100		ENSGALG00000012415	1		ENSGALG00000009528	3		ENSGALG00000012415	1		ENSGALG00000008820
Gga.10025.1.S1_at	ENSGALG00000008885	1	5	25	101318	101338	GTTATTTCTGTCTAAGCTCTG	0.081	34.4	95.24		ENSGALG00000023781	2		ENSGALG00000004304	6		ENSGALG00000009279	1		ENSGALG00000010620
Gga.10027.1.S1_at	ENSGALG00000016424	2	1	25	13576	13600	GATATGTATGCAGACACCGTGACCA	1e-05	47.3	100		ENSGALG00000016843	5		ENSGALG00000001938	1		ENSGALG00000016843	1		ENSGALG00000019805
Gga.10031.1.S1_at	ENSGALG00000028422	11	1	25	16053	16077	TTGCATCATTCCTGCCTAGAGGGAC	1e-05	47.3	100		ENSGALG00000008291	1		ENSGALG00000004749	1		ENSGALG00000008291	1		ENSGALG00000003210
Gga.10032.1.A1_at	ENSGALG00000008607	11	1	25	16855	16831	GCAGCTCGTGCAGACATAGGCTTCG	1e-05	47.3	100		ENSGALG00000001937	2		ENSGALG00000027860	1		ENSGALG00000009863	1		ENSGALG00000024397
Gga.10034.3.S1_at	ENSGALG00000019552	11	1	25	8948	8924	GTATTTTACTTTACTCTGGTTCTGT	1e-05	47.3	100		ENSGALG00000008473	1		ENSGALG00000026267	1		ENSGALG00000002155	1		ENSGALG00000022324
Gga.10037.1.S1_s_at	ENSGALG00000005572	11	1	25	3256	3280	TCAGCCCATGAGATCCTTCAGAGGT	1e-05	47.3	100		ENSGALG00000001664	1		ENSGALG00000021174	1		ENSGALG00000008058	1		ENSGALG00000028254
Gga.10039.1.S1_at	ENSGALG00000007835	1	8	25	29758	29775	TCTTGCAACAGATGTTTA	0.081	34.4	100		ENSGALG00000007834	2		ENSGALG00000011930	1		ENSGALG00000006143	1		ENSGALG00000025767
Gga.1004.1.S1_at	ENSGALG00000016318	1	1	22	12867	12887	GTGACAGCCTGGAGTACATCAA	0.081	34.4	95.45		ENSGALG00000002318	1		ENSGALG00000006694	2		ENSGALG00000016254	1		ENSGALG00000026826
Gga.10040.1.S1_at	ENSGALG00000012303	1	3	24	97452	97432	TATATCGATTTTTACAGCATTT	0.081	34.4	95.45		ENSGALG00000002155	1		ENSGALG00000005872	2		ENSGALG00000002272	1		ENSGALG00000000365
Gga.10040.2.S1_at	ENSGALG00000001945	1	1	25	620	596	GAGCTCTCGGCCGAGAACGAGAAGC	0.023	36.2	92		ENSGALG00000013209	2		ENSGALG00000000227	4		ENSGALG00000002511	1		ENSGALG00000003850
Gga.10041.1.S1_a_at	ENSGALG00000002140	1	4	22	26384	26366	CTCACCCTTTGTACAAAAT	0.023	36.2	100		ENSGALG00000008058	1		ENSGALG00000007431	14		ENSGALG00000012536	1		ENSGALG00000006076
Gga.10041.2.A1_at	ENSGALG00000009340	1	5	25	260	280	TGCTCTGCTCCGGGATGCTCT	0.081	34.4	95.24		ENSGALG00000016254	1		ENSGALG00000006602	1		ENSGALG00000002040	1		ENSGALG00000018781
Gga.10044.1.S1_s_at	ENSGALG00000005657	1	7	25	79025	79007	CATCTGTTCAAGGACAAAG	0.023	36.2	100		ENSGALG00000011593	1		ENSGALG00000006724	3		ENSGALG00000010569	1		ENSGALG00000009545
Gga.10046.1.S1_at	ENSGALG00000006455	10	1	25	321	345	GTTTGCTCAGAGGTGCCACGATCTG	1e-05	47.3	100		ENSGALG00000002272	1		ENSGALG00000001267	1		ENSGALG00000002649	1		ENSGALG00000027759
Gga.10047.1.S1_at	ENSGALG00000017086	1	5	22	217812	217829	GTGTTTGAAGGCATCCCT	0.081	34.4	100		ENSGALG00000012446	2		ENSGALG00000002631	1		ENSGALG00000014226	1		ENSGALG00000009549
Gga.10048.1.S1_at	ENSGALG00000006975	1	1	25	131820	131794	TTTCA-GTT-CTGGCATTAGTCATTTT	0.006	38.1	92.59		ENSGALG00000002511	1		ENSGALG00000010287	1		ENSGALG00000012856	1		ENSGALG00000011678
Gga.10049.1.A1_at	ENSGALG00000001668	11	1	25	49263	49239	ACTCACAGATTCTGGGTGCTGGCAA	1e-05	47.3	100		ENSGALG00000001233	2		ENSGALG00000009722	8		ENSGALG00000020084	1		ENSGALG00000010125
Gga.10049.1.S1_at	ENSGALG00000001668	11	1	25	49081	49105	AAAGGCCTTGGCAGTTCAGCACAGG	1e-05	47.3	100		ENSGALG00000001006	2		ENSGALG00000002546	3		ENSGALG00000008347	1		ENSGALG00000006438
Gga.1005.1.S1_s_at	ENSGALG00000004898	1	3	22	2257	2238	CTGGTGTCCCCAGTGGTGTC	0.006	38.1	100		ENSGALG00000002040	2		ENSGALG00000013129	2		ENSGALG00000015888	1		ENSGALG00000015364
Gga.10050.1.S1_at	ENSGALG00000020911	4	1	25	1564	1588	GGAGTTCTCCATTGGCATCAGGTCA	1e-05	47.3	100		ENSGALG00000012536	2		ENSGALG00000011387	1		ENSGALG00000027634	1		ENSGALG00000021542
Gga.10051.1.S1_at	ENSGALG00000017008	11	1	25	1349	1373	GCATGTGTGTTTGGTACATCAGCCA	1e-05	47.3	100		ENSGALG00000007046	2		ENSGALG00000007131	1		ENSGALG00000013502	1		ENSGALG00000020419
Gga.10052.1.S1_at	ENSGALG00000009254	11	1	25	7607	7631	TTGGCCTTTCTATTACTATTGTCTG	1e-05	47.3	100		ENSGALG00000002649	2		ENSGALG00000011449	2		ENSGALG00000009035	1		ENSGALG00000023580
Gga.10053.1.S1_at	ENSGALG00000001619	11	1	25	13755	13779	TAGCTCTTGGAATCTTACTTTGAAA	1e-05	47.3	100		ENSGALG00000007871	1		ENSGALG00000000449	1		ENSGALG00000009332	1		ENSGALG00000005955
Gga.10054.1.A1_at	ENSGALG00000012216	1	5	25	20552	20532	CTCCACTGAGCTGTTCCTAAG	0.081	34.4	95.24		ENSGALG00000006891	2		ENSGALG00000002836	5		ENSGALG00000008707	1		ENSGALG00000016356
Gga.10054.1.S1_at	ENSGALG00000011809	1	7	23	32574	32558	TCCCTTCTCTTCATCTG	0.29	32.5	100		ENSGALG00000014226	1		ENSGALG00000016197	3		ENSGALG00000013138	1		ENSGALG00000007625
Gga.10055.1.S1_at	ENSGALG00000016186	11	1	25	14557	14581	TGGGCAGCTTTCAGGTAAATAATCC	1e-05	47.3	100		ENSGALG00000027634	1		ENSGALG00000005610	1		ENSGALG00000001848	1		ENSGALG00000024340
Gga.10058.1.A1_at	ENSGALG00000017381	1	2	19	3705	3722	CATCTTTTGTAGCACTTT	0.081	34.4	100		ENSGALG00000015888	1		ENSGALG00000002239	2		ENSGALG00000000503	1		ENSGALG00000027704
Gga.10058.1.S1_at	ENSGALG00000005575	1	2	19	5851	5868	GACAGGCTTTGTTCAGGA	0.081	34.4	100		ENSGALG00000008347	2		ENSGALG00000015017	1		ENSGALG00000009821	1		ENSGALG00000015336
Gga.1006.1.S2_at	ENSGALG00000008883	1	1	21	141888	141908	TTTTTTCTCCAGTACATTCTC	0.002	39.9	100		ENSGALG00000013890	3		ENSGALG00000005308	1		ENSGALG00000003880	1		ENSGALG00000010963
Gga.10063.1.S1_at	ENSGALG00000003731	11	1	25	23853	23877	AAAAAGCAACCAACATCCTGACCTG	1e-05	47.3	100		ENSGALG00000004279	1		ENSGALG00000005966	1		ENSGALG00000020869	1		ENSGALG00000000486
Gga.10064.1.S1_at	ENSGALG00000019976	11	1	25	7422	7446	GATGATCTCAGTTCACTGTTGGGTT	1e-05	47.3	100		ENSGALG00000009332	4		ENSGALG00000000507	1		ENSGALG00000017249	1		ENSGALG00000027504
Gga.10066.1.S1_at	ENSGALG00000013641	8	1	25	29191	29167	GCCACTGTCTTCACTAGGCAAACAG	1e-05	47.3	100		ENSGALG00000010336	1		ENSGALG00000002981	3		ENSGALG00000002538	1		ENSGALG00000009604
Gga.10067.1.S1_at	ENSGALG00000010953	11	1	25	5691	5715	GCACATATGTAATTCCCAGCTGTAT	1e-05	47.3	100		ENSGALG00000003880	1		ENSGALG00000010365	5		ENSGALG00000012222	1		ENSGALG00000023068
Gga.10069.1.A1_at	ENSGALG00000012654	1	4	25	6486	6507	GTGGCACATCATGTTACACCAT	0.023	36.2	95.45		ENSGALG00000001848	1		ENSGALG00000004446	2		ENSGALG00000016406	1		ENSGALG00000026412
Gga.10069.1.S1_at	ENSGALG00000004021	1	1	19	12700	12718	TTCCAACTCCTTTCTGTTT	0.023	36.2	100		ENSGALG00000020869	1		ENSGALG00000027887	1		ENSGALG00000004610	1		ENSGALG00000028894
Gga.10071.1.S1_at	ENSGALG00000014236	1	3	25	59715	59692	AGTCACCTTCTGCAGAAG-TTCCT	0.006	38.1	95.83		ENSGALG00000009821	2		ENSGALG00000003540	3		ENSGALG00000027772	1		ENSGALG00000002486
Gga.10072.1.S1_at	ENSGALG00000007487	3	1	25	8433	8457	AAATCTACCACATGCCTGTAGTCTG	1e-05	47.3	100		ENSGALG00000011648	2		ENSGALG00000017075	2		ENSGALG00000011994	1		ENSGALG00000028469
Gga.10073.1.A1_at	ENSGALG00000007793	1	2	23	19000	19021	CAGCTCTGAGCCTGGTGACCAG	0.023	36.2	95.45		ENSGALG00000004812	4		ENSGALG00000012415	1		ENSGALG00000004973	1		ENSGALG00000027193
Gga.10073.1.S1_at	ENSGALG00000012732	1	5	22	107700	107717	CTGTCAGTGAAGTCCCTT	0.081	34.4	100		ENSGALG00000012222	1		ENSGALG00000016843	1		ENSGALG00000006498	1		ENSGALG00000013378
Gga.10075.1.S1_at	ENSGALG00000028032	2	1	25	71	47	AGTCGCCCATCCTGAAGGTGGAGCT	1e-05	47.3	100		ENSGALG00000012921	1		ENSGALG00000009279	2		ENSGALG00000020488	1		ENSGALG00000023453
Gga.10076.1.A1_at	ENSGALG00000022789	1	3	22	53813	53832	TTGCTTTGTCTTTCTTTCAA	0.006	38.1	100		ENSGALG00000001737	1		ENSGALG00000008291	1		ENSGALG00000014233	1		ENSGALG00000027312
Gga.10076.1.S1_at	ENSGALG00000023443	1	1	18	47841	47824	ATGTGCACTCTAACCATT	0.081	34.4	100		ENSGALG00000016406	1		ENSGALG00000027017	1		ENSGALG00000004165	1		ENSGALG00000012906
Gga.10077.1.S1_at	ENSGALG00000016477	11	1	25	5643	5667	GTAAGTTCATGCTCATTGTCATAGA	1e-05	47.3	100		ENSGALG00000027772	1		ENSGALG00000028475	3		ENSGALG00000008043	1		ENSGALG00000016341
Gga.10078.2.S1_x_at	ENSGALG00000001192	10	1	25	37750	37774	AAGGAACTTGTCTACCTTGTCCAGA	1e-05	47.3	100		ENSGALG00000006498	1		ENSGALG00000009863	1		ENSGALG00000008970	1		ENSGALG00000007997
Gga.10079.1.S1_at	ENSGALG00000002445	11	1	25	15983	16007	TACTGTCCTCAAATGTCTCAAGCTT	1e-05	47.3	100		ENSGALG00000014233	2		ENSGALG00000002155	8		ENSGALG00000023546	1		ENSGALG00000011718
Gga.1008.1.S1_at	ENSGALG00000027036	1	4	21	33495	33512	TGTTCCCTGCTGTGATTG	0.081	34.4	100		ENSGALG00000020488	1		ENSGALG00000008058	1		ENSGALG00000010982	1		ENSGALG00000029169
Gga.10080.1.S1_at	ENSGALG00000010995	11	1	25	10777	10801	GAACTGATTCTTTTCTGTGCCAGCA	1e-05	47.3	100		ENSGALG00000016049	1		ENSGALG00000006143	1		ENSGALG00000007470	1		ENSGALG00000026756
Gga.10082.1.S1_at	ENSGALG00000000707	11	1	25	3604	3580	AGTTAGGACCAAACATTCAGCTCTA	1e-05	47.3	100		ENSGALG00000004165	3		ENSGALG00000016254	1		ENSGALG00000004372	1		ENSGALG00000001856
Gga.10084.1.A1_at	ENSGALG00000012572	1	6	24	1228	1210	TCCCATGGTTCTGATTGCA	0.023	36.2	100		ENSGALG00000002522	2		ENSGALG00000002272	1		ENSGALG00000005369	1		ENSGALG00000023030
Gga.10087.1.S1_at	ENSGALG00000009145	1	5	23	5869	5851	ACATTCATCAACTTTAGCA	0.023	36.2	100		ENSGALG00000008043	1		ENSGALG00000002511	1		ENSGALG00000027991	1		ENSGALG00000026152
Gga.10088.1.A1_at	ENSGALG00000013095	1	2	19	12294	12311	TTGTTTTATTCCTCATCA	0.081	34.4	100		ENSGALG00000000166	1		ENSGALG00000002040	2		ENSGALG00000010827	1		ENSGALG00000028133
Gga.10088.1.S1_at	ENSGALG00000003148	1	2	25	275392	275417	ATAGACTACTCTGG-CTTT-TCCTCA	0.023	36.2	92.31		ENSGALG00000001101	1		ENSGALG00000012536	2		ENSGALG00000010117	1		ENSGALG00000023526
Gga.10089.1.S1_at	ENSGALG00000028251	1	2	19	40	23	GAGGGCCGGCAGCTGCCA	0.081	34.4	100		ENSGALG00000008970	3		ENSGALG00000002649	2		ENSGALG00000021232	1		ENSGALG00000026259
Gga.10089.1.S1_s_at	ENSGALG00000012273	3	1	25	7	31	GTTCAGAAGACGTTTCCTCATCCCA	1e-05	47.3	100		ENSGALG00000023546	1		ENSGALG00000010569	1		ENSGALG00000012953	1		ENSGALG00000028455
Gga.10091.1.S1_at	ENSGALG00000009895	1	3	24	58812	58832	TGTGAAAGCTTCCAGCCTGCAA	0.081	34.4	95.45		ENSGALG00000016934	1		ENSGALG00000012856	1		ENSGALG00000006811	1		ENSGALG00000003475
Gga.10093.1.S1_at	ENSGALG00000016355	1	7	25	56174	56192	TGTACGTTGCTTTGCATTT	0.023	36.2	100		ENSGALG00000013754	1		ENSGALG00000014226	1		ENSGALG00000010400	1		ENSGALG00000015454
Gga.10094.1.S1_at	ENSGALG00000009131	11	1	25	97861	97885	GGGTACTTGGTAAGAAGCTTTCAGA	1e-05	47.3	100		ENSGALG00000005369	1		ENSGALG00000020084	2		ENSGALG00000001741	1		ENSGALG00000024379
Gga.10096.1.S1_at	ENSGALG00000003854	1	3	24	10474	10453	AATCTTCTACTTTCTAACAACA	0.023	36.2	95.45		ENSGALG00000009123	1		ENSGALG00000027634	1		ENSGALG00000003640	1		ENSGALG00000025897
Gga.10097.2.A1_at	ENSGALG00000014155	1	1	18	18318	18335	GCAGCTTGCATTTGGCAG	0.081	34.4	100		ENSGALG00000010827	3		ENSGALG00000008347	1		ENSGALG00000007879	1		ENSGALG00000018733
Gga.10097.2.S1_a_at	ENSGALG00000025738	1	1	18	4777	4794	CTGGAATCTGCAGCTGAA	0.081	34.4	100		ENSGALG00000003441	3		ENSGALG00000015888	1		ENSGALG00000011069	1		ENSGALG00000026518
Gga.10099.1.A1_at	ENSGALG00000014783	1	6	22	95674	95658	CTCTGAAAGCCCTGCAC	0.29	32.5	100		ENSGALG00000021232	1		ENSGALG00000013502	1		ENSGALG00000015377	1		ENSGALG00000028028
Gga.10099.1.S1_at	ENSGALG00000029138	1	1	21	4771	4751	GAAGGAGCCCTTGGAGATGTC	0.081	34.4	95.24		ENSGALG00000012953	2		ENSGALG00000009035	1		ENSGALG00000004205	1		ENSGALG00000011509
Gga.101.1.S1_at	ENSGALG00000009066	4	1	25	263239	263263	AAACTGTGAGCAGCCTTACGTCACT	1e-05	47.3	100		ENSGALG00000010400	1		ENSGALG00000009332	1		ENSGALG00000000410	1		ENSGALG00000018772
Gga.1010.1.S1_at	ENSGALG00000000869	11	1	25	9252	9276	ATAGCGTTGTGCATGTTAGCGCCAG	1e-05	47.3	100		ENSGALG00000003640	1		ENSGALG00000015118	1		ENSGALG00000010311	1		ENSGALG00000011953
Gga.10100.1.S1_at	ENSGALG00000009559	11	1	25	37780	37804	AAGACACATGTTGACACCGTCCTGG	1e-05	47.3	100		ENSGALG00000006617	1		ENSGALG00000008707	1		ENSGALG00000003053	1		ENSGALG00000011868
Gga.10103.1.S1_at	ENSGALG00000013102	9	1	25	10382	10406	GTTCCTCCATCAAAAACTCAGTCTG	1e-05	47.3	100		ENSGALG00000011069	1		ENSGALG00000009485	1		ENSGALG00000015110	1		ENSGALG00000027170
Gga.10105.1.S1_at	ENSGALG00000008457	11	1	25	32709	32733	TTGCTTTTGTTATTCCTGGTGGTTA	1e-05	47.3	100		ENSGALG00000004205	2		ENSGALG00000013138	4		ENSGALG00000012012	1		ENSGALG00000026461
Gga.10106.1.S1_at	ENSGALG00000016579	1	8	24	5583	5599	ATTTGCTGCAGCTGCTT	0.29	32.5	100		ENSGALG00000010311	4		ENSGALG00000027912	2		ENSGALG00000016750	1		ENSGALG00000018241
Gga.10107.1.A1_at	ENSGALG00000001256	11	1	25	7345	7321	GTAAATTCAACTGCCGGAACTCAAA	1e-05	47.3	100		ENSGALG00000006511	2		ENSGALG00000003880	2		ENSGALG00000009291	1		ENSGALG00000002260
Gga.10109.1.S1_at	ENSGALG00000013124	1	6	24	264939	264957	GTGATGACTCTTCTTCTGA	0.023	36.2	100		ENSGALG00000015110	2		ENSGALG00000006219	8		ENSGALG00000004003	1		ENSGALG00000023609
Gga.1011.1.S1_at	ENSGALG00000008512	1	4	22	5879	5897	CCTTGCATCTGTGTGCTCT	0.023	36.2	100		ENSGALG00000006053	4		ENSGALG00000020869	1		ENSGALG00000002414	1		ENSGALG00000011568
Gga.10110.1.S1_at	ENSGALG00000009855	1	7	24	109	92	GGTGACATCAGCGGCGCC	0.081	34.4	100		ENSGALG00000011175	1		ENSGALG00000000503	1		ENSGALG00000015967	1		ENSGALG00000028998
Gga.10112.1.S1_at	ENSGALG00000008947	1	5	25	399	419	AAACTCCATGCCTGATATGAA	0.002	39.9	100		ENSGALG00000011093	1		ENSGALG00000001848	1		ENSGALG00000012154	1		ENSGALG00000026095
Gga.10114.2.S1_at	ENSGALG00000008321	11	1	25	7656	7680	AACTGGAGCCAGGTATTTCTTTTGG	1e-05	47.3	100		ENSGALG00000012012	1		ENSGALG00000009821	1		ENSGALG00000008621	1		ENSGALG00000022800
Gga.10116.1.A1_at	ENSGALG00000010199	11	1	25	3918	3894	GAAACTCGCATCTGCTGTAGGATCA	1e-05	47.3	100		ENSGALG00000008628	2		ENSGALG00000017249	1		ENSGALG00000002397	1		ENSGALG00000014190
Gga.10116.1.S1_at	ENSGALG00000010199	11	1	25	3760	3784	GTAATACTGCATATACACTCAGAAT	1e-05	47.3	100		ENSGALG00000014303	2		ENSGALG00000002538	1		ENSGALG00000008539	1		ENSGALG00000023784
Gga.10117.2.S1_a_at	ENSGALG00000009312	10	1	25	1476	1500	TCACTTGTCTGATACAGGTGTGCCA	1e-05	47.3	100		ENSGALG00000000357	5		ENSGALG00000012222	2		ENSGALG00000022206	1		ENSGALG00000012448
Gga.10118.1.S1_at	ENSGALG00000001533	11	1	25	1917	1893	CACACTATGGAGCAGGCGTTCCTGA	1e-05	47.3	100		ENSGALG00000004003	2		ENSGALG00000002988	1		ENSGALG00000027377	1		ENSGALG00000005332
Gga.10121.1.S1_at	ENSGALG00000015497	1	2	23	7906	7885	AAAGCAGCCGCAGATGGATCTT	0.023	36.2	95.45		ENSGALG00000015967	1		ENSGALG00000016406	2		ENSGALG00000016475	1		ENSGALG00000026974
Gga.10122.1.S1_at	ENSGALG00000012602	1	1	19	7805	7823	AGGTCACTGGCTGCTCTCA	0.023	36.2	100		ENSGALG00000010268	1		ENSGALG00000027772	1		ENSGALG00000017396	1		ENSGALG00000016685
Gga.10123.1.S1_a_at	ENSGALG00000012523	8	1	25	5099	5123	AAGGCTATATCAGTTCCAGAGACAA	1e-05	47.3	100		ENSGALG00000021399	2		ENSGALG00000011994	3		ENSGALG00000003473	1		ENSGALG00000026533
Gga.10124.1.S1_at	ENSGALG00000001677	11	1	25	34143	34167	AAAGACACTTCCTTGCTGGATAAAT	1e-05	47.3	100		ENSGALG00000012154	2		ENSGALG00000004610	1		ENSGALG00000005243	1		ENSGALG00000026678
Gga.10126.1.A1_at	ENSGALG00000012468	11	1	25	15152	15128	AATCAGAACTTGTCAGCCTGTTGCA	1e-05	47.3	100		ENSGALG00000008621	1		ENSGALG00000006463	2		ENSGALG00000010707	1		ENSGALG00000028756
Gga.10126.1.S1_at	ENSGALG00000012468	11	1	25	14985	15009	TTCTGATCCTTCTGTGCACCAAATC	1e-05	47.3	100		ENSGALG00000025756	1		ENSGALG00000004973	3		ENSGALG00000001789	1		ENSGALG00000009868
Gga.10128.1.S1_at	ENSGALG00000015244	11	1	25	8030	8054	AGGTAGGCAGATGCCACGCTGTGCT	1e-05	47.3	100		ENSGALG00000008539	3		ENSGALG00000008136	1		ENSGALG00000003803	1		ENSGALG00000001883
Gga.10134.1.S1_at	ENSGALG00000012954	1	1	19	76535	76517	CAGCAGGAATCAGCTACGA	0.023	36.2	100		ENSGALG00000022206	3		ENSGALG00000006498	10		ENSGALG00000017283	1		ENSGALG00000023378
Gga.10135.1.S1_at	ENSGALG00000026661	11	1	25	28261	28285	ACGCACCAAACACTGAGTCTTCATT	1e-05	47.3	100		ENSGALG00000002693	1		ENSGALG00000020488	1		ENSGALG00000015653	1		ENSGALG00000021002
Gga.10136.1.A1_at	ENSGALG00000004044	11	1	25	7259	7235	AAGCAGAGGACCTACACTCTTCACT	1e-05	47.3	100		ENSGALG00000016546	1		ENSGALG00000014233	2		ENSGALG00000007952	1		ENSGALG00000026786
Gga.10138.1.S1_at	ENSGALG00000002948	1	1	25	7601	7625	AACTCCAGTCCAAGCGACAAATATG	0.0005	41.7	96		ENSGALG00000005348	1		ENSGALG00000004165	3		ENSGALG00000027242	1		ENSGALG00000001480
Gga.10138.2.S1_a_at	ENSGALG00000014234	1	5	23	68066	68084	TCTTCAGGCAATGTTTTTG	0.023	36.2	100		ENSGALG00000010707	1		ENSGALG00000008043	1		ENSGALG00000001359	1		ENSGALG00000029151
Gga.10138.3.A1_at	ENSGALG00000002948	7	1	25	4940	4916	TCAAATCCATGCTCATCACTTTCAT	1e-05	47.3	100		ENSGALG00000001789	2		ENSGALG00000029049	1		ENSGALG00000005714	1		ENSGALG00000004223
Gga.10138.3.S1_at	ENSGALG00000002764	1	1	20	16030	16049	GTGTTTACTGAGTCTTTAAA	0.006	38.1	100		ENSGALG00000017283	2		ENSGALG00000008970	2		ENSGALG00000004724	1		ENSGALG00000014648
Gga.10142.1.S1_at	ENSGALG00000026710	11	1	25	1087	1111	AAACACGGAGGCTTCTGATTCACAC	1e-05	47.3	100		ENSGALG00000015653	2		ENSGALG00000023546	1		ENSGALG00000011747	1		ENSGALG00000028445
Gga.10144.1.A1_at	ENSGALG00000011826	11	1	25	36408	36384	ACCATTGATGGCTGTGGCGGTGAAT	1e-05	47.3	100		ENSGALG00000003803	2		ENSGALG00000010982	1		ENSGALG00000006788	1		ENSGALG00000027125
Gga.10144.1.S1_at	ENSGALG00000011826	11	1	25	36115	36139	GAAGGTGGATGTGCTGCTTTCACCC	1e-05	47.3	100		ENSGALG00000011747	1		ENSGALG00000007470	1		ENSGALG00000007519	1		ENSGALG00000008216
Gga.10150.1.S1_s_at	ENSGALG00000014848	9	1	25	29616	29640	GAGATATGAAAAACGAACAACGCCA	1e-05	47.3	100		ENSGALG00000000811	1		ENSGALG00000005369	1		ENSGALG00000008156	1		ENSGALG00000028861
Gga.10152.1.S1_at	ENSGALG00000006201	1	4	25	87	65	CAGGTCATCTGTGTTCACA-TCA	0.023	36.2	95.65		ENSGALG00000012550	1		ENSGALG00000004372	4		ENSGALG00000011834	1		ENSGALG00000004703
Gga.10153.1.S1_at	ENSGALG00000001677	1	5	23	9325	9343	GTGTCACCAGTGATCCTGC	0.023	36.2	100		ENSGALG00000008156	4		ENSGALG00000027991	2		ENSGALG00000000701	1		ENSGALG00000003034
Gga.10154.1.S1_at	ENSGALG00000010225	11	1	25	3824	3848	AACGAATCCTATATGCACGGTGCTC	1e-05	47.3	100		ENSGALG00000014631	1		ENSGALG00000010827	3		ENSGALG00000004001	1		ENSGALG00000011498
Gga.10156.2.S1_at	ENSGALG00000011739	11	1	25	2755	2779	CACGGAGCGCACTGTGACTTGGATA	1e-05	47.3	100		ENSGALG00000014841	1		ENSGALG00000010117	4		ENSGALG00000004106	1		ENSGALG00000005797
Gga.10157.2.S1_at	ENSGALG00000015409	8	1	25	30444	30468	ATGGAGTAACCATTCAATTCTTAAT	1e-05	47.3	100		ENSGALG00000004001	3		ENSGALG00000006811	1		ENSGALG00000007069	1		ENSGALG00000001429
Gga.10158.1.S1_at	ENSGALG00000012362	1	9	25	12272	12256	CCCAGAAGACCTAGAAA	0.29	32.5	100		ENSGALG00000007069	4		ENSGALG00000021232	1		ENSGALG00000006292	1		ENSGALG00000010551
Gga.10159.2.S1_a_at	ENSGALG00000002157	11	1	25	806	830	TGCCTGGGCTTGGTGCGATTCCTCA	1e-05	47.3	100		ENSGALG00000006292	2		ENSGALG00000012953	2		ENSGALG00000012705	1		ENSGALG00000011228
Gga.10160.1.S1_at	ENSGALG00000007667	1	7	24	8862	8879	TCTACTTCAGCATGTGAT	0.081	34.4	100		ENSGALG00000012705	1		ENSGALG00000010400	3		ENSGALG00000012211	1		ENSGALG00000006693
Gga.10161.1.S1_at	ENSGALG00000014559	1	2	22	19643	19623	CACCTTTTAATGGGCTACGGC	0.081	34.4	95.24		ENSGALG00000006008	1		ENSGALG00000001741	2		ENSGALG00000009932	1		ENSGALG00000007698
Gga.10162.1.A1_at	ENSGALG00000006805	1	3	23	8188	8208	TTCTTCGGTAGTTTTGGCTTG	0.081	34.4	95.24		ENSGALG00000020454	1		ENSGALG00000003640	2		ENSGALG00000006341	1		ENSGALG00000008280
Gga.10162.1.S1_at	ENSGALG00000007685	1	5	22	8652	8669	GCTGCTGCTCAGAACCTG	0.081	34.4	100		ENSGALG00000000511	2		ENSGALG00000007879	1		ENSGALG00000011574	1		ENSGALG00000001191
Gga.10164.1.S1_at	ENSGALG00000014755	11	1	25	1185	1209	ATTTCCCGGTGCATTGCCTAGATTC	1e-05	47.3	100		ENSGALG00000024490	1		ENSGALG00000011069	1		ENSGALG00000011609	1		ENSGALG00000028328
Gga.10165.1.S1_at	ENSGALG00000011211	10	1	25	494	518	GTACTTGTCAGCCTTCTGTAGCTGA	1e-05	47.3	100		ENSGALG00000009932	3		ENSGALG00000015377	1		ENSGALG00000017644	1		ENSGALG00000007628
Gga.10166.1.S1_at	ENSGALG00000004181	1	2	24	4660	4638	ACCCGTCCATGTATTCAATGTCG	0.006	38.1	95.65		ENSGALG00000003590	1		ENSGALG00000004205	1		ENSGALG00000000242	1		ENSGALG00000007793
Gga.10169.1.S1_s_at	ENSGALG00000009596	1	5	24	82888	82869	GGTCAACATCAGTCAACGTG	0.006	38.1	100		ENSGALG00000010087	3		ENSGALG00000000410	1		ENSGALG00000005771	1		ENSGALG00000021812
Gga.10170.1.S1_at	ENSGALG00000002877	1	1	18	7879	7896	GATTCTTATCCTCATTTT	0.081	34.4	100		ENSGALG00000005072	4		ENSGALG00000003053	1		ENSGALG00000011990	1		ENSGALG00000015615
Gga.10171.1.A1_at	ENSGALG00000009676	11	1	25	1109	1085	TGTTTTCACTGTCTGCAATCCTCGT	1e-05	47.3	100		ENSGALG00000011609	4		ENSGALG00000010311	4		ENSGALG00000011439	1		ENSGALG00000021726
Gga.10171.1.S1_at	ENSGALG00000009676	9	1	25	1986	2010	GTCAGTCAGATGCAATTAGGAACAA	1e-05	47.3	100		ENSGALG00000011574	1		ENSGALG00000015110	2		ENSGALG00000011415	1		ENSGALG00000004167
Gga.10172.2.S1_at	ENSGALG00000013112	10	1	25	7003	7027	GAGCTGACAATATTCTCATCACCGT	1e-05	47.3	100		ENSGALG00000002670	1		ENSGALG00000016750	1		ENSGALG00000005770	1		ENSGALG00000028601
Gga.10175.1.S1_at	ENSGALG00000009066	1	3	21	79122	79140	GTGATCTAGAAACTTTATG	0.023	36.2	100		ENSGALG00000014426	2		ENSGALG00000012012	4		ENSGALG00000006688	1		ENSGALG00000014085
Gga.10177.1.S1_at	ENSGALG00000006368	10	1	25	61517	61541	GTTCCAGAGCTGTAAACAGATGCCA	1e-05	47.3	100		ENSGALG00000010096	1		ENSGALG00000009291	1		ENSGALG00000006912	1		ENSGALG00000029016
Gga.10178.1.S1_at	ENSGALG00000014295	11	1	25	6632	6656	TAAGAAGGGCCGAGTCAGGCTCCTC	1e-05	47.3	100		ENSGALG00000010986	1		ENSGALG00000002414	3		ENSGALG00000012607	1		ENSGALG00000025807
Gga.10180.1.S1_a_at	ENSGALG00000021541	10	1	25	53360	53336	ATGGCAGGCAGGTATGTGCACCTCA	1e-05	47.3	100		ENSGALG00000017644	1		ENSGALG00000009993	1		ENSGALG00000014910	1		ENSGALG00000020523
Gga.10180.2.A1_at	ENSGALG00000021541	11	1	25	54828	54852	GGTAGAGAGCCCGTGGTCATCTCAG	1e-05	47.3	100		ENSGALG00000017159	3		ENSGALG00000004003	2		ENSGALG00000004353	1		ENSGALG00000014950
Gga.10181.1.S1_at	ENSGALG00000015143	11	1	25	5122	5146	GTAAGTATTTGAGAACACACCTAAT	1e-05	47.3	100		ENSGALG00000011990	1		ENSGALG00000015967	1		ENSGALG00000017331	1		ENSGALG00000014509
Gga.10182.1.S1_at	ENSGALG00000010550	6	1	25	282	306	GCAGGTGAAACACACAGTGAGATCT	1e-05	47.3	100		ENSGALG00000011439	2		ENSGALG00000005272	3		ENSGALG00000025972	1		ENSGALG00000027563
Gga.10183.1.S1_s_at	ENSGALG00000012969	11	1	25	1633	1657	TGGGCAGCCCATGGTAGTGCCTCAC	1e-05	47.3	100		ENSGALG00000006010	1		ENSGALG00000012154	1		ENSGALG00000026367	1		ENSGALG00000001327
Gga.10184.1.S1_at	ENSGALG00000007382	11	1	25	3175	3199	ACCTCCTCTGCTCTGGGCTGAACAA	1e-05	47.3	100		ENSGALG00000007806	1		ENSGALG00000008621	1		ENSGALG00000002018	1		ENSGALG00000015754
Gga.10185.1.S1_at	ENSGALG00000008038	11	1	25	6390	6414	GTTGCAGCCTGCATGAATTCTTAGG	1e-05	47.3	100		ENSGALG00000005770	2		ENSGALG00000002397	2		ENSGALG00000008544	1		ENSGALG00000024507
Gga.10187.1.S1_at	ENSGALG00000015333	11	1	25	5014	5038	GAACATGCGTTCTTCTGCACTTGTA	1e-05	47.3	100		ENSGALG00000004554	1		ENSGALG00000008539	1		ENSGALG00000028249	1		ENSGALG00000027051
Gga.10189.1.S1_at	ENSGALG00000012246	1	4	25	57048	57068	AGAGACAACCAGCTGAGAACTT	0.081	34.4	95.45		ENSGALG00000006688	1		ENSGALG00000022206	1		ENSGALG00000000498	1		ENSGALG00000011914
Gga.1019.1.S1_at	ENSGALG00000000353	1	7	25	4604	4622	CAGTTTCCTCTGTAAATTC	0.023	36.2	100		ENSGALG00000024097	1		ENSGALG00000027377	3		ENSGALG00000026069	1		ENSGALG00000027592
Gga.10190.1.S1_at	ENSGALG00000002762	11	1	25	10564	10588	ATAGTAGAGAGAAAGCCAGTGTGCA	1e-05	47.3	100		ENSGALG00000005895	1		ENSGALG00000016475	1		ENSGALG00000016631	1		ENSGALG00000026626
Gga.10191.1.S1_at	ENSGALG00000016949	11	1	25	6077	6101	AGCTTTGTGGCTTGCAGACTGTCCT	1e-05	47.3	100		ENSGALG00000014674	2		ENSGALG00000017396	4		ENSGALG00000014581	1		ENSGALG00000020768
Gga.10192.1.S1_at	ENSGALG00000007909	11	1	25	1216	1240	GGTGCTTCTGAGAACCAGCTGGTTT	1e-05	47.3	100		ENSGALG00000015736	2		ENSGALG00000005243	2		ENSGALG00000025937	1		ENSGALG00000006110
Gga.10193.1.S1_at	ENSGALG00000005656	1	4	23	6584	6565	CTTTTCCTCACACATACAAG	0.006	38.1	100		ENSGALG00000004660	1		ENSGALG00000003473	2		ENSGALG00000014964	1		ENSGALG00000026276
Gga.10195.1.S1_at	ENSGALG00000001693	2	1	25	120	96	AACAGTCAGCAGCATATTGTCCAGC	1e-05	47.3	100		ENSGALG00000000420	1		ENSGALG00000010707	1		ENSGALG00000002390	1		ENSGALG00000020329
Gga.10196.1.S1_at	ENSGALG00000000868	11	1	25	2837	2813	AAAGGCACAGCCCACAGCGAGATGC	1e-05	47.3	100		ENSGALG00000012607	3		ENSGALG00000003803	1		ENSGALG00000010486	1		ENSGALG00000022738
Gga.10197.1.A1_at	ENSGALG00000013572	1	7	25	8574	8592	CTCCTTTCAGCCCGAATTT	0.023	36.2	100		ENSGALG00000008153	1		ENSGALG00000001789	1		ENSGALG00000013200	1		ENSGALG00000027217
Gga.10200.1.S1_at	ENSGALG00000004555	11	1	25	1732	1756	AGTTAAGATTTGCTCACGTTCATGA	1e-05	47.3	100		ENSGALG00000002646	3		ENSGALG00000015653	1		ENSGALG00000026159	1		ENSGALG00000003572
Gga.10201.1.S1_at	ENSGALG00000020253	8	1	25	6832	6856	AGAGTTTGAATGTTCCCTACCGTAT	1e-05	47.3	100		ENSGALG00000005911	1		ENSGALG00000017283	2		ENSGALG00000014786	1		ENSGALG00000023927
Gga.10202.1.A1_at	ENSGALG00000025740	1	3	24	3403	3382	GGTCTCCCGGCTCTGGAAGTGC	0.023	36.2	95.45		ENSGALG00000010178	1		ENSGALG00000007952	1		ENSGALG00000002955	1		ENSGALG00000012634
Gga.10202.1.S1_at	ENSGALG00000003135	1	2	19	171138	171121	GTCAGCACTTCCAGAGCC	0.081	34.4	100		ENSGALG00000017189	1		ENSGALG00000027242	1		ENSGALG00000026895	1		ENSGALG00000026225
Gga.10204.1.S1_s_at	ENSGALG00000001049	7	1	25	2652	2676	TGAACAACCTCAAACTGACCGAATT	1e-05	47.3	100		ENSGALG00000010661	1		ENSGALG00000001359	1		ENSGALG00000006680	1		ENSGALG00000003836
Gga.10205.1.S1_at	ENSGALG00000016867	1	1	24	54108	54132	ACTGGTG-AGATATTTACAACTGCA	0.081	34.4	92		ENSGALG00000008544	1		ENSGALG00000005714	1		ENSGALG00000010744	1		ENSGALG00000001442
Gga.10205.1.S1_s_at	ENSGALG00000008735	1	1	18	4323	4340	GTGATGTGCTGAGAAGCC	0.081	34.4	100		ENSGALG00000003933	1		ENSGALG00000004724	1		ENSGALG00000010235	1		ENSGALG00000027489
Gga.10206.1.S1_at	ENSGALG00000015035	11	1	25	2197	2173	GTATTCCAAGTGATTTCTGCAGCCT	1e-05	47.3	100		ENSGALG00000028249	5		ENSGALG00000011747	2		ENSGALG00000013776	1		ENSGALG00000010719
Gga.10207.2.S1_at	ENSGALG00000003016	10	1	25	3863	3887	ATAATTAAGCTTCTCCTCGCTTAGG	1e-05	47.3	100		ENSGALG00000000498	1		ENSGALG00000006788	3		ENSGALG00000003362	1		ENSGALG00000027194
Gga.10209.1.S1_at	ENSGALG00000012685	11	1	25	18189	18165	GCACCATCTACTTTCAGCTTCTGAA	1e-05	47.3	100		ENSGALG00000003238	1		ENSGALG00000008156	1		ENSGALG00000022802	1		ENSGALG00000027505
Gga.10211.1.S1_at	ENSGALG00000012739	1	2	19	53441	53458	TGCAAATGCAGCTTCTGG	0.081	34.4	100		ENSGALG00000008034	2		ENSGALG00000007519	2		ENSGALG00000005676	1		ENSGALG00000007768
Gga.10211.2.S1_a_at	ENSGALG00000014366	1	8	25	6503	6520	GCTTTAATTTCTTCTAGG	0.081	34.4	100		ENSGALG00000016631	3		ENSGALG00000011834	1		ENSGALG00000002863	1		ENSGALG00000028513
Gga.10213.1.S1_at	ENSGALG00000013101	33	1	25	38871	38847	TGACAACTTGTCATCCAATGGGAAA	1e-05	47.3	100		ENSGALG00000025937	2		ENSGALG00000004001	1		ENSGALG00000023843	1		ENSGALG00000027949
Gga.10215.1.S1_at	ENSGALG00000003052	1	3	25	23843	23821	GTTTTTCAGCTTCCTGTACTGCC	0.006	38.1	95.65		ENSGALG00000013778	2		ENSGALG00000000701	1		ENSGALG00000011618	1		ENSGALG00000027632
Gga.10216.2.A1_at	ENSGALG00000010789	5	1	25	253	229	TCAGGCTGGGCATGTTCACCTTCTG	1e-05	47.3	100		ENSGALG00000010486	3		ENSGALG00000004106	1		ENSGALG00000011703	1		ENSGALG00000009771
Gga.10218.2.A1_at	ENSGALG00000028523	10	1	25	1899	1875	AGCTCGATGAGCTCCATCTCGGTGG	1e-05	47.3	100		ENSGALG00000013200	4		ENSGALG00000007069	2		ENSGALG00000007623	1		ENSGALG00000002415
Gga.10219.1.A1_at	ENSGALG00000027402	11	1	25	935	911	GAGCAAAGAGCAATTCCCGGTCCTG	1e-05	47.3	100		ENSGALG00000026159	2		ENSGALG00000006292	1		ENSGALG00000010716	1		ENSGALG00000013033
Gga.10224.1.S1_at	ENSGALG00000028301	11	1	25	3036	3060	ATGCAGAGATGTGATTCCCTGTTTC	1e-05	47.3	100		ENSGALG00000002955	3		ENSGALG00000012705	2		ENSGALG00000004270	1		ENSGALG00000003740
Gga.10225.1.S1_at	ENSGALG00000009107	1	1	18	32206	32189	AACTCTTCAGTACTCTGA	0.081	34.4	100		ENSGALG00000006680	3		ENSGALG00000027540	4		ENSGALG00000009212	1		ENSGALG00000005057
Gga.10228.1.S1_at	ENSGALG00000008914	11	1	25	43787	43763	ACGGCATTCATTTCATTGGTTACCA	1e-05	47.3	100		ENSGALG00000010744	2		ENSGALG00000009932	5		ENSGALG00000020561	1		ENSGALG00000011880
Gga.10229.1.S1_at	ENSGALG00000013124	2	3	24	185468	185447	ACAACTTCTCTCAGCAGCCTGT	0.0005	41.7	100		ENSGALG00000015421	1		ENSGALG00000012211	3		ENSGALG00000026761	1		ENSGALG00000014502
Gga.10230.1.S1_at	ENSGALG00000000486	11	1	25	4136	4112	GCTCCCTCCAGGTAGATTGACTTAG	1e-05	47.3	100		ENSGALG00000010235	4		ENSGALG00000006341	2		ENSGALG00000009958	1		ENSGALG00000013834
Gga.10231.1.S1_at	ENSGALG00000012048	1	5	25	27287	27267	TCCTTTTCTGGACAGTGCAGT	0.081	34.4	95.24		ENSGALG00000026374	1		ENSGALG00000011574	1		ENSGALG00000028772	1		ENSGALG00000028630
Gga.10232.1.S1_at	ENSGALG00000021275	5	1	25	2596	2620	ACGCCCGGCGGAAGTACAAGATCTC	1e-05	47.3	100		ENSGALG00000002863	1		ENSGALG00000011609	5		ENSGALG00000013741	1		ENSGALG00000026010
Gga.10233.1.S1_at	ENSGALG00000011427	11	1	25	3586	3610	CAAAGTCTTTGTGATCTCCAGGGCT	1e-05	47.3	100		ENSGALG00000023843	1		ENSGALG00000017644	1		ENSGALG00000000312	1		ENSGALG00000006266
Gga.10235.1.A1_at	ENSGALG00000012754	11	1	25	39473	39449	AAGTCAGTGTAACTCCAGTCTTCAA	1e-05	47.3	100		ENSGALG00000011703	1		ENSGALG00000000242	4		ENSGALG00000010543	1		ENSGALG00000006328
Gga.1024.1.S1_at	ENSGALG00000002762	1	3	20	155	138	AGTTCCAGCACATTCTGC	0.081	34.4	100		ENSGALG00000007623	5		ENSGALG00000005771	1		ENSGALG00000008482	1		ENSGALG00000027459
Gga.10242.1.S1_at	ENSGALG00000002420	11	1	25	3658	3634	GATGTGCCTTCGGACGCCAACAATT	1e-05	47.3	100		ENSGALG00000011618	1		ENSGALG00000026142	1		ENSGALG00000007095	1		ENSGALG00000027537
Gga.10246.1.S1_at	ENSGALG00000000316	1	3	24	5446	5425	CTGCGGCCTTTGGCTCAGGAGC	0.023	36.2	95.45		ENSGALG00000010716	2		ENSGALG00000027853	2		ENSGALG00000015528	1		ENSGALG00000021444
Gga.10247.1.S1_at	ENSGALG00000006832	8	1	25	9603	9627	CCGGTGCCCAGAGCAGTGTGATGCT	1e-05	47.3	100		ENSGALG00000004270	2		ENSGALG00000011990	2		ENSGALG00000023364	1		ENSGALG00000011865
Gga.10248.1.S1_at	ENSGALG00000016776	11	1	25	29963	29987	AACCTGTAACTCTTTGAGGCTGGAA	1e-05	47.3	100		ENSGALG00000024485	1		ENSGALG00000011439	7		ENSGALG00000010892	1		ENSGALG00000027403
Gga.10249.1.S1_at	ENSGALG00000009103	14	1	25	45546	45570	AATTTATGTCCATCCTTGCAGGGTA	1e-05	47.3	100		ENSGALG00000008110	1		ENSGALG00000011415	1		ENSGALG00000002817	1		ENSGALG00000020402
Gga.1025.1.S1_at	ENSGALG00000013861	11	1	25	11966	11990	AAATACACATGCTGCTGTTCACACC	1e-05	47.3	100		ENSGALG00000028772	2		ENSGALG00000005770	1		ENSGALG00000016477	1		ENSGALG00000008631
Gga.10250.1.S1_a_at	ENSGALG00000023552	11	1	25	6542	6566	ACTGTGATTCTCCTGTGAGAGGTTG	1e-05	47.3	100		ENSGALG00000011598	2		ENSGALG00000006688	7		ENSGALG00000029153	1		ENSGALG00000028643
Gga.10250.2.S1_a_at	ENSGALG00000023552	10	1	25	6401	6425	GCTTTTGAAGTACACAGCCAAGTCA	1e-05	47.3	100		ENSGALG00000013741	2		ENSGALG00000006912	2		ENSGALG00000006034	1		ENSGALG00000026058
Gga.10251.1.A1_at	ENSGALG00000017018	11	1	25	29871	29847	ACTTTAAACAAGTCATCTGATGGTT	1e-05	47.3	100		ENSGALG00000007217	2		ENSGALG00000000891	1		ENSGALG00000008430	1		ENSGALG00000005724
Gga.10251.1.S1_at	ENSGALG00000017018	11	1	25	29594	29618	GGTGTAATCTCACTTCTTTCATTTC	1e-05	47.3	100		ENSGALG00000013922	1		ENSGALG00000012607	2		ENSGALG00000012033	1		ENSGALG00000016459
Gga.10252.1.S1_at	ENSGALG00000003747	11	1	25	17220	17244	TACTGAATGGAAAGCTTTGTTTTAA	1e-05	47.3	100		ENSGALG00000022026	2		ENSGALG00000014910	1		ENSGALG00000001051	1		ENSGALG00000005678
Gga.10253.1.S1_s_at	ENSGALG00000016092	5	1	25	22433	22457	TCATCCAGCTCCTACTGCAGAGGGA	1e-05	47.3	100		ENSGALG00000008482	4		ENSGALG00000007863	1		ENSGALG00000001334	1		ENSGALG00000000489
Gga.10254.1.S1_at	ENSGALG00000026846	10	1	25	1002	1026	GAGGCACTCGGTAAACTTTCTGTTT	1e-05	47.3	100		ENSGALG00000007095	4		ENSGALG00000004353	1		ENSGALG00000006208	1		ENSGALG00000008080
Gga.10255.1.S1_at	ENSGALG00000017020	10	1	25	15747	15771	AGCACTGTTCCTAATAATACTGCAG	1e-05	47.3	100		ENSGALG00000003975	2		ENSGALG00000026367	1		ENSGALG00000015155	1		ENSGALG00000028014
Gga.1026.1.S1_at	ENSGALG00000006771	11	1	25	2979	3003	TTAACCAGTTCTAAAGGAGTGCTAC	1e-05	47.3	100		ENSGALG00000023364	1		ENSGALG00000025972	1		ENSGALG00000024381	1		ENSGALG00000011229
Gga.10262.1.S1_at	ENSGALG00000007509	1	1	20	76303	76322	AGGTGCCAAGTCACAGACCA	0.006	38.1	100		ENSGALG00000010892	3		ENSGALG00000017331	5		ENSGALG00000006094	1		ENSGALG00000027204
Gga.10263.1.S1_at	ENSGALG00000005017	11	1	25	659	683	TATGACATACCTTCAGCACGCTTCT	1e-05	47.3	100		ENSGALG00000003503	1		ENSGALG00000002018	1		ENSGALG00000016263	1		ENSGALG00000021220
Gga.10264.1.S1_at	ENSGALG00000012122	1	2	21	71398	71417	GGTGGCTCTTTTTCCATGGA	0.006	38.1	100		ENSGALG00000029153	1		ENSGALG00000026830	1		ENSGALG00000013911	1		ENSGALG00000019921
Gga.10266.1.S1_at	ENSGALG00000011450	1	8	24	2122	2106	AGGGCTGCAGCTTGCCC	0.29	32.5	100		ENSGALG00000016962	1		ENSGALG00000008544	7		ENSGALG00000007940	1		ENSGALG00000028675
Gga.10269.1.A1_at	ENSGALG00000008741	11	1	25	2863	2839	TGACCACATCCTACAGAACAGCTGA	1e-05	47.3	100		ENSGALG00000006034	2		ENSGALG00000022896	1		ENSGALG00000019382	1		ENSGALG00000021253
Gga.10269.1.S1_at	ENSGALG00000008741	11	1	25	2780	2804	GTAGGTGAGGAGTTACAACTGCACA	1e-05	47.3	100		ENSGALG00000012033	2		ENSGALG00000028249	1		ENSGALG00000004394	1		ENSGALG00000010301
Gga.10270.1.S1_at	ENSGALG00000005257	11	1	25	1706	1730	GTAAAGATTCCTCTGTCTGTTTCTT	1e-05	47.3	100		ENSGALG00000005297	1		ENSGALG00000000498	1		ENSGALG00000014038	1		ENSGALG00000024020
Gga.10272.1.S1_s_at	ENSGALG00000012915	1	1	21	4340	4319	GACTGAAAATGGCAGATT-TGG	0.081	34.4	95.45		ENSGALG00000001334	1		ENSGALG00000026069	1		ENSGALG00000026051	1		ENSGALG00000011162
Gga.10273.1.S1_at	ENSGALG00000006921	11	1	25	3465	3489	GGAATTTAATATGCCTGGGTGTCTG	1e-05	47.3	100		ENSGALG00000006208	2		ENSGALG00000016165	1		ENSGALG00000005791	1		ENSGALG00000014966
Gga.10274.1.S1_at	ENSGALG00000016980	11	1	25	9674	9698	GCAGTGGGTTTTGAATTAATTAGTA	1e-05	47.3	100		ENSGALG00000015155	2		ENSGALG00000016631	1		ENSGALG00000011762	1		ENSGALG00000001426
Gga.10276.1.A1_at	ENSGALG00000017197	5	1	25	340228	340252	CTGTGGATGTCCCTATTCATTGCAG	1e-05	47.3	100		ENSGALG00000024381	1		ENSGALG00000014581	2		ENSGALG00000016807	1		ENSGALG00000015455
Gga.10276.1.S1_at	ENSGALG00000022788	3	1	23	12670	12692	AAGCCTGTCTAGGTCTTTCTGGA	0.0001	43.6	100		ENSGALG00000012287	1		ENSGALG00000025937	2		ENSGALG00000007653	1		ENSGALG00000006206
Gga.10277.1.A1_at	ENSGALG00000029120	11	1	25	466	442	GTATTCTGGCATGGTGTACACTCCT	1e-05	47.3	100		ENSGALG00000013911	3		ENSGALG00000011274	1		ENSGALG00000012303	1		ENSGALG00000024405
Gga.10279.1.S1_at	ENSGALG00000006647	11	1	25	5074	5098	AAGTGAGCAGCCCTGGTCTTGACAG	1e-05	47.3	100		ENSGALG00000012683	1		ENSGALG00000026011	2		ENSGALG00000008457	1		ENSGALG00000027804
Gga.10281.1.S1_at	ENSGALG00000008820	11	1	25	3371	3395	GGAGGAACTCCTTCTGAGTTTCTGA	1e-05	47.3	100		ENSGALG00000007940	1		ENSGALG00000014964	4		ENSGALG00000003605	1		ENSGALG00000023819
Gga.10282.2.S1_a_at	ENSGALG00000027484	4	1	25	1964	1988	AGCTCCCAGAGCATCTGCGGATTCG	1e-05	47.3	100		ENSGALG00000004394	4		ENSGALG00000002390	2		ENSGALG00000004363	1		ENSGALG00000004009
Gga.10283.1.S1_at	ENSGALG00000016775	10	1	25	4728	4752	GCAAACTAGCTTTCATGCCATAGGT	1e-05	47.3	100		ENSGALG00000005791	1		ENSGALG00000010486	2		ENSGALG00000028043	1		ENSGALG00000027870
Gga.10286.1.S1_at	ENSGALG00000003935	2	1	25	8200	8224	TTAAGCAGCTACTGGTCAGAGCAGC	1e-05	47.3	100		ENSGALG00000026051	3		ENSGALG00000013200	6		ENSGALG00000028531	1		ENSGALG00000027849
Gga.10288.1.A1_at	ENSGALG00000009004	11	1	25	207534	207510	TTCATGCTGTTTACCATCTCTGTGA	1e-05	47.3	100		ENSGALG00000016908	2		ENSGALG00000026159	1		ENSGALG00000009783	1		ENSGALG00000019484
Gga.10289.1.S1_at	ENSGALG00000001411	5	1	25	7	31	GCCTCAGGCTCGGTTTTGAGTGATT	1e-05	47.3	100		ENSGALG00000011762	4		ENSGALG00000014786	2		ENSGALG00000002703	1		ENSGALG00000009705
Gga.1029.3.S1_at	ENSGALG00000003522	11	1	25	1407	1431	GACGTCAATCATGTGGAGCTTTAAC	1e-05	47.3	100		ENSGALG00000016807	4		ENSGALG00000002955	1		ENSGALG00000009699	1		ENSGALG00000009118
Gga.10290.1.A1_at	ENSGALG00000019961	11	1	25	3416	3392	GTTACACTGTAACATCCCCTAAGGA	1e-05	47.3	100		ENSGALG00000002765	4		ENSGALG00000006680	2		ENSGALG00000010294	1		ENSGALG00000028420
Gga.10290.1.S1_at	ENSGALG00000019961	11	1	25	4293	4317	AAACTTCCAGAGTTAATGAACTGCA	1e-05	47.3	100		ENSGALG00000012303	3		ENSGALG00000026895	1		ENSGALG00000010372	1		ENSGALG00000026309
Gga.10295.1.S1_at	ENSGALG00000014274	11	1	25	191	215	ATCTTGGTGAGGATAAGCTAAGGCT	1e-05	47.3	100		ENSGALG00000005956	2		ENSGALG00000010744	1		ENSGALG00000018800	1		ENSGALG00000022191
Gga.10296.1.S1_a_at	ENSGALG00000002889	11	1	25	2164	2188	ATCTTCAGGTCTGTTGATCTCTTAA	1e-05	47.3	100		ENSGALG00000005733	1		ENSGALG00000010235	1		ENSGALG00000011565	1		ENSGALG00000015003
Gga.10297.2.A1_at	ENSGALG00000009264	11	1	25	25984	25960	TTCACAGCCTCAGTTCCATATTGTA	1e-05	47.3	100		ENSGALG00000028531	1		ENSGALG00000003362	1		ENSGALG00000000766	1		ENSGALG00000026401
Gga.10297.2.S1_a_at	ENSGALG00000009264	11	1	25	25773	25797	ATGTCCCCATCTGGTAAGTGCGGCC	1e-05	47.3	100		ENSGALG00000000639	2		ENSGALG00000013776	3		ENSGALG00000014523	1		ENSGALG00000020262
Gga.10299.1.S1_a_at	ENSGALG00000027620	6	1	25	26702	26726	ACTATGCAGCGCTGATATGGCAACA	1e-05	47.3	100		ENSGALG00000001117	1		ENSGALG00000022802	2		ENSGALG00000004144	1		ENSGALG00000025905
Gga.10302.1.A1_at	ENSGALG00000003701	1	3	21	55305	55323	GGCTTTCTTCTTAGTGCAG	0.023	36.2	100		ENSGALG00000027898	1		ENSGALG00000002507	1		ENSGALG00000012783	1		ENSGALG00000020067
Gga.10302.1.S1_at	ENSGALG00000006473	1	5	22	218845	218862	GTTGTATTTCTTCTGCAA	0.081	34.4	100		ENSGALG00000010294	1		ENSGALG00000002863	5		ENSGALG00000012938	1		ENSGALG00000000810
Gga.10306.1.S1_at	ENSGALG00000000107	10	1	25	6861	6885	GCAAAGACTTTAAATTGTGGTTGTA	1e-05	47.3	100		ENSGALG00000009699	1		ENSGALG00000005676	1		ENSGALG00000003488	1		ENSGALG00000000497
Gga.10307.1.S1_at	ENSGALG00000013689	11	1	25	7543	7567	AGACCACAAAAGCTACTGCAGATTT	1e-05	47.3	100		ENSGALG00000010193	1		ENSGALG00000023843	1		ENSGALG00000015929	1		ENSGALG00000005207
Gga.10308.1.A1_at	ENSGALG00000009558	11	1	25	13587	13563	ATTATTCTGCCCGACATATCTGGAT	1e-05	47.3	100		ENSGALG00000020391	1		ENSGALG00000011618	1		ENSGALG00000001604	1		ENSGALG00000014584
Gga.10308.1.S1_at	ENSGALG00000009558	11	1	25	13130	13154	ACTATGTTACTTATGTCTTCTCAGA	1e-05	47.3	100		ENSGALG00000018800	3		ENSGALG00000007623	3		ENSGALG00000007616	1		ENSGALG00000028379
Gga.10309.2.A1_at	ENSGALG00000000993	11	1	25	1321	1297	GGAGATCTGTGCACATTGCTCTGAC	1e-05	47.3	100		ENSGALG00000002797	1		ENSGALG00000011703	2		ENSGALG00000014575	1		ENSGALG00000028826
Gga.10311.1.S1_at	ENSGALG00000012783	1	2	23	55360	55381	GCTGGCTCTTCTGTGATATTTC	0.023	36.2	95.45		ENSGALG00000000766	2		ENSGALG00000010716	1		ENSGALG00000016389	1		ENSGALG00000009610
Gga.10312.1.S1_at	ENSGALG00000017235	11	1	25	794	818	GAGTCACCTGGACACTGAGTTTTGC	1e-05	47.3	100		ENSGALG00000010441	4		ENSGALG00000004270	2		ENSGALG00000016931	1		ENSGALG00000016909
Gga.10315.1.S1_at	ENSGALG00000025923	11	1	25	2271	2295	GCTTCAACCAGAAGGACGTCTCCAT	1e-05	47.3	100		ENSGALG00000014523	3		ENSGALG00000009212	2		ENSGALG00000012572	1		ENSGALG00000014847
Gga.10317.1.A1_at	ENSGALG00000010786	2	4	24	187491	187511	AACTCATTGACAGCAGCCCTG	0.002	39.9	100		ENSGALG00000014150	1		ENSGALG00000006965	1		ENSGALG00000007720	1		ENSGALG00000025773
Gga.10317.1.S1_at	ENSGALG00000025774	1	6	25	1005	986	GATCTGGCTCTTCCCATTGC	0.006	38.1	100		ENSGALG00000027641	1		ENSGALG00000020561	1		ENSGALG00000004081	1		ENSGALG00000026114
Gga.1032.1.S1_at	ENSGALG00000005538	11	1	25	1571	1595	GAGCAGATGCACACCGATAGCTACT	1e-05	47.3	100		ENSGALG00000012938	1		ENSGALG00000026761	1		ENSGALG00000028641	1		ENSGALG00000008780
Gga.10320.1.S1_at	ENSGALG00000001179	11	1	25	29859	29883	TGTTGTATAATGCAGTTCCCCTAAT	1e-05	47.3	100		ENSGALG00000015929	1		ENSGALG00000009958	2		ENSGALG00000013369	1		ENSGALG00000022662
Gga.10321.1.S1_a_at	ENSGALG00000028284	10	1	25	701	725	ATGCTGAGAGGCTCTGCGAGTCCCA	1e-05	47.3	100		ENSGALG00000007616	2		ENSGALG00000026372	1		ENSGALG00000026930	1		ENSGALG00000002157
Gga.10321.2.A1_at	ENSGALG00000028284	11	1	25	4111	4087	GATTGAGCTTTGTTCCGTAGGAGAA	1e-05	47.3	100		ENSGALG00000005087	1		ENSGALG00000028772	1		ENSGALG00000009898	1		ENSGALG00000012695
Gga.10323.1.A1_at	ENSGALG00000013411	5	1	25	126	102	TTTCTGCACATTGGTCGAGAGCTCC	1e-05	47.3	100		ENSGALG00000015886	1		ENSGALG00000013741	1		ENSGALG00000012288	1		ENSGALG00000006434
Gga.10323.1.S1_at	ENSGALG00000013411	7	1	25	101	125	TGGAGCTCTCGACCAATGTGCAGAA	1e-05	47.3	100		ENSGALG00000006358	1		ENSGALG00000000312	1		ENSGALG00000003490	1		ENSGALG00000027890
Gga.10326.1.S1_s_at	ENSGALG00000002632	6	1	25	10	34	AACTGGATCACATTTTTGCTGTTCT	1e-05	47.3	100		ENSGALG00000001678	3		ENSGALG00000010543	1		ENSGALG00000016919	1		ENSGALG00000027255
Gga.10327.1.A1_at	ENSGALG00000014014	11	1	25	211763	211739	ACGATCCTTTTGGTTTACGCACAAT	1e-05	47.3	100		ENSGALG00000016389	1		ENSGALG00000008482	1		ENSGALG00000009839	1		ENSGALG00000019361
Gga.10327.1.S1_at	ENSGALG00000014014	11	1	25	212590	212614	ATATTCATGGCCTTCAATAGAGCAA	1e-05	47.3	100		ENSGALG00000016931	2		ENSGALG00000007095	3		ENSGALG00000001262	1		ENSGALG00000000441
Gga.10330.1.S1_at	ENSGALG00000026900	11	1	25	640	664	GTATGTCGATGTGTTAGTGCCTGCC	1e-05	47.3	100		ENSGALG00000012572	1		ENSGALG00000015528	3		ENSGALG00000010288	1		ENSGALG00000014848
Gga.10331.1.A1_at	ENSGALG00000018512	2	2	22	5266	5286	TCACTTCTGTGTTCTCACACA	0.081	34.4	95.24		ENSGALG00000013327	1		ENSGALG00000023364	1		ENSGALG00000009458	1		ENSGALG00000000181
Gga.10331.1.S1_at	ENSGALG00000018512	1	9	25	5286	5270	TGTGTGAGAACACAGAA	0.29	32.5	100		ENSGALG00000007720	4		ENSGALG00000015918	2		ENSGALG00000012256	1		ENSGALG00000010835
Gga.10332.1.S1_at	ENSGALG00000023130	22	1	25	20031	20007	GGCTCTCGGAGCATGACATTGTCGT	1e-05	47.3	100		ENSGALG00000004081	3		ENSGALG00000010892	1		ENSGALG00000006407	1		ENSGALG00000023906
Gga.10335.1.S1_at	ENSGALG00000028691	11	1	25	6855	6879	AAACACTGTGAGCAGGGCCCATCTC	1e-05	47.3	100		ENSGALG00000019796	1		ENSGALG00000002817	1		ENSGALG00000017235	1		ENSGALG00000009481
Gga.10336.1.A1_at	ENSGALG00000011227	11	1	25	20416	20392	GCATGTGTCTGTACACACGTGTGCA	1e-05	47.3	100		ENSGALG00000028641	1		ENSGALG00000029153	3		ENSGALG00000016707	1		ENSGALG00000024078
Gga.10336.1.S1_at	ENSGALG00000011227	11	1	25	20245	20269	ACGTACGTGCCCATATGTATACATT	1e-05	47.3	100		ENSGALG00000011650	1		ENSGALG00000016477	3		ENSGALG00000028360	1		ENSGALG00000026925
Gga.10337.1.S1_at	ENSGALG00000017254	11	1	25	135125	135149	TAGAGGCCTTCAGCTGGGACCTTTC	1e-05	47.3	100		ENSGALG00000026930	4		ENSGALG00000006034	1		ENSGALG00000013647	1		ENSGALG00000009091
Gga.10338.1.A1_at	ENSGALG00000007352	11	1	25	23851	23827	GGTAAGAACCGTACTGCCATATCCC	1e-05	47.3	100		ENSGALG00000012288	1		ENSGALG00000008430	2		ENSGALG00000008771	1		ENSGALG00000014234
Gga.10338.1.S1_at	ENSGALG00000007352	11	1	25	23669	23693	AGGATACTCAGGTACTCTGACCCAC	1e-05	47.3	100		ENSGALG00000014729	1		ENSGALG00000012033	1		ENSGALG00000016968	1		ENSGALG00000020486
Gga.10339.1.S1_at	ENSGALG00000008544	11	1	25	61222	61246	TCTGGTTTCTGGGACGGAAGCTCTC	1e-05	47.3	100		ENSGALG00000000362	2		ENSGALG00000001051	3		ENSGALG00000010030	1		ENSGALG00000014607
Gga.10340.1.S1_at	ENSGALG00000004816	11	1	25	3569	3593	GCTCCTTAACATCACTGACCAATGA	1e-05	47.3	100		ENSGALG00000015305	1		ENSGALG00000018634	4		ENSGALG00000003837	1		ENSGALG00000020271
Gga.10346.1.S1_at	ENSGALG00000012554	11	1	25	2498	2522	TTCTGGAGGCTTAGGTGAGCTGTCC	1e-05	47.3	100		ENSGALG00000007539	1		ENSGALG00000001334	2		ENSGALG00000013635	1		ENSGALG00000000894
Gga.10348.1.S1_at	ENSGALG00000014661	1	5	22	129637	129620	CCAGGTTTTTTCTGCTGT	0.081	34.4	100		ENSGALG00000003490	4		ENSGALG00000015155	1		ENSGALG00000017013	1		ENSGALG00000002290
Gga.1035.2.S1_a_at	ENSGALG00000028112	6	1	25	2642	2666	GAGCCTGGCAAGGTGTTCATCTGCA	1e-05	47.3	100		ENSGALG00000016919	1		ENSGALG00000006208	2		ENSGALG00000026936	1		ENSGALG00000027098
Gga.10350.1.S1_at	ENSGALG00000007100	11	1	25	6080	6104	GATATCGTTGAGGTAACAATCTGAA	1e-05	47.3	100		ENSGALG00000001262	3		ENSGALG00000024381	1		ENSGALG00000006342	1		ENSGALG00000005323
Gga.10351.2.S1_x_at	ENSGALG00000004480	3	1	25	3919	3943	GACAGCAGCTGTCAAGCACTCTGGT	1e-05	47.3	100		ENSGALG00000009458	3		ENSGALG00000006094	2		ENSGALG00000014986	1		ENSGALG00000012310
Gga.10352.1.A1_at	ENSGALG00000013312	11	1	25	1133	1109	GAGGCAGCTGGTTCAAAACTTATCA	1e-05	47.3	100		ENSGALG00000024396	1		ENSGALG00000016263	4		ENSGALG00000011531	1		ENSGALG00000001459
Gga.10352.1.S1_at	ENSGALG00000013312	11	1	25	1995	2019	GTGTTGTGCCAAAGTGGTCTTCTGT	1e-05	47.3	100		ENSGALG00000006407	2		ENSGALG00000013911	1		ENSGALG00000010555	1		ENSGALG00000010571
Gga.10353.1.S1_at	ENSGALG00000001467	11	1	25	523	547	GAGCATGTACTTGCTAGCTACAAAG	1e-05	47.3	100		ENSGALG00000017235	2		ENSGALG00000007940	1		ENSGALG00000012615	1		ENSGALG00000026902
Gga.10354.1.S1_at	ENSGALG00000012378	10	1	25	12	36	ACATGAGCCTTGTTATGATCAGTGA	1e-05	47.3	100		ENSGALG00000005958	2		ENSGALG00000019382	5		ENSGALG00000008314	1		ENSGALG00000021057
Gga.10355.1.S1_at	ENSGALG00000012206	11	1	25	8092	8116	GTTTCAGCCGAAGTTACTGTGCAGA	1e-05	47.3	100		ENSGALG00000016642	3		ENSGALG00000004394	3		ENSGALG00000002779	1		ENSGALG00000014852
Gga.10358.1.A1_at	ENSGALG00000009698	11	1	25	5944	5920	TTAAAATCCATCTCTTGTCATGCCC	1e-05	47.3	100		ENSGALG00000003265	2		ENSGALG00000026051	1		ENSGALG00000014413	1		ENSGALG00000015838
Gga.10358.1.S1_at	ENSGALG00000009698	11	1	25	6828	6852	TATAATATTTTCATCTCACTCCCAC	1e-05	47.3	100		ENSGALG00000013647	2		ENSGALG00000014038	1		ENSGALG00000008857	1		ENSGALG00000024014
Gga.10359.1.S1_at	ENSGALG00000004498	6	1	25	3488	3512	TTCAGCCTTGGCTGCTTCAAGCAGG	1e-05	47.3	100		ENSGALG00000017322	1		ENSGALG00000005791	2		ENSGALG00000000098	1		ENSGALG00000026368
Gga.10360.1.S1_at	ENSGALG00000006314	11	1	25	76326	76350	GATCTCTTCAGTGCTGATTTCAAAA	1e-05	47.3	100		ENSGALG00000010030	3		ENSGALG00000009107	11		ENSGALG00000006572	1		ENSGALG00000011690
Gga.10361.1.S1_at	ENSGALG00000002719	11	1	25	1516	1540	GGTTGTTACTCTCCCATGTATGGAA	1e-05	47.3	100		ENSGALG00000003837	4		ENSGALG00000011762	1		ENSGALG00000004490	1		ENSGALG00000027212
Gga.10362.1.S1_at	ENSGALG00000015127	1	5	23	44952	44970	TTACATTGCTGTGCCCCAG	0.023	36.2	100		ENSGALG00000015925	3		ENSGALG00000021324	3		ENSGALG00000008313	1		ENSGALG00000026593
Gga.10363.1.S1_at	ENSGALG00000003440	11	1	25	4087	4111	TATTGACAGTTGTTTAACCCAGCAG	1e-05	47.3	100		ENSGALG00000002006	2		ENSGALG00000016807	3		ENSGALG00000027617	1		ENSGALG00000012285
Gga.10365.1.S1_at	ENSGALG00000016784	11	1	25	1872	1896	AAGCTTTGTGGACATGTCCTCGGAT	1e-05	47.3	100		ENSGALG00000011335	2		ENSGALG00000007653	1		ENSGALG00000012702	1		ENSGALG00000015219
Gga.10367.1.S1_s_at	ENSGALG00000006917	10	1	25	6957	6981	GAGTAACTACAAATCCCTGGCACTG	1e-05	47.3	100		ENSGALG00000006342	1		ENSGALG00000012303	10		ENSGALG00000013768	1		ENSGALG00000027020
Gga.10368.1.S1_at	ENSGALG00000007691	8	1	25	2832	2856	GAGAGAACATGTATTTGATGGAAGA	1e-05	47.3	100		ENSGALG00000014986	1		ENSGALG00000008457	2		ENSGALG00000003916	1		ENSGALG00000007782
Gga.10369.1.S1_at	ENSGALG00000001444	11	1	25	5531	5555	CACCCTGCTATTATGCCATTACAGC	1e-05	47.3	100		ENSGALG00000012615	1		ENSGALG00000003605	4		ENSGALG00000011961	1		ENSGALG00000021020
Gga.1037.1.S1_at	ENSGALG00000004928	1	4	24	16297	16318	GCTTCTGTGTGTGCT-TTAATT	0.081	34.4	95.45		ENSGALG00000000927	1		ENSGALG00000004363	2		ENSGALG00000008852	1		ENSGALG00000029041
Gga.10372.1.A1_at	ENSGALG00000005208	2	9	25	899	883	TTGAGCACGGCCAGCAC	0.29	32.5	100		ENSGALG00000006277	1		ENSGALG00000028043	4		ENSGALG00000002715	1		ENSGALG00000026253
Gga.10372.1.S1_at	ENSGALG00000000966	1	5	23	11211	11193	CATCCACATCGAGCAGCTG	0.023	36.2	100		ENSGALG00000008314	1		ENSGALG00000028531	1		ENSGALG00000008562	1		ENSGALG00000009044
Gga.10375.1.S1_at	ENSGALG00000025971	6	1	25	221	197	GCCTTGTGCGGCTTCAGCTTGAGGA	1e-05	47.3	100		ENSGALG00000025766	1		ENSGALG00000009783	2		ENSGALG00000015869	1		ENSGALG00000023844
Gga.10377.1.S1_at	ENSGALG00000018760	9	1	25	78	102	CAACATCTGGGTGGCGTACGACAAG	1e-05	47.3	100		ENSGALG00000014413	1		ENSGALG00000002703	1		ENSGALG00000003826	1		ENSGALG00000027787
Gga.10378.1.S1_at	ENSGALG00000007170	11	1	25	2802	2778	GAACAAGCACAGACACATTGCCCAA	1e-05	47.3	100		ENSGALG00000002686	1		ENSGALG00000009699	3		ENSGALG00000005631	1		ENSGALG00000016799
Gga.1038.1.S1_at	ENSGALG00000007552	11	1	25	39342	39366	GATCTGTATGTATTCCAGTTCCGTA	1e-05	47.3	100		ENSGALG00000008857	1		ENSGALG00000010294	1		ENSGALG00000016549	1		ENSGALG00000011357
Gga.10381.1.S1_at	ENSGALG00000002804	11	1	25	359	383	TCCGCAGTGGGCGTCAAACGCTGAA	1e-05	47.3	100		ENSGALG00000006572	2		ENSGALG00000007840	2		ENSGALG00000007113	1		ENSGALG00000014445
Gga.10383.1.S1_at	ENSGALG00000015103	11	1	25	8114	8138	GCAGAGCTGCAAGGTAAGTTTCAAA	1e-05	47.3	100		ENSGALG00000006723	3		ENSGALG00000010372	2		ENSGALG00000005374	1		ENSGALG00000028939
Gga.10384.1.S1_at	ENSGALG00000029174	10	1	25	2626	2650	TCACAGGAGGTAACTGCCTAACCAC	1e-05	47.3	100		ENSGALG00000004999	1		ENSGALG00000018800	1		ENSGALG00000011442	1		ENSGALG00000017090
Gga.10385.1.S1_at	ENSGALG00000020316	11	1	25	2691	2667	TTTACCAGTCCTGCTTGTGCTTTAA	1e-05	47.3	100		ENSGALG00000004474	2		ENSGALG00000027535	1		ENSGALG00000007989	1		ENSGALG00000009227
Gga.10386.1.S1_at	ENSGALG00000012523	11	1	25	4034	4058	ACAAGCTCAATCTGCTATCCAGCAA	1e-05	47.3	100		ENSGALG00000004261	1		ENSGALG00000000766	1		ENSGALG00000005350	1		ENSGALG00000027578
Gga.1039.2.S1_at	ENSGALG00000000379	11	1	25	7101	7125	ACCTGCGGCCAGGTAAGAGCCTGTA	1e-05	47.3	100		ENSGALG00000010748	1		ENSGALG00000011565	3		ENSGALG00000016803	1		ENSGALG00000026754
Gga.10391.1.S1_at	ENSGALG00000001711	11	1	25	179	203	AACTCAGTTCTGGATGACCTCAGGA	1e-05	47.3	100		ENSGALG00000013768	1		ENSGALG00000016269	2		ENSGALG00000001093	1		ENSGALG00000029124
Gga.10393.1.A1_at	ENSGALG00000010471	11	1	25	12200	12176	CATTCTCTCATTTCTTCATGTTTTG	1e-05	47.3	100		ENSGALG00000008381	1		ENSGALG00000014523	2		ENSGALG00000010893	1		ENSGALG00000000548
Gga.10393.1.S1_at	ENSGALG00000010471	11	1	25	12092	12116	CAGTGCTTACTGGAGATGGGTAGAA	1e-05	47.3	100		ENSGALG00000017082	1		ENSGALG00000004144	3		ENSGALG00000014936	1		ENSGALG00000005259
Gga.10394.1.S1_at	ENSGALG00000012638	11	1	25	8554	8578	GCACTGGAGGTCAGGCTTTCAAACT	1e-05	47.3	100		ENSGALG00000027664	1		ENSGALG00000012783	4		ENSGALG00000003812	1		ENSGALG00000013651
Gga.10395.1.S1_at	ENSGALG00000026333	11	1	25	1267	1243	GGATTTGTAGTGTGTGCCCCATCAG	1e-05	47.3	100		ENSGALG00000027550	3		ENSGALG00000027286	1		ENSGALG00000002837	1		ENSGALG00000019710
Gga.10396.1.S1_at	ENSGALG00000003253	1	5	23	8979	8961	GTTCTTGGACCACAGGCCA	0.023	36.2	100		ENSGALG00000008852	1		ENSGALG00000012938	1		ENSGALG00000013987	1		ENSGALG00000019587
Gga.10397.1.A1_at	ENSGALG00000007972	1	7	25	14182	14164	CTGGTGTACCTTTGGGCAA	0.023	36.2	100		ENSGALG00000026985	1		ENSGALG00000003488	14		ENSGALG00000014682	1		ENSGALG00000014639
Gga.10397.1.S1_at	ENSGALG00000007972	1	3	21	14164	14182	TTGCCCAAAGGTACACCAG	0.023	36.2	100		ENSGALG00000002112	1		ENSGALG00000015929	2		ENSGALG00000008405	1		ENSGALG00000001634
Gga.10398.1.A1_at	ENSGALG00000026924	10	1	25	58309	58285	GATAGTCAGGGAACCGATGGCTTAT	1e-05	47.3	100		ENSGALG00000005631	3		ENSGALG00000007616	2		ENSGALG00000002119	1		ENSGALG00000009682
Gga.1040.1.S1_at	ENSGALG00000013254	1	3	20	12202	12185	CTCATCGCAGATCTGTGC	0.081	34.4	100		ENSGALG00000007113	1		ENSGALG00000001604	1		ENSGALG00000002319	1		ENSGALG00000026293
Gga.10403.1.A1_at	ENSGALG00000024120	11	1	25	1550	1526	CACGGGATTTGCATGAGGGCTCGCT	1e-05	47.3	100		ENSGALG00000016891	2		ENSGALG00000014575	1		ENSGALG00000003251	1		ENSGALG00000007283
Gga.10403.1.S1_at	ENSGALG00000024120	11	1	25	1205	1229	AGCTTCCCGCGATGCTCTTGGAGAA	1e-05	47.3	100		ENSGALG00000002003	1		ENSGALG00000016389	1		ENSGALG00000000427	1		ENSGALG00000015342
Gga.10404.1.A1_at	ENSGALG00000026092	14	1	25	213	189	GAAATAGTTATTCCGGTGCCTGAGA	1e-05	47.3	100		ENSGALG00000007989	1		ENSGALG00000016931	1		ENSGALG00000005150	1		ENSGALG00000026003
Gga.10404.1.S1_at	ENSGALG00000026092	15	1	25	11729	11753	GGATGTCTCAGTCTCTAGCCTATCC	1e-05	47.3	100		ENSGALG00000001093	2		ENSGALG00000025950	2		ENSGALG00000015424	1		ENSGALG00000015367
Gga.10407.1.S1_at	ENSGALG00000012791	11	1	25	73347	73371	GTCTCTCTGCTTTTCATGTCAGTCA	1e-05	47.3	100		ENSGALG00000013627	1		ENSGALG00000007720	3		ENSGALG00000015758	1		ENSGALG00000005469
Gga.10408.1.A1_at	ENSGALG00000003425	5	1	25	260	236	GTGGTACTGCATGATGAGCGTCCCC	1e-05	47.3	100		ENSGALG00000002576	1		ENSGALG00000012572	3		ENSGALG00000012000	1		ENSGALG00000020840
Gga.10408.1.S1_at	ENSGALG00000003425	11	1	25	979	1003	TGAGGAACTGCTACGAGCTCACTCT	1e-05	47.3	100		ENSGALG00000025825	1		ENSGALG00000008228	1		ENSGALG00000016861	1		ENSGALG00000009936
Gga.1041.3.S1_a_at	ENSGALG00000011232	1	1	23	1803	1781	AAGACTGAAAGCCAGCTCTGCCT	0.0001	43.6	100		ENSGALG00000014936	1		ENSGALG00000004081	2		ENSGALG00000006777	1		ENSGALG00000000302
Gga.10411.1.S1_at	ENSGALG00000010304	11	1	25	13821	13797	ATGTTCCTCAGCCACAAGATCTAGA	1e-05	47.3	100		ENSGALG00000028451	1		ENSGALG00000028641	1		ENSGALG00000027471	1		ENSGALG00000022234
Gga.10412.1.S1_at	ENSGALG00000011901	11	1	25	16171	16195	GTTAATCTTGGTTCCAGTTTTGGAG	1e-05	47.3	100		ENSGALG00000014682	1		ENSGALG00000013369	1		ENSGALG00000023497	1		ENSGALG00000004675
Gga.10413.1.S1_at	ENSGALG00000004760	11	1	25	7003	7027	GACTGAGCCTCTTGAGAACCAGCCA	1e-05	47.3	100		ENSGALG00000006552	1		ENSGALG00000026930	1		ENSGALG00000028422	1		ENSGALG00000002097
Gga.10415.1.S1_a_at	ENSGALG00000007304	1	2	24	1069	1091	TACTTGTGCAGAAATCACCAGCA	0.006	38.1	95.65		ENSGALG00000013987	3		ENSGALG00000009898	1		ENSGALG00000006757	1		ENSGALG00000011699
Gga.10415.1.S1_at	ENSGALG00000016445	9	1	25	40270	40294	ACTCTCGGAGATCGTTTGAAGCTTG	1e-05	47.3	100		ENSGALG00000003251	2		ENSGALG00000014794	2		ENSGALG00000012405	1		ENSGALG00000012100
Gga.10417.1.S1_at	ENSGALG00000015438	11	1	25	3602	3626	GGACCATCTTTCACCATCTTTGTTA	1e-05	47.3	100		ENSGALG00000005150	1		ENSGALG00000012288	1		ENSGALG00000009079	1		ENSGALG00000009652
Gga.10419.1.S1_at	ENSGALG00000028340	2	1	25	2036	2060	GGAGCCCATCTGAATTACCATCGTT	1e-05	47.3	100		ENSGALG00000015424	2		ENSGALG00000019622	1		ENSGALG00000007167	1		ENSGALG00000019267
Gga.1042.1.S1_at	ENSGALG00000026924	1	5	21	153568	153552	CTAATTCCTTTTCCCAG	0.29	32.5	100		ENSGALG00000018700	1		ENSGALG00000016919	1		ENSGALG00000015828	1		ENSGALG00000002991
Gga.10424.1.S1_at	ENSGALG00000008915	11	1	25	1906	1930	GAGCGTTGCTGTGAGTTTTCAGTTC	1e-05	47.3	100		ENSGALG00000004342	2		ENSGALG00000003490	1		ENSGALG00000009304	1		ENSGALG00000019864
Gga.10425.1.S1_s_at	ENSGALG00000016467	11	1	25	36549	36525	GAAGTGTATTGATCTTTGCCTGAAT	1e-05	47.3	100		ENSGALG00000016861	1		ENSGALG00000009839	2		ENSGALG00000025924	1		ENSGALG00000012217
Gga.10426.1.S1_s_at	ENSGALG00000006203	7	1	25	3800	3824	GCTGCACCAGGATGGGCTGAAGCAA	1e-05	47.3	100		ENSGALG00000008354	1		ENSGALG00000001262	2		ENSGALG00000016554	1		ENSGALG00000017168
Gga.10428.1.S1_s_at	ENSGALG00000023869	2	4	24	3555	3575	GCAGTCTCCAACAGTGACAAC	0.002	39.9	100		ENSGALG00000006190	2		ENSGALG00000010288	1		ENSGALG00000010391	1		ENSGALG00000029017
Gga.10429.2.S1_a_at	ENSGALG00000010971	11	1	25	16529	16505	GCACACTACATACTCTTAAATCCAA	1e-05	47.3	100		ENSGALG00000015549	3		ENSGALG00000009458	6		ENSGALG00000011120	1		ENSGALG00000005438
Gga.1043.1.S1_s_at	ENSGALG00000000276	1	5	24	215027	215008	TTCTTAACATCTTTGAGATT	0.006	38.1	100		ENSGALG00000016463	1		ENSGALG00000012256	7		ENSGALG00000010536	1		ENSGALG00000015535
Gga.10431.1.S1_at	ENSGALG00000015490	11	1	25	26877	26901	GATCCATTTTATAGTAAGCTGCTGT	1e-05	47.3	100		ENSGALG00000027471	2		ENSGALG00000006407	2		ENSGALG00000009747	1		ENSGALG00000023694
Gga.10436.1.S1_at	ENSGALG00000001332	11	1	25	1221	1197	TAAGAAGCGCTCTGTGCATCAGGAA	1e-05	47.3	100		ENSGALG00000004171	2		ENSGALG00000017235	3		ENSGALG00000013124	1		ENSGALG00000026947
Gga.10440.1.A1_at	ENSGALG00000012027	1	1	19	155660	155642	GAAAGGCTTTTAGCAACCA	0.023	36.2	100		ENSGALG00000011882	1		ENSGALG00000016707	2		ENSGALG00000004280	1		ENSGALG00000015338
Gga.10442.1.S1_at	ENSGALG00000000258	1	6	24	13211	13193	TCTAGATTTCTTTTCCAGG	0.023	36.2	100		ENSGALG00000015025	1		ENSGALG00000028360	3		ENSGALG00000014689	1		ENSGALG00000010936
Gga.10443.1.S1_at	ENSGALG00000010108	10	1	25	278	254	GCAGAAGTTACGCTTACCTTCGTAG	1e-05	47.3	100		ENSGALG00000028422	2		ENSGALG00000016244	1		ENSGALG00000026957	1		ENSGALG00000024298
Gga.10445.1.S1_at	ENSGALG00000009570	10	1	25	6070	6046	GTACATCCTCCTGAATAATTTCCTA	1e-05	47.3	100		ENSGALG00000005096	1		ENSGALG00000013647	6		ENSGALG00000008602	1		ENSGALG00000004640
Gga.10447.1.S1_at	ENSGALG00000011722	1	2	20	14352	14370	AGTTCACATATCCTCAGAG	0.023	36.2	100		ENSGALG00000012405	2		ENSGALG00000010583	1		ENSGALG00000012341	1		ENSGALG00000028712
Gga.10448.1.A1_at	ENSGALG00000015331	11	1	25	13757	13733	GTACTTTACTTGGTTGCGGGACTGA	1e-05	47.3	100		ENSGALG00000020233	1		ENSGALG00000008771	1		ENSGALG00000003861	1		ENSGALG00000010357
Gga.10448.1.S1_at	ENSGALG00000015331	11	1	25	13464	13488	TGGCTCACATTCAACTTGCTGTCAG	1e-05	47.3	100		ENSGALG00000007821	4		ENSGALG00000016968	1		ENSGALG00000002457	1		ENSGALG00000023735
Gga.10449.1.S1_at	ENSGALG00000014233	10	1	25	77176	77200	AGGACCTTCCTTGCCTCTTCTTCCT	1e-05	47.3	100		ENSGALG00000019447	1		ENSGALG00000003837	1		ENSGALG00000028086	1		ENSGALG00000020753
Gga.1045.1.S1_at	ENSGALG00000016594	1	6	23	211959	211976	GAGAGATTTGTCATTTGA	0.081	34.4	100		ENSGALG00000016769	3		ENSGALG00000010030	3		ENSGALG00000004613	1		ENSGALG00000027253
Gga.10450.1.S1_at	ENSGALG00000007138	11	1	25	1253	1277	GAAGGAGACTGCAGTCTCTGCCCAT	1e-05	47.3	100		ENSGALG00000025924	1		ENSGALG00000013635	2		ENSGALG00000001099	1		ENSGALG00000028085
Gga.10451.1.S1_at	ENSGALG00000002969	10	1	25	8890	8866	ACGGATGCTGCATGGCTGTGACCTG	1e-05	47.3	100		ENSGALG00000014687	1		ENSGALG00000017013	1		ENSGALG00000014349	1		ENSGALG00000006354
Gga.10452.1.S1_at	ENSGALG00000004073	11	1	25	32962	32986	ACTTCATATGAATCTGGGTTTTCTG	1e-05	47.3	100		ENSGALG00000016554	2		ENSGALG00000026936	1		ENSGALG00000009048	1		ENSGALG00000007138
Gga.10453.1.S1_a_at	ENSGALG00000000946	11	1	25	29097	29121	ATGCGTCTAGGAATGATCTCCCTCC	1e-05	47.3	100		ENSGALG00000010391	3		ENSGALG00000006342	2		ENSGALG00000002199	1		ENSGALG00000009185
Gga.10454.1.S1_at	ENSGALG00000017029	1	9	25	12337	12353	GGCCATTTTCAAGATGG	0.29	32.5	100		ENSGALG00000010536	2		ENSGALG00000011531	1		ENSGALG00000014890	1		ENSGALG00000028065
Gga.10456.1.S1_at	ENSGALG00000005294	11	1	25	49399	49423	GTTAGTGCTGCATGAGACTGTAGTT	1e-05	47.3	100		ENSGALG00000025928	1		ENSGALG00000014986	1		ENSGALG00000008659	1		ENSGALG00000009261
Gga.10458.1.S1_at	ENSGALG00000005573	1	4	25	7400	7421	GCTCCAGCAGCTCTCAGGAGGA	0.023	36.2	95.45		ENSGALG00000004280	3		ENSGALG00000012615	9		ENSGALG00000011148	1		ENSGALG00000007374
Gga.10460.1.S1_a_at	ENSGALG00000018634	11	1	25	826	802	GAAGTTCTCTCCCTGGGTCACAAGG	1e-05	47.3	100		ENSGALG00000014689	1		ENSGALG00000010555	2		ENSGALG00000001419	1		ENSGALG00000013404
Gga.10460.3.A1_at	ENSGALG00000018634	7	1	25	6286	6310	TGAGCAGGGTGAGGACCACTTCCCT	1e-05	47.3	100		ENSGALG00000026957	1		ENSGALG00000008314	1		ENSGALG00000008527	1		ENSGALG00000019030
Gga.10461.1.S1_at	ENSGALG00000008312	1	7	25	6542	6524	CATTTTACCATGCTTTAAA	0.023	36.2	100		ENSGALG00000008602	4		ENSGALG00000014413	2		ENSGALG00000008018	1		ENSGALG00000021038
Gga.10467.1.A1_at	ENSGALG00000014378	11	1	25	2278	2254	TAATCCGCTTGGTATCAGTAAGGCC	1e-05	47.3	100		ENSGALG00000027682	2		ENSGALG00000000474	2		ENSGALG00000015001	1		ENSGALG00000026821
Gga.10467.1.S1_at	ENSGALG00000014378	11	1	25	1963	1987	GAAGTTGTCTGAGCAGGACTGTGTT	1e-05	47.3	100		ENSGALG00000002457	1		ENSGALG00000002779	1		ENSGALG00000002699	1		ENSGALG00000013772
Gga.10469.1.S1_at	ENSGALG00000019444	11	1	25	1593	1617	GATGTGGAAGTTGCTCACTAGAACT	1e-05	47.3	100		ENSGALG00000028086	1		ENSGALG00000008857	1		ENSGALG00000015479	1		ENSGALG00000025868
Gga.1047.1.S1_at	ENSGALG00000007334	11	1	25	10973	10949	AGACAGGAGCTTGTTTCATTGCCAA	1e-05	47.3	100		ENSGALG00000012338	1		ENSGALG00000004490	1		ENSGALG00000010826	1		ENSGALG00000016054
Gga.10470.1.S1_at	ENSGALG00000008798	11	1	25	5026	5050	GCTGACTGTGTCTGTATCAAAGATG	1e-05	47.3	100		ENSGALG00000009539	1		ENSGALG00000006572	2		ENSGALG00000001346	1		ENSGALG00000004149
Gga.10473.1.S1_at	ENSGALG00000015200	11	1	25	14178	14202	GGTTTAAGATACCACTCCTTCAGAT	1e-05	47.3	100		ENSGALG00000005445	1		ENSGALG00000000098	2		ENSGALG00000012364	1		ENSGALG00000016080
Gga.10474.1.S1_at	ENSGALG00000015248	19	1	25	28581	28605	GGAGTAGTCACTACGCCATTGACAA	1e-05	47.3	100		ENSGALG00000004613	1		ENSGALG00000008313	1		ENSGALG00000010114	1		ENSGALG00000015274
Gga.10476.1.S1_at	ENSGALG00000028517	13	1	25	81607	81631	GGCCCTGTGCTAAGAGAGACCCTGG	1e-05	47.3	100		ENSGALG00000026718	1		ENSGALG00000027617	4		ENSGALG00000016702	1		ENSGALG00000021819
Gga.10477.1.S1_at	ENSGALG00000017119	11	1	25	37674	37698	GCTATTTGGGTATGATTTGTTTGTT	1e-05	47.3	100		ENSGALG00000001099	4		ENSGALG00000028584	1		ENSGALG00000008425	1		ENSGALG00000016749
Gga.10480.1.A1_at	ENSGALG00000013776	11	1	25	12252	12228	AAGATCTTCTTACTTGCTCATAAAG	1e-05	47.3	100		ENSGALG00000003856	2		ENSGALG00000013768	2		ENSGALG00000008135	1		ENSGALG00000001416
Gga.10480.1.S1_at	ENSGALG00000013776	11	1	25	11897	11921	GCTGGTTTGCTTTTTCTGTTTAACA	1e-05	47.3	100		ENSGALG00000002199	2		ENSGALG00000012702	6		ENSGALG00000000620	1		ENSGALG00000028856
Gga.10482.1.A1_at	ENSGALG00000002574	11	1	25	9903	9879	AGAAGTCTGTTCATCCTAACATCCC	1e-05	47.3	100		ENSGALG00000002740	2		ENSGALG00000003916	2		ENSGALG00000014218	1		ENSGALG00000026576
Gga.10482.1.S1_at	ENSGALG00000002574	11	1	25	9672	9696	GTGTGAATTCTCAATTTCCTCCTTT	1e-05	47.3	100		ENSGALG00000006550	1		ENSGALG00000011961	1		ENSGALG00000011639	1		ENSGALG00000016582
Gga.10483.1.A1_at	ENSGALG00000012438	1	4	22	24460	24478	ACTTTGCTGCACAGAGGGC	0.023	36.2	100		ENSGALG00000016600	1		ENSGALG00000008852	1		ENSGALG00000013985	1		ENSGALG00000026788
Gga.10483.1.S1_at	ENSGALG00000006997	1	3	20	26633	26650	GACCAAGTTTCTGTACCA	0.081	34.4	100		ENSGALG00000008527	7		ENSGALG00000002715	3		ENSGALG00000003454	1		ENSGALG00000029062
Gga.10484.1.A1_at	ENSGALG00000010992	11	1	25	341	317	AACATCTGCATCTTTTTCTTCCTGA	1e-05	47.3	100		ENSGALG00000008018	1		ENSGALG00000021738	1		ENSGALG00000010183	1		ENSGALG00000020151
Gga.10484.1.S1_at	ENSGALG00000010992	11	1	25	888	912	TTGGTTACCTTTAGCTCCTAGTTCT	1e-05	47.3	100		ENSGALG00000016385	1		ENSGALG00000008562	1		ENSGALG00000009421	1		ENSGALG00000002090
Gga.10487.1.S1_at	ENSGALG00000014773	1	1	25	60501	60478	TTCCCTTCCCACAGTGGAAATCGCT	0.002	39.9	96		ENSGALG00000001946	1		ENSGALG00000005631	1		ENSGALG00000002980	1		ENSGALG00000014537
Gga.10488.1.A1_at	ENSGALG00000017145	11	1	25	4841	4817	GAATTCAAGCAGCACTTCTTTGCAG	1e-05	47.3	100		ENSGALG00000003537	1		ENSGALG00000021875	2		ENSGALG00000007334	1		ENSGALG00000001271
Gga.10488.1.S1_at	ENSGALG00000017145	11	1	25	5499	5523	GAATTGAGCTGCTGGATGTCCCGTT	1e-05	47.3	100		ENSGALG00000016169	2		ENSGALG00000015869	2		ENSGALG00000016454	1		ENSGALG00000003492
Gga.10489.1.S1_at	ENSGALG00000011085	11	1	25	3747	3771	GTTTTGTCTGTTTATCATGTTTGCA	1e-05	47.3	100		ENSGALG00000023308	1		ENSGALG00000003826	1		ENSGALG00000002922	1		ENSGALG00000017394
Gga.1049.1.S1_at	ENSGALG00000010159	11	1	25	12554	12578	GTCTTATCTGGCCTTTTATCCTTAA	1e-05	47.3	100		ENSGALG00000028550	1		ENSGALG00000007113	4		ENSGALG00000027830	1		ENSGALG00000010711
Gga.10490.1.A1_at	ENSGALG00000008041	11	1	25	4879	4855	GAACTCCTTATTACAACCTCATATC	1e-05	47.3	100		ENSGALG00000016238	2		ENSGALG00000016549	3		ENSGALG00000029130	1		ENSGALG00000009945
Gga.10491.1.S1_at	ENSGALG00000015037	10	1	25	12032	12056	GTATTTTTATAGTGCTCCAGTGGAG	1e-05	47.3	100		ENSGALG00000015479	3		ENSGALG00000011442	3		ENSGALG00000004783	1		ENSGALG00000023818
Gga.10494.1.S1_at	ENSGALG00000010982	11	1	25	25821	25845	TATAGGCACACAATTCTGAATCTCT	1e-05	47.3	100		ENSGALG00000001346	1		ENSGALG00000005374	2		ENSGALG00000005858	1		ENSGALG00000027622
Gga.10495.1.A1_at	ENSGALG00000027213	11	1	25	107	83	GTTTCCATAACGTGCTCCAAAGTGC	1e-05	47.3	100		ENSGALG00000010114	1		ENSGALG00000007989	1		ENSGALG00000005685	1		ENSGALG00000002682
Gga.10495.1.S1_at	ENSGALG00000027213	11	1	25	894	918	TACTAAGCCACTGAATAATGTGCAG	1e-05	47.3	100		ENSGALG00000012364	1		ENSGALG00000005350	2		ENSGALG00000000979	1		ENSGALG00000005689
Gga.10496.1.S1_at	ENSGALG00000005074	9	1	25	20949	20973	TGGCTTAAAAGCAGAGTTCACACAG	1e-05	47.3	100		ENSGALG00000018386	1		ENSGALG00000003935	1		ENSGALG00000011630	1		ENSGALG00000009237
Gga.10496.1.S1_x_at	ENSGALG00000005074	10	1	25	20950	20974	GGCTTAAAAGCAGAGTTCACACAGA	1e-05	47.3	100		ENSGALG00000008135	1		ENSGALG00000016803	1		ENSGALG00000011515	1		ENSGALG00000015128
Gga.10497.1.S1_at	ENSGALG00000011082	1	1	19	153634	153616	TCTGTCAAGCCACTCTGCA	0.023	36.2	100		ENSGALG00000004058	1		ENSGALG00000001093	2		ENSGALG00000006951	1		ENSGALG00000010588
Gga.10501.2.A1_at	ENSGALG00000002458	10	1	25	49928	49904	GAAGTAACCCGAATTCTCTGATGTT	1e-05	47.3	100		ENSGALG00000019589	1		ENSGALG00000010893	1		ENSGALG00000016937	1		ENSGALG00000012511
Gga.10503.1.S1_at	ENSGALG00000014250	11	1	25	235	259	GCAGCAGGTAAGGACCTCCGGCTTT	1e-05	47.3	100		ENSGALG00000010768	1		ENSGALG00000014936	1		ENSGALG00000002719	1		ENSGALG00000022557
Gga.10505.1.S1_at	ENSGALG00000012540	11	1	25	44589	44613	TAAGTCCTGTTTCTGCACTCGCTTC	1e-05	47.3	100		ENSGALG00000027483	1		ENSGALG00000025776	2		ENSGALG00000001536	1		ENSGALG00000021429
Gga.10506.1.A1_at	ENSGALG00000012207	11	1	25	17213	17189	AGAAATCTGCCCACTAGAGAACCAC	1e-05	47.3	100		ENSGALG00000015775	2		ENSGALG00000003812	3		ENSGALG00000007142	1		ENSGALG00000009432
Gga.10506.1.S1_at	ENSGALG00000012207	11	1	25	17055	17079	GTGTTGATTTCTTGATGACTGCAGT	1e-05	47.3	100		ENSGALG00000013642	1		ENSGALG00000002837	2		ENSGALG00000016079	1		ENSGALG00000014567
Gga.10507.1.S1_at	ENSGALG00000016078	1	6	23	141365	141348	AATGTCCCTTTGTGTGCG	0.081	34.4	100		ENSGALG00000000620	1		ENSGALG00000014682	4		ENSGALG00000005347	1		ENSGALG00000028598
Gga.10508.1.A1_at	ENSGALG00000018439	2	1	25	42	18	GAACCTCCTGTTCAGAGCCTGCAGC	1e-05	47.3	100		ENSGALG00000013985	3		ENSGALG00000013987	3		ENSGALG00000010940	1		ENSGALG00000002505
Gga.10508.1.S1_at	ENSGALG00000004902	2	6	22	27515	27531	TGCTGTTCTCTCGCTGC	0.29	32.5	100		ENSGALG00000027206	1		ENSGALG00000008405	2		ENSGALG00000011794	1		ENSGALG00000009067
Gga.1051.1.A1_at	ENSGALG00000004754	1	1	20	19248	19229	TTGGAGCAAAGCCTGACCTG	0.006	38.1	100		ENSGALG00000004881	2		ENSGALG00000002119	1		ENSGALG00000001791	1		ENSGALG00000011855
Gga.10510.1.S1_at	ENSGALG00000016175	8	1	25	5519	5543	AGAGGAGGAGCCCTCTTCACTTGCT	1e-05	47.3	100		ENSGALG00000017248	2		ENSGALG00000022956	1		ENSGALG00000012882	1		ENSGALG00000000982
Gga.10511.1.A1_at	ENSGALG00000008229	2	1	25	6292	6268	GTTTGCCTAGATGATCTCTGACCAG	1e-05	47.3	100		ENSGALG00000012909	1		ENSGALG00000002319	1		ENSGALG00000014106	1		ENSGALG00000005092
Gga.10511.1.S1_at	ENSGALG00000009480	2	3	25	16863	16885	GAGGATAGCCAGTGTCACTCCAG	0.0001	43.6	100		ENSGALG00000016454	1		ENSGALG00000013461	5		ENSGALG00000026033	1		ENSGALG00000028487
Gga.10512.1.A1_at	ENSGALG00000027870	1	4	23	395	414	TATTCAGTGTTGAGATGTTC	0.006	38.1	100		ENSGALG00000007334	1		ENSGALG00000003251	2		ENSGALG00000010812	1		ENSGALG00000001483
Gga.10512.1.S1_at	ENSGALG00000008414	1	2	20	5067	5049	AGGCAGTGCCCAAAGCAAA	0.023	36.2	100		ENSGALG00000003437	2		ENSGALG00000000427	2		ENSGALG00000014067	1		ENSGALG00000002590
Gga.10513.1.S1_at	ENSGALG00000007525	11	1	25	1108	1132	GTGCTCCTGGCTGCTGGTAGCACAG	1e-05	47.3	100		ENSGALG00000002922	4		ENSGALG00000005150	1		ENSGALG00000013000	1		ENSGALG00000005266
Gga.10514.1.S1_at	ENSGALG00000012321	11	1	25	32306	32330	GAGACTTTGCAGGTACTGTACTTCT	1e-05	47.3	100		ENSGALG00000004783	2		ENSGALG00000015424	1		ENSGALG00000004687	1		ENSGALG00000021810
Gga.10516.1.S1_at	ENSGALG00000009387	11	1	25	40975	40999	TGATGCTGAAACTTTACCCGAGGGC	1e-05	47.3	100		ENSGALG00000011038	1		ENSGALG00000015758	2		ENSGALG00000003627	1		ENSGALG00000016558
Gga.10517.1.A1_at	ENSGALG00000007593	2	2	25	13036	13059	AGCTGTGTGAGTCATCCCAGCACA	0.002	39.9	95.83		ENSGALG00000008143	3		ENSGALG00000012000	1		ENSGALG00000023172	1		ENSGALG00000017045
Gga.10517.1.S1_at	ENSGALG00000012153	5	1	25	6550	6526	CATGGTTTTATGACTTTTGGTTATC	1e-05	47.3	100		ENSGALG00000006951	1		ENSGALG00000016861	1		ENSGALG00000004387	1		ENSGALG00000000706
Gga.10519.1.A1_at	ENSGALG00000005776	11	1	25	5401	5425	ATGGCAGTGATACTCCAGGCTGTTT	1e-05	47.3	100		ENSGALG00000011515	1		ENSGALG00000006777	2		ENSGALG00000027058	1		ENSGALG00000000386
Gga.10519.1.S1_at	ENSGALG00000005776	11	1	25	3825	3801	GAAAACAATTCATTCTATGCTCAGA	1e-05	47.3	100		ENSGALG00000002719	2		ENSGALG00000027471	3		ENSGALG00000002862	1		ENSGALG00000023393
Gga.10520.1.S1_at	ENSGALG00000007886	10	1	25	44095	44071	AAGTCCCTCATTTGATTTTGGTTCT	1e-05	47.3	100		ENSGALG00000016937	2		ENSGALG00000010881	2		ENSGALG00000001851	1		ENSGALG00000026303
Gga.10522.1.A1_at	ENSGALG00000003758	10	1	25	3085	3061	ATGAGCCCAGAGCACGTTGAGATCT	1e-05	47.3	100		ENSGALG00000016124	1		ENSGALG00000023497	1		ENSGALG00000007365	1		ENSGALG00000011571
Gga.10522.1.S1_at	ENSGALG00000003758	11	1	25	2727	2751	ACAAGGCCAAGATTGTCCCGAGCCA	1e-05	47.3	100		ENSGALG00000016079	1		ENSGALG00000028422	11		ENSGALG00000004428	1		ENSGALG00000023828
Gga.10523.1.S1_at	ENSGALG00000014935	10	1	25	31045	31069	GATTCTTCAGTGTTCAGTCCAGCAA	1e-05	47.3	100		ENSGALG00000026038	1		ENSGALG00000006757	1		ENSGALG00000015287	1		ENSGALG00000012369
Gga.10526.1.S1_at	ENSGALG00000002266	1	1	18	12686	12703	ATTGCAGCACAGTCCTTT	0.081	34.4	100		ENSGALG00000002167	1		ENSGALG00000006188	2		ENSGALG00000029077	1		ENSGALG00000009593
Gga.10528.2.A1_at	ENSGALG00000007785	11	1	25	1752	1728	TATACAAGAAGTCAGGCAGCCCATT	1e-05	47.3	100		ENSGALG00000011794	2		ENSGALG00000012405	1		ENSGALG00000027565	1		ENSGALG00000028081
Gga.10529.1.S1_at	ENSGALG00000028014	21	1	25	24066	24042	AACAGTAGCACGCTGGGTTGCCTAT	1e-05	47.3	100		ENSGALG00000001791	2		ENSGALG00000007167	1		ENSGALG00000025817	1		ENSGALG00000012142
Gga.10530.1.A1_at	ENSGALG00000006264	11	1	25	132056	132032	AAATCCAGCAACCATCCATTACATT	1e-05	47.3	100		ENSGALG00000010812	1		ENSGALG00000009079	3		ENSGALG00000013244	1		ENSGALG00000026222
Gga.10530.1.S1_at	ENSGALG00000006264	11	1	25	131877	131901	ACTGCTGAGGGCTTCGGCTGTTAAG	1e-05	47.3	100		ENSGALG00000014067	2		ENSGALG00000015828	2		ENSGALG00000010106	1		ENSGALG00000027686
Gga.10532.1.S1_at	ENSGALG00000003800	4	1	25	6537	6561	ACACACAAGGTTCTCCTGGCCCAAG	1e-05	47.3	100		ENSGALG00000013000	2		ENSGALG00000009304	2		ENSGALG00000000583	1		ENSGALG00000023692
Gga.10534.1.S1_at	ENSGALG00000021314	11	1	25	20603	20579	AAAGGGCAAGCCCTTTCTCTAGCAT	1e-05	47.3	100		ENSGALG00000006101	1		ENSGALG00000025924	1		ENSGALG00000000062	1		ENSGALG00000024335
Gga.10536.1.A1_at	ENSGALG00000015002	1	8	25	13044	13061	GTGCAGCCATGGTCACCA	0.081	34.4	100		ENSGALG00000015683	1		ENSGALG00000016554	1		ENSGALG00000010180	1		ENSGALG00000028242
Gga.10536.1.S1_at	ENSGALG00000016292	1	7	23	44895	44911	GGCAACCAGCTGCTGAT	0.29	32.5	100		ENSGALG00000013552	4		ENSGALG00000010391	2		ENSGALG00000003579	1		ENSGALG00000005360
Gga.10537.1.S1_at	ENSGALG00000008401	11	1	25	4630	4654	TCTGCAATCCACAGGCTGCTTAGTG	1e-05	47.3	100		ENSGALG00000004687	1		ENSGALG00000011120	4		ENSGALG00000009034	1		ENSGALG00000026471
Gga.1054.1.S1_at	ENSGALG00000012211	1	3	20	109904	109921	ATTTCATCCCGAAGCTGT	0.081	34.4	100		ENSGALG00000000518	2		ENSGALG00000010536	3		ENSGALG00000028304	1		ENSGALG00000010848
Gga.10540.1.A1_at	ENSGALG00000011894	11	1	25	1339	1315	AAAGCCCATGGCTGATCTGCTGCAA	1e-05	47.3	100		ENSGALG00000002026	1		ENSGALG00000009747	1		ENSGALG00000009579	1		ENSGALG00000028778
Gga.10540.1.S1_at	ENSGALG00000011894	11	1	25	1089	1113	AGGTGAGTAGTGGACCCTGCCAACA	1e-05	47.3	100		ENSGALG00000015810	1		ENSGALG00000013124	11		ENSGALG00000010325	1		ENSGALG00000012061
Gga.10542.1.S1_at	ENSGALG00000012009	11	1	25	2534	2558	GAAAATCTTGTAACCATGAGCATAA	1e-05	47.3	100		ENSGALG00000000901	2		ENSGALG00000004280	2		ENSGALG00000009082	1		ENSGALG00000005205
Gga.10543.1.S1_at	ENSGALG00000005508	11	1	25	23247	23271	GGGCAGCGAGGAGCTTGTTAACATC	1e-05	47.3	100		ENSGALG00000008462	2		ENSGALG00000014689	2		ENSGALG00000006766	1		ENSGALG00000000804
Gga.10544.1.S1_at	ENSGALG00000015768	8	1	25	163	187	ATAACTCCTAAACCATTGTCTGTAA	1e-05	47.3	100		ENSGALG00000012166	2		ENSGALG00000026957	2		ENSGALG00000003440	1		ENSGALG00000026245
Gga.10545.1.S1_at	ENSGALG00000002192	11	1	25	31478	31502	CAGTAGTATCGTAACTCCAGTGAGT	1e-05	47.3	100		ENSGALG00000012872	1		ENSGALG00000012341	1		ENSGALG00000006906	1		ENSGALG00000020939
Gga.10546.1.S1_at	ENSGALG00000014030	10	1	25	14645	14669	TGATACACGTGTTGATCTCTTGAAC	1e-05	47.3	100		ENSGALG00000001851	2		ENSGALG00000008602	1		ENSGALG00000014178	1		ENSGALG00000008784
Gga.10548.1.S1_at	ENSGALG00000014720	9	1	25	3774	3798	GATTGATGTCGTTTACATGTATCCC	1e-05	47.3	100		ENSGALG00000007365	1		ENSGALG00000003861	1		ENSGALG00000004670	1		ENSGALG00000003604
Gga.10550.1.S1_at	ENSGALG00000020292	11	1	25	11787	11811	GGTGCGTTTATAACAGCTCCACAAA	1e-05	47.3	100		ENSGALG00000023866	3		ENSGALG00000028086	1		ENSGALG00000027947	1		ENSGALG00000023724
Gga.10551.1.S1_at	ENSGALG00000005524	1	2	19	13829	13846	CAATGCTGTGTGCCCAGT	0.081	34.4	100		ENSGALG00000015920	1		ENSGALG00000002457	3		ENSGALG00000013657	1		ENSGALG00000016203
Gga.10552.1.S1_at	ENSGALG00000005791	1	2	25	22835	22812	GATGAAGCTGGG-AGCCACCTGCCT	0.081	34.4	92		ENSGALG00000015287	1		ENSGALG00000004613	1		ENSGALG00000007599	1		ENSGALG00000013865
Gga.10553.1.S1_at	ENSGALG00000013372	11	1	25	128	152	GCAGCATGCTCAGAATGACACGGAT	1e-05	47.3	100		ENSGALG00000029077	1		ENSGALG00000014349	5		ENSGALG00000009013	1		ENSGALG00000005195
Gga.10554.1.A1_at	ENSGALG00000010344	12	1	25	1436	1412	GAGATATTCCACATCCTGATCAAGA	1e-05	47.3	100		ENSGALG00000027565	2		ENSGALG00000001099	2		ENSGALG00000013579	1		ENSGALG00000007196
Gga.10554.1.S1_at	ENSGALG00000010344	11	1	25	1061	1085	GGAGATGTTCTGTGGCCTTGTTAGC	1e-05	47.3	100		ENSGALG00000025817	2		ENSGALG00000009048	2		ENSGALG00000003293	1		ENSGALG00000005655
Gga.10555.1.A1_at	ENSGALG00000007651	11	1	25	8124	8148	GTCCAAAAACCCGTTCATATGCCTT	1e-05	47.3	100		ENSGALG00000012218	1		ENSGALG00000002199	1		ENSGALG00000013605	1		ENSGALG00000025721
Gga.10555.1.S1_at	ENSGALG00000007651	11	1	25	7167	7143	ACATGTGGCATATCTGACAGGTCTG	1e-05	47.3	100		ENSGALG00000013244	2		ENSGALG00000014890	1		ENSGALG00000016426	1		ENSGALG00000029009
Gga.10556.1.S1_at	ENSGALG00000016289	1	2	20	166277	166259	TAACTGATCAACTTTTTCT	0.023	36.2	100		ENSGALG00000028683	1		ENSGALG00000008659	1		ENSGALG00000011084	1		ENSGALG00000011111
Gga.10557.1.A1_at	ENSGALG00000021882	11	1	25	50456	50432	TAAATGCTCCACTTCATCCATGACA	1e-05	47.3	100		ENSGALG00000000062	4		ENSGALG00000011148	2		ENSGALG00000017173	1		ENSGALG00000013174
Gga.10558.1.S1_at	ENSGALG00000026747	11	1	25	1790	1766	TCAGAACTAGACTCAACTCCAGCAT	1e-05	47.3	100		ENSGALG00000000583	2		ENSGALG00000008527	2		ENSGALG00000015443	1		ENSGALG00000011433
Gga.10560.1.S1_at	ENSGALG00000007647	11	1	25	5425	5449	GTTTATCTCAGCTCTTCGAAAAAAT	1e-05	47.3	100		ENSGALG00000009034	1		ENSGALG00000001419	7		ENSGALG00000027503	1		ENSGALG00000009209
Gga.10562.1.S1_at	ENSGALG00000008070	11	1	25	3970	3994	GAGCACTTTTTCATTCTAACACAAC	1e-05	47.3	100		ENSGALG00000004736	1		ENSGALG00000008018	1		ENSGALG00000009415	1		ENSGALG00000001713
Gga.10563.1.S1_at	ENSGALG00000017272	1	1	22	64027	64006	CAAAGTGGAACTCATGGGCTGA	0.023	36.2	95.45		ENSGALG00000011219	1		ENSGALG00000015001	1		ENSGALG00000027627	1		ENSGALG00000009788
Gga.10563.2.A1_at	ENSGALG00000002749	1	2	25	13249	13226	CCCCATCCTTGTGTGCACAGCTGT	0.002	39.9	95.83		ENSGALG00000006428	1		ENSGALG00000002699	2		ENSGALG00000003618	1		ENSGALG00000009802
Gga.10563.2.S1_a_at	ENSGALG00000012857	2	1	22	9229	9207	GACTGGCCTTGATGA-CTCTGAG	0.023	36.2	95.65		ENSGALG00000007684	1		ENSGALG00000010826	1		ENSGALG00000016492	1		ENSGALG00000006305
Gga.10564.1.S1_at	ENSGALG00000016341	11	1	25	11983	12007	GATTCAGTTTTATGTCGTGACTTTC	1e-05	47.3	100		ENSGALG00000009082	1		ENSGALG00000015479	9		ENSGALG00000016791	1		ENSGALG00000029141
Gga.10565.1.S1_at	ENSGALG00000016370	11	1	25	6924	6948	AGTTGTACTATCTTTGCTTATTTTT	1e-05	47.3	100		ENSGALG00000008087	1		ENSGALG00000001346	1		ENSGALG00000009523	1		ENSGALG00000027546
Gga.10566.1.S1_at	ENSGALG00000009640	4	1	25	183	159	GAGCTGACTGTTAACCTTGAAGGAT	1e-05	47.3	100		ENSGALG00000014083	1		ENSGALG00000026546	2		ENSGALG00000005074	1		ENSGALG00000008663
Gga.10567.1.S1_at	ENSGALG00000001905	11	1	25	5950	5974	TTCAGAGTCCTTTGGCATTACCTTT	1e-05	47.3	100		ENSGALG00000006906	2		ENSGALG00000012364	1		ENSGALG00000009796	1		ENSGALG00000000199
Gga.10568.1.A1_at	ENSGALG00000024014	1	1	18	1547	1564	GTGCCGTTCCTGCTGGGT	0.081	34.4	100		ENSGALG00000014178	1		ENSGALG00000010114	1		ENSGALG00000014707	1		ENSGALG00000026481
Gga.10568.1.S1_at	ENSGALG00000002450	1	7	25	3184	3166	TGAGGCTCTGCTCTGCTGC	0.023	36.2	100		ENSGALG00000002262	1		ENSGALG00000016702	3		ENSGALG00000009537	1		ENSGALG00000027539
Gga.10569.1.S1_at	ENSGALG00000008555	11	1	25	23318	23342	ATACTCTTATAGCAAAGCCTCCCTG	1e-05	47.3	100		ENSGALG00000027947	2		ENSGALG00000008425	3		ENSGALG00000004967	1		ENSGALG00000000870
Gga.1057.1.S1_at	ENSGALG00000005653	7	1	25	4566	4590	GAGCAGCTGCTGAATCAGGACGGCA	1e-05	47.3	100		ENSGALG00000015189	1		ENSGALG00000008135	6		ENSGALG00000023069	1		ENSGALG00000006516
Gga.10570.1.S1_at	ENSGALG00000016203	4	1	25	76149	76173	AACTCAAGACATAAGGCGCCTTCGG	1e-05	47.3	100		ENSGALG00000007599	2		ENSGALG00000000620	1		ENSGALG00000000187	1		ENSGALG00000005123
Gga.10572.1.S1_at	ENSGALG00000008918	11	1	25	2163	2187	TCCCATCGGCTCTCTGCCTTGGTTA	1e-05	47.3	100		ENSGALG00000016426	4		ENSGALG00000014218	2		ENSGALG00000007271	1		ENSGALG00000013705
Gga.10573.1.A1_at	ENSGALG00000004638	10	1	25	170	146	AGGCTACGTGTGATGCTTTGGTTGC	1e-05	47.3	100		ENSGALG00000000239	1		ENSGALG00000009219	2		ENSGALG00000001505	1		ENSGALG00000022875
Gga.10573.1.S1_at	ENSGALG00000004638	11	1	25	930	954	GAGATGCCAAATAAGCTCAGTTTCT	1e-05	47.3	100		ENSGALG00000000149	2		ENSGALG00000013985	4		ENSGALG00000011664	1		ENSGALG00000022619
Gga.10574.1.A1_at	ENSGALG00000002892	11	1	25	18186	18162	TTTCTCGTTCTTAAGCACTCTGTAC	1e-05	47.3	100		ENSGALG00000010681	1		ENSGALG00000011639	2		ENSGALG00000000291	1		ENSGALG00000008755
Gga.10574.1.S1_at	ENSGALG00000002892	10	1	25	18211	18235	TTGCTTTGCATTATTTCCCCTTCAT	1e-05	47.3	100		ENSGALG00000015443	1		ENSGALG00000002535	2		ENSGALG00000028265	1		ENSGALG00000025781
Gga.10575.1.S1_at	ENSGALG00000007920	11	1	25	18619	18643	GAAGCAAAGCTCTTGGTGATGGCAA	1e-05	47.3	100		ENSGALG00000015555	2		ENSGALG00000023032	3		ENSGALG00000013414	1		ENSGALG00000010831
Gga.10578.1.S1_at	ENSGALG00000010577	11	1	25	6450	6426	GAGGCACTGAAGTAGTCCTGCACCC	1e-05	47.3	100		ENSGALG00000009415	4		ENSGALG00000003454	2		ENSGALG00000027231	1		ENSGALG00000011295
Gga.10579.1.S1_at	ENSGALG00000013024	5	1	25	16987	17011	CGGGCGAGGAAAGTGCAGCCACTAT	1e-05	47.3	100		ENSGALG00000027627	3		ENSGALG00000024122	2		ENSGALG00000026846	1		ENSGALG00000028401
Gga.10580.1.S1_at	ENSGALG00000012739	1	4	25	85705	85726	AAACCAATACACCTGCTGCAAA	0.023	36.2	95.45		ENSGALG00000003618	1		ENSGALG00000010183	1		ENSGALG00000012712	1		ENSGALG00000023353
Gga.10581.1.S1_s_at	ENSGALG00000006851	1	4	21	271933	271916	AAGGTGTGACTTGCTTGA	0.081	34.4	100		ENSGALG00000016492	1		ENSGALG00000009421	1		ENSGALG00000020253	1		ENSGALG00000027391
Gga.10582.1.A1_at	ENSGALG00000017213	10	1	25	8533	8509	GCCAGGACAGGGACACCTTCTAATA	1e-05	47.3	100		ENSGALG00000009796	2		ENSGALG00000002980	3		ENSGALG00000014079	1		ENSGALG00000004837
Gga.10582.1.S1_at	ENSGALG00000017213	11	1	25	8337	8361	CTCTGGCTGCATAAAGTACGTACAG	1e-05	47.3	100		ENSGALG00000005074	5		ENSGALG00000016454	1		ENSGALG00000011236	1		ENSGALG00000025899
Gga.10583.2.S1_a_at	ENSGALG00000008546	1	2	19	72258	72275	AAATAACACACAAAGCCC	0.081	34.4	100		ENSGALG00000009537	1		ENSGALG00000007334	4		ENSGALG00000014764	1		ENSGALG00000028666
Gga.10584.1.S1_at	ENSGALG00000004413	9	1	25	9549	9573	AGAGGTTTAATTTGCAGAGCTGCCA	1e-05	47.3	100		ENSGALG00000004967	2		ENSGALG00000027408	2		ENSGALG00000017041	1		ENSGALG00000016664
Gga.10585.1.A1_at	ENSGALG00000008653	11	1	25	429	405	GGCATCCAGACCTGTAATCCAGTAT	1e-05	47.3	100		ENSGALG00000011454	2		ENSGALG00000006106	1		ENSGALG00000011660	1		ENSGALG00000014136
Gga.10585.1.S1_at	ENSGALG00000008653	9	1	25	7	31	GAATACATGCAGATGATTATCAGAA	1e-05	47.3	100		ENSGALG00000005269	3		ENSGALG00000002922	9		ENSGALG00000010607	1		ENSGALG00000017023
Gga.10586.1.A1_at	ENSGALG00000006698	11	1	25	1501	1477	ACACAGTATTACCAGGAGGAATCCA	1e-05	47.3	100		ENSGALG00000001505	2		ENSGALG00000027830	2		ENSGALG00000014943	1		ENSGALG00000007697
Gga.10586.1.S1_at	ENSGALG00000006698	11	1	25	1276	1300	TAACTACTGTGAGATCTTTTCCCTT	1e-05	47.3	100		ENSGALG00000011664	1		ENSGALG00000029130	2		ENSGALG00000016226	1		ENSGALG00000008901
Gga.10587.1.S1_at	ENSGALG00000028737	11	1	25	968	944	AAATGCAGCTCTTGGTGCTGGGATC	1e-05	47.3	100		ENSGALG00000000291	2		ENSGALG00000004783	2		ENSGALG00000009384	1		ENSGALG00000028135
Gga.10589.1.S1_at	ENSGALG00000008802	11	1	25	2054	2030	AATACTGACTAAACACCGGTGAACT	1e-05	47.3	100		ENSGALG00000025801	1		ENSGALG00000005858	1		ENSGALG00000006784	1		ENSGALG00000005310
Gga.10592.1.A1_at	ENSGALG00000020768	6	1	25	57	81	TACGGCTGGCAAAAGGCTCTCGAAT	1e-05	47.3	100		ENSGALG00000028265	1		ENSGALG00000005685	3		ENSGALG00000001203	1		ENSGALG00000009854
Gga.10592.1.S1_at	ENSGALG00000020768	3	1	25	104	80	GCATTTCCAGCTGAGTCTGACAAAT	1e-05	47.3	100		ENSGALG00000016881	2		ENSGALG00000000979	1		ENSGALG00000007307	1		ENSGALG00000028479
Gga.10598.1.S1_at	ENSGALG00000003336	11	1	25	14050	14074	TTGTCTGGTTGCTCTCTTTCAAAAT	1e-05	47.3	100		ENSGALG00000028499	2		ENSGALG00000025869	4		ENSGALG00000000753	1		ENSGALG00000023521
Gga.10598.1.S1_s_at	ENSGALG00000003336	11	1	25	13892	13916	GTTTGGAGAAAATGGCACACTCTTG	1e-05	47.3	100		ENSGALG00000000437	1		ENSGALG00000011515	1		ENSGALG00000004352	1		ENSGALG00000003636
Gga.10598.2.S1_at	ENSGALG00000010103	1	4	25	46937	46959	TGATT-TGCTTTCTACAGTAAAG	0.023	36.2	95.65		ENSGALG00000020253	1		ENSGALG00000011630	4		ENSGALG00000006705	1		ENSGALG00000010954
Gga.10599.1.A1_at	ENSGALG00000026366	11	1	25	19070	19046	GTTGCCTATATCACATCCCTGTTCT	1e-05	47.3	100		ENSGALG00000011236	1		ENSGALG00000006951	1		ENSGALG00000026250	1		ENSGALG00000021842
Gga.10599.1.S1_at	ENSGALG00000026366	11	1	25	18684	18708	AGGCAGGGAGACACGGTTCAACTTG	1e-05	47.3	100		ENSGALG00000015280	3		ENSGALG00000016937	7		ENSGALG00000028702	1		ENSGALG00000003169
Gga.106.1.A1_at	ENSGALG00000011875	7	1	25	31906	31882	TTTTCCATCATCAAAATAGGATAAC	0.0005	41.7	96		ENSGALG00000014764	1		ENSGALG00000002719	3		ENSGALG00000027737	1		ENSGALG00000012005
Gga.106.1.S1_at	ENSGALG00000011875	8	1	25	31858	31882	GAAGTTTGCTCGTTCAAAACTTTGG	0.0005	41.7	96		ENSGALG00000019836	2		ENSGALG00000007142	1		ENSGALG00000012870	1		ENSGALG00000013688
Gga.10603.1.A1_at	ENSGALG00000003297	11	1	25	6187	6163	AACGGAGCCTCCAGCAGAGAGCTGA	1e-05	47.3	100		ENSGALG00000017041	3		ENSGALG00000001536	2		ENSGALG00000012505	1		ENSGALG00000016175
Gga.10603.1.S1_at	ENSGALG00000003297	11	1	25	5753	5777	AATGTGAGGGCCTGTGCTGTACTGT	1e-05	47.3	100		ENSGALG00000004155	1		ENSGALG00000016079	7		ENSGALG00000016044	1		ENSGALG00000003046
Gga.10604.1.S1_at	ENSGALG00000010772	11	1	25	159501	159525	GCACGGGAATGCTTAGAATCCTCCT	1e-05	47.3	100		ENSGALG00000028898	2		ENSGALG00000026188	1		ENSGALG00000016783	1		ENSGALG00000026720
Gga.10605.1.A1_at	ENSGALG00000016198	5	1	25	4642	4618	GAAATCACGTTCTGCATTCTGAATT	1e-05	47.3	100		ENSGALG00000005544	3		ENSGALG00000005347	3		ENSGALG00000004197	1		ENSGALG00000004898
Gga.10605.1.S1_at	ENSGALG00000016198	10	1	25	4519	4543	ATAATGTTGGCTTCTGAGCTGCTGA	1e-05	47.3	100		ENSGALG00000011660	1		ENSGALG00000010940	2		ENSGALG00000004435	1		ENSGALG00000004637
Gga.10607.1.A1_at	ENSGALG00000012336	1	1	20	56484	56465	GATCTCTGTTCAGATCTTCT	0.006	38.1	100		ENSGALG00000014943	2		ENSGALG00000011794	2		ENSGALG00000015624	1		ENSGALG00000028483
Gga.10607.1.S1_at	ENSGALG00000008682	1	1	22	11646	11625	GATGCTTCATTTGCTGCTGTTT	0.023	36.2	95.45		ENSGALG00000000820	1		ENSGALG00000026503	1		ENSGALG00000012740	1		ENSGALG00000025851
Gga.10608.1.A1_at	ENSGALG00000017271	7	1	25	125621	125597	TGCCTTATCCCAACGAGCAATGGTC	1e-05	47.3	100		ENSGALG00000009384	1		ENSGALG00000012882	1		ENSGALG00000010258	1		ENSGALG00000028410
Gga.10608.1.S1_at	ENSGALG00000017271	6	1	25	126044	126068	TTTCGCAGGCAACCGTGATGTTCGT	1e-05	47.3	100		ENSGALG00000028982	1		ENSGALG00000014106	5		ENSGALG00000012589	1		ENSGALG00000012583
Gga.10609.1.S1_at	ENSGALG00000015746	10	1	25	29230	29206	GGGACCTTTAAATGCCAGTGGACTG	1e-05	47.3	100		ENSGALG00000014711	2		ENSGALG00000001791	1		ENSGALG00000013677	1		ENSGALG00000006045
Gga.10611.1.S1_at	ENSGALG00000008549	11	1	25	1620	1644	TACAGTCCTGCAATCATACTTAGAG	1e-05	47.3	100		ENSGALG00000003031	1		ENSGALG00000026033	1		ENSGALG00000002485	1		ENSGALG00000019917
Gga.10613.1.S1_at	ENSGALG00000004903	11	1	25	141	165	CAGCAGACACCAGGTTAGCATTCCT	1e-05	47.3	100		ENSGALG00000006784	1		ENSGALG00000014067	1		ENSGALG00000002639	1		ENSGALG00000008975
Gga.10614.1.A1_at	ENSGALG00000006385	11	1	25	14718	14694	GGATACCTTAGCATCAGCTGTGCCT	1e-05	47.3	100		ENSGALG00000006705	3		ENSGALG00000010812	4		ENSGALG00000013872	1		ENSGALG00000027820
Gga.10614.1.S1_at	ENSGALG00000006385	10	1	25	14396	14420	ATGCAGCCCTGGGAGATACTCTCAA	1e-05	47.3	100		ENSGALG00000026652	2		ENSGALG00000013000	2		ENSGALG00000010616	1		ENSGALG00000027175
Gga.1062.1.S1_at	ENSGALG00000013911	1	6	23	11143	11126	CAGACATAGTTAAGAGCT	0.081	34.4	100		ENSGALG00000027737	1		ENSGALG00000004687	3		ENSGALG00000010221	1		ENSGALG00000006720
Gga.10620.1.S1_at	ENSGALG00000012391	3	4	25	124601	124580	CAGGTCCGTGCAGTATAGAAAG	0.023	36.2	95.45		ENSGALG00000027097	1		ENSGALG00000003627	2		ENSGALG00000003741	1		ENSGALG00000010624
[truncated: 15,277 more rows]

## Sheet: NCBI-blast+ annotation(canine)
Probe_ID	Ensemble	Frequency	qsseq	qeseq	ssseq	sendseq	qseq	evalue	bitscore	%identity			All affy ensemble IDs			Genes from the new annotated probes			Common between 16602 vs 6869		Unique to the new annotated
[truncated: 16,603 more rows]

[truncated: 4 more sheets: Full annotaion , common , Orthologs mapping, orthologs for three species]
