# Supplementary material for: Inter-Species Host Gene Expression Differences in Response to Human and Avian Influenza A Virus Strains
Source: Int J Mol Sci. 2017 Nov 1;18(11):2295. doi: 10.3390/ijms18112295 (PMC5713265; doi:10.3390/ijms18112295)
Supplement: Supplementary file 1 [file ijms-18-02295-s001.zip › Supplementary Files/Table S2.xlsx]

## Sheet: Title
Table S2: list of metabolic genes from IAV siRNA screen and DEGs in this study.

## Sheet: List of siRNA data
List host factors required by IAV identified by siRNA screening studies
Brass et al., 2009	Karlas et al., 2010	Konig et al., 2010	Su et al., 2013	Sui et al., 2009	Tran et al., 2013	Bakre et al., 2013	Atkins et al., 2014	Shapira et al., 2009	Hao et al., 2008	Watanabe et al., 2014
250	286	297	110	99	91	19	5	204	95	322
RAB10	CYP17A1	CLOCK	ERCC4	CSNKID	COX7B2	EPHA6	CDK1	SUPT6H	RAB10	PRPF40A
PRPF31	MSRA	POLA1	DAPK2	RFNG	CLOCK	TPK1	STK3	RBBP6	PGD	TUBA1
GSK3A	FTS	STX10	MPG	NOTUM	ATF1	PDK2	STK24	UBC	ZBTB3	RPS17
KRTCAP2	DMAP1	KCNMA1	FSHB	COX5A	IFLTD1	C9ORF96	STK38	TFAP2A	RPS11	FARP1
IFIT5	BARHL2	LOC653712	RAD23A	RAD51L1	DSG4	EXOSC10	NEK1	RPS6KA4	HMGCR	ARHGEF10L
C6orf62	OPN1SW	SMARCD3	C6orf136	PLEC1	RPS25	NEK8		PIK3C2A	KRTCAP2	PSMA4
TCTEX1D2	TNFRSF18	NADK	C4orf35	SSH3	KIF24	PLK4		CLU	RPTOR	SKIP
MCF2L	LGALS2	ROCK1	BUB1	SPINT2	TAS2R16	SGK3		NXF1	RPS3A	PHF5A
RAB30	CKS1B	GABBR1	DDX3Y	TAPT1	C6ORF57	NEK3		ZMIZ1	CLUAP1	SIAHBP1
AQR	TCF3	ERN2	TPD52	FAM13B1	RNF19A	PANK4		ADAMTS1	VCP	GBF1
C11orf82	TBX21	SCN3A	SIPA1	SLC25A25	PQLC1	ITPKB		ZIC1	PSMB1	NCOA5
TPSAB1	ATP6AP2	CAPN6	HACE1	NDUFAF2	RPL23	CDC2L5		KIF2C	EIF3S3	BYSL
STK11IP	MST1R	ATP6AP2	MAML3	MRPL42	ITGAM	CDK3		IVNS1ABP	DCP2	HSPB1
C14orf166	FLJ20516	GSR	GJC1	ACAP2	NUP85	CALM2		PLA2G2F	BARHL2	SSRP1
NDUFB1	ABCC6	ENG	GPR151	PIK3C3	OR52A1	PRKAG3		GMEB1	ENSG00000174121	CCDC88C
CRADD	FLJ10458	NRBP1	Itch	MDN1	SP100	ERBB4		ZFYVE26	RPS16	BUB3
ZNF492	COPB2	PTMA	GIGYF2	KIDINS220	MERTK	ADK		TCF7L1	MRPL12	RPL26
ATP5F1	Cry2	COPB2	TXNDC16	MBOAT2	CFL1	PKN3		FBXW2	CNOT3	FAM73B
NDUFB11	APPBP1	TXNDC11	MAPK13	KIAA1107	BTC	HK2		UMPS	TDG	MAP1B
COPB2	POLR2L	NAGPA	FMO2	BTBD8	TNFSF9			LOC344593	RSHL3	PCDHB12
BUB3	SERPINB2	CHAF1A	YY2	CSK	PTPRJ			LOC442113	RPS9	PSMD1
UBE2A	PLAU	PIK3R4	SMOC1	PTBP1	APOBEC3G			PTPN11	SCD	C20orf114
COPA	TIMM44	BRWD3	C4BPA	MARK3	HPS4			HLA-A	WAC	MRPS28
C14orf109	DCAMKL2	EIF2AK2	ACOT2	ZFAND3	BPTF			FGFR2	DDAH1	KRT14
C5orf45	AP2M1	TPT1	RCVRN	ZFHX3	USP22			TBCD	HSPA5	KIAA0664
CALCOCO2	MPN	PSMD1	NMBR	PRKD3	SLC7A14			MYC	HAND2	NIBP
VPS54	KIAA0664	TRPV2	ATP6AP1	NDUFA7	POLD3			PHF3	ATP6AP1	DPM3
COPS6	FAU	SUMO1	UGT2B15	PEX5L	IL22			INCA1	RPS2	PPP6C
CNTN5	ATP6V0D1	NTRK1	SELPLG	PC	MED6			LOC285830	RNPS1	EEF2
SLC1A3	LARGE	ATP6V0D1	RAB5A	POLK	HSPA8			EIF2S2	RAB5A	COPB1
TSTA3	CNGB1	TOP1MT	ZSCAN16	RGS2	UBXN7			TCF20	EIF4A2	CCDC135
SLC41A3	AXIN1	LOC643641	WT1	GOLGA4	TMEM11			RPL13AP7	RPS20	DNAJC9
SELI	PDGFRL	DTX2	BPTF	LSM4	PLA1A			RPL13AP18	SEC61A2	PRDX3
NUTF2	XAB2	NTSR1	SNTB2	BPTF	USP8			RPL13A	RRBP1	CSRP1
CADM2	CA13	ROGDI	DLAT	GLCE	CCNJL			RPL13AP16	RPS18	PHB2
ETHE1	HIST1H2BN	CAMK2B	NEK3	PAPOLA	LRRC39			RPL13AP5	EIF3G	HSPCB
PRPF8	CNNM1	SIAH2	IVNS1ABP	CLNS1A	C17orf86			PRKCA	PSMB6	CBX3
RNH1	NUP98	NLGN4X	SPOCK2	ZNF7	SERPINA1			PELI1	IF1AH	LUC7L
CPLX1	AMN	AKAP13	ACVR1B	DENND1B	RIPK3			CXCL9	RPS10	TTN
LZTR1	TNC	MID1IP1	DOCK5	ARID1B	HCG1986447			NFKB1	CCT6A	DNAJC11
FCGR2A	LOC92235	FOXQ1	C11orf71	IQGAP1	TNRC6A			C21ORF33	HSPA8	U2AF2
CRNKL1	ARD1	UNCX	HRAS	SLC30A9	GULP1			NOD1	C20orf54	ITGB4BP
COPB1	DLG2	AATK	EED	FHIT	TMC6			CCRN4L	RAB1B	NCAPD3
ATP1A3	SIGLEC5	OXSR1	KIAA0174	RGNEF	MALT1			IL31RA	PSMC1	IGF2BP2
SPAG17	IL1A	CIT	GC	FAM13C1	CENPH			HECTD3	ANKS6	TUBB2A
ERLIN2	ITLN1	DSP	PTAFR	CIP29	NXF3			RBCK1	ATP6V0C	SERPINH1
TUFT1	HERC4	FGFR1	ATP6V0C	RFX3	ABCB10			LZTS2	ATP6V0D1	COPS7A
SF3B2	PAICS	LOC730974	YWHAH	FKBP5	MLLT11			KIAA1609	FAU	SF3A2
PLP1	IFNA7	CRHR1	SMARCE1	GRK6	NUP43			GRB2	TAF12	C16orf80
MOCS3	PLD2	NUP214	TAF4B	SOSTDC1	TH1L			USP46	PSMD6	RPN1
ATP8	RPS5	LOC441239	OR52M1	CRLS1	ZNF71			PGD	NUP153	PSMC4
PCGF6	CSEN	LIMS3	MAN2B2	REV3L	USP37			STARD5	MAT2A	PTPLAD1
NXF1	DBT	LOC728683	ATP6V0D1	NSW1	C1orf56			PSMB9	PPP1R15A	PSMB2
ZNF473	ATP6V1B2	RBCK1	C13orf28	LRRC16A	KIAA1751			CAMK2G	DPF2	CAPZA1
TBL1XR1	TFE3	AFF2	TRIM59	SUPT3H	C6ORF162			CSF2	RET	NOC4L
FUS	ASPA	F13A1	SIN3B	DPYD	ST8SIA3			OAS1	NXT2	NFIA
NUP98	ZNF512	MAP2K2	SAGE1	HEATR7A	TRIM16			COPA	NTSR1	VIM
NDUFB8	PSAP	SGK1	HIST1H1B	STIP1	SH3BP4			RASGRP2	ATP5B	KRT73
UBL5	BZRAP1	PTPRM	TAS2R40	HERC6	TNFSF13			IL33	NUP43	HSPA1B
CCDC74B	KCNK17	ATP6V1B2	RNF44	YLPM1	TMTC4			MAPK13	EIF5	SNRPC
ZNF653	ATP1A2	SYNGAP1	C1QL3	SEMA3A	RIOK3			STK38	COPG	PSMD13
RBM34	CRYAA	DIO1	TBC1D2B	SUZ12	USP16			ARMCX5	NXF1	TBC1D15
ITGA11	SLC12A4	ADRA1B	SLC7A4	PKD2L2	LOC339766			LSR	EIF3S5	PSMD8
ARCN1	CHST5	DUSP3	RRP1B	KIAA1033	PYY			PLCD3	NUP98	JAK1
COPZ1	C10orf57	CSMD3	PIK3C3	CLIP1	USP47			NFKBIE	PEPD	USP15
UBE2E1	C6orf33	PKD1	ZFP2	GON4L	FBXO15			KRAS	TIMM17A	NONO
C2orf69	G1P2	ITGA2B	ZNF397	DYRK1A	STARD5			LGALS9	PSMD11	LGALS3BP
LOC339524	PSMA1	WDR34	PCDH12	GNL3L	GAS2			TFAP2C	RPL13P12	DARS
ST8SIA1	MGC4238	FGFR2	DR1	PLCB1	ZNF251			IFIT5	CDC2	ATP5L
PVALB	BRPF1	BZRAP1	IPP	KDSR	EGFR			LMNA	EIF3S7	MAP1LC3B
AKAP11	ATP6AP1	C20orf111	SLC20A1	C4orf32	RLN1			ULBP1	ARCN1	TPM4
SRP54	CHUK	HECTD1	RNF24	SF3A3	IGF2BP1			ADCY7	RFX7	PRKAR1A
RPS4X	RAB6B	EPS8L3	RABGAP1	TASP1	CDH26			PTPRU	EIF3S8	ITGA3
SLU7	SNRP70	NUDCD3	EGFR	FBXL17	ITGAX			NFE2L1	AMMECR1	HSPA2
THRSP	PIK3R5	DCLK2	PSMD14	BACH1	PLEKHH1			TGFBR1	RPS4X	TUBAL3
SLC17A3	LARP	ITGA3	METAP1	DEDD2	TNFSF12			WASF1	RPL5	CYC1
SF3B1	ACACA	CSNK1G2	EOMES	COG5	LHX8			CYP2J2	RPS8	JTV1
SAMM50	TBL3	FNTB	ATP6V0B	ANKS1A	C21orf33			PRAF2	UQCRC2	BASP1
RPL13A	SKIIP	EPHA7	TMEM14A	DDX17	BAD			SVIL	LIN9	CHERP
DSC3	RPL35	MAP1LC3C	P2RY12	CHM	CMTM1			TMEM186	RPS15A	PSMA1
AMOTL1	LRP1B	USE1	HTR7	NDRG3	MX2			WDR37	ATP5C1	ITM2B
C1orf55	EPHB6	HIPK2	CLEC10A	PCMT1	CEBPG			DAAM1	HIST2H3C	ATP5O
NOSTRIN	RPS10	CFLAR	SMPD2	BMPR2	RBPJ			RNASE4	PLXNA2	HMGN2
GPKOW	CD47	AKT1	MAEA	UBR2	PLK4			NFKBIA	AAGAB	NME2
PHYHIP	CLIC4	NTRK2	DYRK1A	AKT1	C5orf38			ICAM1	PSMC3	CAND1
YTHDC1	CYP2U1	DUPD1	AXL	RPA1	AB12			RAB40B	RPS14	EIF4G3
CDK5RAP2	XPNPEP1	PTPMT1	DCLRE1C	WWP2	COX5B			RIOK3	RPS5	ASCC3L1
CPN2	MGC10433	CDC42BPB	KCNJ16	SLIRP	CHMP2A			EIF2AK3	EIF3S2	S100A4
PPARA	PRSS15	HAND2	ZCCHC14	OLA1	ARRDC3			CCL3	EIF2AK4	SNRP70
PIP4K2B	HSF4	JAK2	CDKN1A	DDX58	MED29			GPR56	EIF3S9	PLD3
FN3KRP	EIF3S10	ATP6AP1	ADAM11	C21orf33	LOC730139			TNFRSF10D	PSMD12	CIRBP
TCAP	TRIM60	TBK1	DPPA2	STXBP1				ZMAT4	COX6A1	SKIIP
ATP6V0E2	TNK2	GRK6	POLR2J2	VPS33A				JUNB	RPL15	MYH10
IQSEC1	MATN3	MAP2K5	XCR1	PLAU				LGALS3BP	PSMB3	RPS10
SH2D1A	IFNGR2	SNRP70	CD200R1L	BCL2				WASF3	PSMB4	BAT1
ONECUT2	TRIM21	UBXN10	INPP4A	N4BP2				HMGA2		TSC1
PIGH	PLK3	RPS20	RAB7A	NPNT				FAM35A		SQSTM1
SCYL3	C2orf32	MAPK1	THOC6	ADAM20				KLF6		SNRPD3
SAMD8	LASS4	PRPH2	LARP6	STAT3				CSNK1A1		CTBP1
EFTUD2	B2M	SUMO2	ATP6V1B2					ZNF512B		PRKACA
TBC1D23	ZNF37B	CTSG	TCF7L2					TLK1		GRP58
CACNB4	LPPR4	LRRK1	B3GAT1					TNIP3		SFRS2B
ZNF567	EIF3S5	TXK	NDUFB3					MTSS1		PPM1G
ZNF552	SF3B14	RPS10	MSH6					BUB3		SNRPA1
PCDHGA1	SF3A1	OR4M1	NCRNA00200					SMAD7		DNMT1
C11orf60	MDM2	PRKACA	MADD					NFIL3		RPL11
GCAT	COPE	SCN8A	PCDHA9					SMAD5		MRCL3
ABCD1	KATNB1	ANAPC2	RARS2					SORL1		GPS1
FAM13B	FBXW10	WDR18	PTGER2					KIAA0406		EIF3S10
CCDC78	NUDT4	GRK5	CAMK1					LPIN1		BIRC6
CWC22	BIRC1	SNRPA1						SPRY1		HIST1H2BG
HNRNPU	DAP3	SNRNP70						PIK3R3		AGK
SFXN2	PRPS1	GPR62						CALM3		NUP93
PIP	CTNNB1	NHP2L1						CALM2		SAMHD1
PGD	WNT9A	TNK2						CALM1		PPM1B
ERCC4	ATP6V1A	PLK3						ELK1		PEX19
ATF1	FHOD1	DLG5						TLR10		CCDC42
BACE1	P2RY12	PSENEN						MAP2K3		DHX8
TMEM187	RNF150	ADAMTSL4						SYNJ1		PSMD7
SART1	NUP205	FAM104B						ZKSCAN1		CAPRIN1
ESAM	LHX3	IL9R						SAV1		CAPNS1
MPG	NEK9	CABC1						TAOK3		ARFGEF2
CYB5R4	ACVR1C	SF3A1						LAMA5		SDF4
FLNC	OPRS1	MDM2						SLC1A3		SNRPB
USP6	NCK2	KSR2						PCF11		RBM10
FAM173A	CXCR6	IRAK3						PDGFA		CTNNB1
SLC35A1	PIK3C2G	C1orf159						PRKY		ICMT
CNOT10	CRSP2	ATP6V1A						MTHFD2		UCRC
RPS16	KIAA0652	PAK3						RSRC2		HNRNPK
PRCC	NPAS1	BCL3						TRIM27		FXR2
FAM38A	SULF2	ATP6V0B						IL15RA		KRT5
SLC2A2	RFFL	HIST3H3						POLD3		CDK2AP1
RAVER1	SNX9	BMPR1B						SCPEP1		MARS
PLCH2	PSMD2	RING1						SDC4		TNPO1
EIF2S1	AIG1	OPRS1						PCYOX1		NUP205
RPS6KL1	IK	CDKL5						CALCOCO2		C19orf43
EPRS	IL17R	SYCE2						IGFBP6		SFRS10
B4GALT2	PASD1	C2orf42						RTP4		ACTA1
LFNG	PIN1	VPS16						KIAA0226		LRPPRC
SULT1C4	SUPT6H	FOLH1						XBP1		TOMM40
RAB7L1	HSPD1	C14orf28						IRF8		SF3B4
ATP6AP1	STAB1	ROR2						PION		SAFB2
FRMD8	CDKN1B	FSCN1						APOA5		RPL23A
RAB5A	MYT1L	C5orf38						SLC7A1		BAG3
NUP88	NTHL1	SGCA						IL1F10		PSMC3
LRPAP1	B3GNT7	UBQLN4						MAGEA11		VGF
EIF4A2	CTGLF1	TNPO3						RXRG		EIF3S2
FREM2	GDF10	FLT3						CCNL1		THOC2
PIGT	FLJ11235	MINK1						TBC1D10B		TPI1
DMD	RETN	SAE1						RFTN1		IMPA2
PRRT1	FKBP9	AIG1						CYTH2		PSMD2
LSM2	LOC401431	ACRC						WNT5A		EIF3S9
SIGLEC9	SELPLG	NPY1R						RPS6KA5		PSMD12
HRK	BAIAP3	KIAA0999						NEU1		NUP160
ADAT1	RBM3	DAPK3						OSMR		SLC25A5
LRP1B	XPO1	CREB1						CLIC4		YWHAE
ZNF414	COPA	DAPK2						BHLHE40		HNRPA2B1
MPZL1	CLSTN3	SUMO4						MICAL2		RPL15
PDLIM3	KIF11	NFAT5						TRIM26		PRC1
MLKL	IGSF1	CDK4						TCEAL1		SRPK2
NT5C	PART1	PRKCI						DUSP5		NACA
SNRPD3	MED6	OSMR						RNF103		KIAA0406
DCLRE1B	MGC26885	TBC1D1						VPS24		KRT6B
SF3B3	IFNAR2	GAK						MFAP1		HSPD1
TGS1	SON	TRDMT1						TRIM22		HSGT1
WDR18	ATP6V0C	TUBB						C14ORF109		DNM1L
XIAP	KPNB1	SLC6A19						GPD2		LGALS3
PTS	TRAM1	ENTPD8						NLRP14		KCTD17
PCSK5	FLJ21865	MAP4K4						SNUPN		OSMR
BIRC8	PRPF8	FRAP1						FADS2		MRPL12
ATP6V1G1	RACGAP1	CBLL1						ALG6		SDF2L1
HIST1H1T	PIK3CB	COPA						NLRP10		NDUFS8
NHP2L1	ABCB10	ZNF436						ACP2		NDUFA8
CXorf59	SLC22A6	HTR2A						SHC1		HNRPM
FZD8	HEG	LTK						LIN37		TAF15
MYBL2	TXNL4A	CAD						SYK		HSPA5
CBX2	NXF1	SCNN1G						KBTBD4		TUBB
ZNF16	C21orf121	IGSF1						ITPKB		MCM5
TMEM62	HPGD	OR51T1						RNASEL		PPIB
SLC36A2	PPP1R14D	TEAD3						CLEC2B		PUS7
SPCS2	TRIM14	CSE1L						IL24		SNRPG
OLFM1	TRERF1	SLC48A1						FKBP5		XPO1
NOS3	NEK8	MARK2						ATF2		COPA
NAGA	USP42	HRAS						HLA-G		COMTD1
RUNX1	FLJ12436	APOA1						ACTN2		SDCCAG1
GDPD5	PAOX	STK31						ACSL4		CAD
C1orf222	GSTM4	ATP6V0C						FASN		GEMIN4
CLN5	ARCN1	KPNB1						IFIT2		PSMB6
COPG	USMG5	RACGAP1						CISH		ARS2
FBXO22	EIF3S8	ARAF						CACNA1A		NDUFA10
TRIM28	ZBTB2	NUP153						GOLGA3		TXNDC5
DHX8	SNX6	STX5						IRF2		PHB
PTBP1	COPB	COL2A1						EP300		SGTA
ATP5I	KCNJ12	HIPK3						DLX2		RPS12
ALG10	VNN2	DHCR7						IFNGR2		PRPF8
RBM14	ATCAY	PANK4						CYLD		PSMD6
NFXL1	DTX3	FGFR4						IRF1		PSMD3
C19orf29	SF3B1	G6PD						AMHR2		WDR77
NUPL1	FLJ23554	PPP1R14D						IRAK1		SIKE
AHCY	MYC	ANKRD7						EPHA4		CLPTM1
CARD16	RPS27A	DCLK1						PIK3CD		SF3B2
GINS2	RPS3	CTSW						NR4A1		RCN1
PTPRA	GTF2H3	TUBB3						IRF6		CLNS1A
CEACAM7	PHF2	ARCN1						PIK3R2		HSPA9B
ZNF432	CENTA1	CDC42BPA								XPOT
SNRPB	JUN	PPP1R12C								ZC3H15
PAGE5	E2F1	LIMK1								IARS
MYOCD	RPS14	KCNJ11								XRN2
ASAH1	APBB1IP	PDK3								SFRS9
DYNC1I1	BACH2	IL1F9								CTSD
INMT	PCDH18	PPIF								FUS
ZNF350	MGC16471	PRKAG2								PTRF
STARD5	SARS	OSBPL6								MYEF2
GJA3	PEN2	PHF2								PRPSAP1
CLK3	RPS24	NF1L2								PSMD11
ATP6V0B	PHGDHL1	JUN								PSME2
FOXE1	MAN2B1	NAGK								ARCN1
FHOD3	MAP2K3	KCNK12								AP2S1
TMEM167B	LOC284058	GOPC								NCKAP1L
MFAP1	MGC48998	PLK4								CNOT1
PTBS1	RPS16	SGK196								SYNCRIP
BUB1B	GGTL4	ACTC1								EDD1
NUP107	SNRPF	RAD54L								COPB
CHMP2B	SMU1	EPHB2								MRPS23
ANGPTL3	URP2	LOC440396								S100A1
C22orf15	EIF3S4	FAM135A								CCT8
HPSE	KIAA1411	TAOK1								PPA1
LY6G6C	SRRM2	GJA8								C18orf34
ZNF224	CHRM1	C16orf72								SF3B5
NDUFB9	CCNB3	MAP2K3								SND1
MBNL3	ANKK1	FLT4								GCN1L1
KIAA0652	GPR146	MAP3K11								GNB2L1
PPAN	GRIN2C	MAP3K12								SF3B1
C21orf82	SSTR5	PALM2								TESC
ZNF132	SFTPB	RP11								RPL3
TPRX1	CD81	UBXD3								UAP1
APBA3	FCHO2	PBK								ILF3
TRIM17	TRIB2	SMG1								STK38
EVC2	RANBP9	KCNJ3								RPS14
KIAA0391	FLJ25758	KLK9								SNRPA
PRSS8	CEL	RBM5								GPRASP2
B3GALT2	BAIAP2	PIP5K1C								SHROOM3
ZNF154	SERPINA1	GSK3B								PLOD3
MYO1E	GCLC	AQP4								EFTUD2
CCDC74A	LRP11	PCSK7								AYTL2
SNRPD2	C21orf7	HUNK								DDX3X
STAC3	CRAMP1L	G6PC3								DHX30
DCLRE1A	RUNX1	CD81								RPLP2
NDE1	NXF3	UBR4								CCDC56
MTFR1	TRAP1	RABEP1								ANP32B
	DDX48	FRK								MRPS31
	COPG	IKBKE								MAP2K3
	SLC9A3R1	MIB1								CASC3
	ATP2C1	CXorf21								HSP90AB1
	LRRN6A	PRKCD								E2F7
	MLYCD	PTS								VCP
	TK2	IL17RA								MRPS27
	PEPD	EPHB4								LACTB
	LOC283377	HIPK1								MRPL49
	PTPRN	OR10H4								ALDOA
	FBXW2	CACNG4								AP2A2
	EEF1A1	PCCB								RPL32
	CD58	KHSRP								FLJ20303
	PSMD14	ADAMTS2								C17orf85
	CD48	ANPEP								LASP1
	AHCYL1	RAB17								MRPS18B
	C14orf172	COPG								CYR61
	SSTK	TRIM28								RPL37
	STXBP4	PRSS35								PSMA5
	POLR2H	FBXO44								ATAD3A
	KNG1	PAK2								SLC16A1
	C19orf20	APP								PSMC1
	PSMC6	AGTRAP								SF3B3
	IRF2	PTPRN								IMMT
	ARTN	STK39								DHX15
	SAFB	VEGFB								RPL27A
	FGF19	CDK10								COBRA1
	LY6G6C	IL5RA								CLTC
	LOC92312	APC2								LRRC59
	GNRH2	CANT1								DKFZp564K142
	FKBP8	RPS6KA2								UNG
	DHRS2	ALPK2								BRD8
	SCNN1D	CD3EAP								MYL6
	MYOD1	ZNF862								DDX48
	CLK1	HSP90AA1								RANBP5
	DERL3	RAB11B								CAPZB
		ADRBK2								TRIM28
		DYRK1B								DDX21
		FPR1								POLE4
		NEK6								PRSS35
		CCRK								TARBP1
		FKBP8								CNIH4
		ACVR2A								KARS
		CCL13								NCLN
		RPL36AP49								RAN
		CLK1								EIF3S7
		ST6GALNAC6								ADSL
										KCTD5
										PSMD4
										SLC2A1
										EEF1G
										PSME1
										PSMD14
										GDI2
										AHNAK
										PSMC6
										ARMC6
										RGNEF
										PVR
										SF1
										MAD2L1
										INTS2
										ATRN
										CKAP4
										USP9X
										DNAJB11
										HEXIM1
										YWHAZ
										EEF1A2
										C14orf173
										DDX55
										RPS15

## Sheet: Genes involved in metabolic 
	up-regulated																			Down-regulated
Metabolic genes from the siRNA	M_10h_H1N1/WSN	M_10h_H9N2	M_10h H5N2/F118	M_10h H5N2/F59	M_10h H5N2/F189	M_10h H5N3	C_10h H1N1/WSN	C_10h H5N2/F118	C_10h H5N2/F59	C_10h H5N2/F189	C_10h H5N3	A_10h H1N1/WSN	A_10h H9N2	A_10h H5N2/F118	A_10h H5N2/F59	A_10h H5N2/F189	A_10h H5N3		Metabolic genes from siRNA	M_10h_H1N1/WSN	M_10h_H9N2	M_10h H5N2/F118	M_10h H5N2/F59	M_10h H5N2/F189	M_10h H5N3	C_10h H1N1/WSN	C_10h H5N2/F118	C_10h H5N2/F59	C_10h H5N2/F189	C_10h H5N3	A_10h H1N1/WSN	A_10h H9N2	A_10h H5N2/F118	A_10h H5N2/F59	A_10h H5N2/F189	A_10h H5N3
POLA1	CP	GCG	GCG	GCG	PRKAB1	DPM2	DSE					DCT			ATP6V1H	PPP3CA	SQLE		POLA1	POLA1		PFKFB3	B3GNT5	ATP6V1H	ACOT12		MTMR4				PFKFB3		AGPAT4	CHKA	NNT	PCK2
CYP17A1	GALNT18	TARSL2	ENPP6	ADCY2	PLCB1	L3HYPDH	GALNT14					ATP4B			SHC1	ATP6V1H	PNPT1		CYP17A1	HMGCR		POLA1	HMGCR	PFKFB3	MTHFD1		PIKFYVE				HMGCR		HMGCS1	PFKFB3	PLCE1	PSPH
HMGCR	DGKB		ARG2	GPD1	CDO1	ST8SIA5									GYS2	NT5C3A	PAICS		HMGCR	CALM3		B3GNT5	PFKL	B3GNT5			ACAA1				PFKL		FASN	HMGCR	CPS1	ACADSB
CALM3	ADCY3		PFKFB1	CDO1		POLA1									HK2	PAICS	XDH		CALM3	TRAF2		HMGCR	TARS	HMGCR			NMNAT2				TRAF2		SGSH	REV3L	PYGB	PLCE1
B3GNT7	AMY2B		GAD1	HPSE2		CA3									NME4	MOCS2	ACSL3		B3GNT7	PLCE1		TRAK2	PCCA	TRAF2			GUK1				CHST15		NEU3	POLR1E	DHRS3	BCAT1
NADK	CYP7B1		MGST1	TYR		CALM3									ACY1	NME4	LAP3		NADK	PCCA		ST3GAL5	GOT2	PSAT1							PLCE1		PYGB	PLCE1	SLC33A1	SARS
ROCK1			CDO1			CYP26B1									ST3GAL5	LAP3	GFPT2		ROCK1	B4GALT7		TARS	OXCT1	GCH1							MARS2			CPS1	MTHFD2	MTHFD2
NDUFS8			AMY2B			HPSE2									CH25H	S1PR3	VNN1		NDUFS8	FH		PSAT1	FH	FH							PRKCE			PIGO	GMDS	PSAT1
NDUFA8			AK7			PRKCE									KMO	AASS	SQRDL		NDUFA8	ROCK1		POLR2B	PGM2	UGCG							GNPDA1			PI4KA	XYLB	ASNS
PDGFA			ENPP2			HLCS									FZD4	PPP2R2A	SAT1		PDGFA	MTOR		PCCA	ROCK1	ROCK1							GOT2			EXT2	ASNS	MARS
ALG6						CMBL									B3GNT7	PNPT1	ST3GAL1		ALG6	STT3A		GCH1	MTOR	MTOR							GCH1			FNTB	PHGDH
ACOT2						PIGX									NDUFA1	PPP2R2C	BID		ACOT2	NDUFS6		POLR3E	UGCG	FOS							EARS2			ASNS	PSAT1
NDUFB1						ACSS3									ASAH1	UQCRB	HSD11B1		NDUFB1	SLC37A4		OXCT1	ENO1	MUT							FH			PSAT1	COMT
UGT2B15						NADK									EXT1	GMPR			UGT2B15	TYR		MTOR	STT3A	CPT1A							UGCG			ACSS3	RETSAT
GSR						BCO1									SAT1	CD38			GSR	DHCR24		STT3A	SGSH	PFKP							SGSH			PGM2	ACO1
WASF1						POLD2									ECHDC1	PAFAH1B1			WASF1	INPP5E		FOS	ECHS1	PAFAH2							P4HA1			ENO1	IVD
ENTPD8						NDUFS6									BCO1	GALK1			ENTPD8	CA8		P4HA1	INPP5K	QARS							LPIN2			STT3A	NDST4
ATP5F1						ALG6									PPP2R2A	PNLIPRP1			ATP5F1	PFKP		NDUFS6	PDHA1	SETDB1							PDGFA			MTHFD1L	EPRS
NDUFB11						XDH									AKT1	NAMPT			NDUFB11	MOGAT1		MUT	DHCR24	MTHFD1							GMPS			SCD	PDE3A
COX5A						AZIN2									PNPT1	FUT6			COX5A	MTHFD2L		CPT1A	TKT	GLS							RIMKLB			EPRS	AARS
CAD						PDE9A									AZIN2	NME5			CAD	CACNA1D		WASF1	PFKP	DLAT							ALG9			PIGG	GARS
BCL2						INPP5K									TRADD				BCL2	MTHFD1		CYP11A1	NAPRT	POLD3							CPT1A			GMPS	MGAT4C
DLAT						TYR									JAK2				DLAT	PANK2		INPP5E	QARS	MTHFD2							MUT			ACACB	RIMKLB
POLD3						CYP11A1									PPA1				POLD3	GGT1		COQ3	WASL	KMT2E							MAN2A1			RIMKLB	CPT1A
POLR2L						ACYP1									GUK1				POLR2L	GLS		FUK	ACOT12	LPIN1							PDHA1			CPT1A	ATP1A3
PRKAG3						COX7A2L									PDE9A				PRKAG3	PGP		PDE4D	GLS	GNE							ENTPD4			PLD1	ALG1
MTHFD2						HMGCLL1									PPP2R2C				MTHFD2	MTHFD2		MTHFD1	MCCC1	ACAT2							NDUFS2			MUT	CNDP2
TSTA3						ATP5F1									AK2				TSTA3	OGT		DLAT	MTHFD1	LARS2							HS2ST1			MAN2A1	HKDC1
ADCY7						ARG2									NDUFB2				ADCY7	BPGM		GLS	MAPK14	SETD2							MGAT5			PDHA1	MARS
ITPKB						MTHFD2L									IRF1				ITPKB	ALG3		POLD3	MTHFD2	HSD17B4							FUK			DHCR24	RDH10
HRAS						ETNPPL									NT5C3A				HRAS	ALDH6A1		MTHFD2	GLUD1	P4HA2							GCLM			GUSB	PLCB1
NDUFA10						TXNRD2									NDST2				NDUFA10	EP300		SCP2	ALG3	IARS							PDE4D			TKT	GLDC
NTRK1						PLA2G6									HS3ST1				NTRK1	POLR1C		MTMR6	ATP6V0D1	DHCR7							WASL			ALDOB	ABAT
ATP6V0C						PPP2R2D									PGAP1				ATP6V0C	RPIA		AKR1D1	GFPT1	PCK2							GNAQ			NDUFS2	MTR
ETHE1						ADCY7									UQCR10				ETHE1	P4HA2		PDSS2	SMPD1	CTSD							GLS			PFKP
LPIN1						ATP6V1C2									PI4K2B				LPIN1	MTFMT		TPH2	RDH10	PIK3C3							MAT2B			PIGT
MAN2B2						APIP									S1PR3				MAN2B2	RAF1		ENPP7	P4HA2	SOS2							DLAT			SUCLG2
ATP6V0D1						CYCS									SOCS3				ATP6V0D1	PDSS1		RALGDS	NT5C2	MTMR14							POLD3			GLDC
DPM3						HMGCS2									LAP3				DPM3	PNPT1		LPIN1	YARS	YARS							ALDH7A1			GALNT16
PIK3CB						GLO1									ELOVL7				PIK3CB	DLST		HPD	COQ6	NDUFS1							MAPK14			FUK
EP300						PFKFB1									PIK3CA				EP300	ST8SIA1		ALDH6A1	SPTLC1	LARS							ACOX1			ST6GAL2
ATF2						AARS2									SOCS1				ATF2	EGF		LARS2	ELOVL1	ELOVL1							ST3GAL2			AGL
ATP1A3						DCK									IDNK				ATP1A3	COX15		P4HA2	NDUFS1	GPCPD1							BPGM			CYP24A1
ATP5B						NDUFB8									TCF7L2				ATP5B	GXYLT1		HSD17B4	ATP5A1	LIPT1							PTEN			ALDH3B1
ATP8						PLCB2									STAT1				ATP8	POLG2		GLUL	DLST	NSD1							PDE3A			MCCC1
UMPS						PDK1									PIK3R3				UMPS	CHST4		IARS	EGF	PIGC							LPIN1			GGT1
CA13						YARS									WARS				CA13	CREBBP		DHCR7	COX15	DLST							GFPT1			PYGB
IARS						EXT1									GUCY1B3				IARS	SDHB		MTFMT	FYN	CHST4							GNE			MTHFD2
CAMK2B						ECHDC1									ACSL5				CAMK2B	GGPS1		PCK2	FGFR1	JUN							ETNK1			PHGDH
DHCR7						FNTA									UQCRB				DHCR7	PIKFYVE		LIPG	ATP6V0A1	PIKFYVE							PIK3CB			SHMT1
PANK4						NDUFA6									TNFRSF11A				PANK4	ATP6V1B2		PIK3C3	GALK1	DBT							LARS2			ACOX1
CTSD						HAAO									RET				CTSD	PIK3C2B		ELOVL6	HARS	ACAA2							RPIA			GLUD1
PLA2G2F						ATP5J2									B3GALT2				PLA2G2F	PPP3CB		PRPS2	ATP5D	ATP6V1B2							POLR1C			DNMT1
G6PD						PPA2									GMPR				G6PD	LPCAT2		MTM1	NIT2	DPYD							RDH10			OGDH
PIK3C3						DGKZ									CHSY3				PIK3C3	GPD2		GART	GK	PKM							HKDC1			PDE3A
NDUFB8						GDA									PLCH1				NDUFB8	PLCH1		IP6K2	ASL	LPCAT2							HS3ST5			PRODH
PIK3CD						NDUFAB1									PNLIPRP1				PIK3CD	ATP12A		POLR3A	PIKFYVE	MTMR3							XYLT2			GFPT1
GSTM4						HEPH									GCNT2				GSTM4	PTGDS		YARS	RPN1	TSC2							IDI1			AARS
TPK1						PRKCZ													TPK1	FASN		NDUFS1	PPP2R2B	UGT8							BDKRB2			CYCS
ST8SIA1						AGPAT1													ST8SIA1	ELOVL5		LARS	ATP6V1B2	HMGCL							UMPS			GNE
PPA1						COX6C													PPA1	CHSY1		GPCPD1	PDGFB	ACOT7							ADCY3			GNS
VNN2						CERK													VNN2	SLC5A7		LIPT1	PKM	SLC22A2							MDH2			HADHA
FGFR1						HOGA1													FGFR1	MMACHC		MAPK8	PGM1	SARS							DEGS1			ALDH5A1
PRKAG2						AK7													PRKAG2	REV3L		ATP5A1	LPCAT2	PLCH1							PIK3C3			DDC
MYC						ATP6V0D2													MYC	CPS1		PIGC	SLC22A2	DDOST							SOS2			CYP51A1
PAICS						PLA2G4A													PAICS	IARS2		DLST	FGFR2	FASN							MTM1			RDH10
UAP1						SARDH													UAP1	HGD		PIGV	PLCH1	CHKA							DNMT3B			HKDC1
SYNJ1						SDHB													SYNJ1	GMPPB		POLG	FBP2	REV3L							SLC33A1			ITPR1
JUN						CA5B													JUN	GADL1		ATP5J2	DDOST	NARS							BCAT1			AARS2
NAGK						NIT2													NAGK	SCD		B3GALT5	GNAI2	IARS2							PIK3CD			P4HA2
PPARA						MGLL													PPARA	EPRS		POLG2	FASN	FNTB							ALAD			PCYOX1
ATP6V0E2						PIKFYVE													ATP6V0E2	PAPSS2		UPRT	DARS	ASNS							POLR3A			IARS
PIK3R2						UGT1A1													PIK3R2	MAP3K5		SQRDL	ELOVL5	GATB							EXT1			GLUL
PLD2						PPP2R2B													PLD2	POLR1A		ITPR2	REV3L	FARSB							CDS2			DHCR7
POLR2J2						AMY2B													POLR2J2	PDPK1		AGPAT1	ACY1	B3GALNT1							AGPAT3			SEPSECS
MAP2K2						LIPC													MAP2K2	TNFRSF1A		CERK	PIGO	MTHFD1L							ECHDC1			SQLE
DBT						ALOX5													DBT	ACSBG2		CKMT1A	IARS2	MVK							PPP2R2A			PCK2
RPN1						ME3													RPN1	LIAS		JUN	EXT2	EPRS							PMM2			NNT
PLCD3						MPI													PLCD3	ROCK2		ACSL1	GADL1	MAP3K5							PIGV			MLYCD
GLCE						POLR3G													GLCE	ACACA		SPTLC3	C1GALT1C1	POLR1A							COX15			PIK3C3
PIGH						PPP3CB													PIGH	LCLAT1		DGKE	SCD	PARS2							B3GALT5			GART
ATP6V1B2						NEU3													ATP6V1B2	POFUT1		GGPS1	EPRS	NOS1							POLG2			BCAT1
DPYD						UQCRB													DPYD	ST3GAL6		GK	MAP3K5	PDPK1							PDE1C			POLR3A
PLOD3						GCG													PLOD3	ABCG8		PIKFYVE	PAPSS2	EXTL3							AK2			GALNT10
ADK						DDOST													ADK	TSC1		RETSAT	PIGG	EHMT1							ITPR2			PDE5A
WASF3						PTGDS													WASF3	FPGS		DBT	POLR1A	ACACA							AGXT2			LARS
SARS						GALNT11													SARS	DNMT1		ACAA2	NOS1	TCIRG1							AGMAT			NDUFS1
CALM1						ATP5L													CALM1	HSD17B12		ATP6V1B2	ACSL3	OCRL							PIP4K2B			GPCPD1
GPD2						CARS2													GPD2	MTHFR		PDGFB	PDPK1	FARS2							PPT1			ENTPD2
ASPA						AOC1													ASPA	GSS		PKM	PLCB1	B3GNT4							DHODH			GARS
FGFR2						GSTO1													FGFR2	PNPLA7		NANP	PPP2R5C	PHGDH							BPNT1			POLG
GCAT						AK5													GCAT	CSGALNACT2		POLR3G	MAPK1	KMT2C							DGKE			GLB1
KDSR						PPP2CB													KDSR	GNS		MTMR3	UPP1	ACAT1							PIKFYVE			PDE1C
FASN						DAD1													FASN	POLR1B		TSC2	ACACA	GSS							DBT			GDA
RARS2						B4GALT6													RARS2	ATP6V0A2		UGT8	PYGL	AARS							GLCE			LDHD
DARS						HSD3B1													DARS	FDFT1		ACOT7	ST3GAL6	HADHA							ATP6V1B2			MARS
ATP5L						INPP4B													ATP5L	PNLIPRP1		SARS	PHGDH	GNS							ALG10B			GPAM
ATP1A2						PDE6H													ATP1A2	SUV39H1		PDE7A	DNMT1	HYAL2							DPYD			CKMT1A
MAN2B1						ATP5H													MAN2B1	YARS2		POLR3K	HSD17B12	PISD							PDXK			ABAT
PGD						GADL1													PGD	GPX3		PLCH1	ACAT1	CYP51A1							PDGFB			MTR
COX7B2						LDHA													COX7B2	DGKH		NAMPT	PNPLA7	FDFT1							NANP			GOT1
REV3L						TYRP1													REV3L	OXSM		FASN	GSS	ACSL4							PPP2R3A			AGMAT
CYB5R4						B3GALNT1													CYB5R4	NNT		NUDT12	ALDOC	PNLIPRP1							MPI			ATP5C1
FNTB						FHIT													FNTB	FMO3		PGD	GNS	PTGS2							NEU3			BPNT1
CYP2J2						DSE													CYP2J2	PLCG1		CHKA	HADHA	NME5							TSC2			CAT
ALDOA						FAXDC2													ALDOA	PCK1		REV3L	PNLIPRP1	SQLE							CHPF2			XYLB
KRAS						PNPLA4													KRAS	GFPT2		CPS1	PTGS2	DGKH							ALG1			RRM1
SLC2A2						ENPP6													SLC2A2	GUCY1A2		DOLPP1	TALDO1	NNT							PDE7A			ACO2
CYC1						ACYP2													CYC1	IPPK		NARS	SLC7A5	ELOVL4							PLCH1			RETSAT
MAPK13						AKT1													MAPK13	GNAI1		IARS2	SLC44A1	AHCY							IMPA1			ACO1
PLCH2						MAN1C1													PLCH2	CHST14		ASNS	DGKH	SDHA							FASN			ALDH18A1
FHIT						ATP5O													FHIT	INPP5B		GADL1	SQLE	ADSL							CHSY1			RPN1
SCD						PRKCB													SCD	SIRT1		GATB	NNT	IPPK							PRDX6			PDE3B
CALM2						MAP3K5													CALM2	ABCC1		SCD	PLCG1	LIPA							COX17			ITPR3
EPRS						PFKFB2													EPRS	SP1		FHIT	GUCY1A2	PNPLA6							REV3L			PSPH
ATP5O						ACSM3													ATP5O	MARS		EPRS	IPPK	NSDHL							B4GALT6			FADS1
AKT1						CDO1													AKT1	NAT8L		ADCY9	GALNT2	NFKB1							CPS1			MTMR3
B4GALT2						GUK1													B4GALT2	PPCDC		PAPSS2	LIPA	GARS							DOLPP1			PGK1
NME2						HS6ST2													NME2	BHMT		PFKFB2	CHST14	WASF2							EXT2			PGM3
PIP5K1C						PDGFRA													PIP5K1C	GSTK1		PARS2	EGFR	KMT2A							SOAT1			LPCAT2
ATP6AP1						CA14													ATP6AP1	NDST2		ACHE	GAMT	ACOX3							HDC			ALG1
PC						PIK3R5													PC	C1GALT1		UGP2	MDH1	ST3GAL4							HGD			GCAT
PIK3R5						ACSBG2													PIK3R5	PGAP1		PDGFRA	ABCC1	PDHX							GMPPB			ACLY
PLD3						PLCB1													PLD3	S1PR1		PDPK1	NME7	SP1							MTHFD1L			DDOST
G6PC3						PPP2R5C													G6PC3	WHSC1L1		PLCB4	SP1	MARS							LPCAT1			GATM
PIGT						NDUFA12													PIGT	RARS		MAPK1	MARS	DNMT3A							PAPSS2			RARS2
PLCB1						ADCY2													PLCB1	IL4I1		ACACA	HK1	HK1							MAP3K5
MAPK1						AK9													MAPK1	XYLB		CRLS1	DNMT3A	PAFAH1B1							POLR1A
ACACA						CREB3L3													ACACA	PIK3CA		OCRL	LPCAT3	UQCRC2							PARS2
CRLS1						UQCR10													CRLS1	PIP5K1B		FARS2	FOLH1	MTR							ACACB
NT5C						SDR16C5													NT5C	ACO1		HIF1A	PGAP1	B3GNT2							NOS1
CYP2U1						B3GNT4													CYP2U1	MAOA		B3GNT4	LTC4S	HS3ST1							PDPK1
TSC1						GNPAT													TSC1	BTD		AMD1	RARS	LTC4S							TNFRSF1A
PRKCA						RAC2													PRKCA	MTMR4		TSC1	ALDH18A1	RARS							KYNU
PRKACA						LYPLA1													PRKACA	ADPGK		PHGDH	ACO1	WHSC1L1							SGMS2
CEL						NMRK1													CEL	ACLY		OTC	BTD	SC5D							PLCB4
PTS						AASS													PTS	ALG2		AMPD3	CTH	ACO1							SYNJ2
DNMT1						MTHFR													DNMT1	POLR3F		AGPS	ACSBG1	ATP1A1							ROCK2
ATP6V1G1						NT5M													ATP6V1G1	ATP6V1H		DNMT1	PYCR1	CTH							ALAS1
NEU1						PHOSPHO2													NEU1	CHST15		GSS	SGPL1	GPLD1							ACACA
PCCB						NDUFA4													PCCB	MARS2		GCLC	GMPR	POLR3B							ST6GAL2
MAT2A						PRKAB1													MAT2A	PLA2G15		HYAL2	ACLY	ACLY							CYP24A1
GCLC						PCYOX1													GCLC	GCH1		GNS	HMGCS1	HMGCS1							PANK3
AGK						IMPAD1													AGK	HIBADH		POLR1B	ATP6V1H	ALG2							PYGB
MBOAT2						DGKH													MBOAT2	ABCA1		PISD	PFKFB3	PPP2R3B							PRKCA
NAGA						ATP5I													NAGA	RIMKLB		NAGA	PLCD1								GATC
RET						AK4													RET	CPT1A		CYP51A1	PI4KA								AMPD3
NOS3						PLB1													NOS3	MAN2A1		IDI2	RPN2								ALDH9A1
FADS2						KMO													FADS2	ENTPD4		FDFT1	NDUFV1								HSD17B12
CAMK2G						NDUFA11													CAMK2G	HS2ST1		CHST12	PSAT1								OGDH
ANPEP						NDUFB5													ANPEP	PAFAH2		ANPEP	FOS								DNMT1
ACSL4						GALC													ACSL4	SLC52A3		PTGS2	ADH5								GSS
PCYOX1						HPGDS													PCYOX1	SETDB1		ITPR1	AGPAT2								GCLC
POLE4						GNAI1													POLE4	H6PD		ACSL4	AMDHD2								AARS
MLYCD						COX7B													MLYCD	DLAT		PNLIPRP1	TARS2								CSGALNACT2
ALG10						MGAT4B													ALG10	POLD3		NME5	ALDH4A1								PDE1A
ATP5I						NDUFB2													ATP5I	PRKAG3		FABP1	MUT								HADHA
TK2						NT5E													TK2	SCP2		OXSM	CPT1A								POLR1B
AHCY						GSTK1													AHCY	ITPKB		NNT	GALNT7								ALDH5A1
KARS						GCGR													KARS	PDSS2		ELOVL4	MAN2A1								PISD
INMT						ATP5C1													INMT	RALGDS		MTTP	PAFAH2								CHST12
ASAH1						GAD2													ASAH1	ETNK1		ALPL	SUCLG2								PTGS2
ADSL						IL4I1													ADSL	MGAT4C		GUCY1A2	CKB								ITPR1
SLC2A1						CHST1													SLC2A1	LARS2		IPPK	GNPNAT1								YARS2
NDUFA7						HPSE													NDUFA7	DMGDH		GALC	DLAT								PON2
ICMT						PIP5K1B													ICMT	XYLT2		PDE10A	ALDH7A1								SQLE
EGFR						FLT3													EGFR	A4GALT		CHST14	POLD3								DGKH
ATP6V1A						UST													ATP6V1A	IARS		INPP5B	TRIT1								OXSM
NFKB1						ETNK2													NFKB1	DEGS1		ACOX3	SCP2								SEPSECS
AHCYL1						ST6GAL1													AHCYL1	DHCR7		ST3GAL4	NDUFA10								NNT
ATP6V0B						COX4I1													ATP6V0B	CTSD		PDHX	PDSS2								ELOVL4
POLR2H						ST6GALNAC4													POLR2H	ELOVL6		SP1	ACOX1								ALG10
MARS						ALDH2													MARS	PIK3C3		PNPLA2	CEPT1								GGCT
SMPD2						ATP5G3													SMPD2	SOS2		MARS	ATP6V0C								CHST3
UQCRC2						ADSS													UQCRC2	CHST11		UQCRC2	PDE6D								IVD
CANT1						VNN1													CANT1	DHDDS		HK1	LPIN1								ST3GAL1
ATP5C1						HSD11B1													ATP5C1	POLR2I		PPIP5K1	ETNK1								SAT1
FOLH1						POLR3F													FOLH1	GART		AGPAT4	ACAT2								PDE10A
HPSE						SMS													HPSE	MTMR14		STT3B	MGAT4C								GNAI1
PIK3C2G						CHST15													PIK3C2G	LARS		QRSL1	GNMT								EGFR
NDUFB9						WBSCR17													NDUFB9	GPCPD1		MGAT4A	AKR1A1								INPP5B
COX5B						GNPDA1													COX5B	LIPT1		MTR	LARS2								GAMT
INPP4A						ITPA													INPP4A	PIGC		B3GNT2	LYPLA2								POLR2D
FLT3						NDUFA8													FLT3	PMM2		NDST2	TUSC3								AHCYL1
IMPA2						AMDHD2													IMPA2	DPAGT1		LTC4S	ATP5B								ABCC1
TPI1						PTGS1													TPI1	CSAD		RARS	HSD17B4								WASF2
NDUFB3						CMPK1													NDUFB3	MOCS2		IL4I1	MDH2								ADCY1
PIK3R3						CERS6													PIK3R3	HPRT1		SC5D	GLUL								PDHX
PIK3C2A						ESD													PIK3C2A	SPTLC3		RRM1	IARS								SP1
COX6A1						FUK													COX6A1	CERS3		ATP1A1	DHCR7								PNPLA2
B3GALT2						CAMK2A													B3GALT2	ATIC		MAOA	PCK2								MARS
CREB1						ADI1													CREB1	PIGN		GBA2	CTSD								PAFAH1B1
ST6GALNAC6						AKR1D1													ST6GALNAC6	DPYD		MTMR4	RRM2								PIP4K2A
GRB2						PDSS2													GRB2	NANP		ITPR3	PFKM								DNMT3A
						CKMT2														TSC2		PIK3R3	PIK3C3								CANT1
						CYP8B1														MTMR3		ADPGK	CHST11								GPAM
						ATP6V0C														SUV39H2		POLR3B	DHDDS								QRSL1
						PRODH														UGT8		POLE2	GPI								SLC22A3
						LPIN1														CALM1		AMT	MTMR14								MTR
						HSD3B2														PDE7A		VNN1	ALAD								MGAT4A
						NDUFS4														CHKA		CHDH	LARS								LPCAT3
						PLA2G2E														DEGS2		ACLY	GPCPD1								PDE8B
						MGAT4C														GATB		HMGCS1	CDS2								ACER3
						UQCRQ														LPCAT1		ALG2	MECR								B3GNT2
						NTPCR														CALM2		MAT1A	UQCRC1								ATP5C1
						NDUFB6														PARS2			DPAGT1								SPTLC2
						COX8A														PLD1			GLB1								NDST2
						FTCD														GUSB			ITPR2								HS3ST1
						GAPDH														SETDB2			NDUFS3								C1GALT1
						COX7C														EHMT1			MYC								PGAP1
						IDI1														GLDC			ALDH1A1								TGDS
						GPD1														ALAS1			PDHB								ATP6V1C1
						IDH2														GALNT16			JUN								CYP2R1
						PLA2G4B														FOXO1			AGMAT								RARS
						RDH12														FBP1			ACSL1								PIGM
						CHST11														TCIRG1			PPT1								ACO2
						POLR2I														OCRL			HPRT1								ACO1
						PRPS2														PHKB			NTRK3								DGKD
						MGST2														RELA			ATIC								INPP4A
						GPX1														AMD1			RETSAT								PDE11A
						GALNT1														PRKCA			PIGN								MTMR4
						CTPS1														EHHADH			ACAA2								ITPR3
						EPHX1														AMPD3			ME1								PIK3R3
						GALNS														ADCY10			DPYD								RPS6KB1
						GNA12														GCLC			PGS1								PSPH
						ADSSL1														HYAL2			TSC2								POLR3B
						HGSNAT														PISD			MTMR3								PIK3C2A
						B4GALT5														CHST12			UGT8								SRR
						TPK1														FADS2			HMGCL								POLE
						PMM2														ACSL4			ACOT7								PPAT
						PIGV														NME5			SARS								ACLY
						PPA1														MLYCD			CA2								GCNT2
						PDE4C														B3GALT6			CHKA								HMGCS1
						ELOVL2														NRAS			PGD
						ENOPH1														ADSL			ACOT8
						ATP5J														GALNT10			NARS
						CAMK2D														SLC2A1			ASNS
						ALG14														TRADD			GATB
						B4GALT1														KMT2A			MTHFD1L
						CSAD														LSS			SCD5
						CKMT1A														PIGF			AUH
						IDO2														PDHX			APRT
						ATP6V1E1														SMPD2			PCYT1B
						AGXT2														GPAM			GSTA3
						ADCY5														STT3B			GUSB
						GNPDA2														SLC19A2			AANAT
						LDHB														MTR			SUCLA2
						NMNAT3														B3GNT2			PIGT
						AGMAT														DHRS9			NANS
						DGAT2														PDE4B			IDH3B
						ADORA3														CREB5			GALNT16
						NTRK3														ELOVL7			FBP1
						NME1-NME2														ATP1A1			TCIRG1
						PIGN														SCLY			TECR
						ACAA2														ITPR3			OCRL
						CHST6														PIK3R3			PAPSS1
						NDUFA2														PIK3C2A			FARS2
						TXNRD1														SRR			PRKCA
						ACOT7														DARS2			AMPD3
						MAPK10														POLE			AGPS
						COX7A2														MAT1A			PCCB
						CALM1																	AARS
						GATM																	NAGA
						UROS																	CYP51A1
						HEXA																	IDI2
						NME1																	ACSL4
						COX7B2																	ELOVL4
						COX17																	AHCY
						TPO																	SDHA
						UXS1																	KARS
						PTGES																	HADHB
						HAL																	ALG12
						HDC																	COMT
						POLR1D																	ADSL
						MVK																	IVD
						CALM2																	SLC2A1
						ATP4B																	PNPLA6
						ATP6V0E1																	NSDHL
						PCYT1B																	AHCYL1
						GSTA3																	WASF2
						PDXP																	GARS
						PIGY																	LSS
						AKT3																	ACOX3
						AANAT																	ST3GAL4
						NDUFV2																	UQCRC2
						PLA2G7																	CANT1
						L2HGDH																	STT3B
						UGT1A3																	HYAL1
						NDUFB4																	MTR
						CES1																	IDH3A
						ADCY10																	ACO2
						PTS																	RRM1
						ATP6V1G1																	ITPR3
						ST6GALNAC3																	ACSS2
						DUT																	POLR3B
						AARS																	PRIM2
						CYP3A4																	PGK1
						PDE1A																	OAT
						MBOAT2
						ENPP3
						GALNT14
						ANPEP
						ECI2
						EPHX2
						NME4
						UQCRH
						GGCT
						MCCC2
						ALPL
						MGAT5B
						CHST3
						NDUFA7
						SAT1
						POLR2D
						ATP5G1
						PNPLA2
						HMBS
						ACER3
						DHFR
						PNP
						CREB5
						TPMT
						NDUFB9
						NDUFC2
						NDUFB3
						PDE11A
						CA7
						PTDSS1
						RPS6KB1
						NT5C3B
						ACSS2
						GUCY1B3
						COX6A1
						ST6GALNAC6
